# Supplementary material for: Insufficiency of compound immune checkpoint blockade to overcome engineered T cell exhaustion in pancreatic cancer
Source: PubMed Central journal article supplement — J Immunother Cancer. 2022 Feb 24;10(2):e003525. doi: 10.1136/jitc-2021-003525 (PMC8883283; doi:10.1136/jitc-2021-003525), 2022-02-24
Supplement: jitc-2021-003525supp002.pdf [file jitc-2021-003525supp002.pdf]

Table with 11 columns: Gene Name, Gene ID, P-value, Log2(FC), NegLog10(P), Log2(FC), NegLog10(P), Log2(FC), NegLog10(P), Log2(FC), NegLog10(P). Rows include genes like Ptp, Csf1r, Fgfri3, Dcaf1, Atp8b4, multi, Ehd4, Mir7042, Rn1, Cox11, Atp6ap2, Tlr8, Skega8, Stk10, Atg4b, Lpcat2, Psmf1, Fam19a3, Vamp2, Zfp831, Usp15, Fboxo2, Bmpr2, Fhnp1, Tead1, Ndr1, Cpxo, Tpd52, Gm1015, Dusp11, Stat4, Narg, Mrm2, Ndr1, Ha-Aa, Ptkcd, Zkscan3, Xcl1, Lamtor4, Chfr, Clec2d, Usp3, Pkg1, Sntb2, Lrcr1, Tmem45a, Tyk2, multi, Mir6391, Zfp472, Gm10914, Cpm, Epb41, Pbxp1, Pigv, Hsh2d, Rnuai1, Tmem141, Chp2, Ldlrad4, Nij1, Dcn, Vps13a, Kna3, Phpp3, Mbnl2, Stp4, Thai, Pmpca, Ddx24, Rgs16, Gm1966, Zfp260, Sfb3b1, Glp1r, Ctl, Foxo1, Zswim1, Ifi202, Mif3, Ora3, Wrap73, Prg2, Mir151, Rnuib6, Utp15, Cd9, I810018F18R1, BC065397, Ctnb2p2n1, Teaz3, A323005P2ol, Thg3, Mir28c, Zfp329, Map3k8, Prom1, Skicr04, Serine2, Trim65, Apeh.











Table with multiple columns containing gene symbols (e.g., Zmynd15, Fam53b, multi) and numerical values. The table lists various genes and their associated numerical data points across multiple rows.

















Table with 12 columns: Gene Name, Correlation Coefficient, P-value, and 9 other numerical values. Rows include genes like Cmh, Gm4532, Tdf712, Adgre1, Pknox2, Reg3g, Mir30a, Cstsd, Plscr1, Chrac1, Mblac2, Mkl1, Zfp715, Rhms3, Nrhp2, Fastk, Usp39, Mir6949, Pitpnm1, Penx2, Gm19703, Pak1, Cdh6, Gm24148, Lyr86, Trim15, Fosb, Arhgap15os, Fcyl1, Mir455, Ilarg, Myebp2, Micall1, Hnmpul1, Card11, Krtap7-1, Mir7006, BC051226, Rhdhd2, Disg1, Pigk, Pms2, Latz2, Lmtk2, Rikz2, Dock8, Fbn1, Etv6, Vmn2r98, multi, Ut6, G230400D17, Hps3, Vsr, multi, Lyn, Vipr1, Aqp1, Pxdn, Ephb2, Cd247, Ez30001N04, Sec2b, Kif2b, Mir6899, Dirc2, Klfk1b9, Slit3, Gm16630, Parva, Ctsk, Xlr4a, Gemin7, Birc6, Rftn1, Ice2, Ick, Mir1912, Wfdc17, Plkb2, Mir1957a, Rbp1, Trak2, Ltb, Lifr, Mir5125, Sbk1, Fhlb2, Sh2d3c, Tap1, Smpd2, Sppl3, Mir483, Pigr, Ifi121, Mir5713, D430042009, 110008F13Ri, Oc4d2, Nectin2, and Whsc1l1.



























Table with 13 columns containing gene names and numerical values. The table lists various genes such as Rad18, Wbscr27, Sh3glb1, Gimap5, Gm8297, Skc3910, Ofri10a5, Tm2d3, Crbn, E430025E21l, Ctdspl2, Meaf6, Lncpint, Zwio, Gimap4, Gm2663, Bmp2k, Gm5934, Bdl1a, Jfb, Akr1c13, Gm3278, Pdss2, Wldc47, Rubcnl, Gm8050, Gm14295, Pflhb, Smad4, Rnasel, Manta, Spag9, Skc389, Mclt2, Zfp955a, Lys, Arhgap15, Tmem54, Sme3, Mirt1, Mir1073, Gm5797, Trpm7, Carr1, Prpf38b, Lys9, Reg3b, Reg2, Vmn1r120, Wsch1l, Rbl2, Chst4, Chst2, Gm2030, multi, 2310058D17R, Dhrs11, Gm10377, Bin2, C4b, Mrpl16, Usb1, Gm19816, 4930572O03l, Mpkip, Madd, Herc3, Twf1, LOC10086161, Vps13b, Exos8, Vmn2r1, Mir142, Saraf, Dcaf15, Sfln2, Ddx17, Gm2964, Ubt2, Cd5, Akrlb10, Vmn1r2, multi, Add3, Ngdn, Pmt2d, Mei, Gm3676, Tram1, Ubezf, Cd48, Srsf10, multi, Pstk, Skg9a, Gnt3, Rsl24d1, Crsp2, Tspal1, Gm10941, and Cdc27.















Table with multiple columns containing gene names (e.g., multi, Lrrc66, 0610030E2ol) and numerical values. The table lists various genes and their associated values across multiple rows.







|              |             |            |            |            |             |            |            |            |            |            |
|--------------|-------------|------------|------------|------------|-------------|------------|------------|------------|------------|------------|
| Snx12        | -0.6780001  | 6.24675077 | 0.01223366 | 0.18104721 | 6.30714047  | 6.60384825 | 6.84626371 | 5.95928224 | 6.13997145 | 5.6239985  |
| Rhm18        | -0.5819537  | 5.65163925 | 0.01224653 | 0.18105112 | 5.97432582  | 6.5594995  | 5.29402298 | 5.39433269 | 5.62283985 | 5.06481469 |
| Gas6         | 0.44316345  | 4.86401488 | 0.01224968 | 0.18105112 | 4.67909512  | 4.5919346  | 4.65626973 | 5.18444297 | 5.06709771 | 5.00524913 |
| Atp10b       | 0.45479496  | 3.88865654 | 0.01226084 | 0.18107556 | 3.70186323  | 3.61302118 | 3.66889278 | 4.10649534 | 4.21014376 | 4.03152297 |
| Mir6995      | 0.462352    | 6.99217067 | 0.01226709 | 0.18107556 | 6.88033946  | 6.68023815 | 6.7224064  | 7.43525418 | 6.97378143 | 7.26100441 |
| Lymr2        | -0.6501121  | 5.39587527 | 0.01229121 | 0.18131509 | 5.93116577  | 5.7400485  | 5.49157974 | 4.78109327 | 5.42954109 | 5.00182323 |
| Prps1        | -0.6572574  | 8.32858282 | 0.01231572 | 0.18144367 | 8.49645301  | 9.44169231 | 8.03348932 | 7.65053735 | 8.45815851 | 7.89116643 |
| Mina         | -0.5101626  | 5.74695493 | 0.01231243 | 0.18144367 | 6.01818447  | 5.96413868 | 6.02378549 | 5.34804596 | 5.33078395 | 5.79679102 |
| Gpr55        | 0.45091459  | 4.52630556 | 0.01234801 | 0.18172059 | 4.49268399  | 4.15042289 | 4.25943791 | 4.95762195 | 4.47985572 | 4.81781019 |
| multi        | -0.8530286  | 8.8246946  | 0.01235033 | 0.18172059 | 9.31422366  | 9.21557705 | 9.22382591 | 7.68868647 | 8.69238818 | 8.81346631 |
| Cntr2        | 0.48445108  | 5.880217   | 0.01236685 | 0.18184724 | 5.60539485  | 5.7711062  | 5.53747332 | 6.1410523  | 6.0363457  | 6.1908296  |
| Mdm4         | -0.7066864  | 6.42862371 | 0.01243947 | 0.18188758 | 6.72922995  | 7.06541013 | 6.55126072 | 5.48535477 | 6.41463659 | 6.32585013 |
| Fam46b       | 0.44862344  | 4.89411847 | 0.01239178 | 0.18188758 | 4.6957604   | 4.62494881 | 4.68871105 | 5.26068386 | 4.97474256 | 5.11986416 |
| multi        | 0.5679226   | 5.61818225 | 0.01240634 | 0.18188758 | 5.60362432  | 5.05843296 | 5.34060556 | 5.80378002 | 5.91906519 | 5.98358542 |
| Mir6244      | 0.49865789  | 3.17382045 | 0.01244082 | 0.18188758 | 3.03195204  | 2.95272648 | 2.78717601 | 3.71039727 | 3.19555961 | 3.36187131 |
| Stard3       | -0.4650114  | 6.24408191 | 0.01240299 | 0.18188758 | 6.45020122  | 6.73350524 | 6.24605645 | 5.92794931 | 6.14903597 | 5.95774329 |
| Pap0g        | -0.4486618  | 6.1472426  | 0.01242533 | 0.18188758 | 6.53113002  | 6.24089605 | 6.34324042 | 6.12192982 | 5.66826857 | 5.97088271 |
| Spz1         | 0.46539369  | 3.63377318 | 0.01242441 | 0.18188758 | 3.22360618  | 3.50367663 | 3.47594709 | 3.86725269 | 3.84857958 | 3.88354429 |
| Gramd3       | -0.6313661  | 9.02295992 | 0.01241889 | 0.18188758 | 9.17323765  | 9.23420533 | 9.30578595 | 8.05607166 | 8.85269285 | 8.91036607 |
| Ptari        | -0.6092235  | 5.86649055 | 0.01242925 | 0.18188758 | 4.68887782  | 5.59886508 | 6.42556399 | 5.45330121 | 5.0691924  | 6.1631428  |
| Dhrs3        | 0.46222543  | 5.09582888 | 0.01248291 | 0.18215536 | 4.97722712  | 5.45683815 | 5.10134522 | 5.60406021 | 5.88595273 | 5.43207105 |
| Snm18        | 0.51414469  | 6.22274059 | 0.01248123 | 0.18215536 | 3.28580693  | 2.4188321  | 2.29236571 | 3.19251913 | 2.75455171 | 2.69236797 |
| Paxbp1       | -0.464886   | 5.55595891 | 0.01248144 | 0.18215536 | 5.68829707  | 5.82967418 | 5.84723442 | 5.21516045 | 5.52623459 | 5.22915277 |
| Cers6        | 0.67320418  | 4.8538714  | 0.01252232 | 0.18261446 | 4.38874952  | 4.58296079 | 4.57993561 | 5.23588647 | 5.61801324 | 4.71735874 |
| Ing3         | -0.6488104  | 5.54335094 | 0.01253862 | 0.18271093 | 5.98022993  | 5.90365418 | 5.71938434 | 4.83292872 | 5.60842313 | 5.21548536 |
| Gknt         | 0.71705274  | 6.07800979 | 0.01256073 | 0.18271093 | 4.82051762  | 4.52562228 | 4.81231037 | 4.97317328 | 5.71721531 | 5.6192199  |
| Vps35        | -1.0768666  | 6.20921889 | 0.01255304 | 0.18271093 | 5.82067946  | 7.18170398 | 7.2405731  | 4.72525741 | 7.01857641 | 5.26850509 |
| Gm4297       | -0.60548981 | 3.31317895 | 0.01255995 | 0.18271093 | 3.74511452  | 2.70802946 | 2.57815815 | 3.94182698 | 3.35516178 | 3.55078281 |
| 4930523Cort1 | 0.0027482   | 8.20738288 | 0.01257135 | 0.18274081 | 8.232291033 | 8.23451522 | 8.52891242 | 6.31891797 | 7.9453597  | 7.72381588 |
| Polb         | -0.4668732  | 5.17492763 | 0.01258376 | 0.18277979 | 5.25492916  | 5.29758106 | 5.67271745 | 4.78435262 | 4.66819077 | 5.37206474 |
| 4.5819078    | 3.71935049  | 0.01258932 | 0.18277979 | 3.22896456 | 3.66427632  | 3.7752442  | 3.81629192 | 3.96959772 | 4.05944793 |            |
| Tmem183a     | -0.6426266  | 6.59104457 | 0.01260062 | 0.18282852 | 6.4568614   | 7.36093482 | 6.9219778  | 6.16749347 | 6.22906721 | 6.41533271 |
| Stim1        | -0.5319049  | 6.0118675  | 0.01262628 | 0.18303609 | 6.91705511  | 7.06155912 | 7.52580333 | 6.58265957 | 6.66065378 | 6.6923896  |
| Rfank        | -0.4755886  | 6.67639485 | 0.01263087 | 0.18303609 | 6.70759826  | 6.95578945 | 7.07918868 | 6.43467333 | 6.32010097 | 6.56102745 |
| Tagln2       | -0.5274651  | 8.01446194 | 0.01266714 | 0.18304584 | 7.99157831  | 8.37455425 | 8.46845087 | 7.22466013 | 8.15501704 | 7.87251105 |
| Wdr12        | -0.5200805  | 6.1344026  | 0.01273273 | 0.18304584 | 6.30045079  | 6.46282565 | 6.61559204 | 5.92016427 | 5.97766423 | 5.78258586 |
| Gstm2        | 0.5751876   | 4.20531192 | 0.01268674 | 0.18304584 | 3.88726644  | 3.96928103 | 3.89770593 | 4.47691809 | 4.88776747 | 4.11462161 |
| Omai         | -0.539537   | 6.15091988 | 0.01271642 | 0.18304584 | 6.33752798  | 3.99915492 | 6.52450725 | 5.73361471 | 5.59937456 | 6.31133988 |
| Tubgcp5      | -0.5862648  | 4.94303494 | 0.01272768 | 0.18304584 | 5.16549104  | 5.32819779 | 5.01481312 | 4.26693838 | 4.84643071 | 4.8333386  |
| Rhoxf3       | 0.62671616  | 4.0662418  | 0.01272579 | 0.18304584 | 3.83781579  | 3.78635098 | 3.63444838 | 4.28600753 | 4.1125456  | 4.74018652 |
| Ppil4        | -0.7227163  | 5.91786457 | 0.01264703 | 0.18304584 | 6.19990294  | 5.90382569 | 6.73393953 | 4.95616523 | 5.72538243 | 5.98797158 |
| Taar4        | 0.49819199  | 3.34610441 | 0.01269737 | 0.18304584 | 3.17008238  | 3.14381714 | 2.97723372 | 3.84045743 | 3.37975581 | 3.56527998 |
| Dctn2        | -0.4427147  | 5.9679291  | 0.01273794 | 0.18304584 | 6.0117402   | 6.21112228 | 6.03500689 | 5.57583616 | 6.17209182 | 5.91949242 |
| C230021G24   | 0.59307207  | 4.27625116 | 0.01271404 | 0.18304584 | 4.06603801  | 4.07033547 | 3.80277188 | 4.83142568 | 4.2373001  | 4.65420589 |
| Dgka         | -0.6973711  | 9.81249341 | 0.01274304 | 0.18304584 | 10.0410184  | 10.1703284 | 10.2703245 | 8.79379804 | 9.92076626 | 9.67689927 |
| Dnaj3        | -0.4822923  | 7.20052771 | 0.01270649 | 0.18304584 | 7.42048753  | 7.23402129 | 7.67051269 | 6.89781054 | 6.96935207 | 7.01098213 |
| Rasgfp3      | -0.5375137  | 4.04440415 | 0.01273118 | 0.18304584 | 4.08174447  | 4.81969069 | 3.94804791 | 3.64149591 | 3.94908746 | 3.64635849 |
| Nudt22       | 0.43590197  | 6.2748505  | 0.01273012 | 0.18304584 | 6.02451954  | 5.87132444 | 6.27485457 | 6.52708285 | 6.30599359 | 6.64572802 |
| Gini         | -0.5335754  | 4.2901528  | 0.012785   | 0.18313143 | 4.62004868  | 4.55102076 | 4.49945545 | 3.7630472  | 4.25963868 | 4.04729983 |
| Ube2l6       | 0.44320374  | 5.1439328  | 0.01282264 | 0.18313143 | 4.96169181  | 4.84851324 | 4.95576734 | 5.1532369  | 5.27071252 | 5.30955497 |
| Cst7         | -0.4454258  | 8.10524757 | 0.01278665 | 0.18313143 | 8.55728864  | 8.09554809 | 8.33104465 | 8.18401482 | 7.52533639 | 7.93825281 |
| Ciao1        | -0.4675418  | 5.62041134 | 0.01282087 | 0.18313143 | 5.77259111  | 5.62018455 | 5.98911256 | 5.24290184 | 5.55256716 | 5.39444285 |
| Fermt1       | 0.59570238  | 3.39211407 | 0.01279641 | 0.18313143 | 3.12123602  | 3.12969977 | 3.03185286 | 3.78475428 | 4.06704002 | 3.2181015  |
| multi        | -0.5210721  | 6.11706785 | 0.01282525 | 0.18313143 | 6.07750667  | 6.31865641 | 6.73667568 | 5.77688156 | 5.88128533 | 5.91145543 |
| 2210016L21R  | -0.4918149  | 6.33636886 | 0.01275927 | 0.18313143 | 6.46529383  | 6.53479042 | 6.79846469 | 6.20593355 | 6.01562321 | 6.0151474  |
| multi        | -0.509931   | 6.74124358 | 0.01282424 | 0.18313143 | 7.00553348  | 6.77663949 | 7.20195432 | 6.36826057 | 6.55616448 | 6.53890914 |
| Arid4a       | -0.4722649  | 6.96608766 | 0.01278645 | 0.18313143 | 7.21262397  | 7.1715971  | 7.20623932 | 6.33315512 | 6.82407069 | 6.81644336 |
| Ofir184      | 0.84231903  | 2.67304779 | 0.01282868 | 0.18313143 | 2.27786176  | 2.21195614 | 2.26584694 | 3.88862513 | 2.72455668 | 2.66944012 |
| Gnpnatt1     | -0.706121   | 5.51821501 | 0.01284938 | 0.18313143 | 5.41942638  | 5.46803253 | 5.82725863 | 4.25868558 | 4.65434838 | 5.68332048 |
| Ufl1         | -0.5894248  | 5.53555486 | 0.01287521 | 0.18334019 | 5.59181081  | 6.13887545 | 5.76011553 | 5.02496559 | 5.91046899 | 4.78709287 |
| Iqgap1       | -0.5108464  | 3.69090919 | 0.01286894 | 0.18334019 | 8.56523717  | 8.5863913  | 8.72191169 | 7.84765741 | 8.3616287  | 8.1317176  |
| Crem         | 0.5459432   | 3.92198019 | 0.01287069 | 0.18334019 | 3.71529282  | 3.82304835 | 3.40933791 | 4.02920731 | 4.24696311 | 4.30801161 |
| Fam129a      | 0.4885992   | 5.67100097 | 0.01295699 | 0.18337683 | 6.14467788  | 5.92002325 | 5.68120063 | 5.83020638 | 5.19849899 | 5.22858436 |
| Mga          | -0.6100039  | 6.1732505  | 0.01295699 | 0.18337683 | 6.68710966  | 6.24546707 | 6.50218061 | 5.66426235 | 6.02372757 | 5.91675592 |
| Ptptrto      | 0.44207315  | 4.90253749 | 0.01295284 | 0.18337683 | 4.77748254  | 4.62477348 | 4.64224671 | 5.20727947 | 4.97243557 | 5.19100715 |
| Nub1         | -0.5573786  | 6.42724686 | 0.01289852 | 0.18337683 | 6.56950087  | 6.47497957 | 6.67332801 | 6.30637914 | 6.3778996  | 5.76139395 |
| Igkb3        | 0.47403817  | 4.99970408 | 0.01292592 | 0.18337683 | 4.86512726  | 4.68232797 | 4.74059975 | 5.41289221 | 5.29537444 | 5.00190283 |
| Crip1        | -0.4918499  | 8.77184302 | 0.01295452 | 0.18337683 | 8.88501142  | 8.93382696 | 9.23446551 | 8.49482264 | 8.59636892 | 8.4865627  |
| Tecn         | 1.54938076  | 2.88503637 | 0.01291092 | 0.18337683 | 2.07227757  | 2.14552142 | 2.11323899 | 3.43498869 | 2.42404028 | 5.12015128 |
| 5.0476131    | 5.26168325  | 0.01291117 | 0.18337683 | 5.5105643  | 4.59379811  | 4.92354538 | 5.73381378 | 5.2065817  | 5.6017     |            |

|              |             |            |            |            |            |            |            |            |            |             |
|--------------|-------------|------------|------------|------------|------------|------------|------------|------------|------------|-------------|
| Tigar        | -0.4538723  | 5.54718473 | 0.01341986 | 0.18566109 | 5.68197807 | 5.89403442 | 5.74635015 | 5.39957899 | 5.36004991 | 5.20111685  |
| Brd7         | -0.4806724  | 6.45441959 | 0.0134076  | 0.18566109 | 6.15551828 | 7.20596408 | 6.72278498 | 5.88163039 | 6.51405992 | 6.2465599   |
| Skv760s      | -0.4733793  | 5.91354975 | 0.01338872 | 0.18566109 | 6.4677908  | 6.05676544 | 5.92616193 | 5.77068593 | 5.69219398 | 5.56770041  |
| Wldc48       | 0.46197266  | 3.66903527 | 0.01338352 | 0.18566109 | 3.4717181  | 3.44740103 | 3.51993397 | 3.95214273 | 3.95129788 | 3.79662418  |
| Gpatch2l     | -0.5975313  | 5.72176455 | 0.01341652 | 0.18566109 | 5.67273972 | 6.28910755 | 6.09974606 | 5.52659714 | 5.45625323 | 5.28614358  |
| Tmem251      | -0.6873906  | 5.16320096 | 0.01343403 | 0.18566109 | 5.55059178 | 5.36218081 | 5.60791447 | 4.30435828 | 5.09183316 | 5.06232367  |
| Foxq1        | 0.43147317  | 4.39599583 | 0.01340515 | 0.18566109 | 4.26290566 | 4.24154943 | 4.03632264 | 4.61689064 | 4.69389142 | 4.52441519  |
| Xp04         | -0.463755   | 5.41086666 | 0.01338185 | 0.18566109 | 5.18994169 | 6.02940165 | 5.70888919 | 4.86554956 | 5.61898396 | 5.05243388  |
| Satb1        | -0.823986   | 8.13069884 | 0.01338472 | 0.18566109 | 8.31349143 | 8.55794904 | 8.75663508 | 6.78512477 | 8.32907693 | 8.0419158   |
| Eif3a        | -0.5422822  | 7.39531943 | 0.01340356 | 0.18566109 | 7.42194665 | 8.10884499 | 7.46858995 | 6.53939108 | 7.62991164 | 7.20323137  |
| Olfir1371    | 0.55845038  | 5.97514368 | 0.01345623 | 0.18566109 | 5.6156819  | 5.93871421 | 5.53335936 | 6.37757106 | 6.10718375 | 6.27835179  |
| 4930562A09l  | 0.44649209  | 5.40191953 | 0.013486   | 0.18566109 | 5.24995662 | 5.02749433 | 5.25886951 | 5.72360376 | 5.58733781 | 5.56455515  |
| Gm8615       | -0.5300039  | 5.70281545 | 0.01348097 | 0.18566109 | 5.71981098 | 6.26108839 | 5.92165281 | 5.49307653 | 5.71637259 | 5.10399142  |
| Lsm1         | -0.5227463  | 4.80129761 | 0.01350176 | 0.18566109 | 4.94874381 | 5.17881411 | 5.06045437 | 4.59245322 | 4.32741286 | 4.69990727  |
| Mpr522       | -0.5270302  | 5.24217795 | 0.01348448 | 0.18566109 | 5.49276389 | 5.43615849 | 5.58815685 | 4.79319827 | 5.24530565 | 4.89748457  |
| multi        | 0.58328742  | 4.21292622 | 0.01349451 | 0.18566109 | 3.93152133 | 3.74793577 | 4.08439044 | 4.52154715 | 3.95491822 | 5.03724443  |
| Olfir1012    | 0.46966341  | 3.1942658  | 0.01351497 | 0.18566109 | 3.1942658  | 3.28510258 | 3.09919122 | 3.60953039 | 3.25597846 | 3.42178367  |
| Gpc3         | 0.45906424  | 3.62312477 | 0.01335415 | 0.18614928 | 3.38021532 | 3.35558997 | 3.44497267 | 3.73818662 | 3.72651965 | 4.09326441  |
| Algu1        | -0.8468967  | 5.82488367 | 0.01334812 | 0.18622993 | 6.34213928 | 6.66938455 | 5.73347223 | 4.84856476 | 5.75333776 | 5.60240344  |
| Zranb2       | -0.453601   | 5.29759633 | 0.0135617  | 0.18630512 | 5.39290074 | 5.70453823 | 5.47575148 | 5.08953199 | 5.09637434 | 5.03008163  |
| Gm13212      | -0.4662534  | 7.1977927  | 0.01364771 | 0.18737479 | 7.49942949 | 7.7364815  | 7.41964032 | 6.8243702  | 7.03834813 | 7.03129396  |
| Card11       | -0.4841822  | 7.05960112 | 0.01355914 | 0.18741974 | 7.15677185 | 7.30800206 | 7.44030271 | 6.52190931 | 7.0761661  | 6.85445472  |
| Hist1hgh     | 0.46882273  | 5.0337067  | 0.01367796 | 0.1874741  | 4.88961288 | 4.58851037 | 4.91976274 | 5.57589071 | 4.93339684 | 5.29506663  |
| Ppil2        | -0.9617148  | 7.31239596 | 0.01368758 | 0.1874741  | 8.17430458 | 7.4751919  | 7.73025706 | 6.47755355 | 7.37784398 | 6.63915701  |
| Ilorb        | -0.4524795  | 7.7995879  | 0.0136813  | 0.1874741  | 7.84161892 | 8.01861095 | 8.21745667 | 7.26913815 | 7.73457314 | 7.71654588  |
| Psma3        | -0.4510072  | 8.00248246 | 0.01369756 | 0.18749917 | 8.10322492 | 8.36228502 | 8.21844817 | 7.73620583 | 7.9967463  | 7.59816451  |
| Bzga3        | -0.603023   | 6.42925447 | 0.01372766 | 0.18779925 | 6.87646461 | 6.46937177 | 6.85736147 | 6.17411966 | 6.30010189 | 5.91089035  |
| Bcr          | -0.5904056  | 5.76269991 | 0.01375741 | 0.18809431 | 5.81334236 | 5.98787359 | 6.37249215 | 5.62381574 | 5.36591035 | 5.41276528  |
| Klei1        | -0.5871414  | 3.45222816 | 0.0137937  | 0.18830229 | 3.45078739 | 3.67985732 | 4.10675192 | 3.29491508 | 2.95801511 | 3.22304213  |
| Mets1        | -0.6252911  | 5.25873778 | 0.0137972  | 0.18830229 | 5.60130211 | 5.21073375 | 5.90211407 | 4.60834519 | 5.06130101 | 5.16863053  |
| H2-Ebh1      | -0.6886046  | 7.51948431 | 0.01379028 | 0.18830229 | 7.41079408 | 8.22905114 | 7.95151454 | 6.68173742 | 8.06839137 | 6.77487731  |
| Prr15        | 0.43783749  | 4.13944474 | 0.01383353 | 0.18868611 | 3.99085307 | 3.88101446 | 3.88971047 | 4.36462603 | 4.44541133 | 4.26505311  |
| Cd46         | -1.0356968  | 3.55934591 | 0.01388775 | 0.18927101 | 3.72952041 | 4.95270078 | 5.34036175 | 2.8986604  | 2.94503858 | 3.28077757  |
| Olfir661     | 0.4729492   | 3.4541278  | 0.01389289 | 0.18927101 | 3.20016325 | 3.23903793 | 3.21375841 | 3.77048141 | 3.47990357 | 3.81242223  |
| Tpx2         | 0.47349533  | 4.46754209 | 0.01391193 | 0.18930609 | 4.27455857 | 4.42214348 | 3.99568121 | 4.98147984 | 4.76465635 | 4.366773307 |
| Cdcg7l1      | -0.923475   | 5.64300419 | 0.01390609 | 0.18930609 | 5.80564035 | 5.56467993 | 5.91390473 | 5.15911411 | 4.81658998 | 5.59806602  |
| Gm9994       | 0.63267849  | 4.73976979 | 0.01393365 | 0.18946595 | 4.31598166 | 4.38363293 | 4.57067704 | 5.09328444 | 5.42931822 | 4.73518444  |
| 49333409K07l | 0.56463157  | 4.12520477 | 0.01395666 | 0.18946595 | 3.90793637 | 3.93684504 | 3.68388555 | 4.73019569 | 4.09871968 | 4.39361641  |
| Qtich1       | -0.4564087  | 6.99369177 | 0.01395603 | 0.18946595 | 7.20474736 | 7.30323642 | 7.15767753 | 6.5581765  | 6.92733495 | 6.81095083  |
| Gpd1l        | -0.4323191  | 6.34154223 | 0.01394773 | 0.18946595 | 6.44881675 | 6.485214   | 6.73907464 | 6.05122545 | 6.12218978 | 6.20273278  |
| multi        | -0.5234718  | 6.02037757 | 0.01396703 | 0.1894948  | 6.3008465  | 6.34752996 | 6.19796403 | 5.44729469 | 6.04970647 | 5.77892338  |
| F3           | 0.56250961  | 3.60239345 | 0.01398273 | 0.18950597 | 3.08621138 | 3.34860338 | 3.52920593 | 3.39739657 | 4.28457102 | 3.76959936  |
| Dock2        | -0.475345   | 3.92667857 | 0.01398434 | 0.18950597 | 4.41593224 | 5.36331395 | 9.71380695 | 8.81808529 | 9.27640971 | 9.2752327   |
| Shl1         | 0.742197524 | 2.86487536 | 0.01400355 | 0.18954389 | 2.93680086 | 3.20355663 | 2.22417328 | 3.18726236 | 3.69425759 | 3.82640244  |
| Zfp935       | -0.4717676  | 6.04901053 | 0.01400303 | 0.18954389 | 6.08567845 | 6.38167648 | 6.38732813 | 5.49099811 | 5.80139156 | 6.11699405  |
| Camsap2      | -0.4374899  | 5.0993203  | 0.01406396 | 0.18986717 | 5.81875466 | 5.5314491  | 5.50888272 | 5.25508273 | 5.18993704 | 5.10154142  |
| Mgme1        | 0.45627634  | 5.32864015 | 0.01406606 | 0.18986717 | 4.9070161  | 4.91859082 | 5.47598001 | 5.51165016 | 5.40717577 | 5.75150904  |
| 2810403A07R  | -0.5357917  | 7.0567723  | 0.01405283 | 0.18986717 | 7.37083173 | 7.2669217  | 7.34075105 | 6.57548302 | 7.08246176 | 6.70418454  |
| Ptp42        | -0.4722577  | 9.1699676  | 0.01406882 | 0.18986717 | 9.48533277 | 9.39916435 | 9.33379229 | 8.81334374 | 9.13235732 | 8.8552754   |
| Mms19        | -0.5802193  | 6.17145987 | 0.01403722 | 0.18986717 | 6.28928065 | 6.59225597 | 6.50317196 | 5.98982475 | 5.58493147 | 6.06929441  |
| 6-Mar        | -0.7271809  | 6.1593056  | 0.01407862 | 0.18988788 | 5.97853047 | 6.37954163 | 7.21061603 | 5.02122166 | 6.27027541 | 6.01474789  |
| Ndufa8       | -0.5085985  | 7.7192841  | 0.01411003 | 0.19019986 | 8.09187337 | 7.89828749 | 7.93058859 | 7.41437277 | 7.7011159  | 7.27947088  |
| Platr5       | 0.49423999  | 5.73502814 | 0.01412667 | 0.19020772 | 5.53232914 | 5.111711   | 5.42022421 | 6.22822419 | 5.73205208 | 5.98617084  |
| Rbm27        | -0.4878707  | 8.8611724  | 0.01412716 | 0.19020772 | 7.08369586 | 7.56064935 | 6.67247751 | 6.50199798 | 6.9006756  | 6.45080715  |
| Olfir1512    | 0.42830066  | 3.62844813 | 0.0141185  | 0.19029404 | 3.53572095 | 3.32971421 | 3.37745821 | 3.93012218 | 3.84933511 | 3.74833808  |
| Klikb19      | 0.44593082  | 4.11489125 | 0.01415452 | 0.19035308 | 4.04937409 | 3.8187668  | 3.80763662 | 4.35632812 | 4.49039303 | 4.24784882  |
| Degs2        | 0.47465229  | 4.41098383 | 0.01418252 | 0.1906181  | 4.19373851 | 4.10653644 | 4.22069809 | 4.83568651 | 4.3465299  | 4.7627135   |
| Sprrh2       | 0.45252547  | 3.73999797 | 0.01421013 | 0.19076604 | 3.47223887 | 3.42135332 | 3.64761351 | 4.0137967  | 3.68871767 | 4.19668478  |
| Dzfp3        | -0.5220484  | 4.22397408 | 0.01420317 | 0.19076604 | 4.07312925 | 4.97235802 | 4.40950752 | 3.79935538 | 4.11205382 | 4.06744049  |
| Atp2a3       | -0.419403   | 7.62308836 | 0.01424635 | 0.19114065 | 7.48902539 | 8.07459425 | 7.93474986 | 7.06191472 | 7.64546275 | 7.3725277   |
| Mup2o        | 0.56794577  | 3.29323026 | 0.01427315 | 0.19138814 | 2.91106845 | 3.07094767 | 3.045756   | 3.59037928 | 3.23427296 | 3.9066971   |
| Ifitm3       | -0.6941661  | 5.61618073 | 0.01430081 | 0.19161816 | 5.61128556 | 6.15999453 | 6.11851127 | 5.34090773 | 5.62636516 | 4.84002053  |
| Vmn2r84      | 0.56854315  | 2.59898808 | 0.01430696 | 0.19161816 | 2.39347594 | 2.37624576 | 2.17454781 | 2.87753947 | 2.6311846  | 3.14104889  |
| 160005661    | 3.49973002  | 0.01432617 | 0.19176371 | 0.19676371 | 3.60882097 | 3.03898614 | 2.95129802 | 3.84289707 | 3.56729202 | 3.98845588  |
| Gpr39        | 0.55481681  | 3.87527423 | 0.01431918 | 0.19181973 | 3.63854418 | 3.53411967 | 3.62093362 | 4.34394168 | 4.33227571 | 3.78183051  |
| Pthr1        | 0.61134682  | 5.64949938 | 0.01438043 | 0.19181973 | 5.19077669 | 5.28749111 | 5.55321011 | 6.17367599 | 5.98560432 | 5.70623814  |
| Prpf40a      | -0.4282675  | 6.31100374 | 0.01436387 | 0.19181973 | 6.10321254 | 6.89399888 | 6.57820112 | 5.58487782 | 6.47265557 | 6.23307638  |
| Rsrp1        | -0.5535402  | 6.71095139 | 0.01435997 | 0.19181973 | 6.62202395 | 6.93269493 | 7.43274564 | 6.41223837 | 6.03757382 | 6.87703164  |
| Trat1        | -0.4633002  | 5.03134795 | 0.01437731 | 0.19181973 | 4.53507006 | 5.50744071 | 5.74648332 | 4.20886571 | 4.82917869 | 5.36104921  |
| H2-Aa        | -1.2173512  | 6.31959663 | 0.01436012 | 0.19181973 | 6.73897228 | 6.87685196 | 7.16891149 | 4.74422928 | 6.89356901 | 5.49488378  |
| Zfp292       | -0.6804475  | 6.74962841 | 0.01440463 | 0.19203113 | 7.27318966 | 7.22200055 | 6.76633703 | 6.13493131 | 6.45291169 | 6.63227091  |
| Nudc13       | -0.5163146  | 6.27599492 | 0.01442063 | 0.19213211 | 6.20567491 | 6.70484815 | 6.69193363 | 6.00671444 | 5.94762025 | 6.09917813  |
| Mifl7e       | 0.44615029  | 4.34161528 | 0.01442893 | 0.19213211 | 4.28048003 | 4.07419048 | 4.0010579  | 4.73417101 | 4.36879034 | 4.59121882  |
| Ifit2o       | -0.5653641  | 6.54456302 | 0.0144375  | 0.19213498 | 6.52308316 | 7.19157714 | 6.76707496 | 5.91691158 | 6.28785971 | 6.58081756  |
| Spint1       | 0.42393979  | 4.94077921 | 0.01446374 | 0.19228639 | 4.69404777 | 4.88906189 | 4.60331829 | 5.01180882 | 5.25401193 | 5.10304736  |
| Zfp330       | -0.4690302  | 5.3        |            |            |            |            |            |            |            |             |

|             |             |            |            |            |            |            |            |            |            |            |
|-------------|-------------|------------|------------|------------|------------|------------|------------|------------|------------|------------|
| Tnfsf8      | -0.4576344  | 5.51197894 | 0.01479635 | 0.19376895 | 5.45675578 | 5.91157626 | 5.85405642 | 4.87597535 | 5.36722331 | 5.60628651 |
| 2310030A07  | 0.45740049  | 2.61921321 | 0.01481023 | 0.19379623 | 2.33730758 | 2.39423535 | 2.43999597 | 2.89472876 | 2.64116016 | 3.00785144 |
| Gak         | -0.41890008 | 7.72857214 | 0.01481553 | 0.19379623 | 7.79370994 | 7.91678648 | 8.10357041 | 7.40678768 | 7.52582713 | 7.62475119 |
| Bvht        | 0.4584739   | 5.03169391 | 0.01483128 | 0.19389488 | 4.83223662 | 4.83813173 | 4.73700251 | 5.43871449 | 5.08903906 | 5.25503902 |
| Zfp639      | -0.4244038  | 5.99435367 | 0.01486085 | 0.19395054 | 5.94795028 | 6.21137709 | 6.46033934 | 5.43100261 | 5.85994317 | 6.05550955 |
| multi       | -0.5907259  | 7.05877227 | 0.01485562 | 0.19395054 | 7.36221679 | 7.16404146 | 7.53614737 | 6.37062173 | 6.97335617 | 6.94625007 |
| Tpp1        | -0.5903472  | 6.39835533 | 0.01486013 | 0.19395054 | 6.12515111 | 6.72767999 | 6.7403957  | 6.45253693 | 5.77693149 | 6.08007677 |
| Leprtl1     | -0.4382138  | 7.97092625 | 0.01487812 | 0.19406575 | 8.22635597 | 7.9673215  | 8.37642194 | 7.71622009 | 7.68408586 | 7.85515212 |
| multi       | 0.66633207  | 5.01682288 | 0.01489725 | 0.19420509 | 5.51343228 | 4.34660803 | 4.19093023 | 5.86037101 | 4.75954298 | 5.43005277 |
| Arsh        | 0.58790794  | 7.47911954 | 0.01492152 | 0.19441119 | 8.02452082 | 6.56623573 | 6.96474014 | 8.26274728 | 7.58644236 | 7.47003088 |
| Cdh13       | 0.48061564  | 4.28158518 | 0.01494405 | 0.19448426 | 4.08522411 | 4.06532369 | 3.97328427 | 4.67042377 | 4.70732847 | 4.18792675 |
| Sftzd1      | -0.5563971  | 6.3893583  | 0.01494406 | 0.19448426 | 6.62456246 | 6.62238335 | 6.7395247  | 5.83308961 | 6.47320084 | 6.01098884 |
| Atf6        | -0.5611065  | 6.87311061 | 0.01506622 | 0.19516843 | 6.92704971 | 6.825062   | 7.70887982 | 6.36982331 | 6.62425463 | 6.7835942  |
| multi       | -0.4775744  | 6.50443683 | 0.01500647 | 0.19516843 | 6.45799323 | 6.72358477 | 7.03909406 | 6.1947458  | 6.27884033 | 6.32336277 |
| Serinc3     | -0.4593022  | 10.1225393 | 0.01505402 | 0.19516843 | 10.5268025 | 10.2873306 | 10.2423481 | 10.1646263 | 9.95044825 | 9.56359    |
| Ddk2        | 0.6189118   | 3.78626426 | 0.01501666 | 0.19516843 | 3.58740506 | 3.37127794 | 3.47075208 | 4.58643055 | 4.09457841 | 3.6075015  |
| Mir3095     | 0.4698112   | 4.92958075 | 0.01508386 | 0.19516843 | 4.82485701 | 4.74285901 | 4.51630956 | 5.16258539 | 5.09890048 | 5.23188306 |
| multi       | 0.43060887  | 3.52488879 | 0.01508219 | 0.19516843 | 3.27997581 | 3.31582293 | 3.33295432 | 3.82490074 | 3.74677918 | 3.64889976 |
| Sacm1       | -0.4881763  | 5.73606215 | 0.01502464 | 0.19516843 | 5.93677846 | 5.75644424 | 6.24722821 | 5.34879695 | 5.49686838 | 5.57743866 |
| Mprl58      | -0.5836302  | 7.17621634 | 0.01508192 | 0.19516843 | 7.29466603 | 7.3643618  | 7.74507182 | 6.74853811 | 7.15429893 | 6.75036672 |
| Ly6c        | -0.7308108  | 11.6282891 | 0.01503575 | 0.19516843 | 11.2625147 | 11.6284826 | 11.692086  | 9.87477458 | 11.312591  | 11.2032855 |
| Cond3       | -0.4569034  | 7.1993429  | 0.01509004 | 0.19516843 | 7.42669375 | 7.28197615 | 7.57471397 | 6.94475357 | 7.02202408 | 6.94589589 |
| Mir8091     | 0.6571979   | 5.80800083 | 0.01508865 | 0.19516843 | 5.70536814 | 5.2709852  | 5.46185336 | 5.8088118  | 6.29731219 | 6.30367429 |
| Neck2       | 0.48230071  | 4.71377447 | 0.01515464 | 0.19529851 | 4.48029818 | 4.53932988 | 4.39824428 | 5.1895805  | 4.77369528 | 4.90149725 |
| Mir466d     | 0.49503152  | 7.33813851 | 0.01517265 | 0.19529851 | 7.33832792 | 7.08422148 | 6.84931884 | 8.03674803 | 7.67046561 | 7.04794917 |
| Eef2        | -0.5186053  | 10.2378958 | 0.01517226 | 0.19529851 | 10.3838228 | 10.4387778 | 10.6692646 | 9.6212568  | 10.2554133 | 10.0593312 |
| Peli1       | -0.5607411  | 8.49324942 | 0.01514693 | 0.19529851 | 8.79171434 | 8.77301574 | 8.7561297  | 7.8324678  | 8.29973972 | 8.50642912 |
| Erbb2       | 0.41783669  | 4.77866207 | 0.01518507 | 0.19529851 | 4.53118786 | 4.61985263 | 4.5582002  | 4.9776511  | 5.07896864 | 4.90612151 |
| Bptf        | -0.5918621  | 7.5293855  | 0.01516459 | 0.19529851 | 7.92649293 | 7.7874509  | 7.77666497 | 6.90379201 | 7.55339111 | 7.26883939 |
| Sox4        | 1.13828671  | 4.88919667 | 0.01517944 | 0.19529851 | 4.34940819 | 4.32149106 | 4.28926069 | 5.06091189 | 6.62653645 | 4.71858074 |
| Aq30002Co4  | 0.43584346  | 4.38379734 | 0.0151595  | 0.19529851 | 4.24528004 | 4.11159034 | 4.14075646 | 4.60475585 | 4.70090697 | 4.49949438 |
| Khyn        | -0.4474055  | 5.6382228  | 0.01512054 | 0.19529851 | 6.1589415  | 5.63940947 | 5.83422414 | 5.52374668 | 5.30474995 | 5.46186194 |
| Zfp97       | -0.9846847  | 6.59385511 | 0.01515479 | 0.19529851 | 7.02254987 | 6.40322025 | 6.79572049 | 5.14320452 | 6.54023744 | 6.62109627 |
| Tnshx4      | -0.4151177  | 6.64137511 | 0.01522119 | 0.19565355 | 6.83249581 | 6.82287409 | 6.89143194 | 6.39603333 | 6.38019355 | 6.52522016 |
| Clec4d      | -0.4405919  | 7.99433764 | 0.01523645 | 0.19574027 | 7.79759084 | 8.47493591 | 8.37132904 | 7.29814354 | 8.20257105 | 7.82157545 |
| Akt3        | -0.658253   | 7.81397965 | 0.01529386 | 0.19576613 | 7.9349432  | 8.58280647 | 9.1127223  | 7.25812274 | 7.44190279 | 7.7542304  |
| Ska25a1     | -0.4418145  | 6.57677159 | 0.01528853 | 0.19576613 | 6.78283811 | 6.79588016 | 6.8143182  | 6.22571076 | 6.52660895 | 6.31527333 |
| Mir17047    | 0.52472714  | 5.64239023 | 0.01527227 | 0.19576613 | 5.45499942 | 5.46336528 | 5.22351527 | 6.2956024  | 5.68206793 | 5.73839106 |
| Zfp266      | -0.756619   | 5.29707447 | 0.01528117 | 0.19576613 | 5.38218298 | 5.82748393 | 5.81648504 | 4.20005049 | 5.76766179 | 4.98582611 |
| multi       | -0.4133383  | 6.05055779 | 0.01529809 | 0.19576613 | 6.01979168 | 6.34104452 | 6.41084469 | 5.63097386 | 5.896301   | 6.00439101 |
| Lrrc75a     | 0.41432914  | 4.96449625 | 0.01526102 | 0.19576613 | 4.66439121 | 4.9073946  | 4.70020923 | 5.15434241 | 5.32294564 | 5.07660226 |
| Crebip      | -0.4500272  | 8.17049997 | 0.01528722 | 0.19576613 | 8.4822621  | 8.35258906 | 8.35168956 | 7.90441156 | 8.09931821 | 7.83272934 |
| Cankm21     | 0.45137802  | 5.38463882 | 0.01532141 | 0.19586483 | 5.24202784 | 5.08797446 | 5.14684712 | 5.82499593 | 5.33854156 | 5.667446   |
| Hadh1b      | -0.7324025  | 6.39564713 | 0.01532285 | 0.19586483 | 6.61970816 | 6.19793001 | 6.74050705 | 5.24389919 | 6.22915573 | 6.33528267 |
| Sdha        | -0.523173   | 6.72261125 | 0.01540263 | 0.1966659  | 6.86353577 | 6.96275979 | 7.12501406 | 6.08479702 | 6.78341084 | 6.51615    |
| Tiaf2       | 0.52799433  | 4.48432491 | 0.01540239 | 0.1966659  | 4.35882826 | 3.88874268 | 4.41341229 | 4.93117928 | 4.07918413 | 5.23460281 |
| 2610042Lo4f | -0.4997855  | 5.49429808 | 0.01541249 | 0.1966826  | 5.41317762 | 5.22795525 | 5.09208312 | 6.00688655 | 5.42072173 | 5.8049642  |
| Agos3       | -0.550367   | 5.42415317 | 0.01543149 | 0.19681575 | 5.42702254 | 5.58079949 | 6.09018804 | 5.23996864 | 5.0051529  | 5.20187874 |
| Plg1        | -0.6075157  | 6.71177157 | 0.0154901  | 0.19717264 | 6.94974854 | 7.03462982 | 7.06220984 | 6.4278974  | 6.8081695  | 5.98797434 |
| Fo5f5       | -0.4927586  | 4.05251133 | 0.01549379 | 0.19717264 | 4.65519369 | 4.33320918 | 3.88826957 | 3.86058121 | 4.00780816 | 3.55072937 |
| Clk3        | -0.624864   | 7.88390631 | 0.01547267 | 0.19717264 | 8.00215114 | 7.96846767 | 8.61839617 | 7.36864965 | 7.80038871 | 7.54338454 |
| multi       | -0.4714059  | 7.7789253  | 0.01548361 | 0.19717264 | 7.98040334 | 7.7873629  | 8.27302025 | 7.61388145 | 7.46596658 | 7.54672065 |
| Wbp5        | 0.67954896  | 5.19774981 | 0.0155123  | 0.19729896 | 5.0577496  | 4.99303479 | 4.58581623 | 5.18453614 | 5.68111789 | 5.74691887 |
| Mir7016     | 0.47749235  | 5.84053928 | 0.01553358 | 0.19735112 | 5.86722419 | 5.49685442 | 5.44130071 | 6.58328535 | 5.74455826 | 5.91001277 |
| Anapc4      | -0.6975586  | 6.04430963 | 0.01553106 | 0.19735112 | 6.67228437 | 6.25726456 | 6.2497179  | 5.34972642 | 5.91125433 | 5.8256102  |
| D130040H23  | -0.4289922  | 4.6687889  | 0.01554559 | 0.1973947  | 4.72562505 | 5.2496416  | 4.67458836 | 4.39160512 | 4.68683318 | 4.2844401  |
| Ilgam       | -0.6000833  | 5.19201097 | 0.01557346 | 0.19735025 | 5.28938419 | 5.50399189 | 5.68278186 | 4.60774369 | 5.36028624 | 4.70787796 |
| Pim2        | -0.8605833  | 7.25593751 | 0.01557023 | 0.19735025 | 7.71905285 | 7.38869074 | 7.95094382 | 6.43196721 | 7.36924625 | 6.6757242  |
| Ankle2      | -0.5173353  | 6.30893141 | 0.01559801 | 0.19762346 | 6.19668178 | 6.73963996 | 6.76647542 | 5.99278276 | 5.9298492  | 6.22815932 |
| Gm15612     | 0.50489847  | 3.71593278 | 0.01559528 | 0.19762346 | 3.90008833 | 3.32810717 | 3.15956862 | 4.26105215 | 4.1594239  | 3.48198349 |
| Uhalld1     | -0.4760651  | 6.64371021 | 0.01561717 | 0.1977573  | 6.87616488 | 6.88542922 | 6.88363423 | 6.15216337 | 6.44356996 | 6.6212996  |
| Scal        | -0.4490856  | 5.76661717 | 0.01563957 | 0.19793186 | 6.12764828 | 5.7575959  | 6.08826579 | 5.53096191 | 5.26079265 | 5.83446847 |
| Inha        | 0.45220333  | 5.72147099 | 0.01568025 | 0.19793186 | 5.55439586 | 5.39018482 | 5.4152701  | 6.19788206 | 5.82736634 | 5.81746987 |
| Mir214      | -0.5883934  | 7.6927806  | 0.01571274 | 0.19793186 | 8.12681885 | 8.11849988 | 7.94510561 | 7.06923555 | 7.79713177 | 7.55887668 |
| Atg7        | -0.423979   | 5.96099188 | 0.01567546 | 0.19793186 | 6.06375236 | 6.13981987 | 6.1537186  | 5.54929566 | 5.82942534 | 5.86828621 |
| Mir23a      | 0.46596473  | 4.3913638  | 0.01572926 | 0.19793186 | 4.15404024 | 3.93274742 | 4.38835663 | 4.43333605 | 4.63298949 | 4.80668835 |
| Atm         | -0.6799406  | 6.14808874 | 0.01567946 | 0.19793186 | 6.69891503 | 6.5142305  | 6.25102264 | 5.4149975  | 6.15159983 | 5.87539885 |
| Camp        | -1.1599643  | 6.83901292 | 0.01572201 | 0.19793186 | 6.15666093 | 9.05153732 | 7.048787   | 6.0324448  | 6.83247871 | 5.91216874 |
| Snw1        | -0.5205995  | 6.67405396 | 0.01570397 | 0.19793186 | 7.09934978 | 6.89387527 | 6.80983602 | 6.46964292 | 6.72298783 | 6.04863195 |
| Vegfa       | 0.41413089  | 5.45762687 | 0.01573455 | 0.19793186 | 5.25984447 | 5.26732384 | 5.22451589 | 5.63535383 | 5.7495578  | 5.60916082 |
| Tmx3        | -0.8738331  | 5.3591795  | 0.01572269 | 0.19793186 | 6.2213198  | 6.04562574 | 5.1213426  | 4.49327389 | 5.68807584 | 4.58443914 |
| Rad9a       | -0.5536194  | 6.90640468 | 0.01571122 | 0.19793186 | 6.81193786 | 7.47639731 | 7.26130795 | 6.66129621 | 6.6355439  | 6.59194486 |
| Gm3139      | 0.45292822  | 5.20790828 | 0.01570134 | 0.19793186 | 3.43258326 | 3.21994985 | 3.23046942 | 3.91420745 | 3.47399326 | 3.53538647 |
| Ppp1c       | -0.4300705  | 6.78706184 | 0.01578648 | 0.19796483 | 6.86576678 | 7.22868507 | 6.91183937 | 6.34897184 | 6.94526307 | 6.42184492 |
| Lias        | -0.6031795  | 5.31095061 | 0.01576444 | 0.19796483 | 4.58650744 | 6.157374   | 5.19373968 | 4.99844469 | 5.08052141 | 4.94911463 |
| Hnrnpd      | -0.42       |            |            |            |            |            |            |            |            |            |

|              |            |            |            |            |            |            |            |            |             |            |
|--------------|------------|------------|------------|------------|------------|------------|------------|------------|-------------|------------|
| Ufsp2        | -0.5892358 | 5.38390827 | 0.01612067 | 0.1988763  | 5.55151434 | 5.93997911 | 5.54408508 | 4.6904455  | 5.14672605  | 5.4306995  |
| Ctcf         | -0.5404197 | 6.83784199 | 0.01602731 | 0.1988763  | 6.9636777  | 7.03729142 | 7.32318646 | 6.11650798 | 6.86856278  | 6.71875261 |
| Npntn        | -0.533868  | 6.94005334 | 0.01599947 | 0.1988763  | 7.50719735 | 7.21560423 | 6.89816037 | 6.61762505 | 6.73112277  | 6.67061027 |
| Myoga        | -0.6110904 | 3.8295235  | 0.01622412 | 0.1988763  | 3.67664081 | 3.89193328 | 4.83663198 | 3.3552685  | 3.50178684  | 3.71487962 |
| Ptprk        | 0.43507869 | 3.27353201 | 0.01606346 | 0.1988763  | 3.07496951 | 3.03268578 | 3.06032269 | 3.56273985 | 3.58182343  | 3.32865079 |
| Myoid        | 0.68239739 | 3.87558982 | 0.01601672 | 0.1988763  | 3.54456743 | 3.51735393 | 3.54125201 | 3.84483101 | 4.80533829  | 4.00019624 |
| E030046B03   | 0.43756351 | 4.40972565 | 0.01610686 | 0.1988763  | 4.45545582 | 4.01230098 | 4.10507488 | 5.02223599 | 4.27782374  | 4.58546247 |
| Pik3r1       | -0.7500864 | 7.91043898 | 0.01618906 | 0.1988763  | 8.42873487 | 8.22766099 | 8.20040896 | 6.97891599 | 7.73612207  | 7.89114742 |
| 170010101Ril | 0.4776202  | 4.08731097 | 0.01605839 | 0.1988763  | 3.98030338 | 3.9004631  | 3.66505294 | 4.71130813 | 4.15028031  | 4.11677478 |
| 170010101Ril | 0.4776202  | 4.08731097 | 0.01605839 | 0.1988763  | 3.98030338 | 3.9004631  | 3.66505294 | 4.71130813 | 4.15028031  | 4.11677478 |
| multi        | 0.64117748 | 5.12972531 | 0.01605839 | 0.1988763  | 3.98030338 | 3.9004631  | 3.66505294 | 4.71130813 | 4.15028031  | 4.11677478 |
| Na3o         | -0.9140665 | 6.2533342  | 0.01610584 | 0.1988763  | 7.09623798 | 5.84496605 | 7.18989837 | 5.70176358 | 5.84782906  | 5.83931016 |
| Olf1749      | 0.40944164 | 3.16416133 | 0.01619486 | 0.1988763  | 2.87775969 | 3.16071167 | 2.83985019 | 3.36232637 | 3.56030562  | 3.21010448 |
| multi        | 0.58733914 | 5.12972531 | 0.01619226 | 0.1988763  | 5.45519799 | 4.42246175 | 4.63050749 | 5.67588099 | 4.93098707  | 5.66331657 |
| E330033B04   | -0.6910176 | 5.00959919 | 0.01618379 | 0.1988763  | 4.73209561 | 6.08208439 | 5.22414396 | 4.53431876 | 4.80949168  | 4.62146072 |
| Mir193b      | 0.62208811 | 6.74024104 | 0.0162145  | 0.1988763  | 6.46668783 | 6.43692111 | 6.38452203 | 7.52128427 | 6.57971398  | 7.05339702 |
| Pdia5        | 0.47229952 | 4.45247428 | 0.01621265 | 0.1988763  | 4.16279487 | 4.23788826 | 4.24829043 | 4.79769223 | 4.81508274  | 4.45309715 |
| Zfp119b      | -0.7022265 | 3.57246353 | 0.01617315 | 0.1988763  | 4.42273399 | 3.59166404 | 3.75633237 | 3.12636039 | 3.39298892  | 3.1474309  |
| multi        | -0.4833362 | 9.43343326 | 0.01599972 | 0.1988763  | 9.57835714 | 6.90535624 | 9.84159065 | 8.85869006 | 9.38518308  | 9.33142237 |
| Mir15127     | 0.7714236  | 3.4123794  | 0.0161227  | 0.1988763  | 3.14858929 | 2.9852193  | 2.9461042  | 4.39732921 | 3.03438876  | 3.96255652 |
| Ssxb6        | 0.50242464 | 2.88984471 | 0.01624212 | 0.1989833  | 2.79576978 | 2.5456871  | 2.54465868 | 3.13923617 | 2.90532334  | 3.37857156 |
| Vpss3a       | -0.6214626 | 6.73824198 | 0.01623666 | 0.19915737 | 6.0042076  | 7.28479261 | 7.85791961 | 5.73748792 | 6.82506668  | 6.71997747 |
| Mir1769      | -1.9137154 | 3.1252775  | 0.01628686 | 0.19915737 | 3.08964401 | 5.74588656 | 3.41087509 | 2.67381681 | 1.80701925  | 2.0244233  |
| Chd7         | -0.4524703 | 6.7529397  | 0.01626677 | 0.1992017  | 6.58132636 | 7.18846799 | 7.12619302 | 6.05550981 | 6.72506699  | 6.83999964 |
| 4933402N22   | 0.53371761 | 4.22477969 | 0.01623963 | 0.1992017  | 4.33937008 | 3.8718581  | 3.66545348 | 4.88108418 | 4.06432812  | 4.52558418 |
| Kcmf1        | -0.5310396 | 6.80967828 | 0.01623006 | 0.1992017  | 6.93018278 | 7.0047011  | 7.29701028 | 6.02104688 | 6.72453017  | 6.88689846 |
| multi        | 0.61856625 | 3.28771797 | 0.01620541 | 0.1992017  | 3.21038981 | 3.10402373 | 2.62090601 | 4.07413395 | 3.19848078  | 3.51837356 |
| multi        | 0.61856625 | 3.28771797 | 0.01620541 | 0.1992017  | 3.21038981 | 3.10402373 | 2.62090601 | 4.07413395 | 3.19848078  | 3.51837356 |
| Sk3s2d       | -1.4944532 | 4.70664983 | 0.01623795 | 0.1992017  | 4.71123111 | 4.47507169 | 5.13732552 | 3.80796682 | 3.93140471  | 4.30089732 |
| Them6        | -0.6980806 | 5.15954114 | 0.01621036 | 0.1992017  | 5.87465108 | 5.14576966 | 5.90532364 | 4.61619789 | 4.99263348  | 4.82267108 |
| Mir466p      | 0.60782124 | 3.21641681 | 0.0162261  | 0.20012769 | 3.07318063 | 2.67828524 | 2.99147371 | 4.1728812  | 2.91837649  | 3.4697246  |
| Hgs3t1       | 0.41284705 | 4.60419862 | 0.01643181 | 0.20013369 | 4.45140899 | 4.39619607 | 4.35727024 | 4.92009149 | 4.8278588   | 4.67500346 |
| Skozai       | 0.54005832 | 4.25104542 | 0.01644355 | 0.20014387 | 3.91701013 | 3.96979148 | 4.05624717 | 4.39031835 | 4.88650512  | 4.28640529 |
| Bnk          | -0.9823347 | 4.89906664 | 0.01645006 | 0.20014387 | 4.82502423 | 5.3403129  | 6.00447380 | 4.06666804 | 5.09778963  | 4.05924913 |
| Rab2a        | -0.5219139 | 7.44371968 | 0.0164705  | 0.20018058 | 7.26623603 | 8.14333574 | 7.70445626 | 6.38137885 | 7.7373559   | 7.42017201 |
| Casp3        | 0.60826035 | 6.34616061 | 0.01646751 | 0.20018058 | 6.08608214 | 5.74449285 | 6.2991346  | 7.08195529 | 6.44443959  | 6.42509377 |
| Histzhabe    | -1.2500331 | 5.39486296 | 0.01649016 | 0.20031364 | 5.95455296 | 5.82182849 | 6.8280313  | 4.5203393  | 5.26666929  | 4.52251955 |
| Nestr        | -0.5994872 | 6.4905937  | 0.01650494 | 0.20038718 | 7.44675918 | 7.44678023 | 6.85184773 | 6.35100082 | 7.05746387  | 6.53947359 |
| Pfzta        | -0.4495426 | 6.5580896  | 0.01652719 | 0.20044557 | 6.5757469  | 7.03441783 | 6.73841795 | 6.02174998 | 6.46913065  | 6.59060627 |
| Mphosphio    | -0.4903233 | 5.02974901 | 0.01651855 | 0.20044557 | 5.10002047 | 5.48119503 | 5.24351649 | 4.31935815 | 5.03766848  | 4.99673695 |
| Olf178       | 0.45226393 | 3.80889397 | 0.0165474  | 0.20058549 | 3.59754863 | 3.44991106 | 3.70083683 | 4.24166312 | 3.68389799  | 4.20652621 |
| Psm5         | -0.4606856 | 6.59600646 | 0.01656144 | 0.20064925 | 6.82255195 | 6.89107466 | 6.76542118 | 6.30840497 | 6.66713444  | 6.12141258 |
| Gm19723      | 0.48794702 | 3.76321034 | 0.01658575 | 0.20083792 | 3.63363564 | 3.60470792 | 3.19336691 | 3.85670967 | 4.08908304  | 4.07575883 |
| Ece1         | 0.43244299 | 5.94690175 | 0.01660754 | 0.20095467 | 5.38674785 | 5.9995448  | 5.80574811 | 5.94927016 | 6.46555418  | 6.07454448 |
| Copg2        | -0.6029806 | 5.48293747 | 0.01661288 | 0.20095467 | 5.51083615 | 5.5813387  | 6.26110846 | 5.99593292 | 5.36501489  | 5.18343338 |
| Bel9         | 0.41148237 | 5.21398226 | 0.01664706 | 0.2011564  | 4.70110257 | 5.40022862 | 4.92339203 | 5.19930485 | 5.77482425  | 5.28504422 |
| Erbin        | -0.4999351 | 6.80008255 | 0.01664627 | 0.2011564  | 7.1446258  | 6.94889605 | 7.05662842 | 6.48792219 | 6.78131542  | 6.81281742 |
| Przc2        | -0.4404365 | 8.02782368 | 0.01667074 | 0.20123093 | 7.8021779  | 8.28896752 | 8.05136039 | 7.48657453 | 7.919265    | 8.01535673 |
| Zef1         | -0.4129933 | 6.44752398 | 0.01666433 | 0.20123093 | 6.34966561 | 6.67799499 | 6.93441076 | 5.84197271 | 6.32749365  | 6.5361568  |
| Ambrat       | -0.4306524 | 6.98879028 | 0.01668959 | 0.2012419  | 7.11691174 | 7.42358099 | 7.07995678 | 6.49543422 | 7.07063674  | 6.74622122 |
| Rnf186       | 0.50214359 | 6.09551703 | 0.01670147 | 0.2012419  | 5.78316658 | 5.91537545 | 5.83479367 | 6.38696904 | 6.08814846  | 6.56464897 |
| Cers4        | 0.43213347 | 6.12285107 | 0.01669652 | 0.2012419  | 5.70320151 | 6.12093178 | 5.89621973 | 6.30879495 | 6.459993541 | 6.24802305 |
| Pdhb2o       | 0.5128399  | 3.91992335 | 0.01670668 | 0.2012419  | 3.71848926 | 3.70624208 | 3.56578486 | 3.90323433 | 4.5057916   | 4.12000992 |
| multi        | 1.19789834 | 4.9713075  | 0.01672501 | 0.20135723 | 3.23132692 | 2.82956688 | 2.63366444 | 4.41236638 | 2.93138493  | 4.944475   |
| Zg16         | 0.94220762 | 4.10436087 | 0.01677342 | 0.20151775 | 3.72262753 | 3.65072015 | 3.52642352 | 4.79413327 | 3.70133078  | 5.23092961 |
| Sntb2        | -0.6329229 | 7.13998737 | 0.0167085  | 0.20151775 | 7.31631099 | 7.1524732  | 7.93778812 | 6.583028   | 7.00243667  | 6.8851131  |
| Ph17e        | 0.45824286 | 3.86411143 | 0.01677059 | 0.20151775 | 3.6516292  | 3.48227304 | 3.77109476 | 3.90295494 | 4.158788    | 4.21792864 |
| Gm8709       | 0.4117875  | 5.36512117 | 0.0167671  | 0.20151775 | 5.40898053 | 5.09856859 | 4.97013303 | 5.75244915 | 5.49000308  | 5.47059265 |
| Gm14594      | 0.72479733 | 2.73327741 | 0.01679116 | 0.20162552 | 2.82204443 | 2.19715981 | 2.09343168 | 3.01915029 | 3.5949972   | 2.70837851 |
| Lama5        | 0.4264191  | 5.07375907 | 0.0168382  | 0.20176871 | 4.88054303 | 4.81242682 | 4.88867873 | 5.33631989 | 5.35815541  | 5.16643056 |
| Gmip         | -0.4135399 | 7.95007606 | 0.0168341  | 0.20176871 | 7.35568888 | 7.36093828 | 7.05391082 | 6.83992767 | 6.98026114  | 6.70972954 |
| Magea2       | 0.41032219 | 4.97072874 | 0.01682816 | 0.20176871 | 4.74572677 | 4.86925323 | 4.76137393 | 5.06969945 | 5.32289286  | 5.21472719 |
| Apol8        | 0.55632321 | 5.8804576  | 0.01681551 | 0.20176871 | 5.56310121 | 5.61593616 | 5.62733746 | 6.14809286 | 5.78289893  | 6.54517995 |
| Kcnq1        | 0.61262073 | 4.51433057 | 0.0168136  | 0.2021804  | 4.14971341 | 4.26345786 | 4.21088930 | 4.70793697 | 5.35383127  | 4.40015457 |
| Fat1         | 0.45100995 | 3.9599094  | 0.01689588 | 0.20224895 | 3.7977564  | 3.67579118 | 3.74698945 | 4.43868962 | 4.10805962  | 4.00883687 |
| Olf437       | 0.43052599 | 4.87865897 | 0.0169233  | 0.20236117 | 4.63015381 | 4.65339283 | 4.70660079 | 5.23033521 | 4.96999369  | 5.08153508 |
| multi        | 0.51642049 | 4.25046701 | 0.01694047 | 0.20236117 | 4.58629704 | 3.68933376 | 3.70119349 | 4.89788898 | 4.04448856  | 4.58365423 |
| Apim2        | 0.40595094 | 4.41056673 | 0.01693193 | 0.20236117 | 4.22294354 | 4.12274142 | 4.27708894 | 4.57358124 | 4.53833008  | 4.72871529 |
| Ints6        | -0.4568475 | 6.24606577 | 0.0169213  | 0.20236117 | 6.14415071 | 6.76356451 | 6.51573332 | 5.86443151 | 6.07186908  | 6.11662547 |
| Ano7         | 0.41320814 | 5.08823618 | 0.01696899 | 0.20239924 | 4.9296593  | 4.86086773 | 4.85436929 | 5.24382134 | 5.28942973  | 5.35126966 |
| multi        | -0.5225914 | 5.28783764 | 0.01697889 | 0.20239924 | 5.12229972 | 5.7700429  | 7.87809598 | 6.80971149 | 7.28897975  | 6.98093463 |
| Pacr1        | -0.4145291 | 5.60037062 | 0.01697477 | 0.20239924 | 5.48620582 | 5.88891094 | 6.04778871 | 5.11707888 | 5.36189333  | 5.70034607 |
| Cyp17        | 0.53990166 | 2.7878936  | 0.01697175 | 0.20239924 | 2.5045634  | 2.55733501 | 2.49194718 | 3.44568778 | 2.96326463  | 2.76459018 |
| Snora75      | -0.9836521 | 4.92582091 | 0.01700523 | 0.20249909 | 3.56529871 | 5.71534452 | 4.96943768 | 3.56270642 | 4.48037777  | 3.25604935 |
| Mir3109      | 0.74248151 | 4.14867556 | 0.0170369  | 0.20249909 | 3.62796262 | 3.78213316 | 3.92220862 | 4.02118317 | 4.16516607  | 5.3733997  |
| 170001114R   | 0.4        |            |            |            |            |            |            |            |             |            |

|             |            |            |            |            |            |            |            |             |            |            |
|-------------|------------|------------|------------|------------|------------|------------|------------|-------------|------------|------------|
| Csf3r       | -1.0694938 | 5.38536287 | 0.01758974 | 0.20573963 | 4.98100201 | 6.46960392 | 6.30972334 | 5.01823985  | 4.62615633 | 4.90745178 |
| multi       | 0.44268642 | 4.96731858 | 0.01758451 | 0.20573963 | 4.99475961 | 4.737131   | 4.5060355  | 5.59048445  | 4.96711944 | 5.00838148 |
| Igfbp1b     | 0.47797416 | 3.89654161 | 0.01756142 | 0.20573963 | 3.658996   | 3.65411037 | 3.65955721 | 4.40469403  | 4.1170717  | 3.88482033 |
| Atxn2l      | -0.4457406 | 7.71729703 | 0.01754984 | 0.20573963 | 7.83156266 | 7.92927776 | 8.05966158 | 7.2919865   | 7.70931001 | 7.48198365 |
| A730045E13  | 0.49916589 | 3.47093299 | 0.01754328 | 0.20573963 | 3.488338   | 2.94947085 | 3.22624129 | 3.99638479  | 3.14749695 | 4.01766606 |
| Siah1a      | -0.4640241 | 5.87362365 | 0.01759751 | 0.20573963 | 5.71013756 | 6.44375505 | 6.16301449 | 5.25668725  | 5.7397008  | 5.92844678 |
| Ctdnep1     | -0.4470768 | 6.92349265 | 0.01760257 | 0.20573963 | 7.05903024 | 7.30254294 | 7.07951993 | 6.44086629  | 6.80651127 | 6.8524852  |
| Ipo11       | 0.50156489 | 4.87156967 | 0.01759905 | 0.20573963 | 4.05462633 | 4.93771737 | 4.87001798 | 4.50343249  | 5.76344238 | 5.10018147 |
| multi       | 0.43050843 | 3.36276004 | 0.01754103 | 0.20573963 | 3.37208855 | 2.97266146 | 3.09776745 | 3.61849327  | 3.48966207 | 3.62588742 |
| Cxadr       | 0.7112117  | 4.04661015 | 0.01765652 | 0.20573963 | 3.66600296 | 3.74060793 | 3.66640203 | 4.37214212  | 5.03761486 | 3.79689902 |
| Gm19585     | -0.7876185 | 5.00507451 | 0.01760823 | 0.20573963 | 5.49023054 | 5.63839865 | 5.06802204 | 3.9613599   | 5.01829953 | 4.85413638 |
| Thr7        | -0.465781  | 4.09804135 | 0.01762087 | 0.20578278 | 4.2754376  | 4.42328016 | 4.2940778  | 3.5368727   | 4.06043422 | 3.99814561 |
| Spin4       | 0.49721099 | 3.87869619 | 0.01768299 | 0.20619393 | 3.99905474 | 3.38234544 | 3.50887191 | 4.33384363  | 3.70133102 | 4.34673042 |
| Fgd6        | 0.47171319 | 4.16978231 | 0.01767688 | 0.20619393 | 3.89144267 | 3.93307613 | 3.97806835 | 4.19083686  | 4.28990663 | 4.73536354 |
| Cdr14       | 0.40580985 | 4.86800549 | 0.01767365 | 0.20619393 | 5.70472784 | 5.67285092 | 5.52727293 | 6.18210045  | 5.99902474 | 5.94160599 |
| Rhhp9       | 0.64376522 | 4.40714597 | 0.01775027 | 0.20636136 | 4.14054573 | 4.08810193 | 4.0271424  | 5.36443563  | 4.43153035 | 4.39111974 |
| Selt        | -0.7976785 | 8.58545434 | 0.01774438 | 0.20636136 | 6.68731494 | 0.03272988 | 0.23283635 | 7.39732923  | 9.01928956 | 8.14322597 |
| Vmn2r46     | 0.4431282  | 7.27707213 | 0.0172556  | 0.20636136 | 2.70880267 | 2.34253596 | 2.61559045 | 2.94620289  | 2.81447219 | 3.23563861 |
| 2010315B03R | -0.4893612 | 4.34289095 | 0.01774365 | 0.20636136 | 4.19718662 | 4.85715764 | 4.70837042 | 4.03341341  | 4.18645702 | 4.07470661 |
| Gm19924     | 0.45855925 | 6.04225809 | 0.01770935 | 0.20636136 | 6.0320676  | 5.81374085 | 5.59312693 | 6.37692079  | 6.12627496 | 6.31141738 |
| Cam1        | -0.4726334 | 5.51965131 | 0.0177602  | 0.20636136 | 5.84705679 | 5.87875117 | 5.54209614 | 5.1860309   | 5.30678324 | 5.35718963 |
| Par6g       | 0.43554199 | 3.88522511 | 0.0177555  | 0.20636136 | 3.61988773 | 3.72997169 | 3.65250294 | 4.02223277  | 4.35525475 | 3.9315008  |
| Tmem45a     | 1.3450882  | 3.96644182 | 0.0177832  | 0.20652205 | 3.43556013 | 3.21529727 | 3.23083577 | 4.33997292  | 5.99938336 | 3.57850145 |
| Cttnbp2nl   | 0.40021759 | 3.96400929 | 0.01783512 | 0.20660514 | 3.65860188 | 3.96785929 | 3.6652404  | 4.05228259  | 4.32688484 | 4.11318683 |
| Foxp1       | -0.5169635 | 7.44292969 | 0.0178382  | 0.20660514 | 7.19163743 | 7.81223459 | 7.87045212 | 6.52684747  | 7.52736676 | 7.49721865 |
| multi       | -0.7798874 | 7.2611624  | 0.0182647  | 0.20660514 | 7.66886135 | 8.14767597 | 7.13677915 | 6.17896832  | 7.46422308 | 6.97046398 |
| Man2b1      | -0.4929523 | 7.37019497 | 0.0178283  | 0.20660514 | 7.39297394 | 7.69340567 | 7.76363822 | 6.81174023  | 7.5238722  | 7.03553452 |
| multi       | -0.416841  | 6.52390023 | 0.0180067  | 0.20660514 | 6.71221033 | 6.82828416 | 6.65645868 | 6.27312007  | 6.33046313 | 6.37285602 |
| Tagap       | -0.4263678 | 8.28166621 | 0.01785903 | 0.20677788 | 7.85119636 | 8.88809411 | 8.77525245 | 7.59967946  | 8.39181595 | 8.23760734 |
| A43008919f  | 0.61651332 | 4.35815004 | 0.0189272  | 0.20706361 | 4.35054849 | 3.74861736 | 4.05046029 | 5.16583396  | 3.82942456 | 5.0036199  |
| Vmn2r50     | 0.4534505  | 2.83279897 | 0.0179379  | 0.20716926 | 2.71190986 | 2.55831726 | 2.54799402 | 3.06479173  | 2.86225801 | 3.25152329 |
| Obox3       | 0.57929496 | 3.1206276  | 0.01793487 | 0.20716926 | 2.93543497 | 2.73644629 | 2.8210591  | 3.97642832  | 2.95652912 | 3.29787229 |
| Cd209c      | 0.42395658 | 5.04607963 | 0.01791593 | 0.20716926 | 5.02596466 | 4.7411943  | 4.7315155  | 5.58128944  | 5.00564563 | 5.18725219 |
| Rhpsms      | 0.5310872  | 3.97459793 | 0.01791354 | 0.20716926 | 3.70229463 | 3.63241482 | 3.79245353 | 4.336532896 | 4.42947993 | 3.925157   |
| Rock1       | -0.4487068 | 7.314301   | 0.01794698 | 0.20717    | 7.3563476  | 7.8250771  | 7.44345295 | 6.6720164   | 7.53494822 | 7.06288718 |
| Ezf4        | -0.4378949 | 7.1092225  | 0.01796974 | 0.20720341 | 7.23552597 | 7.46054928 | 7.28856782 | 6.63761379  | 6.98137519 | 7.05207547 |
| Maml2       | -0.4608371 | 7.18094327 | 0.01798594 | 0.20720341 | 7.48395851 | 7.26157111 | 7.50206169 | 6.73179936  | 6.09673907 | 7.10655066 |
| Fam60a      | -0.4103313 | 6.88178334 | 0.0179724  | 0.20720341 | 6.74228453 | 7.0583928  | 7.46006669 | 6.2931307   | 6.76502116 | 6.96978177 |
| Adam10      | -0.6176909 | 6.6005375  | 0.01797734 | 0.20720341 | 6.94078647 | 6.73109073 | 7.05626938 | 5.80662044  | 6.52091482 | 6.54753864 |
| Slain1      | -0.4645071 | 6.40011755 | 0.01799997 | 0.20726049 | 6.31027519 | 6.79710181 | 6.78973624 | 6.07148895  | 6.3601154  | 6.07198771 |
| D130046C19f | 1.35047906 | 3.19125827 | 0.01800893 | 0.20726049 | 2.37073783 | 2.47211336 | 2.70520504 | 4.83782492  | 2.41554657 | 4.34612191 |
| Dr1         | -0.424371  | 5.24325061 | 0.01806998 | 0.20734013 | 5.09768011 | 5.52237209 | 5.74626522 | 4.52257152  | 5.09732687 | 5.47328783 |
| Pd5a        | -0.4404892 | 7.87119062 | 0.01806574 | 0.20734013 | 8.11260671 | 8.15835148 | 8.00334741 | 7.4524373   | 7.80600049 | 7.69444003 |
| Atr         | -0.5373175 | 4.80801717 | 0.01804832 | 0.20734013 | 4.78276782 | 5.26066723 | 5.18659277 | 3.99132912  | 4.56352812 | 5.06321974 |
| Slp0a3r1    | -0.479562  | 7.63002312 | 0.01806471 | 0.20734013 | 7.9759481  | 7.9336725  | 7.69709666 | 7.18747247  | 7.64051688 | 7.34273709 |
| Phf1d       | -0.407159  | 4.82860166 | 0.01803687 | 0.20734013 | 4.85675273 | 5.13379025 | 5.10598986 | 4.49266081  | 4.62902157 | 4.78339472 |
| Rmdnd       | 0.43429654 | 3.29816955 | 0.01805494 | 0.20734013 | 3.07964962 | 3.18237763 | 2.98103659 | 3.6576998   | 3.67020393 | 3.21805974 |
| Vmn2r33     | 0.46347885 | 2.92947698 | 0.01808519 | 0.20741111 | 2.83182135 | 2.58621293 | 2.67517837 | 3.5195437   | 2.79708176 | 3.16701766 |
| Dnajc7      | -0.9602653 | 7.21101445 | 0.0181996  | 0.20760273 | 7.74042012 | 7.39194014 | 7.9416208  | 5.93700628  | 7.33199874 | 6.92372131 |
| multi       | -0.4734012 | 7.98603255 | 0.01811865 | 0.20760273 | 8.08750868 | 8.22356345 | 8.35712731 | 7.7164087   | 7.94202042 | 7.58956677 |
| Cct3        | -0.5704158 | 6.08081039 | 0.01825303 | 0.20820471 | 6.59928503 | 6.1850464  | 6.31372346 | 5.58130228  | 5.97517965 | 5.83032351 |
| Frs1        | -0.4838266 | 6.25553912 | 0.01824103 | 0.20820471 | 6.11779904 | 6.50660764 | 6.5739706  | 5.60641992  | 6.19114693 | 6.2433106  |
| Sk35a1      | -0.4858405 | 4.83121457 | 0.01830251 | 0.20820471 | 5.23826395 | 5.05214432 | 4.93199735 | 4.47873436  | 4.54904698 | 4.73710158 |
| Gbp4        | -0.6187643 | 8.21775143 | 0.01819107 | 0.20820471 | 8.65027555 | 8.43149488 | 8.49963027 | 7.51252525  | 8.22648666 | 7.98609599 |
| Fbln2       | 0.46347528 | 5.07306891 | 0.01820898 | 0.20820471 | 4.76128039 | 4.88940633 | 4.8733071  | 5.45185018  | 5.37931973 | 5.08351975 |
| Zc3hc1      | 0.42346416 | 5.4952313  | 0.01830839 | 0.20820471 | 5.2435386  | 5.13939766 | 5.4675614  | 5.49451575  | 5.61984962 | 6.00652476 |
| Clrha       | -0.4860587 | 7.23067013 | 0.01824059 | 0.20820471 | 7.23271283 | 7.25297262 | 7.93559305 | 6.43215345  | 6.99863894 | 7.53212987 |
| Olfr980     | 0.54216252 | 2.84951003 | 0.01822043 | 0.20820471 | 2.60418855 | 2.30161882 | 2.82947892 | 2.75568873  | 2.88812155 | 3.17196358 |
| Peak1       | -0.5608457 | 8.06435224 | 0.01825977 | 0.20820471 | 8.20064024 | 8.16224785 | 8.67141016 | 7.28365047  | 8.03058415 | 8.03755337 |
| Olfr1322    | 0.62909692 | 3.68647204 | 0.01830642 | 0.20820471 | 3.32664946 | 3.38341364 | 3.40570765 | 3.78301101  | 4.5652395  | 3.65481    |
| Bicc1       | 0.59129295 | 4.3927684  | 0.01827384 | 0.20820471 | 4.07478924 | 4.082459   | 4.13414286 | 4.79207578  | 5.03675363 | 4.23644053 |
| Crllf3      | -0.9008497 | 7.7489814  | 0.01828504 | 0.20820471 | 8.16195242 | 7.89532859 | 7.73093777 | 6.36133678  | 7.66646317 | 7.05970114 |
| Plekha1     | -0.52805   | 6.59744484 | 0.0182753  | 0.20820471 | 6.99193295 | 6.93265493 | 6.6598216  | 6.05985516  | 6.6186116  | 6.32179278 |
| Psm2        | -0.4550954 | 7.75846972 | 0.01824478 | 0.20820471 | 7.89226645 | 8.10483186 | 7.9605559  | 7.31059447  | 7.90958989 | 7.37258164 |
| Pdcd4       | -0.7648824 | 3.90508249 | 0.01829067 | 0.20820471 | 9.97116051 | 9.40615604 | 9.68683234 | 8.41750796  | 9.16432827 | 9.13366539 |
| multi       | 0.52136007 | 3.92058269 | 0.01832077 | 0.20824153 | 4.13349493 | 3.5880701  | 3.25814293 | 4.47842278  | 3.89346597 | 4.17189942 |
| Mir1722     | 0.40357992 | 6.34544213 | 0.0183472  | 0.20824153 | 6.05378327 | 6.31253836 | 6.0643488  | 6.37354821  | 6.71803184 | 6.55011622 |
| Mfsd2a      | 0.58824472 | 4.51033719 | 0.01834787 | 0.20824153 | 4.14352999 | 4.3761457  | 4.12896879 | 4.51627648  | 5.46666295 | 4.43047222 |
| Vmn2r42     | 0.39757472 | 2.48067757 | 0.01834018 | 0.20824153 | 2.44008746 | 2.2135556  | 2.19202662 | 2.78745832  | 2.62497402 | 2.62596245 |
| Smacra2     | -0.4663783 | 6.95424277 | 0.01836632 | 0.20834799 | 7.27569429 | 7.15558637 | 7.13101516 | 6.59031091  | 6.95921732 | 6.61363256 |
| Gm1760      | -0.5681089 | 6.08804575 | 0.01847046 | 0.20884678 | 6.17588121 | 6.14063103 | 6.79978838 | 5.13453913  | 5.81088708 | 6.46654765 |
| Gzf1        | 0.5301264  | 5.29705349 | 0.0184706  | 0.20884678 | 5.19518648 | 4.97292177 | 4.92786263 | 5.32353043  | 5.63232213 | 5.73049752 |
| Sdlt        | -0.6582506 | 4.6741537  | 0.01853013 | 0.20884678 | 4.81225069 | 5.52974453 | 4.66922687 | 4.01898976  | 4.42295352 | 4.59452686 |
| Tspan1      | 0.43869822 | 2.9309042  | 0.01849425 | 0.20884678 | 2.72740549 | 2.68713953 | 2.72012025 | 3.10356862  | 2.97184844 | 3.37534289 |
| Gimap6      | -0.4557931 | 8.41934764 | 0.0185375  | 0.20884678 | 8.28442506 | 8.73616575 | 8.92132172 | 7.59875328  | 8.51055061 | 8.46504944 |
| 28          |            |            |            |            |            |            |            |             |            |            |

|             |              |            |            |            |            |            |            |            |            |            |
|-------------|--------------|------------|------------|------------|------------|------------|------------|------------|------------|------------|
| Csnk1g2     | -0.3932921   | 7.33222865 | 0.01876875 | 0.20950086 | 7.45473105 | 7.47023362 | 7.66165948 | 7.07984108 | 7.07729437 | 7.24961231 |
| Wwci        | 0.39897418   | 4.7076026  | 0.01875609 | 0.20950086 | 4.46334327 | 4.55747753 | 4.50325272 | 4.93829924 | 4.94136411 | 4.84160571 |
| Emsy        | -0.4597579   | 6.99709978 | 0.01881821 | 0.20989178 | 7.2068798  | 7.35417956 | 7.19606882 | 6.57700402 | 7.16979864 | 6.55512985 |
| Xrec5       | -0.8079572   | 5.75280787 | 0.01883149 | 0.20989534 | 5.89895452 | 6.44298263 | 6.12842233 | 5.0939962  | 4.92210532 | 6.03038623 |
| Psip1       | -0.4106673   | 5.84052193 | 0.01882703 | 0.20989534 | 5.81612069 | 6.15167575 | 6.16977029 | 5.44118607 | 5.84059839 | 5.62378041 |
| Speer4d     | 0.4436111    | 3.82729856 | 0.01886226 | 0.21000383 | 4.15670441 | 3.36699389 | 3.29278074 | 4.45329364 | 3.7189495  | 3.97506921 |
| Ofrf23      | 0.58591712   | 3.6597447  | 0.01886864 | 0.21000383 | 3.36072083 | 3.30346086 | 3.16617673 | 4.40113939 | 3.85558121 | 3.33138917 |
| Gm16702     | 0.42375426   | 4.75150738 | 0.01886366 | 0.21000383 | 5.01895573 | 4.20012582 | 4.39980921 | 5.5764551  | 4.44480675 | 4.86889169 |
| Fbp1        | 0.45133576   | 3.77124073 | 0.01890563 | 0.2103137  | 3.55019558 | 3.57780103 | 3.50872195 | 4.26160977 | 3.90234685 | 3.82676922 |
| Trip11      | -0.6203006   | 5.65001636 | 0.01892199 | 0.21039381 | 5.74125886 | 6.21283072 | 5.92641041 | 5.18948955 | 5.07712873 | 5.7529799  |
| Cene1       | -0.5637579   | 6.202857   | 0.01893943 | 0.2104859  | 6.49751498 | 6.911166   | 6.04552683 | 6.01801666 | 5.90312234 | 5.84179518 |
| Gm4759      | -1.037742    | 8.12159161 | 0.01897508 | 0.21057662 | 8.70762859 | 8.5527128  | 8.66104643 | 6.55235226 | 8.13602986 | 8.11077969 |
| Blm         | -0.5551861   | 5.22751228 | 0.01896376 | 0.21057662 | 5.23913208 | 5.49488796 | 5.78129598 | 5.12036498 | 4.60049389 | 5.12889881 |
| Zfp275      | -0.4755079   | 5.73641287 | 0.01898634 | 0.21057662 | 5.95970785 | 5.93315757 | 6.02963513 | 5.58099035 | 5.66782886 | 5.24715749 |
| Cpne8       | 0.43761765   | 3.02309667 | 0.01898806 | 0.210619   | 2.78212045 | 2.81174824 | 2.81899486 | 3.23384831 | 3.04584374 | 3.44602445 |
| Pks1        | 0.40233618   | 3.72477455 | 0.0190173  | 0.21084164 | 3.58123488 | 3.50496065 | 3.48462386 | 3.9460592  | 3.83893329 | 3.99292544 |
| Accs2os     | 0.58043333   | 4.09680638 | 0.01904398 | 0.2109339  | 3.84329941 | 3.72007255 | 3.8563972  | 4.89166761 | 3.9143656  | 4.35503592 |
| Nol1        | -0.4590002   | 4.96125344 | 0.01903732 | 0.2109339  | 5.17468784 | 5.38265954 | 5.01492668 | 4.43756812 | 5.03925437 | 4.71842411 |
| Ntani       | -0.4544307   | 6.73492643 | 0.01906268 | 0.21103935 | 6.76576775 | 6.92433117 | 7.19633236 | 6.21876585 | 6.73527935 | 6.56908207 |
| 4930555G01R | 0.49343864   | 3.03156505 | 0.01907761 | 0.21102886 | 3.07731561 | 2.62596216 | 2.65125943 | 3.5087109  | 2.85145939 | 3.47486828 |
| Uqc3        | -0.39934     | 7.1336186  | 0.01910479 | 0.2110186  | 7.15194852 | 7.26896467 | 7.57895256 | 6.6722802  | 6.95156484 | 7.17800078 |
| Ppp275a     | -0.6042602   | 8.18920467 | 0.01912291 | 0.21134601 | 8.4170183  | 8.59781619 | 8.45918636 | 7.27616346 | 8.23034136 | 8.15470685 |
| Mid2        | 0.39312881   | 3.49092691 | 0.01912717 | 0.21134601 | 3.25919477 | 3.26850056 | 3.35540537 | 3.63777535 | 3.63205765 | 3.79462774 |
| Dnajc8      | -0.3991349   | 5.81249078 | 0.0191715  | 0.21142539 | 6.02258925 | 5.97582934 | 6.03775608 | 5.53171076 | 5.64196609 | 5.66590317 |
| Lins1       | -0.6708382   | 3.0250387  | 0.01915494 | 0.21142539 | 4.51032474 | 5.11061691 | 5.16882728 | 4.329414   | 4.54704468 | 4.24879562 |
| Rasgfi1     | 0.51084781   | 3.63358145 | 0.01914399 | 0.21142539 | 3.36208599 | 3.39578578 | 3.37660088 | 3.94188582 | 4.19926688 | 3.52586336 |
| 7530416G11R | 0.40411528   | 6.16178523 | 0.01916232 | 0.21142539 | 6.04189142 | 5.93011275 | 5.90717561 | 6.4908787  | 6.21568319 | 6.38496673 |
| Gnb1        | -0.40770311  | 8.07830422 | 0.01919266 | 0.21156111 | 8.19492691 | 8.28234414 | 8.36818832 | 7.67445867 | 7.99241096 | 7.95749636 |
| Cars2       | -0.4134636   | 5.69380809 | 0.01927987 | 0.21242054 | 6.10953008 | 5.97504164 | 5.61416663 | 5.5785809  | 5.53133203 | 5.35186664 |
| multi       | -1.8806154   | 8.00529856 | 0.01931707 | 0.21252481 | 7.8914329  | 9.06548492 | 8.79900092 | 7.47472411 | 8.28032526 | 8.59089565 |
| Kdm3b       | -0.4714903   | 6.8078077  | 0.01930701 | 0.21252481 | 7.09071312 | 7.05365756 | 6.98628803 | 6.43183499 | 6.88942836 | 6.39492275 |
| Matr3       | -0.6003046   | 6.93842311 | 0.01931011 | 0.21252481 | 7.26578397 | 7.19386377 | 7.16329609 | 7.03192555 | 6.74659476 | 6.74659476 |
| Teorg1      | -0.4373893   | 6.22566811 | 0.01933115 | 0.2125779  | 6.21052093 | 6.44742547 | 6.67541189 | 5.65321945 | 6.24159285 | 6.12610807 |
| Zfp960      | -0.962057    | 6.63291389 | 0.01935221 | 0.21274069 | 7.01436138 | 7.30495335 | 7.0225045  | 5.04701247 | 6.6529704  | 6.75657767 |
| Dhx38       | 0.43333434   | 5.92398253 | 0.01938472 | 0.21296321 | 5.64502768 | 5.91818279 | 5.55843561 | 6.13786278 | 6.1322844  | 6.13210192 |
| multi       | 1.67337975   | 3.12260442 | 0.01941676 | 0.21305531 | 2.5621016  | 2.39108544 | 2.36444802 | 4.80123205 | 3.69836043 | 2.47829094 |
| multi       | 1.67337975   | 3.12260442 | 0.01941676 | 0.21305531 | 2.5621016  | 2.39108544 | 2.36444802 | 4.80123205 | 3.69836043 | 2.47829094 |
| Hist1h2bc   | 0.50406205   | 6.32341695 | 0.01942091 | 0.21305531 | 5.08761809 | 5.08761809 | 5.23055426 | 5.91664116 | 7.45852506 | 6.30337871 |
| Zyx         | -0.3928099   | 7.20760308 | 0.0194415  | 0.21311474 | 7.38290702 | 7.33239631 | 7.49672079 | 6.95788569 | 6.99871159 | 7.07699059 |
| Dnajc21     | -0.4072993   | 5.73263154 | 0.01944488 | 0.21311474 | 5.66080006 | 5.68026588 | 6.46777762 | 5.11598313 | 5.32151226 | 6.14945207 |
| Msh3        | -0.6418974   | 5.0177878  | 0.01947329 | 0.21324246 | 4.93690085 | 5.73962017 | 5.3396884  | 4.89170477 | 4.83854062 | 4.36027198 |
| Arf61p4     | -0.7154545   | 7.31052296 | 0.0194859  | 0.2132938  | 7.66320544 | 7.53853688 | 7.80300826 | 7.29772194 | 7.17714199 | 6.3852327  |
| Prkx        | -0.7939451   | 6.930141   | 0.01949231 | 0.2132938  | 7.66019095 | 6.78582055 | 7.53532918 | 6.19196864 | 6.73971196 | 6.6405995  |
| multi       | -0.4184249   | 7.6991643  | 0.01952187 | 0.21355125 | 7.53388362 | 8.08892602 | 8.10232056 | 7.14763822 | 7.5006986  | 7.82151879 |
| Xrnl        | -0.7368957   | 8.35121007 | 0.0195718  | 0.21390237 | 8.64984807 | 8.67203545 | 8.83709024 | 7.18966123 | 8.40933344 | 8.34928796 |
| Ikk1        | -0.5649243   | 9.07511711 | 0.01957541 | 0.21390237 | 9.22891242 | 9.53963236 | 9.30419303 | 8.18331927 | 9.19725898 | 8.99738659 |
| Olfrr9      | 0.70640943   | 3.42605422 | 0.01958189 | 0.21390237 | 3.16743752 | 2.99998548 | 3.05112551 | 3.63557754 | 3.26242424 | 4.43977502 |
| Sto06       | -0.7327373   | 8.04096194 | 0.01960083 | 0.21400753 | 9.02680363 | 7.85231509 | 8.34287309 | 7.70578648 | 7.78728761 | 7.53070576 |
| Ap5f1       | -0.4541141   | 6.10580282 | 0.01962006 | 0.2140142  | 6.15425408 | 6.57456227 | 6.26949329 | 5.86282581 | 5.84612858 | 5.92728292 |
| Zfx3        | 0.40984162   | 3.98438751 | 0.0196163  | 0.2140142  | 3.77800738 | 3.77304875 | 3.78734398 | 4.29414449 | 4.22457691 | 4.04920358 |
| Qars        | -0.4919358   | 7.6372894  | 0.01963256 | 0.2140489  | 7.6020094  | 7.93469063 | 8.11307193 | 6.98443983 | 7.79254396 | 7.39698066 |
| 040033496   | 2.77395197   | 2.77395197 | 0.01964512 | 0.21405501 | 2.58001412 | 2.30651393 | 2.63482542 | 3.063186   | 2.93226561 | 2.92690662 |
| Lad1        | 0.40258706   | 5.29067096 | 0.01965863 | 0.21405501 | 5.14006341 | 5.10806663 | 5.02000225 | 5.59404245 | 5.61474912 | 5.31210192 |
| Ofrf1368    | 0.59458436   | 2.35844999 | 0.01966106 | 0.21405501 | 2.03517512 | 2.12482655 | 2.02347175 | 2.45800162 | 3.2386277  | 2.27057211 |
| Actr3       | -0.4292746   | 9.63242752 | 0.01973923 | 0.21419585 | 9.72677737 | 9.88279195 | 9.99408873 | 9.42449691 | 9.54109887 | 9.35023491 |
| multi       | -0.6063902   | 7.04752964 | 0.01973354 | 0.21419585 | 6.85028255 | 7.37854311 | 7.82334536 | 6.67290915 | 6.85303669 | 6.70705785 |
| Gm3230      | 0.39340757   | 4.1806006  | 0.01969994 | 0.21419585 | 3.8965456  | 4.07570517 | 3.76165766 | 4.36274358 | 4.4453819  | 4.10600566 |
| Zfb34       | 0.40522065   | 5.73250974 | 0.01972067 | 0.21419585 | 5.57177578 | 5.72393777 | 5.4455247  | 5.91479423 | 5.90334572 | 5.98722024 |
| Rnf130      | -0.5335011   | 5.92632809 | 0.01973384 | 0.21419585 | 6.15534046 | 6.03803544 | 6.38586006 | 5.26239007 | 5.88957678 | 5.82676271 |
| Lppo        | 0.42868124   | 4.93447637 | 0.01978928 | 0.21419585 | 4.57811545 | 4.88033845 | 4.70195337 | 5.1316947  | 5.09670392 | 5.21805236 |
| Rp71        | -0.527111    | 6.57810379 | 0.0197662  | 0.21419585 | 6.1126243  | 6.91932615 | 7.49302735 | 6.02492627 | 6.73454607 | 6.58480261 |
| Nphs2       | 0.4432012    | 3.84052305 | 0.01980827 | 0.21430673 | 3.67861938 | 3.50063082 | 3.67751669 | 4.37421783 | 3.82774948 | 3.98440412 |
| Tc17        | -0.6545554   | 5.96865101 | 0.01982174 | 0.21430673 | 6.08880883 | 6.18066522 | 6.61832107 | 5.61260581 | 5.95220173 | 5.35931239 |
| Knab2       | -0.3882882   | 6.94555867 | 0.01981421 | 0.21430673 | 6.88768767 | 7.30664087 | 7.25177973 | 6.51663032 | 6.92383841 | 6.84077501 |
| Ift2        | 0.48695644   | 5.30755185 | 0.01982681 | 0.21430673 | 5.15377104 | 5.04661603 | 4.99183383 | 5.65144819 | 5.82859318 | 5.17304883 |
| Zfp11       | 0.56482671   | 3.53445954 | 0.0198135  | 0.21430673 | 3.70523867 | 3.16557085 | 2.91243823 | 3.80090658 | 3.88991086 | 3.73291044 |
| Kras        | -0.8901022   | 6.49717722 | 0.019853   | 0.21430673 | 7.18370322 | 6.75030879 | 6.89253797 | 5.7098949  | 6.74749811 | 5.83802577 |
| Ddx50       | -0.5506796   | 5.07292608 | 0.01976447 | 0.21430673 | 5.30329802 | 5.24878333 | 5.49271626 | 4.29717645 | 4.87055069 | 5.22503171 |
| Rnf167      | -0.4628572   | 7.1813222  | 0.01985232 | 0.21430673 | 7.19854055 | 7.57369748 | 7.46601436 | 6.54860878 | 7.00339974 | 7.29767227 |
| Sox9        | 0.42546866   | 5.03682049 | 0.01983652 | 0.21430673 | 4.78597845 | 4.82261774 | 4.86366228 | 5.13056271 | 5.45310364 | 5.16499800 |
| Odc1        | 0.57282938   | 7.04798834 | 0.01984299 | 0.21430673 | 6.84211273 | 6.26905541 | 7.1735528  | 7.132699   | 7.33710354 | 7.53340655 |
| Top2b       | -0.8283705   | 6.47208131 | 0.01980248 | 0.21430673 | 6.94535129 | 6.89072967 | 6.82271866 | 5.25688242 | 6.4448197  | 6.47198611 |
| Lipo3       | 0.43484551   | 3.89549394 | 0.01982406 | 0.21430673 | 3.80721147 | 4.01021012 | 3.21679197 | 4.06338327 | 4.66239003 | 3.61297679 |
| 0610010Bo8R | -0.5492992   | 7.14312321 | 0.02000777 | 0.21449074 | 6.98671206 | 7.48773654 | 7.77886709 | 6.85574748 | 6.8955731  | 6.8540976  |
| Apha        | -0.5303543   | 6.79004333 | 0.01991125 | 0.21449074 | 7.22564884 | 6.64904742 | 7.29096521 | 6.3046414  | 6.46554925 | 6.80440785 |
| Gm515       | -0.7323466   | 4.55763493 | 0.01993873 | 0.21449074 | 5.65282849 | 4.29860882 | 4.81998742 | 4.22137564 | 4.10701917 | 4.24599003 |
| Olf154      | 0.51254963</ |            |            |            |            |            |            |            |            |            |

|           |            |            |            |            |            |            |            |            |            |            |
|-----------|------------|------------|------------|------------|------------|------------|------------|------------|------------|------------|
| Lydp6h    | -0.51664   | 6.19508304 | 0.02025294 | 0.21523174 | 6.38321872 | 6.78361259 | 6.19337776 | 5.86938565 | 5.91318026 | 6.02772328 |
| Creb3l1   | 0.52978432 | 5.31183306 | 0.02035231 | 0.21523174 | 4.94183661 | 5.09305396 | 5.10593214 | 5.90257482 | 5.40008438 | 5.42751647 |
| Mgst2     | -0.5019168 | 7.70125595 | 0.02021611 | 0.21523174 | 7.79605691 | 7.91489764 | 8.1456885  | 7.12629015 | 7.79195916 | 7.43264333 |
| Atraid    | -0.5599561 | 7.48281107 | 0.02037352 | 0.21523174 | 7.5832262  | 7.5859374  | 8.11860372 | 7.07919475 | 7.41251722 | 7.11618714 |
| Obox5     | 0.42029292 | 2.91774663 | 0.02028725 | 0.21523174 | 2.74014316 | 2.72390613 | 2.65875123 | 3.25134057 | 2.94626368 | 3.18607504 |
| Beam      | 0.38917543 | 5.47953969 | 0.02036744 | 0.21523174 | 5.28854899 | 5.23361235 | 5.3326946  | 5.72566926 | 5.63795216 | 5.65876608 |
| Gsk3a     | -0.3998425 | 7.47879707 | 0.02033552 | 0.21523174 | 7.4256939  | 8.14581451 | 7.44979656 | 7.06362032 | 7.68492923 | 7.10292789 |
| Gm19897   | -0.3938023 | 4.82974829 | 0.02037786 | 0.21523174 | 5.12535017 | 4.90271276 | 5.05188535 | 4.655678   | 4.59973774 | 4.64312572 |
| Mir101c   | 0.60912463 | 5.26012164 | 0.02026867 | 0.21523174 | 7.67437607 | 3.87987074 | 3.31243116 | 8.1234925  | 4.10578251 | 4.46477683 |
| Ube4a     | -0.421992  | 6.68807456 | 0.02037167 | 0.21523174 | 6.76054619 | 7.02240233 | 6.91426315 | 6.18692091 | 6.79492014 | 6.44939466 |
| Cd3e      | -0.4043599 | 10.1927912 | 0.02047407 | 0.21523174 | 10.1601049 | 10.4492462 | 10.5755622 | 9.83021973 | 10.1158732 | 10.0257407 |
| Arxse2    | -0.6747958 | 3.25052324 | 0.02034731 | 0.21523174 | 3.83142984 | 2.82180783 | 4.11124574 | 2.81295663 | 2.80264066 | 3.12377876 |
| Rxh8      | 0.46139905 | 4.30042292 | 0.02030688 | 0.21523174 | 4.26145205 | 4.05884447 | 3.88887366 | 4.75645667 | 4.2449166  | 4.59199506 |
| Alf622270 | -0.4779521 | 6.98143286 | 0.02028672 | 0.21523174 | 7.40097733 | 6.92538695 | 7.33486246 | 6.70940672 | 6.77719454 | 6.74076918 |
| Prpsap2   | -0.5603464 | 6.08265555 | 0.02027774 | 0.21523174 | 6.8718041  | 6.18088271 | 6.03579948 | 5.90526623 | 5.59976789 | 5.9024129  |
| Gm2016    | 0.60421571 | 2.88989661 | 0.02036488 | 0.21523174 | 2.78047567 | 2.54345175 | 2.43970585 | 3.59457971 | 2.60073599 | 3.38096469 |
| Wdr37     | -0.4360579 | 6.34423231 | 0.02037174 | 0.21523174 | 6.31547256 | 6.37458995 | 6.99678356 | 6.0511398  | 5.99828566 | 6.32924707 |
| Extl3     | -0.4196496 | 6.50812196 | 0.02037312 | 0.21523174 | 6.7469299  | 6.82751247 | 6.57937085 | 6.16155654 | 6.5837975  | 6.14951047 |
| Docr      | 0.38663047 | 5.93936982 | 0.02038776 | 0.21523174 | 5.7713052  | 5.85466115 | 5.60637207 | 6.12662898 | 6.24512942 | 6.02629675 |
| Gdpd1     | 0.62321363 | 2.83318783 | 0.02043698 | 0.21565797 | 2.42152265 | 2.52709797 | 2.52747242 | 3.26279645 | 3.64576272 | 2.56947476 |
| Gm19817   | 0.5074872  | 2.71893863 | 0.02049519 | 0.21595799 | 2.6166276  | 2.31018495 | 2.46715265 | 3.50966771 | 2.69131035 | 2.7154485  |
| Zfp280c   | -0.4764662 | 6.28873443 | 0.02050299 | 0.21595799 | 6.29931994 | 6.8219416  | 6.45964112 | 5.7546986  | 6.09637495 | 6.30043933 |
| Mcu       | 0.40207898 | 5.37787514 | 0.02048769 | 0.21595799 | 5.7743816  | 5.01046227 | 5.34260653 | 5.6790038  | 5.27864066 | 5.77909943 |
| Pdgbf     | 0.40641921 | 4.50285267 | 0.02047681 | 0.21595799 | 4.25343097 | 4.33641237 | 4.30908584 | 4.73854307 | 4.81978371 | 4.55986003 |
| Srpk2     | -0.6294619 | 6.17362995 | 0.02053275 | 0.21607331 | 6.55502101 | 6.78130518 | 6.12875646 | 5.61332351 | 5.87026404 | 6.09110951 |
| Vps13a    | -0.605544  | 6.10013421 | 0.0205244  | 0.21607331 | 6.49017183 | 6.25621295 | 6.42333383 | 5.34106562 | 5.82264992 | 6.22837111 |
| Fhlh7f    | 0.42986447 | 4.16017862 | 0.02054283 | 0.21608045 | 4.36127415 | 3.60405154 | 3.87041349 | 4.61497139 | 3.99582646 | 4.51453473 |
| Cdca1a    | 0.41116553 | 5.69348036 | 0.02059886 | 0.21650773 | 5.55939733 | 5.46838861 | 5.43140684 | 6.11887958 | 5.90774444 | 5.67506535 |
| Aamp      | -0.4260425 | 7.04751949 | 0.0206564  | 0.2168781  | 7.1419159  | 7.31781548 | 7.32252084 | 6.91032709 | 6.88274512 | 6.71042252 |
| Igfbp4    | 0.607764   | 6.38711319 | 0.02063834 | 0.2168781  | 5.96655142 | 6.18469226 | 6.09844988 | 6.32911886 | 7.35136651 | 6.3925002  |
| Cedc50    | 0.42489832 | 3.60931443 | 0.0206568  | 0.2168781  | 3.46621677 | 3.40741437 | 3.31696466 | 3.7053044  | 4.02170624 | 3.73828008 |
| Myzl2     | 0.38501037 | 4.5244588  | 0.0206709  | 0.21693123 | 4.41394204 | 4.28983346 | 4.29208536 | 4.78876811 | 4.71005798 | 4.65206587 |
| Denmdc    | -0.5966215 | 8.18785256 | 0.02071351 | 0.21727911 | 8.19462123 | 8.48407509 | 8.81579361 | 7.76793361 | 8.21396187 | 7.68672988 |
| Hs3t3b1   | -0.475908  | 5.87327295 | 0.02072965 | 0.21734922 | 6.16415524 | 6.12511135 | 6.04440346 | 5.54369294 | 5.4593541  | 5.90292063 |
| Gm6345    | 0.41597396 | 6.3526321  | 0.02077781 | 0.2174712  | 6.03459872 | 6.19222312 | 6.20711352 | 6.60890273 | 6.4336869  | 6.64007356 |
| Pnfi      | -0.4375847 | 6.26867776 | 0.02080752 | 0.2174712  | 6.42242384 | 6.57395741 | 6.64482913 | 5.90847388 | 6.38234877 | 5.85763074 |
| Pik3r1    | 0.44997705 | 3.94971891 | 0.02077874 | 0.2174712  | 3.68014358 | 3.94558593 | 3.54866946 | 4.04354451 | 4.30736927 | 4.27323854 |
| Hear1     | 0.40332773 | 3.25139567 | 0.02079263 | 0.2174712  | 3.04775545 | 3.13178457 | 2.96965538 | 3.506982   | 3.38688479 | 3.46531181 |
| Mrsps1    | -0.555362  | 5.4054851  | 0.02079777 | 0.2174712  | 6.11881487 | 5.7131404  | 5.36779958 | 4.83262218 | 5.42675913 | 4.97376488 |
| Atgsp     | -0.4065676 | 7.55242825 | 0.02079548 | 0.2174712  | 7.5920887  | 7.80452391 | 7.87052348 | 7.27487893 | 7.47001273 | 7.30254174 |
| Ctsl      | 0.38467892 | 4.68457737 | 0.02080107 | 0.2174712  | 4.27209954 | 4.79255687 | 4.41205732 | 4.62988576 | 5.21624005 | 4.78462468 |
| Mult1     | 1.32698848 | 3.62138317 | 0.02086279 | 0.21765294 | 3.07222307 | 2.99661059 | 2.80483314 | 4.52828725 | 2.9517562  | 5.37456936 |
| Rer1      | -0.5430561 | 7.40899057 | 0.02084993 | 0.21765294 | 7.63662646 | 7.7291072  | 7.6759187  | 6.6345889  | 7.42031782 | 7.35748081 |
| Sarta     | -0.5143808 | 7.53070826 | 0.02085881 | 0.21765294 | 7.73736399 | 7.86388257 | 7.76244935 | 6.82233271 | 7.6230576  | 7.37516335 |
| Cnh       | -0.4878121 | 5.98270321 | 0.02085648 | 0.21765294 | 6.11064908 | 6.59919884 | 5.96997989 | 5.59913    | 5.8191261  | 5.80534887 |
| Cd3d      | -0.4576284 | 10.3343191 | 0.02090381 | 0.21770412 | 10.3919432 | 10.5586258 | 10.7390469 | 9.8633018  | 10.388114  | 10.064789  |
| Xlr4b     | -0.6609689 | 7.22102428 | 0.02088849 | 0.21770412 | 7.59259652 | 7.30669043 | 7.75523922 | 6.45032504 | 7.25523347 | 6.96606101 |
| Mir450-2  | 0.45156599 | 3.509326   | 0.02090558 | 0.21770412 | 3.18065349 | 3.38539137 | 3.28459781 | 3.6680801  | 3.57341831 | 3.96381492 |
| Psmc3     | -0.577842  | 7.61277085 | 0.02089558 | 0.21770412 | 7.70985306 | 7.8967123  | 8.09842348 | 6.64232404 | 7.42233628 | 7.90697596 |
| Armc1     | -0.6282187 | 5.28185877 | 0.0210917  | 0.21813387 | 5.70402417 | 5.66554315 | 5.41833706 | 5.23939507 | 4.45887176 | 5.20498141 |
| Gpr171    | -0.445343  | 5.6923851  | 0.02109712 | 0.21813387 | 5.95968703 | 5.66937852 | 6.11610421 | 5.52399165 | 5.4940621  | 5.52968212 |
| Capz1     | -0.4964754 | 8.08982218 | 0.02106731 | 0.21813387 | 8.05829731 | 8.59352528 | 8.36235708 | 7.65135997 | 7.73334548 | 8.14004795 |
| Gstm3     | 0.41597241 | 3.81706354 | 0.02104233 | 0.21813387 | 3.52559774 | 3.63626324 | 3.66537102 | 3.91397517 | 3.89790199 | 4.26327206 |
| Speet4f2  | 0.39263571 | 3.96294837 | 0.02108009 | 0.21813387 | 3.7983383  | 3.75852293 | 3.74303031 | 4.22089938 | 4.04574111 | 4.2115519  |
| Bre       | -0.5193589 | 6.6612685  | 0.02099466 | 0.21813387 | 6.5835132  | 7.2038859  | 7.08001988 | 6.41264452 | 6.30762554 | 6.58907209 |
| Itgax     | -0.9501833 | 6.77250455 | 0.02101817 | 0.21813387 | 7.34263383 | 6.48432862 | 7.91582611 | 5.50032399 | 6.44174598 | 6.95016879 |
| Sle44a2   | -0.7887157 | 8.46988053 | 0.0210474  | 0.21813387 | 8.64339408 | 8.88356846 | 9.06575263 | 7.03082962 | 8.53533326 | 8.6620251  |
| Emd       | -0.734044  | 7.17390735 | 0.02106914 | 0.21813387 | 7.13309844 | 7.41156828 | 7.68716166 | 6.74391253 | 7.17613792 | 6.89156526 |
| Atrx      | -0.4357226 | 6.14649697 | 0.02109579 | 0.21813387 | 6.56695767 | 6.70554937 | 6.63056784 | 5.88445336 | 6.43203542 | 6.27941816 |
| Mknk2     | -0.4816417 | 7.59046315 | 0.02109521 | 0.21813387 | 7.75584768 | 8.04212408 | 7.69588029 | 6.92456846 | 7.70957505 | 7.41478333 |
| Rufy1     | 0.44443449 | 5.13535705 | 0.02101058 | 0.21813387 | 4.81736754 | 5.1337142  | 4.78833767 | 5.48084913 | 5.60646473 | 4.98540902 |
| Zerb1     | -0.4602253 | 6.08667572 | 0.02105985 | 0.21813387 | 6.13743511 | 6.32185799 | 6.49111252 | 5.74932525 | 6.08371184 | 5.73661157 |
| Pik3c3    | -0.4166653 | 7.0406518  | 0.0210797  | 0.21813387 | 7.19939295 | 7.29933267 | 7.2482277  | 6.5807074  | 7.00140535 | 6.91047471 |
| Lag3      | 0.57028827 | 5.7545485  | 0.02115853 | 0.21845754 | 5.67234868 | 5.19491385 | 5.54095556 | 6.74871051 | 5.48461312 | 5.88575426 |
| Mult2     | 0.42283859 | 2.93367965 | 0.02115437 | 0.21845754 | 2.85977707 | 2.60780124 | 2.69992276 | 3.06837054 | 3.1707801  | 3.19620919 |
| Fam26d    | 0.39101657 | 3.71612061 | 0.0211253  | 0.21845754 | 2.70258788 | 2.45495357 | 2.49429533 | 3.18787006 | 2.76720827 | 2.86980836 |
| Fbxl3     | -0.3945799 | 6.00796238 | 0.02114634 | 0.21845754 | 6.01185136 | 6.18470513 | 6.41920054 | 5.5063602  | 5.90958015 | 5.97180108 |
| Olfr91    | 0.48994492 | 4.30064935 | 0.02115286 | 0.21845754 | 3.96922058 | 4.08062665 | 4.11718344 | 4.78413804 | 4.25930798 | 4.59341941 |
| Olfr351   | 0.47389755 | 3.47065675 | 0.02118139 | 0.21859541 | 3.18988029 | 3.27520887 | 3.23603475 | 3.96367887 | 3.46710528 | 3.69202341 |
| Lactb2    | -0.4829883 | 5.40397184 | 0.0212547  | 0.21860924 | 5.36321591 | 6.05808657 | 5.51509555 | 4.6785345  | 5.42266147 | 5.38623705 |
| Fshb      | 0.42640184 | 3.32309731 | 0.02129474 | 0.21860924 | 3.19227269 | 3.09217378 | 3.0452427  | 3.84188801 | 3.45274721 | 3.31425948 |
| Fndc3b    | 0.39918463 | 4.66592154 | 0.0212428  | 0.21860924 | 4.41084393 | 4.41724344 | 4.57090031 | 4.90741171 | 4.85685514 | 4.83227471 |
| Gm10705   | -0.4019079 | 5.14236397 | 0.02125972 | 0.21860924 | 4.94939799 | 9.32673989 | 9.20971593 | 9.04472094 | 8.82248065 | 8.95702842 |
| Vmn2r22   | 0.4077945  | 6.26323903 | 0.0213261  | 0.21860924 | 2.6036803  | 2.46222289 | 2.2794221  | 3.11856929 | 2.69700829 | 2.75313133 |
| Zfp772    | 0.44909255 | 4.95421877 | 0.02135948 | 0.21860924 | 4.92201836 | 4.64099048 | 4.62600865 | 5.22728488 | 4.94828808 | 5.36072216 |
| Lsr       | 0.47097719 | 5.25641187 | 0.02137297 | 0.21860924 | 4.90591711 | 4.970981   | 5.1858     |            |            |            |

|             |             |            |            |            |            |             |             |            |            |             |
|-------------|-------------|------------|------------|------------|------------|-------------|-------------|------------|------------|-------------|
| Of1r1331    | 0.81682254  | 3.39007928 | 0.02162701 | 0.2199352  | 2.93637023 | 3.02468112  | 2.98395268  | 4.60802163 | 3.27364376 | 3.51380627  |
| Lrp80s2     | 0.40039933  | 5.34378402 | 0.02164956 | 0.219952   | 5.17873826 | 5.12817676  | 5.12383807  | 5.63667372 | 5.37640635 | 5.618871    |
| Shad7       | 0.42909741  | 3.52942892 | 0.02165737 | 0.219952   | 3.3993776  | 3.34413141  | 3.20113165  | 3.73025093 | 3.63165613 | 3.87002581  |
| Myof        | 0.41343362  | 4.13060848 | 0.02164736 | 0.219952   | 3.84227608 | 4.07881721  | 3.85013173  | 4.44153054 | 4.34083751 | 4.22960784  |
| Rps15a-ps6  | -0.3856423  | 6.8014788  | 0.02167976 | 0.22008212 | 7.09513574 | 7.007376    | 6.88038816  | 6.79160963 | 6.5936257  | 6.4407376   |
| Ddreb1b     | -0.6137574  | 5.88279243 | 0.0217039  | 0.22008824 | 6.54433923 | 6.04864575  | 5.97602833  | 5.36047618 | 5.81730994 | 5.54995514  |
| Dagi        | 0.38549861  | 5.79520414 | 0.02169663 | 0.22008824 | 5.55991681 | 5.68762671  | 5.55982099  | 6.0120425  | 6.08405033 | 5.86860575  |
| Gtse1       | 0.47439382  | 4.75688478 | 0.02170788 | 0.22008824 | 4.50278514 | 4.60813944  | 4.44813903  | 4.88922985 | 5.41377859 | 4.67923664  |
| multi       | 0.50551295  | 2.95112384 | 0.02171867 | 0.22008824 | 2.79570383 | 2.66015572  | 2.63924255  | 3.70326344 | 2.98254263 | 2.92583488  |
| Snord89     | -0.4088587  | 9.93570741 | 0.02181318 | 0.2206357  | 9.93332514 | 10.0203762  | 10.4467089  | 9.72854335 | 9.49937139 | 9.96591947  |
| Hypk        | -0.4619943  | 7.10789039 | 0.02180525 | 0.2206357  | 7.32514774 | 7.36250047  | 7.32901445  | 6.53222989 | 7.11684965 | 6.96160014  |
| Ndufaf4     | -0.54939959 | 5.24373432 | 0.02179362 | 0.2206357  | 5.15675533 | 5.56614765  | 5.83320989  | 4.34028281 | 5.49563666 | 5.07037361  |
| Zfp276      | -0.3957154  | 5.57412617 | 0.02181804 | 0.2206357  | 5.81903334 | 5.47868503  | 6.01823323  | 5.53032423 | 5.10511374 | 5.49336744  |
| Psmg4       | -0.388654   | 6.99996866 | 0.02182069 | 0.2206357  | 7.07158007 | 6.90916987  | 7.60213704  | 6.58225717 | 6.59696248 | 7.23770529  |
| Gm6455      | 0.45224817  | 3.7758582  | 0.02183599 | 0.22068422 | 3.87391849 | 3.53007073  | 3.24499599  | 4.32731277 | 3.72357831 | 3.95483865  |
| Vdac3       | -0.7261078  | 7.20605901 | 0.02185101 | 0.22077836 | 7.30026275 | 7.25412333  | 8.15294812  | 5.94605145 | 7.19265777 | 7.399030615 |
| Vmn1r208    | 0.76686517  | 3.12141162 | 0.02187195 | 0.22082624 | 2.95445197 | 2.63095227  | 2.60072286  | 3.0887234  | 3.28363339 | 4.11436581  |
| Wdr61       | -0.6106894  | 5.59162277 | 0.02190132 | 0.22096489 | 5.98046229 | 5.75125198  | 5.95918818  | 5.35938769 | 5.64658405 | 4.85286241  |
| Ndufa5      | -0.4079196  | 7.10774608 | 0.02189648 | 0.22096489 | 7.25385641 | 7.33018628  | 7.35107486  | 6.6730946  | 6.95468834 | 7.08357595  |
| Rgl3        | 0.38353515  | 4.82742477 | 0.02192321 | 0.22098261 | 4.64311894 | 4.68020165  | 4.583651    | 5.01167159 | 5.01573603 | 4.94007583  |
| Of1r934     | 0.63318787  | 2.72519595 | 0.02191966 | 0.22098261 | 2.37707033 | 2.50308068  | 2.34565503  | 3.62137682 | 2.7912813  | 2.71271151  |
| Dusp16      | 0.44146457  | 4.20482089 | 0.02193729 | 0.22103671 | 3.9545298  | 4.03578522  | 3.9619508   | 4.27424798 | 4.75158695 | 4.25264462  |
| Mef2d       | -0.4008547  | 7.0344994  | 0.02195994 | 0.22108215 | 7.15923111 | 7.39308641  | 7.2093143   | 6.67920243 | 6.91086054 | 6.96900483  |
| AA543401    | 0.42972677  | 5.06608408 | 0.02196104 | 0.22108215 | 5.11162498 | 4.65123457  | 4.79080255  | 5.77753382 | 5.02390186 | 5.01440673  |
| Mcmdb       | -0.5245196  | 6.86757241 | 0.021988   | 0.22125666 | 7.12907957 | 6.94557621  | 7.31484079  | 6.1653041  | 6.63040665 | 7.02000084  |
| Strip1      | 0.39840805  | 5.96074554 | 0.02202569 | 0.22126731 | 5.74259147 | 5.66009973  | 5.88193334  | 6.0684126  | 6.21098154 | 6.20045455  |
| Arap2       | -0.8475559  | 6.19415546 | 0.02202772 | 0.22126731 | 7.11176409 | 6.51487214  | 6.22716398  | 5.35311553 | 6.21209269 | 5.74592431  |
| Sirt2       | -0.3796908  | 7.04623985 | 0.02199989 | 0.22126731 | 7.13030129 | 7.13362524  | 7.44432919  | 6.79160061 | 6.7214129  | 7.0562341   |
| Mir6239     | 0.46605309  | 6.6487091  | 0.02201719 | 0.22126731 | 6.60686387 | 6.13453528  | 6.50564852  | 7.36523464 | 6.58618081 | 6.69379149  |
| Vmn1r236    | 0.41313007  | 2.44921931 | 0.0220323  | 0.22126731 | 2.13323431 | 2.27341743  | 2.2313107   | 2.62911257 | 2.80462915 | 2.5336113   |
| Arhgap1     | -0.3946405  | 7.45285917 | 0.02203572 | 0.2213657  | 7.64972246 | 7.64989109  | 7.75623466  | 7.19507894 | 7.28697074 | 7.28396714  |
| Cnna2       | -0.5346773  | 7.85664489 | 0.02208165 | 0.22142348 | 8.20953542 | 8.11534224  | 8.04407293  | 7.93120505 | 7.99663898 | 7.4672788   |
| 493340215R  | 0.4030526   | 3.12286814 | 0.02207703 | 0.22142348 | 3.4489709  | 3.26537562  | 3.21967899  | 3.83692597 | 3.52921362 | 3.77704374  |
| Ccd47       | -0.461636   | 5.59772024 | 0.02209201 | 0.22143074 | 5.58971588 | 6.17248771  | 5.72206108  | 5.42645047 | 5.45880573 | 5.21410058  |
| multi       | 0.54379848  | 4.2951235  | 0.02168123 | 0.22168123 | 5.08666717 | 3.45079531  | 3.52921031  | 5.2523279  | 3.94112107 | 4.50741436  |
| Gm3669      | 0.64745759  | 3.82298336 | 0.02214594 | 0.22168123 | 4.1270153  | 3.34353011  | 3.02722828  | 4.31627009 | 3.83735188 | 4.28651431  |
| Psmc5       | -0.3851607  | 7.25244436 | 0.02214413 | 0.22168123 | 7.46877572 | 7.69817716  | 7.16815125  | 7.15492154 | 7.32927246 | 6.59539664  |
| Tand17      | -0.4239117  | 6.22202166 | 0.02216085 | 0.22173394 | 6.22019706 | 6.65928764  | 6.42242089  | 5.75866437 | 6.0543113  | 6.21719485  |
| Trim30a     | -0.7745708  | 7.48721117 | 0.02218206 | 0.22173398 | 8.20581079 | 7.60653035  | 7.8114856   | 6.6808517  | 7.49114671 | 7.1277789   |
| 9330133O14F | -0.4641853  | 5.60731139 | 0.02221081 | 0.22173398 | 5.62914731 | 5.7723191   | 6.11674567  | 5.10145946 | 5.61834313 | 5.40585367  |
| Skz25a16    | -0.7145487  | 5.76093259 | 0.02219048 | 0.22173398 | 6.39574094 | 6.27845477  | 5.68042508  | 4.94986923 | 5.99052877 | 5.27057679  |
| Pafah1b     | -0.6310229  | 7.03452068 | 0.02216048 | 0.22173398 | 7.39914484 | 7.1789375   | 7.47201411  | 6.16005965 | 6.7867743  | 7.2101937   |
| Eif3h       | -0.435609   | 9.73034811 | 0.02219173 | 0.22173398 | 9.77489192 | 9.91605284  | 10.1535313  | 9.14260419 | 9.73105447 | 9.66397488  |
| Wdr33       | -0.3913185  | 6.69855043 | 0.02221924 | 0.22173398 | 6.65139245 | 7.00343821  | 7.02779832  | 6.33316836 | 6.64002154 | 6.51548369  |
| Galt2       | -0.5676253  | 5.23860462 | 0.02224453 | 0.22184919 | 5.50129463 | 5.48253168  | 5.5834255   | 5.4398733  | 5.2159786  | 4.50441001  |
| Phk         | 0.50020009  | 3.74854012 | 0.02224959 | 0.22184919 | 3.51127985 | 3.39286389  | 3.59117648  | 4.38162551 | 3.83542333 | 3.77887146  |
| Nup160      | -0.3907082  | 8.26058718 | 0.02233772 | 0.22228334 | 6.30476666 | 6.51175553  | 6.39578669  | 5.86084545 | 6.24682712 | 5.93252161  |
| D930015E06I | -0.5496471  | 7.3403688  | 0.02231553 | 0.22228334 | 7.48525067 | 7.74220642  | 7.61892991  | 6.45971502 | 7.51274874 | 7.22498206  |
| Arpc4       | -0.4157126  | 5.98943623 | 0.02234839 | 0.22228334 | 6.17746333 | 6.31554976  | 6.09805451  | 5.96253697 | 5.86084785 | 5.52216498  |
| Mir7065     | 1.26184414  | 3.5170301  | 0.02234662 | 0.22228334 | 2.62690115 | 2.35467285  | 2.58076882  | 3.12313125 | 2.92217563 | 5.30256835  |
| Glipr1      | -0.5321117  | 6.34303727 | 0.02235116 | 0.22228334 | 6.33568362 | 6.55012014  | 6.92228566  | 6.01816895 | 6.27785567 | 5.93572955  |
| Capn7       | -0.7102697  | 6.86603066 | 0.02234259 | 0.22228334 | 7.40022502 | 6.97275337  | 7.29043714  | 6.19581974 | 6.97526017 | 6.36152653  |
| Craacr2a    | 0.44786501  | 6.25716338 | 0.02236113 | 0.22228334 | 5.77011305 | 6.10781606  | 6.22176352  | 6.49993612 | 6.48735562 | 6.45581591  |
| Gart        | -0.4564171  | 6.67669559 | 0.02237802 | 0.22235797 | 6.7277808  | 7.0458028   | 6.94112911  | 5.97347402 | 6.65466936 | 6.7172939   |
| Slfrp       | -0.3767371  | 5.63992824 | 0.02242096 | 0.2226884  | 5.87834393 | 5.87916414  | 5.72738228  | 5.51561892 | 5.47883107 | 5.36022907  |
| Cldn34d     | 0.43663592  | 2.6646191  | 0.02248228 | 0.22283831 | 2.41041612 | 2.5597654   | 2.3687219   | 3.03954864 | 2.73662217 | 2.87264038  |
| Sgk1        | -0.4182221  | 5.86642929 | 0.02248453 | 0.22283831 | 6.22203872 | 5.93977878  | 6.0648035   | 5.6184765  | 5.72083517 | 5.63264279  |
| Gm12250     | -0.9628315  | 6.33137153 | 0.02246696 | 0.22283831 | 6.58387502 | 6.79494337  | 7.05954347  | 4.56799259 | 6.55145094 | 6.43042381  |
| Ubez21      | -0.3905158  | 5.83043671 | 0.0224634  | 0.22283831 | 6.0833808  | 6.08312978  | 5.91057326  | 5.56501199 | 5.7565813  | 5.5839431   |
| 6720489N17F | -0.4361561  | 4.41998904 | 0.02244709 | 0.22283831 | 4.45328237 | 4.84559084  | 4.61532804  | 4.22828276 | 4.16079321 | 4.216657    |
| Arhgef6     | -0.6338962  | 6.3203865  | 0.02252209 | 0.22311436 | 6.64460433 | 6.50402316  | 6.76337627  | 5.39077073 | 6.19749269 | 6.42220522  |
| Cops2       | -0.6798684  | 5.52059513 | 0.02254096 | 0.22320502 | 5.49090919 | 6.23145211  | 5.88922677  | 4.59868669 | 5.09047596 | 5.88819888  |
| Gm14325     | -0.5036433  | 6.68387521 | 0.02260257 | 0.22357224 | 6.46202051 | 7.265638204 | 6.95279097  | 6.36481555 | 6.51657113 | 6.27887103  |
| multi       | 1.15739504  | 3.7784714  | 0.02255989 | 0.22357224 | 3.36084514 | 3.22644872  | 3.0102027   | 4.59214928 | 3.19572293 | 5.28363307  |
| Bodl1       | -0.8643227  | 5.90582951 | 0.02262457 | 0.22357224 | 6.31551609 | 6.0387949   | 6.6596616   | 7.83328379 | 6.06860376 | 5.61857692  |
| Rippl1      | 0.38410767  | 4.98337426 | 0.02261794 | 0.22357224 | 4.75716227 | 4.74796396  | 4.86883505  | 5.19834927 | 5.0336678  | 5.29426721  |
| multi       | -1.4428496  | 7.45114436 | 0.02262668 | 0.22357224 | 7.90237639 | 8.54797535  | 8.06735568  | 4.78697342 | 7.70483124 | 7.69735409  |
| Mbnl1       | -0.4953818  | 10.555203  | 0.02267917 | 0.22360426 | 10.681591  | 10.7260075  | 11.0010832  | 9.83927689 | 10.5653623 | 10.5178971  |
| Uba6        | -0.4928842  | 5.17452477 | 0.02270455 | 0.22360426 | 5.7657076  | 5.52534259  | 4.97104048  | 4.89604573 | 5.13590224 | 4.75149001  |
| Vmn1r171    | 0.54208679  | 2.18569746 | 0.02269812 | 0.22360426 | 1.9114239  | 1.89515686  | 1.93766295  | 2.86039757 | 2.01938674 | 2.49043825  |
| Hnrnp1      | -0.3901401  | 7.67828616 | 0.02267584 | 0.22360426 | 7.71243879 | 7.94794739  | 7.9568242   | 7.39177978 | 7.61846144 | 7.43940713  |
| Osgin1      | 0.42861856  | 5.15489211 | 0.02270064 | 0.22360426 | 4.93647392 | 4.88260371  | 5.00267086  | 5.61748399 | 5.17747601 | 5.31264418  |
| 4930579K19F | 0.40466664  | 4.0149325  | 0.02266687 | 0.22360426 | 3.55833909 | 3.85691182  | 4.02254661  | 4.06177612 | 4.34708582 | 4.2429355   |
| Fycod       | -0.4960548  | 6.60326617 | 0.02270776 | 0.22360426 | 6.65686351 | 6.61558528  | 7.28143199  | 6.27686033 | 6.3887516  | 6.40010432  |
| Eif2s1      | -0.6818643  | 5.93487988 | 0.0226655  | 0.22360426 | 6.36074996 | 5.98003517  | 4.848665098 | 5.12428008 | 5.93513796 | 5.72242512  |
| multi       | 1.39557852  | 3.         |            |            |            |             |             |            |            |             |



|            |            |            |            |            |             |             |            |            |             |            |
|------------|------------|------------|------------|------------|-------------|-------------|------------|------------|-------------|------------|
| Mir6398    | 0.40985945 | 4.3587237  | 0.02322473 | 0.22598439 | 4.2205491   | 4.21669518  | 4.02413764 | 4.77758644 | 4.42557244  | 4.4878014  |
| Nat8       | 0.8443893  | 4.00972831 | 0.02323381 | 0.22598439 | 3.87553206  | 3.83255215  | 3.74174323 | 4.16411027 | 4.2136321   | 4.22810096 |
| Wdr44      | -0.4036412 | 5.13934708 | 0.02324445 | 0.22598439 | 5.13540847  | 5.44450846  | 5.44358612 | 4.63706448 | 4.94630772  | 5.2292072  |
| Fam8a1     | -0.7410278 | 5.31739879 | 0.02324095 | 0.22598439 | 5.40144783  | 5.25769308  | 6.4045971  | 4.98815581 | 4.96975071  | 4.88274821 |
| Rpf2       | -0.7305927 | 6.1229783  | 0.02328743 | 0.22621088 | 6.81679269  | 6.61896834  | 6.02906294 | 5.63290531 | 6.65391833  | 6.8622216  |
| Gm3873     | -0.6121732 | 7.29265661 | 0.02328586 | 0.22621088 | 7.57731051  | 7.70525861  | 7.5458747  | 6.38544602 | 7.26693445  | 7.30826199 |
| Mettl5     | 0.39444094 | 5.19943182 | 0.0233122  | 0.22630484 | 4.71435834  | 5.26281398  | 4.76546173 | 5.06376107 | 5.81209708  | 5.31409871 |
| Mir744     | 0.39974634 | 3.58265591 | 0.02331679 | 0.22630484 | 3.40890228  | 3.18150532  | 3.5579406  | 3.98608791 | 3.49572728  | 3.86577203 |
| Epm2aip1   | -0.9487846 | 5.4091453  | 0.02336606 | 0.22666371 | 5.85080954  | 5.69437249  | 6.10543074 | 4.58662377 | 5.7887948   | 4.42884048 |
| Limd2      | -0.3805572 | 6.96515469 | 0.02337349 | 0.22666371 | 7.00670521  | 7.2819068   | 7.18068787 | 6.65175857 | 6.80815836  | 6.86771134 |
| Cxcl7      | 0.42411642 | 5.03056604 | 0.02339728 | 0.2267987  | 4.7859427   | 4.80140383  | 4.86816696 | 5.34902595 | 5.33521467  | 5.04360213 |
| Gm6787     | 0.46354969 | 4.21613927 | 0.02345633 | 0.22727527 | 4.05505622  | 3.91972495  | 3.97831213 | 4.82088947 | 4.09849135  | 4.42436154 |
| Sesn3      | -0.5237795 | 6.98649319 | 0.02349624 | 0.22747009 | 6.73498112  | 7.25874811  | 7.75141959 | 6.32850623 | 7.0515806   | 6.79014605 |
| Mef2c      | -0.3827909 | 4.7242044  | 0.02349464 | 0.22747009 | 4.81284458  | 5.10784073  | 4.82611426 | 4.49730874 | 4.76830147  | 4.33281662 |
| Fzd8       | 0.43543871 | 2.64596498 | 0.02351777 | 0.22758271 | 2.52721282  | 2.31450294  | 2.44302113 | 3.1577405  | 2.82436704  | 2.60894548 |
| Psmc6      | -0.6152838 | 6.48531332 | 0.02354357 | 0.22773647 | 6.71123912  | 7.03444829  | 6.63317821 | 5.6006672  | 6.96370781  | 5.96863927 |
| Bok        | 0.4044692  | 5.6925568  | 0.0236983  | 0.22774535 | 5.59610183  | 5.47333017  | 5.40133459 | 5.85578576 | 6.06733805  | 5.76125038 |
| Dixf1      | 0.4808767  | 5.48199429 | 0.02368428 | 0.22774535 | 5.20634261  | 5.10547583  | 5.4128494  | 5.51454033 | 5.96213833  | 5.69061927 |
| Atp10d     | -0.57341   | 6.89770532 | 0.02359593 | 0.22774535 | 7.4132399   | 6.869946185 | 7.15052921 | 6.48370288 | 6.85280332  | 6.40649478 |
| Ccd3d3     | -0.4348799 | 7.65009209 | 0.02356997 | 0.22774535 | 6.71732271  | 7.25956053  | 6.92571281 | 6.83780464 | 6.60288972  | 6.45726213 |
| Sgcb2b26   | 0.53227974 | 2.99409201 | 0.02366129 | 0.22774535 | 2.68990246  | 2.7529873   | 2.74177665 | 3.56966694 | 2.83885113  | 3.37217756 |
| Ap1m1      | -0.6708885 | 7.58910768 | 0.02361213 | 0.22774535 | 7.85607275  | 7.77019708  | 8.14738591 | 3.74712223 | 5.76688487  | 6.81013324 |
| Bst2       | -0.6050288 | 7.73060882 | 0.02362523 | 0.22774535 | 7.77680096  | 8.07594206  | 8.24662671 | 6.60630303 | 7.89100012  | 7.78697794 |
| Zfp280d    | -0.6388664 | 5.3169978  | 0.02370058 | 0.22774535 | 5.7180952   | 5.69176916  | 5.5056302  | 4.44260162 | 5.2744037   | 5.27756782 |
| Pbdc1      | 0.38618246 | 4.02211298 | 0.02373034 | 0.22774535 | 3.61278137  | 4.24659003  | 3.6277486  | 4.10111986 | 4.65350963  | 3.89098315 |
| multi      | -0.4993246 | 5.65564255 | 0.0237182  | 0.22774535 | 5.89081652  | 5.79893396  | 6.02616407 | 5.07132354 | 5.70910154  | 5.33751569 |
| Pipox      | 0.508908   | 4.49680099 | 0.02367801 | 0.22774535 | 4.18243588  | 4.25734749  | 4.28847261 | 4.76089155 | 5.09489612  | 4.3967262  |
| Smn14      | -0.4148238 | 7.27401624 | 0.0236026  | 0.22774535 | 7.31089385  | 7.6356053   | 7.4977853  | 7.11734601 | 7.06636879  | 7.0160989  |
| Dock9      | -0.458467  | 6.58379969 | 0.02360695 | 0.22774535 | 6.58435188  | 6.93071498  | 6.63403279 | 6.2395577  | 6.3183661   | 6.5057741  |
| Tnfrsf21   | 0.37547012 | 4.69684515 | 0.02367656 | 0.22774535 | 4.21431546  | 4.53059625  | 4.76241857 | 4.63368306 | 4.8572681   | 5.16278947 |
| Tubb6      | 0.40964531 | 5.7314258  | 0.02359422 | 0.22774535 | 5.54800868  | 5.54629015  | 5.4855106  | 6.15405404 | 5.78819208  | 5.86649924 |
| Mir6405    | 0.71838872 | 7.43311727 | 0.02367786 | 0.22774535 | 5.8322226   | 4.79161024  | 4.64692724 | 5.72531368 | 4.75520488  | 5.69641632 |
| Vmn2r40    | 0.37326282 | 2.58360207 | 0.02372013 | 0.22781433 | 2.57407482  | 2.26561349  | 2.35122369 | 2.92715902 | 2.60891694  | 2.77462449 |
| Ddr2       | 0.5145297  | 3.99149584 | 0.02374904 | 0.22799671 | 3.75358183  | 3.70104186  | 3.74806927 | 4.1762415  | 4.63333022  | 3.93671034 |
| Calml4     | 0.09395994 | 3.70502418 | 0.02381188 | 0.22821867 | 3.56146263  | 3.58378748  | 3.35572852 | 3.93719962 | 3.82682703  | 3.96513981 |
| Depn1      | -0.3898969 | 6.26808783 | 0.02380948 | 0.22821867 | 6.03064737  | 6.84033329  | 6.51808759 | 5.56631711 | 6.37600541  | 6.27713618 |
| Gpaal1     | 0.6609595  | 6.10531283 | 0.023788   | 0.22821867 | 5.56968012  | 5.59261436  | 6.14870477 | 6.22969078 | 6.85120419  | 6.21704547 |
| Adamts10   | -0.45108   | 6.69093681 | 0.0238099  | 0.22821867 | 6.97377082  | 6.68210033  | 7.09333964 | 6.29766552 | 6.53655556  | 6.56196926 |
| Itih2b     | -0.396022  | 10.0545507 | 0.02382204 | 0.22822092 | 10.142538   | 10.3198004  | 10.2872467 | 9.60657998 | 10.04066308 | 9.93051027 |
| Morc3      | -0.499058  | 6.27965352 | 0.02385492 | 0.22844066 | 7.02984721  | 6.03304614  | 6.32265422 | 6.12007132 | 5.77080626  | 6.19949095 |
| Stat6      | -0.3247208 | 7.1355647  | 0.02387872 | 0.22852545 | 7.42650887  | 7.4159227   | 7.35134606 | 6.44419056 | 7.09928682  | 7.07613777 |
| Pfkfb3     | -0.4158496 | 7.34115924 | 0.02388366 | 0.22852545 | 7.24861525  | 7.47527706  | 7.92335581 | 6.91498692 | 7.20724707  | 7.27747333 |
| multi      | 0.39652271 | 3.25450668 | 0.02416278 | 0.22875559 | 3.02253606  | 3.11265022  | 3.03398171 | 3.5939711  | 3.39065399  | 3.37411032 |
| Trp        | -0.4940098 | 7.58020456 | 0.0241728  | 0.22875559 | 7.82594403  | 7.89007615  | 7.76560818 | 6.94692406 | 7.69968038  | 7.35299458 |
| Olfr1066   | 0.65132632 | 2.50205425 | 0.02417793 | 0.22875559 | 2.33063136  | 2.04372669  | 2.15481522 | 3.63417997 | 2.26320095  | 2.58573723 |
| Prahc      | -0.3745199 | 7.34980102 | 0.02416944 | 0.22875559 | 7.54136735  | 7.58871177  | 7.48110232 | 7.13822886 | 7.2906638   | 7.05873203 |
| Ndc1       | -0.4273824 | 5.59441478 | 0.02398103 | 0.22875559 | 5.91943183  | 5.67412613  | 5.83075997 | 5.28266886 | 5.49071329  | 5.36878862 |
| Mir7226    | 0.40697117 | 6.48013731 | 0.02397919 | 0.22875559 | 5.60907148  | 6.2369902   | 6.08389351 | 6.73693181 | 6.64010336  | 6.6738335  |
| Gm15800    | -0.4374737 | 6.90360974 | 0.02419636 | 0.22875559 | 6.92552319  | 7.21093206  | 7.2305845  | 6.64030302 | 6.91143602  | 6.50287962 |
| Cdk5       | 0.43632562 | 6.16429907 | 0.02419545 | 0.22875559 | 6.07680803  | 5.99799496  | 5.76433557 | 6.4891653  | 6.19761409  | 6.46060619 |
| DsErdt863e | -0.4108266 | 2.00194504 | 0.02409712 | 0.22875559 | 2.29881879  | 2.23534608  | 2.3579111  | 2.10506662 | 1.75533176  | 1.79919679 |
| Klfb18     | 0.40746844 | 3.48187199 | 0.02415972 | 0.22875559 | 3.36045673  | 3.17037687  | 3.30357972 | 3.75582931 | 3.76796039  | 3.30323234 |
| multi      | 0.94310101 | 4.08690234 | 0.02411227 | 0.22875559 | 4.42985938  | 3.10570476  | 3.1049137  | 4.54159966 | 3.7795304   | 5.25584583 |
| multi      | 0.94310101 | 4.08690234 | 0.02411227 | 0.22875559 | 4.42985938  | 3.10570476  | 3.1049137  | 4.54159966 | 3.7795304   | 5.25584583 |
| Vmn1r175   | 0.68779655 | 2.89606725 | 0.02413636 | 0.22875559 | 2.61227016  | 2.57112845  | 2.47310832 | 4.00546619 | 3.01842185  | 2.69600855 |
| Qrr1       | -0.4323091 | 6.57793644 | 0.02393155 | 0.22875559 | 6.92011861  | 6.75987124  | 6.70180306 | 6.21240938 | 6.4684891   | 6.40324725 |
| Rab8b      | -0.6652541 | 7.03076763 | 0.02394238 | 0.22875559 | 7.32920214  | 7.57498733  | 7.18599461 | 6.6713033  | 6.31551409  | 7.0760432  |
| Otd85      | -0.4360908 | 6.50864665 | 0.02419445 | 0.22875559 | 6.69931165  | 6.69839126  | 6.78237244 | 6.41856661 | 6.39375113  | 6.05948682 |
| Nap1l3     | 0.40767016 | 4.48531844 | 0.02405317 | 0.22875559 | 4.36833752  | 4.32272327  | 4.15338928 | 4.9547305  | 4.54203192  | 4.57069815 |
| Vta1       | -0.690809  | 6.8881725  | 0.02408067 | 0.22875559 | 7.11752567  | 6.42635037  | 6.65890921 | 5.80943522 | 6.36578395  | 5.95331911 |
| Mir7211    | 0.3898796  | 6.47177479 | 0.02404065 | 0.22875559 | 6.31379626  | 6.25981807  | 6.25689064 | 6.855664   | 6.57852249  | 6.56597529 |
| Nts        | 0.41279252 | 3.68929607 | 0.0240516  | 0.22875559 | 3.46701207  | 3.65672677  | 3.42496059 | 4.10095833 | 3.90227363  | 3.68384503 |
| multi      | -2.0907228 | 8.01608038 | 0.02410521 | 0.22875559 | 7.79137131  | 9.1722193   | 10.2207347 | 7.26213823 | 8.03893958  | 5.61107912 |
| Mir103-1   | 0.37350864 | 3.25794567 | 0.02402256 | 0.22875559 | 3.14225046  | 2.9114959   | 3.15982768 | 3.45475273 | 3.2972611   | 3.58208612 |
| Yy1        | -0.5529497 | 7.00244194 | 0.0241749  | 0.22875559 | 7.12499622  | 7.41013892  | 7.30161516 | 7.07970175 | 6.63536845  | 6.46283113 |
| Gm10436    | 0.48461561 | 2.80068363 | 0.02401011 | 0.22875559 | 2.68698882  | 2.38283102  | 2.60530762 | 3.49219449 | 2.52024678  | 3.11653303 |
| Lpar6      | -0.4221981 | 2.75663729 | 0.02401337 | 0.22875559 | 2.90349411  | 2.80527159  | 3.1944433  | 2.49309195 | 2.59417064  | 2.54548124 |
| Gm10375    | 0.38977612 | 3.36739782 | 0.02403959 | 0.22875559 | 3.35810579  | 2.96929263  | 3.19013086 | 3.5988788  | 3.46061162  | 3.62736272 |
| Mir327     | 0.54099492 | 5.46003388 | 0.02397919 | 0.22875559 | 5.40058618  | 5.26160755  | 4.90641552 | 5.93110673 | 5.38609108  | 5.87439925 |
| Mir1941    | 0.49408876 | 4.68628773 | 0.02392104 | 0.22875559 | 4.46581751  | 4.38834578  | 4.46356676 | 5.34201073 | 4.57893767  | 4.87904722 |
| Tdrd6      | 0.4299144  | 3.59953637 | 0.0240066  | 0.22875559 | 3.45516005  | 3.33172583  | 3.36685164 | 3.85641222 | 3.54248961  | 4.04457887 |
| Sleg2      | 0.67112893 | 3.64633443 | 0.02416667 | 0.22885347 | 3.24648706  | 3.39294294  | 3.29289639 | 3.92189637 | 3.46137656  | 4.56242376 |
| Snapc5     | -0.4064608 | 5.42119181 | 0.02423501 | 0.22889722 | 5.372610182 | 6.03177659  | 5.46888825 | 4.85012044 | 5.83580377  | 4.96759995 |
| Gm3244     | -0.4303374 | 4.71748541 | 0.02424121 | 0.22889722 | 4.91957623  | 5.01505736  | 4.86332881 | 4.22864845 | 4.64161908  | 4.63668255 |
| Mia3       | -0.6221921 | 5.60153102 | 0.02426268 | 0.2290058  | 5.97835016  | 6.44372251  | 5.31580859 | 5.3369416  | 5.29432439  | 5.24003888 |
| 039400334  | 3.50752443 | 0.0243118  | 0.22906595 | 3.32647643 | 3.283       |             |            |            |             |            |

Table with multiple columns containing gene identifiers (e.g., Nfat3, Gm20898, Lph) and associated numerical values across various rows, representing supplemental material for a study.

**Table S3. Core enrichment of genes upregulated in T cells during chronic viral infection from GSE30962**

| NAME   | PROBE       | GENE SYM | RANK IN GENE LIST | RANK METRIC SCORE | RUNNING ES  | CORE ENRICHMENT |
|--------|-------------|----------|-------------------|-------------------|-------------|-----------------|
| row_0  | CD81        | CD81     | 143               | 0.788708389       | 0.023867637 | Yes             |
| row_1  | RNF128      | RNF128   | 293               | 0.587954223       | 0.039700214 | Yes             |
| row_2  | CHST2       | CHST2    | 332               | 0.552351296       | 0.059288044 | Yes             |
| row_3  | FABP5       | FABP5    | 353               | 0.535283148       | 0.07904837  | Yes             |
| row_4  | LITAF       | LITAF    | 374               | 0.520645082       | 0.09824305  | Yes             |
| row_5  | MYO1E       | MYO1E    | 383               | 0.518019021       | 0.117890954 | Yes             |
| row_6  | IFITM3      | IFITM3   | 435               | 0.483742893       | 0.13422664  | Yes             |
| row_7  | PLOD2       | PLOD2    | 455               | 0.473976046       | 0.15166411  | Yes             |
| row_8  | CXCL10      | CXCL10   | 508               | 0.443830013       | 0.1664112   | Yes             |
| row_9  | AKR1E1      | null     | 553               | 0.426394045       | 0.18085435  | Yes             |
| row_10 | FCER1G      | FCER1G   | 585               | 0.410784006       | 0.1952952   | Yes             |
| row_11 | EHD4        | EHD4     | 745               | 0.355614156       | 0.20168725  | Yes             |
| row_12 | TPD52       | TPD52    | 899               | 0.313978702       | 0.20674774  | Yes             |
| row_13 | MEF2C       | MEF2C    | 912               | 0.311119944       | 0.21821557  | Yes             |
| row_14 | CTLA4       | CTLA4    | 924               | 0.306608945       | 0.22955532  | Yes             |
| row_15 | DUSP4       | DUSP4    | 925               | 0.305872947       | 0.24137512  | Yes             |
| row_16 | KIF4        | null     | 1012              | 0.287171423       | 0.24849682  | Yes             |
| row_17 | 1500009L16R | null     | 1085              | 0.274209321       | 0.25576478  | Yes             |
| row_18 | XCL1        | XCL1     | 1142              | 0.267048329       | 0.26349565  | Yes             |
| row_19 | ST14        | ST14     | 1215              | 0.255814731       | 0.2700528   | Yes             |
| row_20 | FLNB        | FLNB     | 1275              | 0.245914012       | 0.2768283   | Yes             |
| row_21 | NDRG1       | NDRG1    | 1276              | 0.245886594       | 0.28633004  | Yes             |
| row_22 | AIM2        | AIM2     | 1342              | 0.236681789       | 0.2924714   | Yes             |
| row_23 | TXNDC12     | TXNDC12  | 1432              | 0.224031731       | 0.29701453  | Yes             |
| row_24 | SERPINE2    | SERPINE2 | 1477              | 0.218334422       | 0.30341768  | Yes             |
| row_25 | MELK        | MELK     | 1509              | 0.214980364       | 0.31029212  | Yes             |
| row_26 | NAPSA       | NAPSA    | 1588              | 0.20547235        | 0.31462654  | Yes             |
| row_27 | ETV5        | ETV5     | 1589              | 0.205449611       | 0.3225657   | Yes             |
| row_28 | SKAP2       | SKAP2    | 1598              | 0.20454134        | 0.33009994  | Yes             |
| row_29 | STARD3NL    | STARD3NL | 1612              | 0.203077421       | 0.3373465   | Yes             |
| row_30 | OPTN        | OPTN     | 1629              | 0.201732829       | 0.3444024   | Yes             |
| row_31 | SPATS2      | SPATS2   | 1644              | 0.201107264       | 0.3515266   | Yes             |
| row_32 | SLC37A2     | SLC37A2  | 1656              | 0.200336292       | 0.35875967  | Yes             |
| row_33 | EGR2        | EGR2     | 1725              | 0.19406867        | 0.36311567  | Yes             |
| row_34 | TOX         | TOX      | 1760              | 0.190972939       | 0.36892375  | Yes             |
| row_35 | GCA         | GCA      | 1763              | 0.19081451        | 0.3762049   | Yes             |
| row_36 | HELLS       | HELLS    | 1804              | 0.186518192       | 0.38156345  | Yes             |
| row_37 | STAU2       | STAU2    | 1805              | 0.186458766       | 0.38876873  | Yes             |
| row_38 | SNX9        | SNX9     | 1845              | 0.182801962       | 0.39402992  | Yes             |
| row_39 | HMGN3       | HMGN3    | 1887              | 0.17864272        | 0.39903793  | Yes             |
| row_40 | 1700017B05R | null     | 1949              | 0.17451556        | 0.40296194  | Yes             |
| row_41 | KIFAP3      | KIFAP3   | 2184              | 0.159593657       | 0.39831227  | Yes             |
| row_42 | PDCD1       | PDCD1    | 2194              | 0.159010082       | 0.40404084  | Yes             |
| row_43 | DYNLT3      | DYNLT3   | 2615              | 0.135916874       | 0.38987827  | Yes             |
| row_44 | PCTP        | PCTP     | 2618              | 0.135798112       | 0.39503345  | Yes             |
| row_45 | SYPL        | null     | 2661              | 0.13373816        | 0.39825997  | Yes             |
| row_46 | CD83        | CD83     | 2701              | 0.132024661       | 0.40155897  | Yes             |
| row_47 | LPGAT1      | LPGAT1   | 2809              | 0.127385706       | 0.40153536  | Yes             |
| row_48 | MPP6        | MPP6     | 2852              | 0.12545298        | 0.40444174  | Yes             |
| row_49 | CRMP1       | CRMP1    | 3087              | 0.116527557       | 0.39812788  | No              |
| row_50 | HOOK1       | HOOK1    | 3096              | 0.116295762       | 0.40225208  | No              |
| row_51 | TACC2       | TACC2    | 3246              | 0.110521235       | 0.39963531  | No              |
| row_52 | ART3        | ART3     | 3286              | 0.108761556       | 0.40203536  | No              |
| row_53 | CORO2A      | CORO2A   | 3395              | 0.10516201        | 0.40110675  | No              |
| row_54 | GCSH        | GCSH     | 3621              | 0.09756241        | 0.39447606  | No              |
| row_55 | IPP         | IPP      | 3644              | 0.096573584       | 0.39719096  | No              |
| row_56 | UHRF1       | UHRF1    | 3740              | 0.094913788       | 0.39646727  | No              |
| row_57 | ST6GAL1     | ST6GAL1  | 3748              | 0.094715051       | 0.39980373  | No              |
| row_58 | CPTA        | CPTA     | 3864              | 0.091409805       | 0.39802325  | No              |
| row_59 | DIAPH3      | DIAPH3   | 4095              | 0.085591979       | 0.39066885  | No              |
| row_60 | RBMXL1      | RBMXL1   | 4238              | 0.082113199       | 0.38730788  | No              |
| row_61 | TNFRSF9     | TNFRSF9  | 4260              | 0.081447192       | 0.3894845   | No              |
| row_62 | CHEK1       | CHEK1    | 4267              | 0.081323855       | 0.39234972  | No              |
| row_63 | PTGER2      | PTGER2   | 4322              | 0.080156609       | 0.392951    | No              |
| row_64 | SEMA4C      | SEMA4C   | 4336              | 0.079862513       | 0.3954362   | No              |
| row_65 | FILIP1      | FILIP1   | 4379              | 0.078901418       | 0.39654368  | No              |
| row_66 | BCAT1       | BCAT1    | 4393              | 0.078339875       | 0.39897004  | No              |
| row_67 | TOX2        | null     | 4640              | 0.073210351       | 0.39042756  | No              |
| row_68 | MAD2L1      | MAD2L1   | 4701              | 0.071906097       | 0.3904327   | No              |
| row_69 | IRF8        | IRF8     | 4735              | 0.071188562       | 0.39165816  | No              |
| row_70 | RTP4        | RTP4     | 4926              | 0.06682568        | 0.3854576   | No              |
| row_71 | TBC1D31     | null     | 4945              | 0.066384465       | 0.38719085  | No              |
| row_72 | BCL3        | BCL3     | 4994              | 0.065594196       | 0.38750675  | No              |
| row_73 | CASP3       | CASP3    | 5034              | 0.06483534        | 0.38820937  | No              |
| row_74 | ADK         | ADK      | 5104              | 0.063290566       | 0.3874655   | No              |
| row_75 | FIGNL1      | FIGNL1   | 5345              | 0.059111893       | 0.3786556   | No              |
| row_76 | UBASH3B     | null     | 5348              | 0.059059516       | 0.38084537  | No              |
| row_77 | LAG3        | LAG3     | 5409              | 0.057852533       | 0.38030744  | No              |
| row_78 | RG810       | RG810    | 5472              | 0.056633797       | 0.3796299   | No              |
| row_79 | PSMC3IP     | PSMC3IP  | 5620              | 0.054102976       | 0.37492543  | No              |
| row_80 | PSMD12      | PSMD12   | 5671              | 0.053257149       | 0.37467217  | No              |
| row_81 | JAZF1       | JAZF1    | 5856              | 0.050037898       | 0.36810026  | No              |
| row_82 | FRMD4A      | FRMD4A   | 5869              | 0.049828779       | 0.36947107  | No              |
| row_83 | ZFP518B     | null     | 5918              | 0.049007364       | 0.36914602  | No              |
| row_84 | SYNPO       | SYNPO    | 5976              | 0.048015259       | 0.3683666   | No              |
| row_85 | BLM         | BLM      | 5992              | 0.047784936       | 0.36951974  | No              |
| row_86 | SLC25A13    | SLC25A13 | 6105              | 0.045985505       | 0.36611947  | No              |
| row_87 | GAS2        | GAS2     | 6160              | 0.044889849       | 0.36535797  | No              |
| row_88 | BM11        | BM11     | 6446              | 0.040717669       | 0.35375708  | No              |
| row_89 | CTPS        | CTPS     | 6514              | 0.039709996       | 0.3521945   | No              |
| row_90 | GLDC        | GLDC     | 6582              | 0.038782518       | 0.35059604  | No              |
| row_91 | TFDP1       | TFDP1    | 6763              | 0.036386296       | 0.34368148  | No              |
| row_92 | PHLPP1      | null     | 6812              | 0.035817001       | 0.34284672  | No              |

|         |            |           |       |              |               |    |
|---------|------------|-----------|-------|--------------|---------------|----|
| row_93  | FANCD2     | FANCD2    | 6847  | 0.035394736  | 0.34264278    | No |
| row_94  | SET        | SET       | 7289  | 0.029634673  | 0.32340243    | No |
| row_95  | ZAN        | ZAN       | 7678  | 0.024675181  | 0.3064204     | No |
| row_96  | MAP2       | MAP2      | 8223  | 0.018318336  | 0.2819815     | No |
| row_97  | CCDC58     | CCDC58    | 8229  | 0.018250661  | 0.28245562    | No |
| row_98  | HAT1       | HAT1      | 8251  | 0.017884035  | 0.282176      | No |
| row_99  | PEX11A     | PEX11A    | 8377  | 0.01641323   | 0.27703202    | No |
| row_100 | PSAT1      | PSAT1     | 8561  | 0.014527083  | 0.2691341     | No |
| row_101 | NRGN       | NRGN      | 8787  | 0.011874858  | 0.2591922     | No |
| row_102 | NCF1       | NCF1      | 9148  | 0.00800042   | 0.24286011    | No |
| row_103 | HSPA9      | null      | 9513  | 0.004469261  | 0.22620668    | No |
| row_104 | TARSL2     | TARSL2    | 9541  | 0.004291567  | 0.22512442    | No |
| row_105 | SPOCK2     | SPOCK2    | 9765  | 0.001790189  | 0.21488526    | No |
| row_106 | CDK2AP1    | CDK2AP1   | 9835  | 0.001228117  | 0.21174316    | No |
| row_107 | RAD51      | RAD51     | 10210 | -0.002779731 | 0.19456217    | No |
| row_108 | KPNA2      | KPNA2     | 10363 | -0.004479499 | 0.18770897    | No |
| row_109 | RANBP1     | RANBP1    | 10929 | -0.010450421 | 0.16199529    | No |
| row_110 | TMM8A1     | null      | 11203 | -0.013607582 | 0.14990152    | No |
| row_111 | TFDP2      | TFDP2     | 11408 | -0.015561066 | 0.14107281    | No |
| row_112 | NEK2       | NEK2      | 11520 | -0.016735945 | 0.13658848    | No |
| row_113 | BST2       | BST2      | 11641 | -0.017723316 | 0.13172628    | No |
| row_114 | FAM81A     | FAM81A    | 11891 | -0.020231085 | 0.120997876   | No |
| row_115 | FAXC       | null      | 11910 | -0.020456402 | 0.12095631    | No |
| row_116 | GMPS       | GMPS      | 11930 | -0.020692367 | 0.12087763    | No |
| row_117 | GCNT1      | GCNT1     | 12233 | -0.02346704  | 0.10782431    | No |
| row_118 | FEN1       | FEN1      | 12322 | -0.024240831 | 0.10469318    | No |
| row_119 | SMCO4      | null      | 12495 | -0.026680506 | 0.097750194   | No |
| row_120 | DDIT4      | DDIT4     | 12745 | -0.028753988 | 0.08735136    | No |
| row_121 | CCNA2      | CCNA2     | 12821 | -0.029574137 | 0.08502704    | No |
| row_122 | PAQR4      | PAQR4     | 13026 | -0.031806529 | 0.076826096   | No |
| row_123 | CDC27      | CDC27     | 13073 | -0.032357648 | 0.0759501     | No |
| row_124 | PSPC1      | PSPC1     | 13268 | -0.034558382 | 0.068317756   | No |
| row_125 | RNASEH2B   | RNASEH2B  | 13460 | -0.03682059  | 0.060911503   | No |
| row_126 | DUT        | DUT       | 13715 | -0.040185392 | 0.05072306    | No |
| row_127 | PLK4       | PLK4      | 13731 | -0.040487185 | 0.051594213   | No |
| row_128 | UMPS       | UMPS      | 13964 | -0.043420583 | 0.04254775    | No |
| row_129 | CDK6       | CDK6      | 14252 | -0.047032036 | 0.031098433   | No |
| row_130 | RAD54L     | RAD54L    | 14563 | -0.050888006 | 0.01873493    | No |
| row_131 | RFC4       | RFC4      | 14923 | -0.055749577 | 0.004294234   | No |
| row_132 | C1QBP      | C1QBP     | 15003 | -0.056659386 | 0.002831884   | No |
| row_133 | SLC6A13    | SLC6A13   | 15103 | -0.057834409 | 4.90E-04      | No |
| row_134 | SMYD2      | SMYD2     | 15215 | -0.059191868 | -0.002353284  | No |
| row_135 | INPP4B     | INPP4B    | 15379 | -0.061632875 | -0.007506401  | No |
| row_136 | KNSTRN     | null      | 15568 | -0.064132407 | -0.013718571  | No |
| row_137 | CDC6       | CDC6      | 15706 | -0.066028103 | -0.017499976  | No |
| row_138 | MBOAT7     | null      | 15729 | -0.066303179 | -0.0159548    | No |
| row_139 | VAMP5      | VAMP5     | 15771 | -0.066803232 | -0.015268588  | No |
| row_140 | NAA50      | null      | 15815 | -0.067361638 | -0.01465325   | No |
| row_141 | EIF1AX     | EIF1AX    | 16101 | -0.071481541 | -0.025063318  | No |
| row_142 | SPAG5      | SPAG5     | 16212 | -0.073044844 | -0.027327485  | No |
| row_143 | ID3        | ID3       | 16213 | -0.073046513 | -0.0245504762 | No |
| row_144 | SGOL1      | SGOL1     | 16236 | -0.073405765 | -0.022685122  | No |
| row_145 | HMGB3      | HMGB3     | 16277 | -0.073860519 | -0.021679971  | No |
| row_146 | MIS18BP1   | null      | 16324 | -0.074683577 | -0.02092037   | No |
| row_147 | MMD        | MMD       | 16343 | -0.07593657  | -0.018832808  | No |
| row_148 | ARHGAP11A  | ARHGAP11A | 16517 | -0.077457324 | -0.02385668   | No |
| row_149 | PCGF5      | PCGF5     | 16535 | -0.077724546 | -0.021639021  | No |
| row_150 | CDC14A     | CDC14A    | 16714 | -0.080415443 | -0.026759712  | No |
| row_151 | MTHFD2     | MTHFD2    | 16887 | -0.083300948 | -0.031491544  | No |
| row_152 | CELF2      | null      | 16961 | -0.084579408 | -0.021539783  | No |
| row_153 | SPC25      | null      | 16974 | -0.084705472 | -0.028879432  | No |
| row_154 | CCR9       | CCR9      | 17023 | -0.085403867 | -0.02779802   | No |
| row_155 | SHCBP1     | SHCBP1    | 17102 | -0.086864851 | -0.02804692   | No |
| row_156 | CBLB       | CBLB      | 17111 | -0.086967006 | -0.025056075  | No |
| row_157 | FKBP5      | FKBP5     | 17161 | -0.08763057  | -0.023934843  | No |
| row_158 | NOF58      | null      | 17180 | -0.087956049 | -0.021368036  | No |
| row_159 | TRIP13     | TRIP13    | 17250 | -0.089578286 | -0.02109605   | No |
| row_160 | IL21       | IL21      | 17596 | -0.095047253 | -0.03334783   | No |
| row_161 | OXSRI      | OXSRI     | 17688 | -0.097402319 | -0.033790465  | No |
| row_162 | PWP1       | PWP1      | 17984 | -0.103131004 | -0.04344177   | No |
| row_163 | CEP128     | null      | 18098 | -0.105763197 | -0.04457828   | No |
| row_164 | CMSS1      | null      | 18102 | -0.105841771 | -0.040626936  | No |
| row_165 | RAD18      | RAD18     | 18342 | -0.110826619 | -0.04739222   | No |
| row_166 | CCNB2      | CCNB2     | 18353 | -0.110970825 | -0.043566253  | No |
| row_167 | SUV39H1    | SUV39H1   | 18532 | -0.115568578 | -0.047328528  | No |
| row_168 | SRFBP1     | SRFBP1    | 18829 | -0.122851729 | -0.05626399   | No |
| row_169 | KIF22      | KIF22     | 19233 | -0.133842841 | -0.06972087   | No |
| row_170 | D630039A03 | null      | 19370 | -0.13816537  | -0.07066847   | No |
| row_171 | RSAD2      | RSAD2     | 19385 | -0.138496354 | -0.06596374   | No |
| row_172 | MYC        | MYC       | 19432 | -0.140184641 | -0.06267299   | No |
| row_173 | UTP6       | UTP6      | 19669 | -0.14874281  | -0.06783441   | No |
| row_174 | LAP3       | LAP3      | 19685 | -0.14901194  | -0.062769555  | No |
| row_175 | BCAP29     | BCAP29    | 19717 | -0.149685889 | -0.058418266  | No |
| row_176 | TAMM41     | null      | 19781 | -0.152065039 | -0.055454265  | No |
| row_177 | UCHL5      | UCHL5     | 20134 | -0.165736809 | -0.06532116   | No |
| row_178 | CENPK      | CENPK     | 20180 | -0.167912632 | -0.060912706  | No |
| row_179 | TFRC       | TFRC      | 20212 | -0.169425488 | -0.055798624  | No |
| row_180 | ATAD5      | null      | 20260 | -0.172003865 | -0.05132452   | No |
| row_181 | DTL        | DTL       | 20394 | -0.178101346 | -0.0505902    | No |
| row_182 | ITM2A      | ITM2A     | 20665 | -0.194680586 | -0.055548124  | No |
| row_183 | BUB1       | BUB1      | 20790 | -0.203643084 | -0.05341077   | No |
| row_184 | NANP       | NANP      | 20923 | -0.214303672 | -0.051231258  | No |
| row_185 | CENPP      | CENPP     | 20945 | -0.215845704 | -0.04386113   | No |
| row_186 | RCS1       | RCS1      | 21015 | -0.222257361 | -0.03846204   | No |
| row_187 | HSH2D      | HSH2D     | 21033 | -0.223787621 | -0.030600091  | No |

|         |        |        |       |              |              |    |
|---------|--------|--------|-------|--------------|--------------|----|
| row_188 | NCAPG2 | NCAPG2 | 21082 | -0.227634519 | -0.024022488 | No |
| row_189 | XRCC2  | XRCC2  | 21380 | -0.267074287 | -0.027431011 | No |
| row_190 | CKAP2  | CKAP2  | 21392 | -0.269400865 | -0.017529089 | No |
| row_191 | CD160  | CD160  | 21520 | -0.296975434 | -0.011923784 | No |
| row_192 | EXO1   | EXO1   | 21597 | -0.320878863 | -0.003037275 | No |
| row_193 | MYB    | MYB    | 21647 | -0.351337463 | 0.008274333  | No |

Table S4. Genes differentially expressed between splenic TCRmsn cells isolated from control or anti-PD-L1 treated mice at day 8 post T cell transfer; all genes p&lt;0.15, adj

| SYMBOL       | logFC      | AveExpr    | P.Value    | adj.P.Val  | Ig1_D8_KI196_D8_KI220_D8_KI223_D8_KI49_Spl_10.L43_Spl_10.I00_Spl_1045 |
|--------------|------------|------------|------------|------------|-----------------------------------------------------------------------|
| multi        | 1.15353571 | 4.74650047 | 0.00031779 | 0.14015611 | 5.32738812                                                            |
| H2aIe        | 1.08023055 | 4.72563803 | 0.00037253 | 0.14015611 | 5.32299227                                                            |
| multi        | 0.91286631 | 4.68304304 | 0.00085192 | 0.14892009 | 5.20634734                                                            |
| H2ahIh       | 0.76112859 | 4.65176204 | 0.00061994 | 0.14015611 | 4.85559366                                                            |
| H2ahIj       | 0.75392658 | 4.11158109 | 0.00056194 | 0.14015611 | 4.62823012                                                            |
| H2ahIh       | 0.63584909 | 2.76256461 | 0.00037921 | 0.14015611 | 2.93022836                                                            |
| Zfp869       | -0.5442501 | 5.65120049 | 0.00058641 | 0.14015611 | 5.38706511                                                            |
| Dhx30        | -0.5466128 | 6.0877352  | 0.00075616 | 0.14632304 | 5.90985465                                                            |
| Phb          | -0.5565766 | 8.00463717 | 0.00069039 | 0.14235925 | 7.90789895                                                            |
| Vdact        | -0.5835737 | 5.5583909  | 0.00044083 | 0.14015611 | 5.38389691                                                            |
| Mmaa         | -0.584755  | 4.73290662 | 0.00082812 | 0.14892009 | 4.54596239                                                            |
| Mtor         | -0.6085743 | 6.05367666 | 0.0006777  | 0.14235925 | 5.79026994                                                            |
| 2410131K14Ri | -0.6171553 | 5.46503537 | 0.00038821 | 0.14015611 | 5.21828127                                                            |
| Trmt61a      | -0.6238488 | 6.17031234 | 0.00054049 | 0.14015611 | 5.92889417                                                            |
| Gtfa2a       | -0.6530109 | 4.81048012 | 0.000403   | 0.14015611 | 4.40627192                                                            |
| Acp3         | -0.662681  | 7.39424681 | 0.00012653 | 0.11556834 | 7.04371042                                                            |
| Kif1bp       | -0.6698053 | 5.18923561 | 0.00085436 | 0.14892009 | 5.00300805                                                            |
| Vps4b        | -0.6720331 | 6.13204672 | 0.00069881 | 0.14235925 | 5.82128737                                                            |
| Cpm          | -0.6760431 | 4.94191656 | 0.00040858 | 0.14015611 | 4.83227124                                                            |
| Phtfi        | -0.6763263 | 5.62371455 | 0.00071479 | 0.14317032 | 5.35913693                                                            |
| Wdsu1b       | -0.6817497 | 4.54132685 | 0.00084772 | 0.14892009 | 4.18279938                                                            |
| Rsl24d1      | -0.6886007 | 5.75538554 | 0.00069921 | 0.14235925 | 5.36385211                                                            |
| Cyp4f13      | -0.6985961 | 5.45855924 | 0.00074118 | 0.14589771 | 5.14779953                                                            |
| Acp1         | -0.6996726 | 5.52055276 | 9.35E-05   | 0.09699695 | 5.17608332                                                            |
| Spat5        | -0.7046147 | 5.04555932 | 0.00059776 | 0.14015611 | 4.74667712                                                            |
| Lypd6b       | -0.7133563 | 5.81456131 | 0.00046373 | 0.14015611 | 5.26339104                                                            |
| Mbtpr1       | -0.7211963 | 6.09202386 | 0.00021751 | 0.14015611 | 5.88257793                                                            |
| Gbp3         | -0.741997  | 5.75755607 | 0.0006745  | 0.14235925 | 5.62115305                                                            |
| multi        | -0.743586  | 5.165676   | 0.00073935 | 0.14589771 | 4.9757869                                                             |
| Focad        | -0.7480737 | 5.41178123 | 0.00067737 | 0.14235925 | 5.28848178                                                            |
| Vepkmt       | -0.7524356 | 4.25398702 | 0.00041    | 0.14015611 | 4.06707377                                                            |
| 2610044O15F  | -0.7653429 | 5.75047951 | 0.00042557 | 0.14015611 | 5.65256416                                                            |
| AWO46200     | -0.7679933 | 3.96541418 | 0.00031078 | 0.14015611 | 3.39368935                                                            |
| Heatr1       | -0.7731405 | 6.0647771  | 0.00068284 | 0.14235925 | 5.60313245                                                            |
| Vipr1        | -0.7731746 | 5.09257937 | 0.0003072  | 0.14015611 | 4.85367509                                                            |
| Ints3        | -0.7764404 | 6.53653625 | 0.00045232 | 0.14015611 | 6.19961634                                                            |
| Opai1        | -0.7797655 | 4.88233758 | 0.00066218 | 0.14235925 | 4.81949077                                                            |
| Rcd1         | -0.7810319 | 5.17465092 | 0.00049322 | 0.14015611 | 4.82578084                                                            |
| CenpQ        | -0.7937095 | 4.12205271 | 0.00035181 | 0.14015611 | 3.93938382                                                            |
| Cox18        | -0.7943848 | 5.86545387 | 0.00027675 | 0.14015611 | 5.57265098                                                            |
| Aprmap       | -0.7954571 | 4.98462285 | 0.00056885 | 0.14015611 | 4.8154527                                                             |
| Rce1         | -0.7994713 | 5.73136565 | 0.00039102 | 0.14015611 | 5.33301259                                                            |
| Mbtd1        | -0.8010273 | 5.57823982 | 0.00057495 | 0.14015611 | 5.41014562                                                            |
| Trip12       | -0.8075125 | 7.27472291 | 0.00084251 | 0.14892009 | 6.86488091                                                            |
| Chmp7        | -0.812517  | 6.05672548 | 0.00033715 | 0.14015611 | 5.64930545                                                            |
| Pikfyve      | -0.8298965 | 4.67946528 | 0.00080737 | 0.14892009 | 4.21324047                                                            |
| Brwd1        | -0.8327028 | 5.26012729 | 0.00031807 | 0.14015611 | 4.84557024                                                            |
| Cd55         | -0.8338557 | 6.68449841 | 0.00059984 | 0.14015611 | 6.16145967                                                            |
| Lmtk2        | -0.8367941 | 6.03286288 | 0.0001152  | 0.11436803 | 5.81348535                                                            |
| Mprl9        | -0.840849  | 6.22284662 | 0.0007045  | 0.14235925 | 6.00149599                                                            |
| Dpp4         | -0.8549263 | 6.35512868 | 0.00018335 | 0.14015611 | 5.89115102                                                            |
| Rev1         | -0.863468  | 5.02541237 | 2.47E-05   | 0.08239061 | 4.58044331                                                            |
| Idnk         | -0.8697692 | 8.28514411 | 3.32E-05   | 0.08239061 | 7.93737058                                                            |
| Znhit6       | -0.871139  | 5.7219404  | 0.00061817 | 0.14015611 | 5.47242853                                                            |
| Trim44       | -0.8871433 | 6.38045415 | 0.0006028  | 0.14015611 | 6.08045075                                                            |
| Mrops1       | -0.8958343 | 5.1058787  | 0.00024459 | 0.14015611 | 4.50219992                                                            |
| 9930021J03F  | -0.9065357 | 4.5479452  | 0.00038313 | 0.14015611 | 4.20880076                                                            |
| Gm11423      | -0.9075723 | 4.84978812 | 0.0005596  | 0.14015611 | 4.50803634                                                            |
| Cdc25a       | -0.9095355 | 5.12651935 | 8.03E-05   | 0.09167689 | 4.67405425                                                            |
| Ttded23      | -0.9159261 | 5.05339353 | 0.00041241 | 0.14015611 | 4.44871489                                                            |
| Atad2b       | -0.9216397 | 6.09412076 | 0.00029088 | 0.14015611 | 5.57545164                                                            |
| Letm1        | -0.9255353 | 6.05882856 | 0.00078226 | 0.14885097 | 5.54824397                                                            |
| Pum3         | -0.9269321 | 6.93733192 | 0.00018693 | 0.14015611 | 6.49607026                                                            |
| Vps41        | -0.9302037 | 5.48434549 | 0.0004407  | 0.14015611 | 5.32916291                                                            |

|             |            |            |            |            |            |            |            |            |            |            |             |
|-------------|------------|------------|------------|------------|------------|------------|------------|------------|------------|------------|-------------|
| 150001K16Ri | -0.9340471 | 5.4741173  | 0.00050946 | 0.14015611 | 5.30474713 | 5.12362231 | 4.84149791 | 5.02537832 | 5.74150579 | 6.20179557 | 6.08027405  |
| Rrad        | -0.9429447 | 5.42399497 | 0.00082885 | 0.14892009 | 4.83818118 | 4.85275614 | 5.13489308 | 5.25362677 | 5.75495685 | 5.84958467 | 6.2839201   |
| Pspect      | -0.9477451 | 5.47582335 | 0.00028488 | 0.14015611 | 4.77551116 | 5.21910996 | 5.15926517 | 5.12470126 | 6.2002124  | 5.99640548 | 5.85555801  |
| Zfp72       | -0.9481133 | 4.49133709 | 0.00054274 | 0.14015611 | 4.13295946 | 4.04456987 | 4.21777747 | 3.94470393 | 4.66814474 | 5.24120027 | 5.19000341  |
| Hdac8       | -0.9585293 | 5.56048351 | 0.00055736 | 0.14015611 | 5.34131604 | 5.15017432 | 4.73994705 | 5.36730346 | 6.13054129 | 6.09873053 | 6.09537186  |
| Ddx60       | -0.9702117 | 4.57027963 | 1.45E-05   | 0.08239061 | 4.15138548 | 4.04102912 | 4.23152366 | 4.19396011 | 5.1768548  | 5.09117059 | 5.10603363  |
| Dgkl        | -0.9707319 | 6.59708377 | 0.00076812 | 0.14738915 | 6.38384356 | 5.9956541  | 5.86540341 | 6.47932216 | 7.17092441 | 7.00796487 | 7.27647388  |
| Mospd2      | -0.9745831 | 4.41989807 | 0.00083624 | 0.14892009 | 3.86075465 | 3.93077198 | 3.98622585 | 4.23112586 | 4.68999903 | 4.88150777 | 5.35890136  |
| Fam49a      | -0.9790258 | 7.26503552 | 0.00033474 | 0.14015611 | 6.90090981 | 6.62173789 | 6.68535897 | 7.17380556 | 7.95757254 | 7.76954801 | 7.7463159   |
| Yaed1       | -1.0001129 | 4.35344974 | 0.00046677 | 0.14015611 | 4.09457403 | 3.8276341  | 3.89154084 | 3.88557071 | 4.54988053 | 5.18465254 | 5.04037066  |
| Ermpp1      | -1.0061541 | 5.66419309 | 3.78E-05   | 0.08239061 | 5.33861506 | 5.1941077  | 5.1479861  | 5.25122791 | 6.30310283 | 6.05308623 | 6.3612258   |
| Abtb2       | -1.010268  | 6.04806177 | 2.17E-05   | 0.08239061 | 5.49156757 | 5.54979359 | 5.64277117 | 5.77622665 | 6.66297476 | 6.636189   | 6.57909962  |
| Wdr48       | -1.0117974 | 6.49444076 | 0.00032237 | 0.14015611 | 5.97432315 | 5.94422814 | 5.97238107 | 6.35231881 | 7.33600578 | 6.86208503 | 7.01974133  |
| Ythdc2      | -1.0141585 | 4.38200142 | 0.00020449 | 0.14015611 | 4.21570493 | 3.62946257 | 4.02091369 | 3.9233671  | 4.9290703  | 4.91376669 | 5.04172463  |
| Emf4        | -1.0247071 | 6.41173487 | 6.42E-05   | 0.08416141 | 5.99474706 | 6.11781656 | 5.77089537 | 6.00683976 | 7.11361491 | 6.82569327 | 7.05253718  |
| Gm7160      | -1.035212  | 6.00028813 | 0.00036008 | 0.14015611 | 5.54467473 | 5.17405154 | 5.64652098 | 5.86845608 | 6.65172859 | 6.54665348 | 6.58253149  |
| Ssh2        | -1.0391774 | 6.49655102 | 0.00033234 | 0.14015611 | 6.05159178 | 5.88722152 | 5.8224842  | 6.44346177 | 7.02669739 | 7.2003333  | 7.0440694   |
| Oasia       | -1.0644318 | 5.8155562  | 0.00075579 | 0.14632304 | 5.41452401 | 5.37921488 | 5.42074301 | 5.2230026  | 6.3654258  | 6.03656908 | 6.86941401  |
| Sclt82a2    | -1.0746074 | 7.92557202 | 0.0005425  | 0.14015611 | 7.71585856 | 7.26769529 | 7.1949791  | 7.68157109 | 8.80833367 | 8.48239471 | 8.33267175  |
| Mu2         | -1.0789687 | 5.0729095  | 0.00083681 | 0.14892009 | 4.99785878 | 4.95556711 | 4.31337332 | 4.63517809 | 5.86436583 | 5.36899672 | 5.83562667  |
| Ifi80       | -1.0814055 | 4.92457586 | 5.50E-05   | 0.08368593 | 4.33877126 | 4.57641841 | 4.5262723  | 4.4030034  | 5.5357664  | 5.74454906 | 5.32943993  |
| Klf3        | -1.0903815 | 6.95811736 | 0.00060774 | 0.14015611 | 6.66035031 | 6.74698965 | 6.18733857 | 6.36856545 | 7.90670614 | 7.47578503 | 7.361108636 |
| Lclat1      | -1.0947622 | 5.74132062 | 1.26E-05   | 0.08239061 | 5.37274884 | 5.22110894 | 5.15135096 | 5.34333847 | 6.26177784 | 6.44779609 | 6.3911232   |
| Lrp6        | -1.1123874 | 5.80043204 | 0.00068936 | 0.14235925 | 5.316393   | 5.67254355 | 5.44347959 | 4.86236218 | 6.24202054 | 6.52022067 | 6.54600471  |
| Gtf2e1      | -1.1169502 | 5.86158042 | 8.57E-05   | 0.093238   | 5.50108408 | 5.53067594 | 5.05489835 | 5.44489147 | 6.6180939  | 6.41880884 | 6.46261036  |
| Pde2a       | -1.1188717 | 7.82742657 | 6.00E-05   | 0.08416141 | 7.57108749 | 7.35277999 | 7.10480448 | 7.36296828 | 8.46113392 | 8.60051341 | 8.33869811  |
| Trim30a     | -1.1445904 | 7.36007164 | 0.0002241  | 0.14015611 | 7.12266567 | 6.56425653 | 6.84970444 | 6.94150488 | 8.2867968  | 7.84802463 | 7.90754854  |
| Cnnt8       | -1.1481732 | 6.79738162 | 4.33E-05   | 0.08239061 | 6.38520506 | 6.09497634 | 6.2607251  | 6.48032209 | 7.57857391 | 7.50556934 | 7.27629859  |
| Eef1e1      | -1.1541791 | 6.78893335 | 0.00012448 | 0.11556834 | 6.26735867 | 6.38278844 | 6.00531413 | 6.52167945 | 7.26874532 | 7.6567938  | 7.41985363  |
| Arta2-ps    | -1.157535  | 5.20164577 | 0.00032559 | 0.14015611 | 5.06912866 | 4.59844138 | 4.79573116 | 4.3589362  | 6.04678256 | 5.83763907 | 5.70486134  |
| Cmah        | -1.1697802 | 7.5970996  | 0.00053562 | 0.14015611 | 7.20755247 | 6.86166323 | 6.86530513 | 7.44854013 | 8.35001895 | 8.50566895 | 7.94094835  |
| Pus3        | -1.1710864 | 5.15964026 | 0.00019176 | 0.14015611 | 4.8573727  | 4.39856166 | 4.53531985 | 4.83973012 | 5.86049527 | 6.05646406 | 5.56953819  |
| Atp8a1      | -1.1860161 | 5.68472784 | 0.00036626 | 0.14015611 | 4.95395351 | 5.23235945 | 5.12287697 | 5.39655105 | 6.05227455 | 6.76362783 | 6.27145154  |
| Mis12       | -1.1990383 | 5.65067209 | 4.17E-05   | 0.08239061 | 4.97907472 | 5.37313613 | 4.9483391  | 5.24664424 | 6.3575387  | 6.22104942 | 6.42892236  |
| Wdr5b       | -1.2266707 | 5.14362221 | 0.00049673 | 0.14015611 | 5.05073354 | 4.25566535 | 4.72833314 | 4.43689269 | 5.78787606 | 5.66820839 | 6.07764632  |
| Mu81        | -1.2420203 | 6.11385773 | 0.00035593 | 0.14015611 | 5.58588452 | 5.98586827 | 5.2299884  | 5.52354209 | 6.75386186 | 7.09476337 | 6.62213021  |
| Ccnh        | -1.2429177 | 5.5311151  | 4.70E-05   | 0.0826398  | 5.12507899 | 4.98655897 | 4.82008966 | 5.0620024  | 6.35844467 | 6.4127079  | 5.95289794  |
| Ttc32       | -1.2489133 | 4.39915455 | 0.00066567 | 0.14235925 | 3.60784406 | 3.69212636 | 3.86027381 | 4.2953798  | 4.82480397 | 5.00915066 | 5.50450317  |
| Left1       | -1.251732  | 7.1244656  | 0.00013912 | 0.12217582 | 6.90929945 | 6.49330355 | 6.24626568 | 6.70316737 | 7.75417661 | 8.01452398 | 7.75052256  |
| 4930594C11R | -1.2612517 | 4.72865959 | 7.32E-05   | 0.08797542 | 4.24579496 | 3.92007709 | 4.30858618 | 4.27803442 | 5.25152995 | 5.73423445 | 5.36236006  |
| Gm10933     | -1.2728456 | 3.97469143 | 0.00021445 | 0.14015611 | 3.44039369 | 3.69286848 | 3.20332582 | 3.38015674 | 4.6876133  | 4.36735027 | 5.0511317   |
| Enpp4       | -1.2758844 | 5.45700492 | 0.00061308 | 0.14015611 | 4.44584405 | 5.18855222 | 4.99770401 | 5.00868903 | 6.59566481 | 6.09544601 | 5.99313434  |
| Gm614       | -1.3135608 | 5.67947779 | 0.00042897 | 0.14015611 | 5.23206278 | 5.59576362 | 5.01148679 | 4.62677946 | 6.50320478 | 6.41985241 | 6.3671947   |
| Clec2i      | -1.3415308 | 6.50198958 | 0.00059589 | 0.14015611 | 6.49676663 | 5.74666078 | 5.53483532 | 5.92992847 | 7.50998039 | 7.14173183 | 7.15402366  |
| Eomes       | -1.3556221 | 6.75324825 | 0.00068304 | 0.14235925 | 6.07158415 | 6.38163801 | 5.69914907 | 6.53669809 | 7.73789628 | 7.71306097 | 7.13271114  |
| Rragb       | -1.3608184 | 4.58997368 | 0.00029716 | 0.14015611 | 4.09125968 | 4.30045438 | 3.78229231 | 3.85305684 | 4.93186403 | 5.69600315 | 5.47488534  |
| Rnf122      | -1.3742924 | 5.3331324  | 0.00060749 | 0.14015611 | 4.4226663  | 4.78778371 | 5.20899306 | 4.55715676 | 5.69889514 | 6.23647299 | 6.41995882  |
| Fam208b     | -1.381601  | 6.72982811 | 0.00061796 | 0.14015611 | 5.96185024 | 6.47084682 | 5.56734856 | 6.55082798 | 7.59297476 | 7.5214046  | 7.44356384  |
| Ms44c       | -1.3821745 | 8.45389258 | 0.00021035 | 0.14015611 | 8.17032463 | 8.00628533 | 7.35992973 | 7.90958867 | 9.20461062 | 9.43935557 | 9.08715348  |
| Sle35a1     | -1.4008587 | 6.6516921  | 0.00061293 | 0.14015611 | 5.58603918 | 6.13590625 | 5.92559961 | 6.55775123 | 7.48568071 | 7.14367627 | 7.72719143  |
| E330033B04  | -1.5358783 | 5.2068637  | 5.33E-05   | 0.08368593 | 4.56502419 | 4.96903455 | 4.42627143 | 4.23374038 | 5.91051671 | 6.16416541 | 6.17884323  |
|             | -1.586715  | 7.61961298 | 0.00054351 | 0.14015611 | 7.27176607 | 7.35365307 | 6.19367758 | 6.9388623  | 8.5030934  | 8.59428811 | 8.48154035  |
| Gm14085     | -1.6223429 | 6.78762404 | 2.16E-05   | 0.08239061 | 6.21851185 | 5.8813287  | 5.84209794 | 6.42739836 | 7.58164746 | 7.86091914 | 7.70146486  |
| Gm8369      | -1.8332902 | 5.99436606 | 0.00059105 | 0.14015611 | 5.87114509 | 5.06169462 | 4.4742053  | 5.4276361  | 7.17701228 | 7.2184765  | 6.73039253  |
| Samd3       | -1.8760076 | 6.36991693 | 0.0002325  | 0.14015611 | 5.65009589 | 6.05276425 | 5.03907183 | 5.52172276 | 7.9090862  | 7.37871203 | 7.03796556  |
| Cxcr4       | -1.9599219 | 8.0289034  | 0.00051595 | 0.14015611 | 7.32245425 | 6.7981398  | 6.8348478  | 7.80030569 | 9.13431761 | 8.58829932 | 9.72395931  |
| Snord49b    | -2.0451924 | 6.86731004 | 0.0003373  | 0.14015611 | 5.64658786 | 6.00062167 | 5.59063799 | 6.72534857 | 8.37150334 | 8.22755193 | 7.50891892  |
| Snord70     | -2.2010339 | 3.85334075 | 0.0008082  | 0.14892009 | 2.65662913 | 3.06736024 | 2.00091003 | 3.91526283 | 5.12578543 | 5.23864518 | 4.96871144  |
| Slamf6      | -2.2793428 | 6.74275109 | 3.53E-06   | 0.0805193  | 6.00051941 | 5.90494965 | 5.82896478 | 5.32912567 | 8.20945592 | 8.082180   | 7.84413424  |
| Sell        | -2.287136  | 8.69472344 | 0.00032165 | 0.14015611 | 8.16194623 | 8.33687971 | 6.97718931 | 7.38207397 | 9.55444006 | 10.3086549 | 10.14188    |
| Ilf6        | -2.2928371 | 6.46891141 | 0.00037856 | 0.14015611 | 5.66862417 | 6.25078016 | 4.4436346  | 4.49254192 | 7.755789   | 8.59320915 | 8.07780089  |
| Airt2b      | -2.9902055 | 5.44329895 | 3.33E-05   | 0.08239061 | 4.52440008 | 3.27978623 | 4.19151912 | 4.65142378 | 7.13162709 | 7.45331239 | 6.86902394  |
| Snord92     | -3.0639505 | 4.57172995 | 6.63E-05   | 0.08416141 | 4.15179236 | 2.73412845 | 3.56411739 | 2.58439508 | 6.29704799 | 6.56786068 | 6.10276769  |
| Snord98     | -3.1536749 | 3.80132292 | 3.28E-05   | 0.08239061 | 2.4825271  | 2.36402408 | 3.1343861  | 1.81805452 | 5.33383819 | 6.23281459 | 5.2436159   |

Table S5. Genes differentially expressed in splenic TCRmsn cells +/- anti-PD-L1 at day 28, genes shown are Adj. p<0.10

| SYMBOL      | logFC      | AveExpr    | P.Value    | adj.P.Val  | I254_D28_K1284_PC_Spleen_Donor | I119_D28_1045_T_cell | I131_D28_1045_T_cell | I59_D28_1045_T_cell |
|-------------|------------|------------|------------|------------|--------------------------------|----------------------|----------------------|---------------------|
| Olfir93     | 1.41018442 | 3.09731752 | 3.27E-05   | 0.06907166 | 3.939552308                    | 3.947304037          | 2.60949845           | 2.49063265          |
| Olfir282    | 1.16586574 | 3.72197746 | 0.0001313  | 0.0804808  | 4.453285642                    | 4.389708164          | 3.35848971           | 3.25038649          |
| Neurod2     | 1.0507386  | 4.31598747 | 0.00021199 | 0.09066972 | 4.991956693                    | 4.90090457           | 3.79117529           | 3.9473089           |
| Swal3       | 1.01912042 | 2.78338887 | 0.00028471 | 0.0958629  | 3.3494196258                   | 3.44022598           | 2.45903504           | 2.25947446          |
| Magea8      | 0.96432675 | 4.33028478 | 0.00024317 | 0.09066972 | 4.92697775                     | 4.890783875          | 3.8637597            | 3.97142047          |
| Nme8        | 0.8825913  | 3.30163252 | 0.00023261 | 0.09720855 | 3.777843174                    | 3.884456826          | 2.94793568           | 2.935599            |
| Secr6a      | -0.892509  | 6.0966275  | 0.00025088 | 0.09066972 | 5.5591716                      | 5.563073041          | 6.46978046           | 6.44211551          |
| Atrx        | -0.9549158 | 6.36543444 | 0.00021631 | 0.09066972 | 5.801596083                    | 5.783373868          | 6.70095369           | 6.80519155          |
| Rhm39       | -0.9745026 | 7.76410092 | 0.00028471 | 0.0958629  | 7.21916958                     | 7.139629144          | 8.09209706           | 8.25120338          |
| Tgds        | -1.0066076 | 4.86461546 | 0.00025102 | 0.09066972 | 4.293838316                    | 4.227463244          | 5.31727591           | 5.16173436          |
| Tmem181a    | -1.0291011 | 6.68515932 | 0.00024011 | 0.09066972 | 5.998423323                    | 6.136974004          | 7.10983473           | 7.16573494          |
| Mkl2        | -1.0349965 | 5.88178497 | 0.00031338 | 0.09720855 | 5.260787057                    | 5.260787057          | 6.17067418           | 6.42495114          |
| Nsaa2       | -1.0614289 | 7.72865274 | 0.00018349 | 0.08552826 | 7.148159494                    | 7.035431282          | 8.13923724           | 8.087149            |
| Zfp280d     | -1.076409  | 5.3711662  | 0.00030577 | 0.09720855 | 4.636313697                    | 4.814327919          | 5.83272239           | 5.89149372          |
| Birc3       | -1.0865467 | 5.96321623 | 0.00011625 | 0.07908753 | 5.291250338                    | 5.331326137          | 6.33822739           | 6.41041059          |
| Pa2g4       | -1.0952417 | 7.78587827 | 0.00012572 | 0.0804808  | 7.081404334                    | 7.176062114          | 8.18669563           | 8.28570745          |
| mult1       | -1.1132573 | 6.3911221  | 0.00021854 | 0.09066972 | 5.654335802                    | 5.791796642          | 6.71267183           | 6.89016695          |
| mult2       | -1.1208287 | 7.39726113 | 0.00018489 | 0.08552826 | 6.830787704                    | 6.618740079          | 7.82993177           | 7.80587942          |
| Bdpl        | -1.1230396 | 6.15270067 | 0.00015673 | 0.08430592 | 5.377036985                    | 5.580716843          | 6.60195642           | 6.57987743          |
| Cybb5b      | -1.1235912 | 6.3029135  | 0.0002319  | 0.09066972 | 5.727167835                    | 5.530349772          | 6.66208476           | 6.84891017          |
| Brd9        | -1.1640097 | 5.9199081  | 0.00029156 | 0.09633978 | 5.102968113                    | 5.340036476          | 6.39154439           | 6.26621382          |
| Cd22        | -1.1667943 | 7.77388288 | 0.00019657 | 0.08915192 | 4.96425115                     | 5.183361511          | 6.14838027           | 6.30998796          |
| 993011J21R1 | -1.1698527 | 5.28504197 | 0.00090501 | 0.07699484 | 6.652403024                    | 6.513857702          | 7.79638928           | 7.69418826          |
| Uhapl1      | -1.198654  | 6.7098478  | 0.0003214  | 0.09720855 | 5.843132167                    | 6.138178615          | 7.08925047           | 7.30736454          |
| Polr2g      | -1.1999349 | 7.15387539 | 0.0001066  | 0.07699484 | 6.395394628                    | 6.472434404          | 7.66825367           | 7.52932031          |
| Ebf1        | -1.2044026 | 5.34768276 | 6.44E-05   | 0.06907166 | 4.618918732                    | 4.631594858          | 5.88136513           | 5.78462225          |
| Rnf41       | -1.2044028 | 5.87126775 | 0.00019085 | 0.07699484 | 5.057162001                    | 5.240090095          | 6.30634801           | 6.40548093          |
| Snw1        | -1.246116  | 6.61975342 | 0.00025079 | 0.09066972 | 5.761589865                    | 5.982577757          | 7.28119363           | 7.05444294          |
| Cdca4       | -1.2597659 | 6.39072266 | 0.00023575 | 0.09066972 | 5.490511104                    | 5.779215086          | 6.92661099           | 6.77542336          |
| Sfc39a6     | -1.2687943 | 6.3049648  | 9.79E-05   | 0.07699484 | 5.476823887                    | 5.610551557          | 6.88774882           | 6.70529935          |
| Ardc1       | -1.2722563 | 6.93304222 | 0.00026266 | 0.09205019 | 6.355873782                    | 5.983503084          | 7.48238164           | 7.39621662          |
| Exll3       | -1.2871634 | 6.36895883 | 0.00025379 | 0.09066972 | 5.438783051                    | 5.754353858          | 6.93301025           | 6.9615947           |
| Snrp2b      | -1.2925515 | 5.52694914 | 9.93E-05   | 0.07699484 | 4.713620245                    | 4.785659998          | 5.92838437           | 6.16922858          |
| Plk2        | -1.2989041 | 5.88275062 | 5.49E-05   | 0.06907166 | 5.052612109                    | 5.154204292          | 6.44978983           | 6.41619664          |
| Cul4b       | -1.2992437 | 4.94099064 | 6.96E-05   | 0.06907166 | 4.078002507                    | 4.244886365          | 5.42507519           | 5.5203394           |
| Zw10        | -1.3082527 | 6.21862729 | 5.93E-05   | 0.06907166 | 5.35203803                     | 5.515314466          | 6.74031304           | 6.77307624          |
| Tm9sf3      | -1.3089522 | 6.09222607 | 0.0002348  | 0.09066972 | 5.112431546                    | 5.103147174          | 6.5713662            | 6.6599149           |
| Nelf1b      | -1.364766  | 6.79766765 | 5.70E-05   | 0.06907166 | 6.040356745                    | 5.91725929           | 7.43492037           | 7.27547402          |
| Elp2        | -1.3832351 | 6.36321213 | 0.0001357  | 0.08090931 | 5.708547272                    | 5.357855829          | 6.89557034           | 6.94996833          |
| Soat1       | -1.3860953 | 6.3765224  | 0.00014073 | 0.08090931 | 5.452930362                    | 5.636287396          | 6.80229021           | 7.09785318          |
| Katzb       | -1.4131812 | 6.1365885  | 9.96E-05   | 0.07699484 | 5.158671986                    | 5.418680581          | 6.807009             | 6.6370664           |
| Pxk         | -1.4151186 | 7.16756314 | 9.02E-05   | 0.07699484 | 6.261430688                    | 6.375553306          | 7.77985196           | 7.57489991          |
| Nup14       | -1.4401699 | 6.60073437 | 4.40E-05   | 0.06907166 | 5.647041283                    | 5.826223599          | 7.11733365           | 7.22052817          |
| Rras2       | -1.445922  | 6.81264527 | 0.0001718  | 0.08552826 | 5.795448648                    | 6.09473554           | 7.30861849           | 7.30791997          |
| Acpp        | -1.4470425 | 4.91956335 | 5.53E-05   | 0.06907166 | 4.040065427                    | 4.02610204           | 5.3850257            | 5.47937557          |
| Dars        | -1.4507735 | 6.9433965  | 7.17E-05   | 0.06907166 | 6.000012315                    | 6.145789515          | 7.66117393           | 7.41616277          |
| Impdh2      | -1.4598693 | 6.43787017 | 0.00030365 | 0.09720855 | 5.33750798                     | 5.786389194          | 6.89820741           | 7.03358205          |
| Zfp871      | -1.4706881 | 6.89200382 | 0.00020642 | 0.09066972 | 5.783542519                    | 6.2356394            | 7.46911026           | 7.50550542          |
| Vps25       | -1.47633   | 7.37054076 | 0.00013455 | 0.0804808  | 6.29573596                     | 6.673749508          | 7.99159124           | 7.89673328          |
| Rnf2        | -1.4919741 | 5.95562368 | 0.00023654 | 0.09066972 | 5.160901536                    | 4.959976876          | 6.56372543           | 6.32591605          |
| BC147527    | -1.5176039 | 5.0324657  | 0.0001357  | 0.0804808  | 4.047980318                    | 4.19582528           | 5.41835057           | 5.71756023          |
| Fam91a1     | -1.5538684 | 5.44094088 | 0.00017304 | 0.08552826 | 4.483641161                    | 4.533598481          | 6.21805931           | 5.79421187          |
| Erich1      | -1.5942094 | 6.03856453 | 0.00017574 | 0.08552826 | 4.86965819                     | 5.294419641          | 6.80722715           | 6.65911787          |
| Zc3h6       | -1.6388948 | 5.03148923 | 2.87E-05   | 0.06907166 | 4.11009556                     | 3.986209178          | 5.63091751           | 5.62001409          |
| E430025E211 | -1.6446957 | 5.82307078 | 0.00031763 | 0.09720855 | 5.117026143                    | 4.555480606          | 6.42601097           | 6.39923697          |
| Apoahp      | -1.6473144 | 7.02684936 | 0.00017633 | 0.08552826 | 5.815229436                    | 6.261692013          | 7.68230282           | 7.81779331          |
| Deaf5       | -1.6538745 | 7.03581324 | 0.00012503 | 0.0804808  | 5.932003085                    | 6.154974038          | 7.72309654           | 7.48000061          |
| Fcho2       | -1.6599717 | 6.22701519 | 0.00010395 | 0.07699484 | 5.225434338                    | 5.236630017          | 6.63516688           | 7.02461568          |
| 4930594C11R | -1.6622983 | 4.94660468 | 0.00021248 | 0.09720855 | 3.751192457                    | 4.147258947          | 5.50476733           | 5.88537724          |
| Elm02       | -1.7322825 | 6.50756662 | 3.34E-05   | 0.06907166 | 5.327546038                    | 5.608848191          | 7.13569982           | 7.1964983           |
| Gli1        | -1.7651729 | 6.28064217 | 6.19E-05   | 0.06907166 | 5.289683333                    | 5.15339351           | 6.90738344           | 6.84354974          |
| Arm08       | -1.8118986 | 5.81399051 | 4.22E-05   | 0.06907166 | 4.702622411                    | 4.751080317          | 6.71042157           | 6.33858326          |
| Jak2        | -1.8621651 | 5.95579549 | 1.19E-05   | 0.06183338 | 4.786528988                    | 4.890463912          | 6.64644927           | 6.80772143          |
| A230046K03  | -1.8883967 | 5.79591076 | 3.54E-05   | 0.06907166 | 4.700615328                    | 4.625103153          | 6.67274049           | 6.33482699          |
| Rictor      | -1.8940835 | 6.4287427  | 7.51E-05   | 0.06948903 | 5.379958203                    | 5.204626985          | 7.42734107           | 7.16617711          |
| Ubl7        | -1.9355422 | 6.24959794 | 1.95E-05   | 0.06450362 | 5.024685642                    | 5.15185956           | 7.07031074           | 7.14007201          |
| Taf4b       | -2.0747844 | 5.33432359 | 1.16E-05   | 0.06183338 | 4.011049406                    | 4.167861129          | 6.14958836           | 6.0474858           |
| Emsy        | -2.1155702 | 6.35709518 | 1.46E-05   | 0.06183338 | 4.958692152                    | 5.216813923          | 7.16342652           | 7.32943213          |
| Mhlp        | -2.3278435 | 5.57287251 | 1.60E-05   | 0.06183338 | 4.193802519                    | 4.158530289          | 6.26436091           | 6.58102254          |
| Capn7       | -2.3490582 | 6.39186075 | 0.00015227 | 0.08385645 | 4.623633112                    | 5.34119851           | 7.49703715           | 7.14900486          |
| Ids         | -2.4968429 | 6.03684351 | 0.00017952 | 0.08552826 | 4.789540909                    | 4.28793462           | 7.0093589            | 7.1682516           |
| Gm20274     | -2.5868639 | 5.99001302 | 3.87E-05   | 0.06907166 | 4.185986292                    | 4.689803123          | 7.25390848           | 6.89073057          |
| Stap1       | -2.8630152 | 6.36477511 | 7.16E-05   | 0.06907166 | 4.288897193                    | 5.005034786          | 7.27310237           | 7.5330864           |
| Snord104    | -2.9641701 | 5.68726965 | 6.20E-05   | 0.06907166 | 3.690405368                    | 4.127129814          | 6.45249967           | 7.12745937          |
| Snord72     | -3.8411817 | 4.64819234 | 3.33E-06   | 0.06183338 | 2.232728189                    | 2.454238468          | 6.15792009           | 6.46509342          |



**Table S6. Differentially expressed genes between intratumoral TCRmsln cells post anti-PD-L1 at day 8; genes shown are p<0.05 (Adj)**

| SYMBOL     | logFC      | AveExpr    | P.Value    | adj.P.Val  | m1 anti-PD1 | m2 anti-PD1 | m3 anti-PD1 | m4 anti-PD1 | m1 control | m2 control | m3 control |
|------------|------------|------------|------------|------------|-------------|-------------|-------------|-------------|------------|------------|------------|
| multi      | 4.28293598 | 6.88520589 | 0.00021898 | 0.02537506 | 9.83666211  | 7.45157427  | 9.46984367  | 8.1249195   | 4.73549007 | 3.32399234 | 5.2539593  |
| multi      | 4.28293598 | 6.88520589 | 0.00021898 | 0.02537506 | 9.83666211  | 7.45157427  | 9.46984367  | 8.1249195   | 4.73549007 | 3.32399234 | 5.2539593  |
| Snord16l2  | 4.28293598 | 6.88520589 | 0.00021898 | 0.02537506 | 9.83666211  | 7.45157427  | 9.46984367  | 8.1249195   | 4.73549007 | 3.32399234 | 5.2539593  |
| Snord16l1  | 4.28293598 | 6.88520589 | 0.00021898 | 0.02537506 | 9.83666211  | 7.45157427  | 9.46984367  | 8.1249195   | 4.73549007 | 3.32399234 | 5.2539593  |
| multi      | 3.56271038 | 5.41633178 | 0.00085807 | 0.03877405 | 8.26643071  | 5.66685001  | 8.02142798  | 5.87812194  | 3.73282566 | 3.38904825 | 3.01961791 |
| Olfr194    | 3.55280526 | 5.16341339 | 0.00019726 | 0.02537506 | 7.56336319  | 5.68159139  | 7.38476931  | 6.11445295  | 2.6131263  | 2.76096624 | 4.02562432 |
| Gm10922    | 3.5159096  | 5.08423945 | 0.00024318 | 0.02635243 | 7.7971073   | 5.56411042  | 7.32453747  | 5.67847621  | 3.3150258  | 2.95182158 | 2.95859739 |
| Gm2825     | 3.51080901 | 5.21229879 | 0.00039159 | 0.02891443 | 7.92974292  | 5.59663729  | 7.58984383  | 5.75150083  | 3.51022317 | 3.18041531 | 2.92728214 |
| Gm10921    | 3.4996718  | 4.96884422 | 0.0004889  | 0.0318348  | 7.81842116  | 5.34057762  | 7.26646395  | 5.44935152  | 3.24992464 | 2.88035502 | 2.77681563 |
| multi      | 3.47763351 | 4.97202038 | 0.0004786  | 0.03158954 | 7.6797517   | 5.32525663  | 7.41701148  | 5.42771914  | 3.14463557 | 2.93980249 | 2.86996563 |
| Rnu6       | 3.44372147 | 6.05792137 | 0.00032894 | 0.02842636 | 8.54007795  | 7.28338273  | 8.08380462  | 6.22794989  | 3.57877198 | 4.93745309 | 3.75402191 |
| multi      | 3.33515959 | 6.62885446 | 0.00011618 | 0.02162389 | 9.1336521   | 7.3721833   | 8.56460879  | 7.1623901   | 4.82720796 | 4.41866795 | 4.92326925 |
| multi      | 3.33449738 | 6.39359469 | 3.68E-05   | 0.02005732 | 8.62832767  | 7.41670062  | 8.11473961  | 7.13089207  | 3.84954144 | 4.75273313 | 4.86222827 |
| multi      | 3.33449738 | 6.39359469 | 3.68E-05   | 0.02005732 | 8.62832767  | 7.41670062  | 8.11473961  | 7.13089207  | 3.84954144 | 4.75273313 | 4.86222827 |
| multi      | 3.32045658 | 5.38306326 | 0.00035897 | 0.02891443 | 7.99761311  | 5.93689858  | 7.54046745  | 5.74948795  | 3.76326125 | 3.67613193 | 3.21758531 |
| Gm8693     | 3.31825395 | 5.93226348 | 9.32E-05   | 0.02078215 | 8.40075006  | 6.64991959  | 7.87386546  | 6.49295417  | 4.1076341  | 3.94233471 | 4.05838628 |
| Igk        | 3.26690309 | 5.83789785 | 0.00183204 | 0.0491209  | 8.54914212  | 5.72255352  | 7.55892545  | 7.12139331  | 5.23366199 | 3.50631587 | 3.17331038 |
| Vmn1r151   | 3.26574561 | 5.19206066 | 0.00021892 | 0.02537506 | 7.74385431  | 5.50462413  | 7.15580077  | 5.96238448  | 3.46059967 | 3.11432228 | 3.40328988 |
| multi      | 3.2620877  | 6.62302345 | 0.00021723 | 0.02537506 | 9.1490242   | 7.05651781  | 8.59541359  | 7.28332454  | 4.92223713 | 4.39450801 | 4.96020187 |
| multi      | 3.2620877  | 6.62302345 | 0.00021723 | 0.02537506 | 9.1490242   | 7.05651781  | 8.59541359  | 7.28332454  | 4.92223713 | 4.39450801 | 4.96020187 |
| Gm2012     | 3.25760642 | 5.91694449 | 3.88E-05   | 0.02005732 | 8.12484646  | 7.05813418  | 7.63616746  | 6.433098    | 3.59019324 | 4.26620335 | 4.30996873 |
| multi      | 3.24626631 | 5.20649407 | 0.00044786 | 0.03083274 | 7.77247953  | 5.44827587  | 7.39572135  | 5.7742575   | 3.594318   | 3.31118098 | 3.20384148 |
| multi      | 3.2427791  | 5.35053696 | 0.00022088 | 0.0254686  | 8.73175632  | 5.85955238  | 7.36593068  | 5.90395835  | 3.82484798 | 3.46549276 | 3.20222027 |
| Vmn1r127   | 3.2258196  | 5.7423007  | 7.29E-05   | 0.02078215 | 8.20041298  | 6.49765271  | 7.45831369  | 6.34290678  | 3.85466827 | 3.84424779 | 3.99790269 |
| multi      | 3.22294666 | 6.62510614 | 0.00024489 | 0.02641592 | 9.15056423  | 7.00875164  | 8.56780869  | 7.29835142  | 4.97853773 | 4.42224259 | 4.94948668 |
| Gm7391     | 3.21788753 | 6.2578756  | 5.16E-05   | 0.02078215 | 8.48852166  | 7.15176305  | 8.03707714  | 6.87416699  | 3.9393793  | 4.66785996 | 4.65238436 |
| multi      | 3.21380624 | 6.42459476 | 3.32E-05   | 0.02005732 | 8.59670706  | 7.43183246  | 8.09322052  | 7.08600112  | 4.05913973 | 4.86699719 | 4.83826524 |
| Vmn1r122   | 3.2115851  | 5.50218914 | 0.00010249 | 0.02104276 | 7.99468039  | 6.8189796   | 7.25596032  | 6.07579269  | 3.72490249 | 3.86788516 | 3.64420531 |
| multi      | 3.20995915 | 6.40618984 | 3.14E-05   | 0.02005732 | 8.54406444  | 7.49178115  | 8.07779608  | 7.01390481  | 4.06970473 | 4.69607127 | 4.95000642 |
| multi      | 3.1871219  | 6.45519938 | 0.00011466 | 0.02162389 | 8.83959624  | 7.16774256  | 8.34404023  | 6.93285203  | 4.67042566 | 4.48939105 | 4.74198787 |
| multi      | 3.1871219  | 6.45519938 | 0.00011466 | 0.02162389 | 8.83959624  | 7.16774256  | 8.34404023  | 6.93285203  | 4.67042566 | 4.48939105 | 4.74198787 |
| multi      | 3.1871219  | 6.45519938 | 0.00011466 | 0.02162389 | 8.83959624  | 7.16774256  | 8.34404023  | 6.93285203  | 4.67042566 | 4.48939105 | 4.74198787 |
| multi      | 3.17623804 | 5.24570158 | 9.23E-05   | 0.02078215 | 7.63877253  | 5.96900876  | 7.04284905  | 5.77167668  | 3.45043134 | 3.33597144 | 3.50572247 |
| multi      | 3.16449685 | 6.3694912  | 2.87E-05   | 0.02005732 | 8.53191213  | 7.40977415  | 7.99943889  | 6.96169138  | 4.16749081 | 4.68056879 | 4.93556224 |
| multi      | 3.16436947 | 6.22838439 | 3.32E-05   | 0.02005732 | 8.36418509  | 7.28119181  | 7.86425732  | 6.82860872  | 3.96846711 | 4.4568823  | 4.83517038 |
| multi      | 3.1617647  | 6.97391343 | 0.00187535 | 0.04943283 | 9.2021497   | 6.74486024  | 9.66925077  | 7.49971597  | 5.34661705 | 5.00705341 | 5.14788159 |
| Vmn1r159   | 3.15851172 | 5.73494382 | 8.18E-05   | 0.02078215 | 7.97184096  | 6.86851619  | 7.48415068  | 6.02985896  | 3.83305138 | 3.70930984 | 4.24787873 |
| Igk        | 3.15566964 | 6.71624226 | 7.04E-06   | 0.02005732 | 8.36341442  | 8.16084082  | 8.02841468  | 7.72201852  | 5.64075816 | 4.37932956 | 4.71891969 |
| multi      | 3.14129863 | 5.48932018 | 9.90E-05   | 0.02078215 | 7.94895957  | 6.21914794  | 7.26627034  | 6.00835013  | 3.68111898 | 3.47949166 | 3.92226652 |
| multi      | 3.13810002 | 5.76005489 | 8.73E-05   | 0.02078215 | 8.16838486  | 6.50570532  | 7.4328565   | 6.31292435  | 3.89567331 | 3.84893711 | 4.15590279 |
| multi      | 3.13810002 | 5.76005489 | 8.73E-05   | 0.02078215 | 8.16838486  | 6.50570532  | 7.4328565   | 6.31292435  | 3.89567331 | 3.84893711 | 4.15590279 |
| multi      | 3.13348517 | 6.32726905 | 3.78E-05   | 0.02005732 | 8.50303115  | 7.29192233  | 7.93910079  | 6.94671079  | 4.06970473 | 4.78160196 | 4.75881161 |
| multi      | 3.12670813 | 5.36854432 | 0.00011594 | 0.02162389 | 7.73403264  | 6.07819071  | 7.14810327  | 5.87392174  | 3.63139058 | 3.30655532 | 3.80761597 |
| multi      | 3.12227072 | 5.76580154 | 4.56E-05   | 0.02050372 | 8.06054587  | 6.49694326  | 7.41128552  | 6.44689557  | 3.94943346 | 3.86188376 | 4.1336233  |
| Gm2030     | 3.09104294 | 5.79764196 | 3.94E-05   | 0.02005732 | 7.86518949  | 7.05186403  | 7.43037702  | 6.14206805  | 3.7512119  | 4.1768694  | 4.16591381 |
| multi      | 3.08789447 | 5.77590905 | 5.49E-05   | 0.02078215 | 8.08527037  | 6.50606848  | 7.38536182  | 6.42046889  | 3.98543739 | 3.8775659  | 4.17191048 |
| Gm6121     | 3.08246058 | 5.8947564  | 4.89E-05   | 0.02078215 | 8.08772152  | 6.83673072  | 7.49133147  | 6.44753699  | 3.7115221  | 4.34124053 | 4.34771606 |
| multi      | 3.07188937 | 4.97774082 | 0.0001295  | 0.02199192 | 7.3735667   | 5.66547055  | 6.6829591   | 5.45507302  | 3.1958319  | 3.08870281 | 3.38259169 |
| Gm7697     | 3.03705646 | 5.06431167 | 0.00021856 | 0.02537506 | 7.21145753  | 6.00047405  | 6.83500994  | 5.01668766  | 3.40256574 | 3.1164232  | 3.46756356 |
| multi      | 3.0346446  | 5.42434575 | 9.31E-05   | 0.02078215 | 7.7383117   | 6.08647173  | 7.09997567  | 5.9748718   | 3.71785495 | 3.56256127 | 3.79037314 |
| multi      | 3.0346446  | 5.42434575 | 9.31E-05   | 0.02078215 | 7.7383117   | 6.08647173  | 7.09997567  | 5.9748718   | 3.71785495 | 3.56256127 | 3.79037314 |
| multi      | 3.02573503 | 5.44979778 | 0.00083639 | 0.0384683  | 7.91742739  | 5.59629662  | 7.38813389  | 5.68430756  | 3.85234777 | 3.64613499 | 3.36393625 |
| Gm14525    | 3.01970334 | 6.49000435 | 6.49E-05   | 0.02078215 | 8.62002693  | 7.35238234  | 8.17405888  | 6.99018354  | 4.35723346 | 4.97812671 | 4.95801857 |
| multi      | 3.01287391 | 5.3416797  | 0.00061774 | 0.03450916 | 7.87693065  | 6.06970083  | 6.93013264  | 6.56488138  | 4.15376767 | 2.83598622 | 3.8703585  |
| multi      | 2.99134234 | 5.12848362 | 0.00040312 | 0.029123   | 7.59358289  | 5.7189167   | 6.94932558  | 5.38017937  | 3.60535363 | 3.4709141  | 3.18116768 |
| Speer8-psi | 2.98374595 | 5.81094237 | 0.00033328 | 0.02842636 | 7.97051672  | 7.28793347  | 7.43478593  | 5.66552643  | 3.83157006 | 4.37726648 | 4.1089975  |
| Gm6902     | 2.97969681 | 5.23746849 | 0.00019399 | 0.02537506 | 7.24620282  | 6.20080675  | 6.35006214  | 5.26085393  | 3.46465524 | 3.53046854 | 3.60923002 |
| Gm5169     | 2.97617709 | 6.25599262 | 5.15E-05   | 0.02078215 | 8.3229876   | 7.02947011  | 7.9043376   | 6.86919305  | 4.14982916 | 4.87437801 | 4.64175284 |
| Vmn1r115   | 2.9749862  | 6.18705956 | 0.00023401 | 0.02624762 | 8.61955748  | 6.93853179  | 7.75597091  | 6.5341544   | 4.36241713 | 4.24907089 | 4.84971432 |
| Slx        | 2.97283528 | 6.06914175 | 4.42E-05   | 0.0209375  | 8.13144082  | 6.85739465  | 7.7412968   | 6.64272378  | 4.09416069 | 4.62174979 | 4.39525271 |
| Vmn1r112   | 2.97102526 | 5.24843877 | 6.48E-05   | 0.02078215 | 7.54069203  | 5.9979216   | 6.69583604  | 5.85249157  | 3.66334387 | 3.35283629 | 3.63594997 |
| Gm14347    | 2.96053413 | 4.61153722 | 0.00069429 | 0.03616409 | 6.82189707  | 5.15236521  | 6.87361703  | 4.67347092  | 2.8853248  | 3.03068639 | 2.84339909 |
| multi      | 2.94060775 | 4.81011145 | 0.00025563 | 0.0268002  | 7.17535695  | 5.40871241  | 6.52301625  | 5.17440205  | 2.93331818 | 3.0697251  | 3.38624922 |
| multi      | 2.94060775 | 4.81011145 | 0.00025563 | 0.0268002  | 7.17535695  | 5.40871241  | 6.52301625  | 5.17440205  | 2.93331818 | 3.0697251  | 3.38624922 |
| multi      | 2.91806929 | 5.35295364 | 0.0063297  | 0.03486078 | 7.89316019  | 5.01119519  | 6.8498994   | 5.65996428  | 4.19367241 | 3.04431253 | 3.81847169 |
| multi      | 2.91637169 | 5.13139107 | 0.00035559 | 0.02891443 | 7.3782392   | 6.00833701  | 6.9844236   | 5.15405879  | 3.40347368 | 3.39703881 | 3.59416638 |
| Vmn1r103   | 2.91387313 | 5.15949551 | 0.00064319 | 0.0350935  | 7.57226145  | 5.16544734  | 7.06092796  | 5.83455636  | 3.55514967 | 3.47255222 | 3.45557355 |
| multi      | 2.90198892 | 4.71535621 | 0.00012394 | 0.02195948 | 6.93506518  | 5.21966227  | 6.3921484   | 5.28908712  | 3.07257131 | 2.96430249 | 3.13435668 |
| multi      | 2.90198892 | 4.71535621 | 0.00012394 | 0.         |             |             |             |             |            |            |            |

|             |             |            |            |            |            |            |            |            |            |            |            |
|-------------|-------------|------------|------------|------------|------------|------------|------------|------------|------------|------------|------------|
| Olf1r11     | 2.77909399  | 4.608701   | 0.00019564 | 0.02537506 | 6.15746388 | 6.72958262 | 5.23822694 | 5.07369166 | 2.70785232 | 3.5165667  | 2.80243288 |
| Vmm1r158    | 2.76895971  | 5.10262885 | 0.00070231 | 0.03636915 | 7.56407238 | 5.68320311 | 6.67754999 | 5.23247802 | 3.79676341 | 3.30085685 | 3.46347822 |
| Vmm1r100    | 2.75993076  | 5.14182683 | 0.00027838 | 0.02681541 | 7.49042191 | 5.74838374 | 6.57844559 | 5.48136595 | 3.62247968 | 3.43127846 | 3.6404125  |
| Vmm1r157    | 2.75473359  | 5.03269018 | 7.25E-05   | 0.02078215 | 7.08149189 | 5.89979814 | 6.37415389 | 5.49771727 | 3.82639548 | 3.1454033  | 3.40387036 |
| multi       | 2.7472934   | 6.4095501  | 0.0002892  | 0.02700353 | 8.66280445 | 7.051682   | 7.94951997 | 6.68383981 | 5.09999206 | 4.76846044 | 4.65055196 |
| multi       | 2.7472934   | 6.4095501  | 0.0002892  | 0.02700353 | 8.66280445 | 7.051682   | 7.94951997 | 6.68383981 | 5.09999206 | 4.76846044 | 4.65055196 |
| Gm5168      | 2.74166468  | 6.06191502 | 8.84E-05   | 0.02078215 | 8.01882199 | 6.88650811 | 7.56865403 | 6.47367254 | 4.07839541 | 4.78145542 | 4.59279894 |
| Vmm1r113    | 2.7389927   | 5.40414109 | 0.00037459 | 0.02891443 | 7.74849218 | 6.04227309 | 6.88986843 | 5.63134671 | 3.93264716 | 3.65996249 | 3.92439755 |
| multi       | 2.72413086  | 5.21638512 | 0.00028427 | 0.02693913 | 6.95123269 | 7.11623013 | 6.33389829 | 5.13411798 | 3.54855328 | 3.69771619 | 3.73294726 |
| Vmm1r79     | 2.71444853  | 5.16592675 | 0.00038227 | 0.02891443 | 5.78552095 | 5.90134445 | 7.59663482 | 6.03354712 | 3.71600959 | 3.07513774 | 4.0532926  |
| Speer4cos   | 2.69519919  | 6.16271485 | 0.0005351  | 0.03256134 | 8.15274267 | 7.54931426 | 7.64468608 | 5.92445785 | 4.58540131 | 4.89366098 | 3.8879198  |
| Vmm1r119    | 2.66839813  | 5.22089504 | 0.00094911 | 0.03995646 | 7.63427413 | 5.50156945 | 6.84230547 | 5.47982788 | 3.91970153 | 3.69355421 | 3.47503256 |
| multi       | 2.66248653  | 6.63031305 | 0.00017487 | 0.02537506 | 8.50114634 | 7.14472673 | 8.4210456  | 7.01859614 | 4.97521118 | 5.0151586  | 5.33634947 |
| multi       | 2.64910499  | 5.39632375 | 0.0004685  | 0.03133421 | 7.73386331 | 6.35367474 | 6.46738325 | 5.57169653 | 4.17529965 | 4.0303987  | 3.4195006  |
| multi       | 2.64910499  | 5.39632375 | 0.0004685  | 0.03133421 | 7.73386331 | 6.35367474 | 6.46738325 | 5.57169653 | 4.17529965 | 4.0303987  | 3.4195006  |
| multi       | 2.64551486  | 5.3259228  | 0.00052985 | 0.03256134 | 6.99349704 | 7.16294651 | 6.6208155  | 5.06160048 | 3.63831176 | 3.88478094 | 3.91950737 |
| Vmm1r117    | 2.62997483  | 5.35258156 | 0.00052139 | 0.03256134 | 7.69441486 | 6.53394514 | 6.46841769 | 5.52234983 | 4.14005054 | 4.00430752 | 3.40485834 |
| Olf1r482    | 2.62008128  | 4.01193396 | 8.04E-05   | 0.02078215 | 5.95261401 | 4.31182979 | 5.4143755  | 4.86118444 | 2.52016114 | 2.56372322 | 2.4603496  |
| Vmm1r125    | 2.52189835  | 4.50132936 | 0.00038353 | 0.02891443 | 6.6960738  | 5.13342309 | 5.74159655 | 4.75747831 | 3.05325353 | 2.80354389 | 3.32393634 |
| Vmm1r238    | 2.514717386 | 5.32540397 | 0.00061152 | 0.03440815 | 6.25629231 | 5.6488662  | 7.64628924 | 6.06018045 | 4.16558371 | 3.9955802  | 4.11205785 |
| Gm10354     | 2.47538618  | 5.9167829  | 0.00012276 | 0.02195948 | 7.632026   | 6.94045844 | 7.29769767 | 6.04046868 | 4.27388422 | 4.49047218 | 4.74247314 |
| Gm3669      | 2.47160501  | 5.58137386 | 0.00036943 | 0.02891443 | 7.44847597 | 5.89959991 | 7.24135497 | 5.93981866 | 4.01052257 | 4.67856669 | 4.29780517 |
| multi       | 2.4711909   | 4.80551408 | 0.00057939 | 0.03341261 | 6.92895947 | 5.32940419 | 6.2231592  | 4.9768607  | 3.44717346 | 3.08061688 | 3.6524264  |
| multi       | 2.4711909   | 4.80551408 | 0.00057939 | 0.03341261 | 6.92895947 | 5.32940419 | 6.2231592  | 4.9768607  | 3.44717346 | 3.08061688 | 3.6524264  |
| Speer4c     | 2.45713376  | 5.62079692 | 0.00022689 | 0.02590667 | 7.41457221 | 6.63436338 | 7.01319299 | 5.6332884  | 4.02205388 | 4.42200962 | 4.40600995 |
| Spin2e      | 2.4477568   | 5.08871304 | 0.00123944 | 0.0438243  | 7.16270405 | 5.71378191 | 6.65283919 | 5.00337103 | 3.34663181 | 3.52665168 | 4.1970116  |
| Gm3669      | 2.43236873  | 5.86162377 | 0.00034646 | 0.02869891 | 7.76957373 | 6.15209025 | 7.43410054 | 6.26050552 | 4.32490889 | 4.50746155 | 4.58272589 |
| Gm2165      | 2.43236873  | 5.86162377 | 0.00034646 | 0.02869891 | 7.76957373 | 6.15209025 | 7.43410054 | 6.26050552 | 4.32490889 | 4.50746155 | 4.58272589 |
| Gm3669      | 2.43236873  | 5.86162377 | 0.00034646 | 0.02869891 | 7.76957373 | 6.15209025 | 7.43410054 | 6.26050552 | 4.32490889 | 4.50746155 | 4.58272589 |
| Gm7982      | 2.41794837  | 5.30763221 | 0.00036404 | 0.02891443 | 7.38669365 | 5.92143454 | 6.5676092  | 5.49084583 | 3.95882224 | 3.87437657 | 3.94461439 |
| Gm9758      | 2.40780569  | 5.48205759 | 0.00017844 | 0.02537506 | 6.9691079  | 6.83167099 | 6.80233695 | 5.45278142 | 3.86437049 | 4.16172098 | 4.2924144  |
| Gm6523      | 2.39206466  | 5.76473579 | 0.0001164  | 0.02162389 | 7.63875304 | 6.8226745  | 6.48201657 | 6.21618134 | 4.76853473 | 4.08112114 | 4.34387818 |
| Gm7958      | 2.38097859  | 4.59177833 | 3.41E-05   | 0.02005732 | 6.3497753  | 5.64473692 | 5.61713139 | 5.0171473  | 3.22729812 | 3.18907544 | 3.27283836 |
| Vmm1r129    | 2.37315742  | 4.97920868 | 0.00024635 | 0.02645122 | 6.99871417 | 5.67088956 | 6.08916291 | 5.22687794 | 3.74861499 | 3.5302042  | 3.58873697 |
| Gm3669      | 2.37236178  | 5.65465745 | 0.00039049 | 0.02891443 | 7.41721708 | 5.92187261 | 7.33120751 | 6.01533849 | 4.16089546 | 4.32896774 | 4.40720352 |
| multi       | 2.37099236  | 6.48340439 | 0.00012481 | 0.02195948 | 8.260189   | 7.22295558 | 7.79362783 | 6.72140348 | 5.1035208  | 4.9957636  | 5.28637045 |
| multi       | 2.36767498  | 4.9277902  | 0.0002404  | 0.02624762 | 6.94870723 | 5.62192013 | 6.00824206 | 5.19116279 | 3.71341127 | 3.49315175 | 3.5179362  |
| multi       | 2.36767498  | 4.9277902  | 0.0002404  | 0.02624762 | 6.94870723 | 5.62192013 | 6.00824206 | 5.19116279 | 3.71341127 | 3.49315175 | 3.5179362  |
| multi       | 2.36336956  | 4.82708529 | 3.94E-05   | 0.02005732 | 6.6031289  | 5.73173104 | 5.77267217 | 5.5229973  | 3.42371971 | 3.46501514 | 3.54103036 |
| Gm2863      | 2.35812853  | 6.64862554 | 0.00187442 | 0.04943283 | 8.50901215 | 6.74622551 | 8.60760339 | 6.77416716 | 5.39326847 | 5.51433395 | 4.99576816 |
| multi       | 2.35609419  | 4.82848181 | 0.00052111 | 0.03245815 | 6.80015528 | 5.13285631 | 6.31040746 | 5.1095268  | 3.22020259 | 3.51571759 | 3.41050664 |
| Gm6902      | 2.35369333  | 5.1962637  | 0.00094637 | 0.03994288 | 6.56544145 | 7.29001692 | 5.82917645 | 5.15352281 | 3.7151472  | 4.06280946 | 3.77593159 |
| Gm4297      | 2.33172346  | 5.05741959 | 0.00066208 | 0.03549404 | 6.97384493 | 5.85132807 | 6.32658368 | 5.07516189 | 3.2649929  | 3.6787044  | 4.15132126 |
| 4930572Oo3l | 2.3316397   | 6.19072284 | 0.00019136 | 0.02537506 | 7.86228607 | 7.1433935  | 7.47729353 | 6.27701491 | 4.52616243 | 4.98662206 | 5.06228742 |
| Olf1r1380   | 2.3273893   | 6.63734587 | 0.00016575 | 0.02506741 | 8.16296996 | 6.86224624 | 8.27997914 | 7.23399834 | 5.23632473 | 5.37764168 | 5.30826097 |
| Gm3453      | 2.3179647   | 5.83763343 | 0.00035022 | 0.02876369 | 7.43638108 | 6.98856379 | 7.19566199 | 5.70358411 | 4.42670874 | 4.70410829 | 4.4084321  |
| multi       | 2.31630392  | 4.95739708 | 9.04E-05   | 0.02078215 | 6.7569628  | 5.41069416 | 6.10590392 | 5.52683418 | 3.49567197 | 3.79045347 | 3.6152549  |
| Gm21149     | 2.30941272  | 5.92145101 | 0.00076838 | 0.0373689  | 7.77043281 | 6.89833856 | 7.27129865 | 5.70472728 | 4.44283338 | 4.7328267  | 4.78619875 |
| Speer4e     | 2.30147349  | 5.23678126 | 0.00023565 | 0.02624762 | 6.84239668 | 6.13344941 | 6.53001547 | 5.20664662 | 3.70074018 | 3.96889869 | 4.0953218  |
| Gm5934      | 2.30024944  | 4.88105276 | 0.00026914 | 0.02681541 | 6.75144434 | 5.62499113 | 5.97179654 | 5.11926381 | 3.19199871 | 3.59917965 | 3.90869518 |
| multi       | 2.29700517  | 4.95080721 | 0.00016408 | 0.02506741 | 6.82463214 | 5.33112023 | 6.11815976 | 5.46703985 | 3.57712327 | 3.70095241 | 3.63662282 |
| multi       | 2.29700517  | 4.95080721 | 0.00016408 | 0.02506741 | 6.82463214 | 5.33112023 | 6.11815976 | 5.46703985 | 3.57712327 | 3.70095241 | 3.63662282 |
| multi       | 2.29700517  | 4.95080721 | 0.00016408 | 0.02506741 | 6.82463214 | 5.33112023 | 6.11815976 | 5.46703985 | 3.57712327 | 3.70095241 | 3.63662282 |
| Olf1r1381   | 2.29256479  | 7.00024781 | 0.00133239 | 0.04466897 | 8.77107036 | 7.11277841 | 8.85948747 | 7.18776605 | 5.83933205 | 5.71638571 | 5.51491459 |
| 1700049E17R | 2.27987487  | 4.73011974 | 0.00010714 | 0.02161988 | 6.26790506 | 5.24075836 | 6.11207204 | 5.20296503 | 3.0657466  | 3.7848063  | 3.43144939 |
| Skh1        | 2.27818954  | 4.52596563 | 3.88E-05   | 0.02005732 | 6.32946455 | 5.46528022 | 4.99687007 | 5.30771546 | 3.20910288 | 3.10683405 | 3.35658218 |
| Gm3685      | 2.26843866  | 6.25637057 | 0.00045737 | 0.03115268 | 8.12443241 | 7.13757318 | 7.44494504 | 6.20728364 | 4.82303894 | 5.02597701 | 5.03134378 |
| Olf1r972    | 2.25302689  | 4.30723922 | 2.81E-06   | 0.01858742 | 5.70177211 | 5.28563835 | 4.97831137 | 5.12556684 | 2.85829505 | 3.15728702 | 3.04380377 |
| multi       | 2.25227593  | 6.20870751 | 0.00033271 | 0.02842636 | 8.06074179 | 7.14944754 | 7.24661886 | 6.23906633 | 4.90703262 | 5.07565974 | 4.78238573 |
| Gm17019     | 2.24287374  | 6.35371946 | 0.00020862 | 0.02537506 | 7.76199932 | 7.42437766 | 7.71764329 | 6.355784   | 4.74848013 | 5.26778316 | 5.19996688 |
| Gm14625     | 2.24162946  | 4.62087046 | 9.94E-05   | 0.02078215 | 6.36723881 | 5.36706414 | 5.65598964 | 4.93598262 | 3.20674527 | 3.28950835 | 3.52356441 |
| Gm3383      | 2.22797729  | 6.17927491 | 0.00046987 | 0.03133421 | 7.94872391 | 6.76934134 | 7.51104854 | 6.30737549 | 4.6602257  | 5.1139549  | 4.7468129  |
| multi       | 2.22768879  | 4.55420009 | 1.61E-05   | 0.02005732 | 6.07764753 | 5.57047346 | 5.39364648 | 4.99392795 | 3.28929235 | 3.21467158 | 3.33974126 |
| Gm2244      | 2.2220064   | 5.86830389 | 0.00022391 | 0.02569105 | 7.69804448 | 6.69085856 | 6.87396547 | 6.02840531 | 4.61769576 | 4.73755426 | 4.43160342 |
| Gm3047      | 2.22053623  | 5.62995833 | 0.00037671 | 0.02891443 | 7.53274281 | 6.3621363  | 6.7118245  | 5.71976327 | 4.26294442 | 4.39857241 | 4.4217263  |
| Skh1        | 2.19422166  | 4.50007486 | 9.18E-05   | 0.02078215 | 6.20307791 | 5.35527061 | 5.40771466 | 4.79575912 | 3.42683589 | 3.11608086 | 3.19578499 |
| Gm14594     | 2.18961731  | 4.40317252 | 4.03E-05   | 0.02007815 | 5.99316049 | 5.29855051 | 5.30652076 | 4.76808801 | 3.31523257 | 3.01730014 | 3.12326188 |
| Gm21671     | 2.1758886   | 6.09934432 | 0.00025889 | 0.02680002 | 7.56157977 | 6.5114853  | 7.66523582 | 6.38950793 | 5.03073773 | 4.92399234 | 4.61320816 |
| Vmm1r191    | 2.17581156  | 4.11371551 | 0.00090181 | 0.03970412 | 6.20456967 | 4.7850692  | 5.03689254 | 4.15829329 | 2.76613099 | 2.88684228 | 2.95821057 |
| multi       | 2.17504385  | 6.44279    |            |            |            |            |            |            |            |            |            |

|              |                 |                 |                 |                 |                 |                 |                 |                 |                 |                 |                 |
|--------------|-----------------|-----------------|-----------------|-----------------|-----------------|-----------------|-----------------|-----------------|-----------------|-----------------|-----------------|
| Gm4541       | 2.14996642      | 4.77681367      | 0.00150867      | 0.0458877       | 6.88089467      | 4.89007136      | 5.91299203      | 5.10895334      | 3.65350909      | 3.24870686      | 3.74256834      |
| multi        | 2.14700878      | 6.40720932      | 0.00027405      | 0.02681541      | 8.08489983      | 6.87638122      | 7.71002739      | 6.63811529      | 5.22106713      | 5.0132299       | 5.30674444      |
| multi        | 2.1444663       | 4.35009099      | 0.00173757      | 0.0482918       | 6.62901912      | 4.86173881      | 5.1289298       | 4.45690417      | 3.1784124       | 3.13092081      | 3.06471183      |
| multi        | 2.1444663       | 4.35009099      | 0.00173757      | 0.0482918       | 6.62901912      | 4.86173881      | 5.1289298       | 4.45690417      | 3.1784124       | 3.13092081      | 3.06471183      |
| Gm16440      | 2.11835469      | 5.80366281      | 0.00030222      | 0.02842636      | 7.34655835      | 6.77974877      | 6.98738535      | 5.73242397      | 4.62165729      | 4.73390618      | 4.42395978      |
| multi        | 2.11781434      | 5.1211301       | 0.00026924      | 0.02681541      | 6.4628425       | 6.55973924      | 6.02261013      | 5.0698674       | 3.95641192      | 3.87885929      | 3.89758022      |
| multi        | 2.11781434      | 5.1211301       | 0.00026924      | 0.02681541      | 6.4628425       | 6.55973924      | 6.02261013      | 5.0698674       | 3.95641192      | 3.87885929      | 3.89758022      |
| multi        | 2.11035339      | 6.08610682      | 0.00063154      | 0.03486078      | 7.90268443      | 6.94307667      | 7.08248648      | 6.03392835      | 4.66753453      | 4.9028597       | 5.07017756      |
| Gm3259       | 2.09139893      | 5.46082089      | 0.0007725       | 0.03766693      | 7.04241088      | 6.15437465      | 6.92152139      | 5.31023195      | 4.2968166       | 4.18067384      | 4.31971694      |
| Olfr1489     | 2.07984003      | 4.57904356      | 0.0011215       | 0.04219881      | 5.64578872      | 6.39281059      | 5.1661504       | 4.67686458      | 3.55174299      | 2.79598774      | 3.82395991      |
| multi        | 2.07572962      | 5.85331427      | 0.00083135      | 0.0384683       | 7.63032475      | 6.67188776      | 6.93718798      | 5.7322502       | 4.50137626      | 4.5815918       | 4.9185811       |
| Gm3278       | 2.07556324      | 5.92062276      | 0.0002082       | 0.02537506      | 7.5273724       | 6.83351225      | 6.88467337      | 5.99496143      | 4.78485737      | 4.84012192      | 4.57872058      |
| multi        | 2.07185257      | 4.80605469      | 0.00090921      | 0.03970412      | 6.70316473      | 4.89337036      | 5.96139202      | 5.21803891      | 3.55737449      | 3.79395388      | 3.51508842      |
| Gm8212       | 2.06990975      | 5.61380851      | 0.00141972      | 0.0448196       | 7.43298225      | 5.80439383      | 7.04679105      | 5.71948362      | 4.64851289      | 4.30863244      | 4.33563248      |
| Olfr1484     | 2.06718681      | 3.96844436      | 3.97E-06        | 0.01858742      | 4.80484082      | 4.77927579      | 5.25643206      | 4.57697757      | 2.97223806      | 2.6544052       | 2.73494101      |
| 1700049E17R  | 2.0643881       | 4.70085434      | 3.50E-05        | 0.02005732      | 5.90606868      | 5.37964166      | 6.00909226      | 5.0475658       | 3.34511867      | 3.65076483      | 3.56772848      |
| Gm3264       | 2.05518047      | 6.39332667      | 0.00051922      | 0.03245815      | 8.10041991      | 7.07580136      | 7.53258131      | 6.38767061      | 5.06955789      | 5.38680445      | 5.20045113      |
| multi        | 2.03952694      | 5.21676667      | 0.00127696      | 0.0441793       | 6.79166699      | 4.95022462      | 6.66186775      | 5.95963651      | 4.21957471      | 3.98959193      | 3.94480145      |
| Speerd4      | 2.039123        | 5.33352074      | 0.0013489       | 0.04466897      | 7.10416999      | 5.85100452      | 6.67721512      | 5.19733274      | 3.98921927      | 4.25526885      | 4.26043468      |
| Gm5458       | 2.02722935      | 6.12118821      | 0.00038077      | 0.02891443      | 7.68387688      | 6.99523332      | 7.22202203      | 6.05887093      | 4.91997675      | 4.89592692      | 5.07241066      |
| Gm5795       | 2.02365902      | 5.64498601      | 0.00141563      | 0.0448196       | 7.57465405      | 6.53991446      | 6.45526302      | 5.47924225      | 4.36809279      | 4.56935902      | 4.53414528      |
| multi        | 2.02229916      | 5.36980045      | 0.00172974      | 0.0482918       | 7.03292701      | 5.30231497      | 6.72743643      | 6.16248723      | 4.34817713      | 4.18155527      | 4.11287041      |
| Gm5797       | 2.0193191       | 5.45649687      | 0.00106366      | 0.04206153      | 7.05553117      | 6.20573904      | 6.79306711      | 5.23334007      | 4.1464779       | 4.32641663      | 4.43490621      |
| multi        | 2.01351215      | 4.54523349      | 0.00032423      | 0.02821483      | 6.17960763      | 5.05612015      | 5.70235807      | 4.69458323      | 3.37719088      | 3.33107762      | 3.47569686      |
| multi        | 2.01194894      | 5.38916719      | 1.85E-05        | 0.02005732      | 6.48822584      | 6.46911332      | 6.38196912      | 5.6664158       | 4.39316258      | 4.10771747      | 4.14556648      |
| multi        | 2.00963592      | 5.03849352      | 5.79E-05        | 0.02078215      | 6.4913089       | 5.84529083      | 5.9348144       | 5.32764259      | 3.84612413      | 3.74676955      | 4.07749673      |
| Gm8297       | 2.00879636      | 6.13985166      | 0.00053399      | 0.03256134      | 6.68793657      | 6.86500463      | 7.36159375      | 6.0894226       | 4.80609284      | 5.27226559      | 4.1259064       |
| Olfr1385     | 2.0032266       | 4.8284318       | 0.00120875      | 0.04356069      | 6.61061923      | 4.75313584      | 5.49277849      | 5.89146106      | 3.27375         | 3.90243634      | 3.87484164      |
| LOC10086161  | 1.99289778      | 6.10127311      | 0.00159795      | 0.04704794      | 7.94430992      | 6.46687169      | 7.28307235      | 6.12823467      | 4.83009723      | 5.35456036      | 4.70267556      |
| Gm6460       | 1.99210338      | 5.82961655      | 0.00073087      | 0.03671338      | 7.36535258      | 6.24116992      | 7.24351105      | 5.88346702      | 4.74255419      | 4.84769392      | 4.45560718      |
| Gm38418      | 1.98674179      | 5.93229621      | 0.00079088      | 0.03801274      | 7.68555507      | 6.78987909      | 6.81475064      | 5.84484311      | 4.62042561      | 4.90921041      | 4.86140956      |
| multi        | 1.98503174      | 5.19405684      | 0.00136728      | 0.04469082      | 6.80802826      | 4.94955023      | 6.57362993      | 5.8479305       | 4.02885402      | 4.02731536      | 4.12308958      |
| Gm3500       | 1.97067922      | 6.75348477      | 0.00073807      | 0.03675749      | 8.41142696      | 7.09173547      | 8.00470192      | 6.88438194      | 5.47809134      | 5.855143        | 5.54891559      |
| multi        | 1.96927233      | 6.00681118      | 0.0004024       | 0.029123        | 7.5623867       | 6.70352503      | 7.1214964       | 6.01472449      | 4.75927657      | 5.07194812      | 4.81331342      |
| Gm1979       | 1.96615084      | 5.62418136      | 0.0012759       | 0.02195948      | 7.1258953       | 6.6279182       | 6.65226593      | 5.82449627      | 4.48751254      | 4.5271804       | 4.37303686      |
| Olfr823      | 1.95863915      | 4.42736056      | 2.74E-05        | 0.02005732      | 5.57611252      | 4.87223022      | 5.20850258      | 5.41026403      | 3.41684777      | 3.60154369      | 2.90602312      |
| D83000k20    | 1.9555804       | 5.29869642      | 0.00092016      | 0.03970412      | 6.9944873       | 6.2811849       | 6.09915763      | 5.17237939      | 4.28076294      | 4.32233662      | 3.94054659      |
| Gm3002       | 1.94974486      | 6.22756224      | 0.00167245      | 0.04809227      | 8.00114255      | 6.40188789      | 7.55871644      | 6.29092184      | 5.20692353      | 5.11993463      | 5.0134088       |
| Gm10408      | 1.94359524      | 5.65984412      | 0.00060711      | 0.03440815      | 7.38754494      | 6.46349053      | 6.33523161      | 5.78498696      | 4.50426317      | 4.87782896      | 4.26556267      |
| 4933402N22   | 1.93673483      | 5.82095551      | 0.00110731      | 0.04219881      | 7.31869453      | 6.2040088       | 7.23304527      | 5.84819028      | 4.86422848      | 4.94951222      | 4.32900897      |
| Xdh          | 1.93611811      | 3.823693681     | 0.00016923      | 0.02507136      | 9.62494025      | 9.02384703      | 9.32278032      | 8.29523924      | 7.12859041      | 7.11947346      | 7.14336805      |
| multi        | 1.93003259      | 4.92297785      | 0.00042814      | 0.03000416      | 6.6029282       | 5.31022833      | 5.9158212       | 5.17156099      | 3.6558446       | 3.93866529      | 3.86579637      |
| Gm3696       | 1.92972894      | 6.02254866      | 0.00040706      | 0.02913751      | 7.50703061      | 6.62608847      | 7.22898591      | 6.03622341      | 4.82405808      | 4.93959364      | 4.93959364      |
| D83003k20    | 1.92034964      | 5.81066882      | 0.00121907      | 0.04363108      | 7.57074107      | 6.30299467      | 6.87064236      | 5.79032514      | 4.71136827      | 4.96859261      | 4.46001765      |
| Gm14596      | 1.90877355      | 4.08173129      | 8.59E-05        | 0.02078215      | 5.58958531      | 4.62577598      | 4.90525635      | 4.47849074      | 3.06077912      | 2.87762589      | 3.03460651      |
| Gm3264       | 1.90532858      | 6.77973031      | 0.0009351       | 0.03983438      | 8.43922408      | 7.39545672      | 7.85298436      | 6.69753363      | 5.73929203      | 5.84202436      | 5.49495996      |
| multi        | 1.90471126      | 5.83700556      | 0.0002544       | 0.02680002      | 7.24517945      | 6.49496231      | 6.98530496      | 5.88779482      | 4.80905516      | 4.69479185      | 4.74195037      |
| Gm3383       | 1.89670724      | 6.32830537      | 0.00087546      | 0.03931365      | 7.80227996      | 6.82094503      | 6.33119523      | 4.99891574      | 5.5313482       | 5.20315194      | 5.20315194      |
| multi        | 1.89534079      | 3.60737159      | 0.00072506      | 0.03663821      | 3.97792642      | 4.89065118      | 3.97695568      | 4.83310872      | 1.90957801      | 2.53468998      | 3.12869113      |
| multi        | 1.89534079      | 3.60737159      | 0.00072506      | 0.03663821      | 3.97792642      | 4.89065118      | 3.97695568      | 4.83310872      | 1.90957801      | 2.53468998      | 3.12869113      |
| Gzmc         | <b>1.888448</b> | <b>6.183048</b> | <b>0.000113</b> | <b>0.021624</b> | <b>6.377779</b> | <b>7.270161</b> | <b>7.154422</b> | <b>7.167171</b> | <b>5.221874</b> | <b>5.221197</b> | <b>6.478713</b> |
| Gm3558       | 1.88026822      | 6.18580013      | 0.00056474      | 0.03320372      | 7.72314395      | 6.75558503      | 7.31324589      | 6.17454262      | 5.01379349      | 5.15129761      | 5.16899234      |
| Xdh          | 1.87200484      | 8.74065558      | 9.04E-05        | 0.02078215      | 10.0682558      | 9.4442771       | 9.73804993      | 8.9211906       | 7.69044227      | 7.74958905      | 7.57278427      |
| 1700091H14R  | 1.86775111      | 5.5607416       | 0.0018025       | 0.04866722      | 7.18305057      | 5.74639571      | 6.92749518      | 5.8742948       | 4.5556935       | 4.63774558      | 4.28692665      |
| Gm16367      | 1.86596966      | 4.68885116      | 0.00025795      | 0.02680002      | 6.29393171      | 4.99755371      | 5.54796069      | 5.11476366      | 3.60046935      | 3.62461085      | 3.64266815      |
| Gm16427      | 1.85771972      | 5.22989466      | 7.04E-05        | 0.02078215      | 6.53196046      | 5.7077614       | 6.28202579      | 5.8264075       | 4.11353406      | 4.3181833       | 4.07329941      |
| Gm10408      | 1.85758696      | 5.46684216      | 0.00092747      | 0.03983348      | 7.20542949      | 6.24353977      | 6.05664094      | 5.54619323      | 4.44101447      | 4.65740809      | 4.11766912      |
| 5031410i06Ri | 1.85013783      | 5.18237604      | 8.28E-05        | 0.02078215      | 5.98579422      | 5.9226404       | 6.57852548      | 5.41420889      | 4.15678002      | 4.14154158      | 4.07714165      |
| Gm16367      | 1.85012668      | 4.76275083      | 0.00038535      | 0.02891443      | 6.4065152       | 5.0615915       | 5.63194257      | 5.12403215      | 3.67936206      | 3.69377234      | 3.74347235      |
| Vmn1r183     | 1.84616088      | 4.21791168      | 0.0011217       | 0.04219881      | 5.60197751      | 4.92414878      | 5.522145        | 3.98822264      | 3.16475049      | 3.25150304      | 3.07263429      |
| Gm3460       | 1.84423153      | 5.86658226      | 0.00137683      | 0.04476049      | 7.5182986       | 6.61163614      | 6.81862082      | 5.68605499      | 4.67122368      | 5.07252359      | 4.69474805      |
| C87414       | 1.82854715      | 4.72565461      | 0.00027067      | 0.02681541      | 3.6066851       | 5.18960357      | 5.53860511      | 5.00237691      | 3.75098475      | 3.63319878      | 3.65812806      |
| Gm5797       | 1.81798273      | 5.35168788      | 0.00164088      | 0.04771179      | 6.98054491      | 6.0110902       | 6.38860221      | 5.14305603      | 4.12844007      | 4.53181575      | 4.27826601      |
| Vmn1r124     | 1.80350741      | 4.24649553      | 0.00168307      | 0.04816089      | 6.90979413      | 4               |                 |                 |                 |                 |                 |

|             |            |            |            |            |            |            |            |            |            |            |            |
|-------------|------------|------------|------------|------------|------------|------------|------------|------------|------------|------------|------------|
| Zfp980      | 1.69338033 | 5.22549091 | 0.00031697 | 0.02814171 | 6.25416263 | 5.68019275 | 6.49795213 | 5.37259384 | 4.47929323 | 4.058606   | 4.23563579 |
| Gm3139      | 1.67771923 | 4.87232605 | 0.00167084 | 0.04809227 | 6.49061096 | 5.01049012 | 5.8308709  | 5.03342231 | 3.72914951 | 4.0714828  | 3.94025572 |
| 493055G01F  | 1.6683207  | 4.42045493 | 0.00031358 | 0.02805884 | 5.58927342 | 5.34472947 | 5.21087081 | 4.39692436 | 3.55209334 | 3.57107508 | 3.27821802 |
| Xdh         | 1.66170335 | 8.76813476 | 0.00018505 | 0.02537506 | 9.90866206 | 9.51318858 | 9.69191069 | 8.80741202 | 7.75418636 | 7.93271452 | 7.76886908 |
| Olfrr669    | 1.64673397 | 3.85729179 | 0.0017165  | 0.04817524 | 4.69940806 | 4.58542032 | 3.64449246 | 5.32317881 | 2.86832643 | 3.14342834 | 2.73718008 |
| Olfrr553    | 1.63755258 | 3.72378952 | 0.00043284 | 0.03015351 | 4.77493106 | 4.86177817 | 4.47838847 | 3.68729338 | 2.79555301 | 3.02644407 | 2.52124209 |
| Gm6455      | 1.62528142 | 5.28608028 | 0.00169347 | 0.04817524 | 6.50259286 | 5.66975102 | 6.54551084 | 5.21266312 | 4.60336613 | 4.46582312 | 4.00285487 |
| Gm3106      | 1.58636284 | 4.77190928 | 0.00017422 | 0.02537506 | 6.00937504 | 5.26431225 | 5.52470596 | 5.008723   | 3.6916729  | 4.05268742 | 3.85188837 |
| multi       | 1.58558637 | 5.1564093  | 2.55E-05   | 0.02005732 | 6.24121384 | 5.6476219  | 5.89258751 | 5.56236202 | 4.3468073  | 4.20271978 | 4.20155278 |
| multi       | 1.58027932 | 5.46352535 | 0.00023599 | 0.02624762 | 6.59845026 | 5.99998149 | 6.42624866 | 5.53847127 | 4.56387573 | 4.60763323 | 4.51001684 |
| Gm17026     | 1.5771631  | 5.49933271 | 0.00170825 | 0.04817524 | 6.86757463 | 5.91013802 | 6.54471594 | 5.37861042 | 4.65856728 | 4.74047345 | 4.39524922 |
| Gm3139      | 1.56790088 | 4.68314914 | 0.00129601 | 0.04422927 | 6.20354665 | 4.8220173  | 5.47096463 | 4.92389805 | 3.6510026  | 3.89996119 | 3.81065355 |
| multi       | 1.55149239 | 3.38973353 | 0.00021194 | 0.02537506 | 4.29944997 | 4.05255872 | 4.44892779 | 3.41769889 | 2.54350166 | 2.48679265 | 2.47920504 |
| Gm3139      | 1.54324256 | 4.4364365  | 0.00132928 | 0.04466897 | 5.9669132  | 4.58828229 | 5.15281313 | 4.68929605 | 3.42189448 | 3.65606847 | 3.58578789 |
| 4933406F09l | 1.52776301 | 3.69227733 | 0.0008109  | 0.03842244 | 4.98150743 | 3.98622324 | 4.65960808 | 3.76079286 | 2.75216357 | 2.85098094 | 2.85466517 |
| multi       | 1.52278462 | 4.28625572 | 6.87E-05   | 0.02078215 | 5.36707681 | 5.00593868 | 4.84365671 | 4.53883858 | 3.55898923 | 3.32808874 | 3.36120126 |
| 1700023F02F | 1.52287229 | 4.3544327  | 0.0001494  | 0.02428501 | 5.16066698 | 5.12382147 | 5.32437673 | 4.41847274 | 3.63458676 | 3.45484644 | 3.36425508 |
| Speer4b     | 1.51452724 | 4.73896748 | 3.70E-05   | 0.02005732 | 5.61834034 | 5.52834055 | 5.48026544 | 4.92525603 | 3.85182448 | 3.9106946  | 3.85805096 |
| Vmmr168     | 1.51183645 | 4.04688429 | 0.0005739  | 0.03341621 | 5.8930362  | 4.31851654 | 5.02541912 | 4.24601741 | 2.89206292 | 3.2289339  | 3.42793643 |
| Olfrr1346   | 1.50794827 | 7.28082979 | 0.00152096 | 0.0458877  | 8.45641151 | 7.75795988 | 8.36938306 | 7.12461886 | 6.26305118 | 6.58723086 | 6.40715314 |
| multi       | 1.47872893 | 4.91437267 | 0.00027975 | 0.02683664 | 5.91781121 | 5.55946206 | 5.78005115 | 4.93513014 | 3.90271971 | 4.20615241 | 4.09928201 |
| Mrgpr1a     | 1.47430145 | 4.91308228 | 0.00067176 | 0.03549404 | 5.98820233 | 5.28787206 | 5.94608644 | 4.95754221 | 3.9659158  | 4.29296566 | 3.95371378 |
| Csprs       | 1.46120249 | 5.78313403 | 0.00114857 | 0.04252446 | 7.10034337 | 6.27426143 | 6.48476929 | 5.7780806  | 4.90045615 | 5.20000888 | 4.74401852 |
| Olfrr320    | 1.42938173 | 5.40575512 | 0.00034821 | 0.02869891 | 6.05375545 | 5.83596605 | 6.4786396  | 5.70529807 | 4.27591548 | 4.9915194  | 4.4994618  |
| Sfiu        | 1.42820314 | 6.98965215 | 0.00069265 | 0.03616409 | 8.18068054 | 7.25668275 | 7.8185325  | 7.15206106 | 6.14901355 | 6.39305687 | 5.978538   |
| Gm7361      | 1.42128251 | 5.48457452 | 0.00044561 | 0.03076842 | 6.54079122 | 5.82062674 | 6.41267292 | 5.6006912  | 4.51075444 | 4.70683888 | 4.79964593 |
| Gm5444      | 1.40944794 | 4.12716199 | 7.93E-06   | 0.02005732 | 4.72236817 | 4.79652707 | 4.91081818 | 4.50585558 | 3.22559443 | 3.21760892 | 3.42514275 |
| 1700029F12R | 1.39468655 | 4.97032681 | 0.00076849 | 0.0373689  | 5.83552331 | 4.63366635 | 5.97311697 | 4.84719182 | 4.14601684 | 4.28374925 | 4.09032311 |
| Gm21637     | 1.39438792 | 4.87180716 | 0.00056945 | 0.03322928 | 5.59484199 | 5.68611536 | 5.78893851 | 4.80771209 | 3.86993556 | 4.05874978 | 4.29635684 |
| Olfrr472    | 1.38661827 | 3.62831161 | 0.00189333 | 0.04296425 | 4.68668751 | 4.35504071 | 4.15700029 | 4.52590819 | 3.0592031  | 2.863339   | 2.61233487 |
| Olfrr1282   | 1.38615141 | 3.97756035 | 0.00146748 | 0.04561646 | 4.95255871 | 4.57949967 | 4.98621132 | 3.76823129 | 3.12865852 | 3.29038428 | 3.1373787  |
| Gm3643      | 1.38292786 | 3.81396793 | 0.00170973 | 0.04817524 | 4.94386082 | 4.40370453 | 4.86025527 | 3.78544367 | 2.92495986 | 3.09416956 | 3.05204089 |
| 4930503E14F | 1.37581727 | 4.20693362 | 0.00114965 | 0.04252446 | 5.27739494 | 4.15431129 | 5.15066595 | 4.6067862  | 3.24697633 | 3.61440904 | 3.40087159 |
| Gm19422     | 1.37405873 | 6.12938446 | 0.0004985  | 0.03196834 | 6.95503912 | 6.39230687 | 7.16455687 | 6.36026423 | 5.64858188 | 5.12644394 | 5.25759832 |
| Platr5      | 1.3526662  | 6.11435142 | 1.79E-05   | 0.02005732 | 7.35209428 | 6.66204742 | 6.9060309  | 6.45178074 | 5.31576566 | 5.48405157 | 5.22438069 |
| Olfrr1314   | 1.34947418 | 3.48733266 | 0.00118305 | 0.04296425 | 4.58705563 | 4.23329977 | 3.39163624 | 4.05072329 | 2.66370343 | 2.95312195 | 2.53178829 |
| Gm8165      | 1.34877726 | 5.25393788 | 0.00140376 | 0.0448196  | 6.44923531 | 5.6111425  | 6.0783463  | 5.207057   | 4.49718581 | 4.58935805 | 4.3764602  |
| Olfrr36     | 1.34132137 | 3.41558027 | 0.00115595 | 0.04252446 | 4.4611332  | 3.37442553 | 3.81110224 | 4.31506818 | 2.78114775 | 3.16702249 | 2.4051625  |
| multi       | 1.33768302 | 5.07956121 | 0.00020006 | 0.02537506 | 6.14231464 | 5.45517497 | 5.70656604 | 5.30736007 | 4.0182996  | 4.32165103 | 4.22203174 |
| Olfrr963    | 1.33740669 | 3.66948288 | 0.00051806 | 0.02345815 | 4.61709466 | 4.03135527 | 4.60967475 | 3.71250402 | 2.94814049 | 2.90641875 | 2.86119221 |
| Gm16233     | 1.32942507 | 5.35921491 | 0.00083439 | 0.0384683  | 6.21869549 | 6.33577    | 5.9144994  | 5.24690915 | 4.59908467 | 4.58314618 | 4.61639948 |
| Vmmr197     | 1.32875131 | 4.00489684 | 0.00128841 | 0.0442198  | 5.07964488 | 4.05919191 | 4.9672145  | 4.19139546 | 3.34796087 | 3.25365627 | 3.13521398 |
| multi       | 1.32263201 | 4.64426727 | 0.00108468 | 0.04217461 | 5.88114276 | 5.22890891 | 4.65639413 | 5.07799243 | 3.82064927 | 3.91444372 | 3.93033966 |
| multi       | 1.32263201 | 4.64426727 | 0.00108468 | 0.04217461 | 5.88114276 | 5.22890891 | 4.65639413 | 5.07799243 | 3.82064927 | 3.91444372 | 3.93033966 |
| multi       | 1.27732975 | 4.62329698 | 0.00113998 | 0.04242225 | 5.50366934 | 4.56267479 | 5.51807778 | 5.09847416 | 3.60487562 | 4.00505701 | 4.07025019 |
| multi       | 1.27732975 | 4.62329698 | 0.00113998 | 0.04242225 | 5.50366934 | 4.56267479 | 5.51807778 | 5.09847416 | 3.60487562 | 4.00505701 | 4.07025019 |
| Cypt14      | 1.27244775 | 3.55063646 | 0.00086239 | 0.03881916 | 4.69027735 | 4.21744064 | 3.66831616 | 3.80785071 | 2.72498386 | 2.83287492 | 2.91271161 |
| Mir467f     | 1.27038797 | 10.6034437 | 0.00061661 | 0.03450916 | 11.5447345 | 11.0620217 | 11.3207613 | 10.6640654 | 9.6891892  | 10.1801798 | 9.76316324 |
| Mir669b     | 1.26592028 | 4.85303347 | 0.00019058 | 0.02537506 | 5.64516239 | 5.62791486 | 5.24379765 | 5.06540804 | 4.05459405 | 4.38407753 | 3.95027978 |
| Leoc3       | 1.2627497  | 6.28822796 | 0.00056534 | 0.03320372 | 6.78755561 | 6.54534446 | 7.38042711 | 6.60420842 | 5.44704316 | 5.83057357 | 5.42235337 |
| Olfrr1167   | 1.262442   | 4.2195247  | 0.00041257 | 0.02932682 | 5.00082521 | 4.23879828 | 5.1121362  | 4.69065904 | 3.49075348 | 3.59910482 | 3.40461283 |
| Olfrr961    | 1.25232682 | 3.66147896 | 0.00051765 | 0.03245815 | 4.23594603 | 4.32331439 | 3.6351229  | 4.5983785  | 2.88818303 | 3.05434896 | 2.89505892 |
| Plag210os   | 1.24167295 | 6.90705151 | 0.00127161 | 0.0441793  | 7.73742526 | 7.02820023 | 7.96848692 | 7.02267583 | 6.1550977  | 6.19517214 | 6.24233042 |
| 170010Bo8R  | 1.2383992  | 4.91360324 | 0.00097075 | 0.04021101 | 4.9718179  | 6.06053072 | 5.46225184 | 5.28278254 | 4.14285297 | 4.27899378 | 4.1959929  |
| Cd209c      | 1.23718234 | 5.54993067 | 0.00029393 | 0.02700533 | 6.06921843 | 6.09500293 | 6.51685551 | 5.63952983 | 4.91490645 | 4.83141716 | 4.78258439 |
| 4930519F09F | 1.22927844 | 6.5676182  | 0.00020417 | 0.02537506 | 7.33209604 | 7.04142676 | 7.35180001 | 6.65065534 | 5.86688579 | 5.79680847 | 5.93645673 |
| multi       | 1.22344982 | 4.89639376 | 6.16E-05   | 0.02078215 | 5.57627363 | 5.51443777 | 5.39624881 | 5.19595739 | 4.08739042 | 4.46010595 | 4.04434236 |
| multi       | 1.21918769 | 5.00591223 | 0.00072156 | 0.03663821 | 5.86081747 | 5.44013657 | 5.8178894  | 4.99484153 | 4.1140382  | 4.43891882 | 4.37474363 |
| Gm13276     | 1.21137047 | 4.78760696 | 5.88E-05   | 0.02078215 | 5.57558236 | 5.26026151 | 5.18044346 | 5.21077562 | 4.07371309 | 4.30340471 | 3.90943001 |
| Gm12880     | 1.20974643 | 3.45887575 | 0.00189336 | 0.04968372 | 4.68435527 | 3.85932559 | 3.74837272 | 3.61610034 | 2.56482601 | 2.98964973 | 2.74740048 |
| D730045A05l | 1.20587274 | 3.53252974 | 0.00021016 | 0.02537506 | 4.43044072 | 4.08899732 | 4.03895295 | 3.63893158 | 2.82069787 | 2.82257333 | 2.88710761 |
| Pr12c5      | 1.20170459 | 3.72334401 | 0.00131183 | 0.0445013  | 4.64106957 | 3.76659737 | 4.55080633 | 4.02596764 | 2.82412182 | 2.9216637  | 3.3641815  |
| Gm13271     | 1.1909035  | 5.58132484 | 8.20E-05   | 0.02078215 | 6.12986238 | 6.24672751 | 5.94423843 | 6.0460199  | 4.76453014 | 5.21481457 | 4.72308095 |
| Krtap5-3    | 1.18480948 | 6.6747031  | 0.0017833  | 0.04866695 | 7.5465468  | 6.81467835 | 7.65964174 | 6.70904746 | 5.9152401  | 6.06856864 | 6.00919859 |
| Gm8016      | 1.17368926 | 5.3145275  | 0.00024109 | 0.02624762 | 5.94720192 | 5.79855836 | 6.09730919 | 5.42707927 | 4.48959147 | 4.84055568 | 4.60139662 |
| Gm19757     | 1.17348202 | 4.3352865  | 0.00096692 | 0.04021101 | 5.21559889 | 4.78124774 | 5.09232681 | 4.26365664 | 3.77136951 | 3.5959946  | 3.62721193 |
| Vmm214      | 1.1655416  | 3.64195161 | 0.00152041 | 0.0458877  | 4.63299309 | 3.97010192 | 4.37535818 | 3.58742458 | 2.91872058 | 3.1016563  | 2.90042959 |
| Gm5800      | 1.16138212 | 3.86881244 | 1.51E-05   | 0.02005732 | 4.39229399 | 4.26308922 | 4.51543553 | 4.29537186 | 3.22992663 | 3.09688128 | 3.28868863 |
| Gm12887     | 1.15923482 | 4.17875722 | 0.00091006 | 0.03970412 |            |            |            |            |            |            |            |

|              |             |            |            |            |            |            |            |            |            |            |             |
|--------------|-------------|------------|------------|------------|------------|------------|------------|------------|------------|------------|-------------|
| Ssxb2        | 1.10654352  | 4.01272804 | 0.00109407 | 0.04219881 | 4.73862616 | 4.57155205 | 4.74566493 | 3.89200532 | 3.32718269 | 3.47739061 | 3.33667907  |
| Cyp4a31      | 1.10172952  | 4.37331882 | 0.00018623 | 0.02537506 | 4.92751308 | 4.64002993 | 5.19007576 | 4.62433568 | 3.72065515 | 3.82840212 | 3.68221999  |
| Gm10319      | 1.083660031 | 4.08882831 | 0.00142961 | 0.04503765 | 4.47034717 | 4.27096221 | 5.16593338 | 4.30567102 | 3.52955418 | 3.50072532 | 3.37860491  |
| Olfri511     | 1.08076435  | 4.50518874 | 0.00136555 | 0.04469082 | 5.39019199 | 4.87853965 | 5.13771873 | 4.46711547 | 3.88019237 | 4.05919439 | 3.72344057  |
| Gm13286      | 1.05306233  | 6.02268952 | 4.36E-05   | 0.02029375 | 6.6652698  | 6.43137757 | 6.41175849 | 6.38760196 | 5.5156682  | 5.46284377 | 5.28430689  |
| Vmn21r105    | 1.05236606  | 3.14250584 | 0.00068425 | 0.03599134 | 3.62469943 | 3.72590286 | 3.9187478  | 3.11552937 | 2.50751913 | 2.61961466 | 2.50478762  |
| multi        | 1.05192327  | 5.26034836 | 7.26E-05   | 0.02078215 | 5.86268661 | 5.8295725  | 5.68741621 | 5.46501517 | 4.65679186 | 4.74830095 | 4.57265524  |
| multi        | 1.05082678  | 5.02461889 | 8.64E-05   | 0.02078215 | 5.47514652 | 5.69910712 | 5.49336628 | 5.23227296 | 4.44356383 | 4.50445799 | 4.3244175   |
| Fbxw21       | 1.04968018  | 3.27730155 | 0.00081575 | 0.03846883 | 4.17568339 | 3.43776134 | 3.84877187 | 3.44644132 | 2.63798884 | 2.63901875 | 2.75544532  |
| Olfri1406    | 1.04912738  | 4.06502592 | 0.00144335 | 0.04522737 | 5.05900912 | 4.08478655 | 4.40609184 | 4.50872026 | 3.43898895 | 3.5060799  | 3.45150482  |
| Olfri978     | 1.04765642  | 4.49333193 | 8.30E-05   | 0.02078215 | 5.02023163 | 4.98640557 | 4.87899443 | 4.88367852 | 3.86085108 | 4.14001369 | 3.68314859  |
| Gm7969       | 1.04583775  | 5.06313456 | 0.0002754  | 0.02681541 | 5.74355766 | 5.46505696 | 5.69947466 | 5.13731368 | 4.4688652  | 4.49109405 | 4.43657972  |
| Vmn2r55      | 1.0433905   | 3.61949868 | 0.00015601 | 0.0249392  | 4.34519647 | 4.0125376  | 3.99897715 | 3.90995291 | 3.12798806 | 3.12340598 | 2.81843257  |
| Olfri321     | 1.03676298  | 3.47780616 | 0.00031406 | 0.02805884 | 3.97202345 | 4.14912862 | 4.0165232  | 3.55085731 | 3.02581692 | 2.88931282 | 2.74098076  |
| Pcdhb20      | 1.02969793  | 4.30475348 | 0.00033397 | 0.02842636 | 4.68161302 | 4.55469952 | 5.15229634 | 4.59560148 | 3.72737582 | 3.79647829 | 3.62520989  |
| Plat1r0      | 1.02542256  | 4.41028145 | 0.00020696 | 0.02537506 | 5.04123074 | 5.34095189 | 5.56181678 | 5.05499364 | 4.22686107 | 4.19683958 | 4.24928084  |
| Olfri386     | 1.02313919  | 2.98909651 | 2.41E-05   | 0.02005732 | 3.34890835 | 3.35990579 | 3.5816451  | 3.42983964 | 2.46462503 | 2.30755560 | 2.44377029  |
| Orm3         | 1.0208184   | 3.95154308 | 0.00014224 | 0.02361273 | 4.1553849  | 4.39665177 | 4.64648538 | 4.35762465 | 3.23452616 | 3.46790202 | 3.40222665  |
| Vpreb2       | 1.01938533  | 5.98334    | 0.00089026 | 0.03961669 | 6.8940265  | 6.24338294 | 6.42755331 | 6.11591495 | 5.28481032 | 5.4202763  | 5.49741566  |
| Gm13287      | 1.01566504  | 6.00593778 | 6.54E-05   | 0.02078215 | 6.60825199 | 6.46211708 | 6.2915412  | 6.40298093 | 5.36857165 | 5.58038055 | 5.3272109   |
| 1700108Jo1Ri | 1.01265498  | 4.77723258 | 0.00152129 | 0.0458877  | 4.67483095 | 5.49881689 | 5.2970543  | 5.37422055 | 4.27168858 | 4.3199267  | 4.0041179   |
| Kif2b        | 1.01107518  | 4.08662986 | 0.00081927 | 0.03846883 | 4.53464828 | 4.93154554 | 4.46671436 | 4.16518298 | 3.39636048 | 3.69312901 | 3.43712836  |
| multi        | 1.00327822  | 5.49435062 | 0.00012966 | 0.02109192 | 6.163826   | 5.89886668 | 5.89861136 | 5.73600395 | 4.92382978 | 5.05934947 | 4.77996709  |
| multi        | 1.00199378  | 2.909596   | 0.0002622  | 0.0268002  | 3.50808985 | 3.15094505 | 3.58833955 | 3.10871315 | 2.26479251 | 2.44310902 | 2.30318284  |
| multi        | 1.00199378  | 2.909596   | 0.0002622  | 0.0268002  | 3.50808985 | 3.15094505 | 3.58833955 | 3.10871315 | 2.26479251 | 2.44310902 | 2.30318284  |
| Gm5108       | 1.00093091  | 6.01750602 | 0.00187955 | 0.04866695 | 6.55682421 | 6.45323991 | 6.86844745 | 5.90739408 | 5.42903185 | 5.45470367 | 5.46190099  |
| Zfp772       | 1.00038047  | 5.41311801 | 0.00094467 | 0.03994288 | 6.10381507 | 5.77309468 | 6.11174764 | 5.3787526  | 4.87133692 | 4.83327723 | 4.68100194  |
| Aurkc        | 0.99881949  | 5.32666179 | 0.00084288 | 0.03860895 | 5.92611499 | 5.64388637 | 6.10096099 | 5.34794679 | 4.71119844 | 4.85684194 | 4.69968301  |
| multi        | 0.99167053  | 4.17546291 | 0.00073562 | 0.03671338 | 4.9473732  | 4.41872523 | 4.77762003 | 4.25813982 | 3.69018534 | 3.60787422 | 3.52832256  |
| multi        | 0.99063768  | 5.32583856 | 0.00033183 | 0.02842636 | 6.1041566  | 5.80038692 | 5.53766393 | 5.59338282 | 4.71268514 | 4.80581302 | 4.476058149 |
| Prl          | 0.99038093  | 3.42832529 | 0.00041346 | 0.02932682 | 3.76874367 | 3.70471548 | 4.24375026 | 3.69388761 | 2.81450713 | 3.00441866 | 2.76825419  |
| 4933408N05   | 0.98427077  | 5.63953611 | 0.00127663 | 0.0441793  | 6.23514068 | 5.66964814 | 6.46016004 | 5.88051691 | 4.96227084 | 5.15927777 | 5.1097384   |
| Cd19         | 0.98215479  | 5.27681663 | 0.00097009 | 0.04021101 | 6.35547826 | 6.19060115 | 6.32496332 | 5.71991771 | 5.0017151  | 5.40287834 | 5.09216253  |
| Gm13203      | 0.9777048   | 3.55314361 | 0.00045783 | 0.03115268 | 4.07323618 | 3.72880666 | 3.92627216 | 4.15987537 | 2.81853481 | 2.87334789 | 3.29148276  |
| Zfp936       | 0.95700625  | 5.1171996  | 0.00056325 | 0.03320372 | 5.83838373 | 5.42114082 | 5.41824855 | 5.43368272 | 4.47911434 | 4.84872698 | 4.38474257  |
| Olfri1055    | 0.9568786   | 7.54919094 | 0.00066263 | 0.03549404 | 8.29403853 | 7.93586361 | 7.99689636 | 7.61032858 | 6.92529989 | 7.1521564  | 6.92975323  |
| Olfri392     | 0.95457998  | 2.9307285  | 0.0005131  | 0.03245815 | 3.12868274 | 3.22418099 | 3.70894841 | 3.29752466 | 2.31922898 | 2.54715971 | 2.28937398  |
| Olfri466     | 0.95231473  | 3.78280377 | 0.00043079 | 0.03009983 | 4.39067032 | 4.35691386 | 3.96370819 | 4.05400508 | 3.09929913 | 3.46239573 | 3.15263587  |
| Olfri272     | 0.94980549  | 3.10030392 | 0.00071777 | 0.03663821 | 3.7321904  | 3.73161309 | 3.45963499 | 3.10601518 | 2.54075708 | 2.63362409 | 2.49829262  |
| Serpina1a    | 0.93826167  | 3.86209288 | 0.00169542 | 0.04817524 | 4.35660134 | 4.5036322  | 4.4636473  | 3.73293894 | 3.26025436 | 3.33420673 | 3.38336898  |
| multi        | 0.92711737  | 5.48154925 | 0.00038026 | 0.02891443 | 6.15321891 | 5.90993031 | 5.85274769 | 5.60054414 | 4.94010088 | 5.07591283 | 5.09216253  |
| BCo49702     | 0.92317055  | 3.68291813 | 0.00038719 | 0.02891443 | 4.4174627  | 4.02324645 | 3.5353955  | 4.02031833 | 3.08461275 | 3.15686445 | 3.2246991   |
| 4922502H24   | 0.9215857   | 4.97165494 | 0.00049348 | 0.03192308 | 5.40678721 | 4.99780674 | 5.55040353 | 5.51483747 | 4.45120297 | 4.52316791 | 4.36073273  |
| Olfri1477    | 0.91015072  | 3.24235372 | 0.00144888 | 0.04252446 | 3.69885301 | 3.76424338 | 3.89089879 | 3.17567809 | 2.70766497 | 2.68369079 | 2.77544701  |
| Vmn2r62      | 0.9097334   | 3.71550168 | 0.00040066 | 0.029123   | 4.29110286 | 3.75155305 | 4.21181813 | 4.16707566 | 3.19501165 | 3.21366165 | 3.17828879  |
| A530040E14i  | 0.89177779  | 5.15711145 | 0.00066463 | 0.03549404 | 6.9013907  | 6.29602958 | 6.47820764 | 6.4815798  | 5.71669627 | 5.68646101 | 5.53941513  |
| Tmem207      | 0.88982027  | 3.40035034 | 0.00102537 | 0.04132169 | 3.70324192 | 3.44742707 | 3.87030123 | 4.10583731 | 2.76023614 | 3.02910776 | 2.88630094  |
| Gm9785       | 0.88743762  | 4.04519996 | 0.00021738 | 0.02537506 | 4.60606538 | 4.30355423 | 4.24241151 | 4.55099033 | 3.51933533 | 3.62323057 | 3.47170784  |
| Olfri441     | 0.88476211  | 4.3102439  | 0.00018476 | 0.02537506 | 4.44934531 | 4.75729481 | 4.84404444 | 4.7070261  | 3.73426333 | 3.8646564  | 3.81507693  |
| 1700116N16Ri | 0.88344327  | 3.76951648 | 0.00135303 | 0.04466897 | 4.22018636 | 4.12914087 | 4.48771155 | 3.75550134 | 3.28299192 | 3.36360339 | 3.14577645  |
| Olfri415     | 0.87837475  | 4.38103153 | 0.00083305 | 0.03846883 | 4.66632253 | 5.05279489 | 4.44899828 | 4.4015337  | 4.01035527 | 3.85262405 | 3.77415269  |
| Gm11397      | 0.87802123  | 3.46520099 | 0.00107944 | 0.04217461 | 4.15210123 | 3.88105114 | 3.87985233 | 3.45297849 | 3.04520901 | 2.95735617 | 2.88785853  |
| Spr12h       | 0.87787514  | 4.06337711 | 0.00133519 | 0.04466897 | 4.49805451 | 4.77002857 | 4.47019407 | 4.0201601  | 3.54260261 | 3.60377534 | 3.53882449  |
| Cyp1t5       | 0.87734094  | 3.24728366 | 0.0014051  | 0.0448196  | 4.04886286 | 3.48755718 | 3.55006091 | 3.40666674 | 2.71482659 | 2.61028605 | 2.91272531  |
| Ctros        | 0.87618783  | 5.8101888  | 0.0015366  | 0.04252446 | 6.38097663 | 5.9014219  | 6.47425457 | 5.9858684  | 5.43196983 | 5.19617471 | 5.30017581  |
| Fbxw28       | 0.87540508  | 3.40065268 | 0.00185552 | 0.04929869 | 3.88351736 | 3.57046836 | 4.18875817 | 3.46056127 | 2.80154089 | 2.92009038 | 2.97962884  |
| Fbxw27       | 0.86983837  | 3.42829726 | 0.00143804 | 0.04518156 | 4.16583587 | 3.68613048 | 3.91143303 | 3.44094115 | 2.87972485 | 2.99371914 | 2.9202963   |
| Vmn2r102     | 0.86550181  | 2.93990396 | 0.0001328  | 0.02220399 | 3.24868986 | 3.46640042 | 3.31486489 | 3.21337806 | 2.31624048 | 2.53170213 | 2.48808753  |
| Ang6         | 0.86333355  | 4.11302291 | 0.0015684  | 0.0249392  | 4.30815679 | 4.45881361 | 4.58478458 | 4.58033704 | 3.50617918 | 3.71212727 | 3.64076192  |
| Cyp4a30b     | 0.86197502  | 3.96057618 | 0.00187265 | 0.04943283 | 4.29256091 | 4.6127183  | 4.51044721 | 3.90424978 | 3.39990034 | 3.61320039 | 3.39095585  |
| Gm10839      | 0.85642612  | 4.8168087  | 0.00037067 | 0.02891443 | 5.1190612  | 5.21581176 | 5.44051093 | 4.95797503 | 4.31773971 | 4.26031828 | 4.40420904  |
| 7420701103R  | 0.85394753  | 4.09815531 | 0.00080164 | 0.03837193 | 4.55382662 | 4.15923184 | 4.61152657 | 4.53194626 | 3.55642224 | 3.82938921 | 3.44474442  |
| Gm16063      | 0.84520055  | 6.67228299 | 7.14E-05   | 0.02078215 | 7.1170559  | 7.01171834 | 6.9551074  | 7.05351585 | 6.24627855 | 6.19434227 | 6.12731291  |
| multi        | 0.84410231  | 5.34471172 | 0.00160204 | 0.04710925 | 6.03422333 | 5.50164749 | 5.88131152 | 5.40869709 | 4.81211971 | 4.96475606 | 4.81022687  |
| Pramel4      | 0.84295154  | 3.92591367 | 0.00104919 | 0.04183709 | 4.64208772 | 4.0810264  | 4.3625431  | 4.06305726 | 3.48931354 | 3.42911963 | 3.41424806  |
| Gm8765       | 0.840519    | 4.45855747 | 0.00136652 | 0.04469802 | 5.23305223 | 4.69557463 | 4.76735675 | 4.57913599 | 3.93647419 | 3.93089677 | 4.06741174  |
| multi        | 0.83954225  | 3.38202663 | 0.00054456 | 0.0325996  | 3.91701242 | 3.88947669 | 3.70206666 | 3.45876604 | 2.9657808  | 2.78442077 | 2.95666303  |
| multi        | 0.8365755   | 5.09195404 | 0.00173961 | 0.0482918  | 5.74975279 | 5.2146733  | 5.67599889 | 5.16152061 | 4.57176415 | 4.69126713 | 4.57870142  |
| Pramel5      | 0.8364      |            |            |            |            |            |            |            |            |            |             |

Table with 13 columns of numerical data and 10 rows of text labels (e.g., Gm5535, Gm20110, 1700024B18R, etc.).

|             |            |            |            |            |            |            |            |            |            |            |            |
|-------------|------------|------------|------------|------------|------------|------------|------------|------------|------------|------------|------------|
| 4930431F12R | 0.63939225 | 3.66373448 | 0.00098358 | 0.04025325 | 4.01398601 | 4.07096496 | 3.74919672 | 3.91689121 | 3.29598079 | 3.35179495 | 3.24732669 |
| Olftr323    | 0.63818081 | 4.03255745 | 0.00163994 | 0.04771179 | 4.41352995 | 4.28696648 | 4.3161471  | 4.20761052 | 3.43935957 | 3.81681538 | 3.74747315 |
| 1700029B22F | 0.63744005 | 5.27523954 | 0.00052057 | 0.03245815 | 5.51403908 | 5.56387517 | 5.59465396 | 5.52114432 | 5.0206923  | 4.89697345 | 4.81529849 |
| 9030619Po8F | 0.63604316 | 4.27481854 | 0.00186323 | 0.04933547 | 4.71015201 | 4.34951725 | 4.49405378 | 4.63591084 | 3.81780322 | 4.06329752 | 3.85299519 |
| A730049H05  | 0.63529285 | 3.41709162 | 0.00156958 | 0.04662341 | 3.54849164 | 3.65701398 | 3.82095425 | 3.73098006 | 3.12906099 | 3.17193232 | 2.86120809 |
| AA543401    | 0.63465521 | 5.36145594 | 0.0011709  | 0.04279449 | 5.59106215 | 5.53379301 | 5.59405051 | 5.81365844 | 4.99548608 | 4.88127821 | 5.11869316 |
| Slc25a47    | 0.63312708 | 5.49226463 | 0.00170119 | 0.04817524 | 6.0030473  | 5.5727188  | 5.73309783 | 5.7455553  | 5.14764135 | 5.06672113 | 5.17707072 |
| Gm16861     | 0.63101632 | 5.68817615 | 0.00192148 | 0.04980749 | 6.12867747 | 5.95764496 | 5.98857087 | 5.75955355 | 5.27729763 | 5.48864607 | 5.21684248 |
| H2-M10.6    | 0.62993593 | 4.04524907 | 0.00078097 | 0.03776876 | 4.28708882 | 4.45051076 | 4.28387825 | 4.22912828 | 3.71716287 | 3.75221175 | 3.59767814 |
| A530021J07R | 0.62250136 | 4.40492179 | 0.00147443 | 0.045708   | 4.80906826 | 4.73078846 | 4.70518464 | 4.44179097 | 3.98643539 | 4.08092818 | 4.0802566  |
| Olftr325    | 0.61992052 | 3.3118946  | 0.00054423 | 0.0325996  | 3.59168106 | 3.50968221 | 3.60311136 | 3.60582468 | 2.90320732 | 2.9216683  | 3.0480873  |
| D830032E09  | 0.61946353 | 3.70143085 | 0.00128563 | 0.04418889 | 4.10949223 | 3.96695175 | 4.03179905 | 3.75941783 | 3.38804454 | 3.33063326 | 3.32677767 |
| 5430404P10F | 0.6176583  | 4.66939441 | 0.00134169 | 0.04466897 | 4.92630421 | 5.0805771  | 4.92706199 | 4.79751861 | 4.21542418 | 4.45253733 | 4.28633743 |
| Gm14268     | 0.6136946  | 5.09519081 | 0.00152901 | 0.04606111 | 5.23723903 | 5.3299329  | 5.45589675 | 5.40974244 | 4.87120987 | 4.56530112 | 4.79701355 |
| Prss33      | 0.61362196 | 5.8002217  | 0.00093652 | 0.03983438 | 6.16399567 | 6.04154286 | 6.05605556 | 5.99076607 | 5.38274891 | 5.58975202 | 5.37624081 |
| Gm16907     | 0.60817617 | 5.15759978 | 0.0011822  | 0.04219881 | 5.54469078 | 5.41067766 | 5.56116571 | 5.25423558 | 4.75537174 | 4.82330669 | 4.45513319 |
| Mb          | 0.60800232 | 5.71685455 | 0.00192128 | 0.04980749 | 6.04674923 | 5.96428577 | 6.11309697 | 5.78557593 | 5.4941574  | 5.37180734 | 5.24230922 |
| Slco1a1     | 0.6073327  | 2.91942419 | 0.00149453 | 0.0458877  | 3.19826754 | 3.08367508 | 3.38208909 | 3.0548068  | 2.59122311 | 2.61605761 | 2.50985007 |
| Dnmt3aos    | 0.60729719 | 4.325456   | 0.0010638  | 0.04206153 | 4.6160063  | 4.68374203 | 4.40941994 | 4.63373664 | 4.03144704 | 3.97657797 | 3.92726211 |
| Prss35      | 0.60681405 | 5.5114255  | 0.00091257 | 0.03970412 | 5.73417371 | 5.57158659 | 5.84376766 | 5.73712206 | 5.30045726 | 5.05152529 | 5.14371673 |
| Tdbi5       | 0.6052528  | 4.85950797 | 0.00122265 | 0.04369246 | 5.1797466  | 5.18627955 | 5.14553302 | 4.96404893 | 4.44267418 | 4.63998011 | 4.45829339 |
| Platr26     | 0.60347354 | 5.09642894 | 0.00177026 | 0.04866695 | 5.4203717  | 5.33864038 | 5.4783113  | 5.18291845 | 4.70063773 | 4.65780554 | 4.89703548 |
| Slc16a4     | 0.58838505 | 3.29484481 | 0.00132809 | 0.04466897 | 3.49394992 | 3.41607983 | 3.59957719 | 3.67843239 | 2.95051276 | 2.88829732 | 3.03706426 |
| Gm4224      | 0.58616629 | 4.11542523 | 0.00118942 | 0.04296425 | 4.21657462 | 4.47952164 | 4.36829748 | 4.4021637  | 3.72482412 | 3.83656351 | 3.78003157 |
| Gm13580     | 0.58499661 | 4.91229735 | 0.00179232 | 0.04866695 | 6.26189777 | 5.02451209 | 5.26330316 | 5.1023277  | 4.68400445 | 4.5536327  | 4.45536327 |
| Gm7133      | 0.58472316 | 2.62050279 | 0.00138143 | 0.04478539 | 3.0214755  | 2.82439668 | 2.90637522 | 2.73214632 | 2.23727273 | 2.34479919 | 2.27705387 |
| Slc24a5     | 0.57875285 | 3.65715293 | 0.00138691 | 0.0448196  | 4.0006529  | 3.82975427 | 3.99975439 | 3.79118551 | 3.24196521 | 3.35885558 | 3.37849124 |
| Hs3st2      | 0.56621326 | 4.59812926 | 0.00080439 | 0.03842244 | 4.81106654 | 4.81638028 | 4.87893847 | 4.85678308 | 4.30760871 | 4.30622928 | 4.20989851 |
| Gm5570      | 0.55954424 | 2.70968414 | 0.00174251 | 0.0482918  | 2.94796366 | 3.08155287 | 2.97739879 | 2.79103992 | 2.41943292 | 2.42293547 | 2.32746534 |
| Sftp        | 0.55886669 | 5.48286607 | 0.00177489 | 0.04866695 | 5.72599685 | 5.78337189 | 5.78459703 | 5.59524712 | 5.20353869 | 5.25237659 | 5.03493433 |
| Pr18a9      | 0.5552519  | 3.41952673 | 0.00141972 | 0.0448196  | 3.63248593 | 3.78915486 | 3.60149799 | 3.60682853 | 3.03203193 | 3.10165571 | 3.17303214 |
| Gm9916      | 0.55254184 | 5.48390697 | 0.00129625 | 0.04422927 | 5.81548429 | 5.6575038  | 5.71473647 | 5.69511792 | 5.13249689 | 5.26038383 | 5.11162562 |
| 4930523O13F | 0.54664855 | 3.10196293 | 0.00117193 | 0.04279449 | 3.17971615 | 3.20858376 | 3.28286663 | 3.30979699 | 2.64244553 | 2.59459523 | 2.69837521 |
| Oog2        | 0.53985285 | 2.94575781 | 0.00141671 | 0.0448196  | 3.24711741 | 3.09448874 | 3.16000876 | 3.20687836 | 2.55694368 | 2.65349079 | 2.70137193 |
| Aldoat1     | 0.53132541 | 4.63490563 | 0.00179427 | 0.04866695 | 4.85538148 | 4.89647392 | 4.93451366 | 4.76409702 | 4.31983893 | 4.24874923 | 4.42529018 |
| Gm12789     | 0.51999563 | 4.35896166 | 0.00179538 | 0.04866695 | 4.63713196 | 4.66188514 | 4.50640357 | 4.52184702 | 4.01134005 | 4.1175687  | 4.05655514 |
| Naa25       | -0.5263585 | 5.64916677 | 0.00151459 | 0.0458877  | 5.39395148 | 5.46730217 | 5.4992973  | 5.33378733 | 5.91075602 | 5.97712827 | 5.96194485 |
| Fbx17       | -0.5287284 | 4.88024352 | 0.00171505 | 0.04817524 | 4.66939058 | 4.52521995 | 4.72429929 | 4.69575369 | 5.13915825 | 5.17959162 | 5.22836474 |
| Suc1e2      | -0.5357177 | 5.48958845 | 0.00156127 | 0.04646069 | 5.25875242 | 5.2183599  | 5.22985562 | 5.33301273 | 5.70349429 | 5.78763631 | 5.89600791 |
| Midn        | -0.5372135 | 6.06728756 | 0.00165337 | 0.0478374  | 5.33371581 | 5.8636711  | 5.74284331 | 5.90798267 | 6.45386005 | 6.39263477 | 6.27630522 |
| Pmm1        | -0.5399427 | 5.23209435 | 0.00173032 | 0.0482918  | 4.99541537 | 4.93284707 | 5.09413279 | 4.98036607 | 5.65939786 | 5.65757864 | 5.49676203 |
| Kmt5b       | -0.5614057 | 6.00356376 | 0.00107852 | 0.04217461 | 5.64369692 | 5.82092729 | 5.77949624 | 5.82567931 | 6.35786118 | 6.31617290 | 6.29906781 |
| Gm20100     | -0.5660737 | 3.53335381 | 0.00152129 | 0.0458877  | 3.20589067 | 3.22038089 | 3.45349583 | 3.28330857 | 3.81448309 | 3.92001909 | 3.9359709  |
| Slc27a1     | -0.5663136 | 5.31332575 | 0.00124648 | 0.04394037 | 5.09681511 | 5.05269232 | 4.99503494 | 5.13793732 | 5.64724834 | 5.73564664 | 5.52790561 |
| Edm2        | -0.5687734 | 6.70587962 | 0.001403   | 0.0448196  | 6.54332308 | 6.36371726 | 6.38383762 | 6.55760032 | 7.11186137 | 6.97799952 | 7.00281816 |
| Idh2        | -0.5736403 | 5.95400855 | 0.00182715 | 0.04904603 | 5.70093474 | 5.73689716 | 5.67989298 | 5.7149259  | 6.08114616 | 6.39334115 | 6.37092173 |
| Arhgap35    | -0.5765741 | 5.91204499 | 0.00168281 | 0.04816089 | 5.76940034 | 5.79090476 | 5.58665582 | 5.51280624 | 6.24025608 | 6.20525259 | 6.2790391  |
| Smarca4     | -0.5783546 | 6.85340726 | 0.00121844 | 0.04363108 | 6.63061823 | 6.63850666 | 6.45797178 | 6.69506727 | 7.20370912 | 7.23380043 | 7.11477732 |
| Tmed3       | -0.5832081 | 5.75057774 | 0.00184823 | 0.04927293 | 5.49275694 | 5.4456922  | 5.38330492 | 5.68077164 | 5.96668426 | 6.13053095 | 6.15430326 |
| Nelfa       | -0.5890796 | 6.09123428 | 0.00179287 | 0.04866695 | 5.7122455  | 5.8915457  | 5.76863967 | 5.98265556 | 6.41270049 | 6.55272314 | 6.31812986 |
| Goras2p     | -0.597634  | 5.515651   | 0.00070705 | 0.03645311 | 5.28638457 | 5.26663446 | 5.28414142 | 5.34492802 | 5.81873685 | 5.99504747 | 5.86568418 |
| Utp20       | -0.5987015 | 4.67125324 | 0.00053956 | 0.03259372 | 4.42628185 | 4.34388529 | 4.45028572 | 4.4382146  | 5.00884298 | 5.00356174 | 5.02770047 |
| Eef2        | -0.605254  | 9.80787136 | 0.00173221 | 0.0482918  | 9.49595428 | 9.37084576 | 9.56241365 | 9.76469345 | 10.1393775 | 10.1669779 | 10.152137  |
| Pgf5        | -0.6053009 | 5.2476834  | 0.00158362 | 0.04687553 | 5.0582617  | 4.85830893 | 5.00460526 | 5.03189904 | 5.42494728 | 5.74283676 | 5.61292479 |
| Ap1b1       | -0.6142147 | 6.73979174 | 0.00090846 | 0.03970412 | 6.49120367 | 6.40245555 | 6.39306711 | 6.6192141  | 7.14416436 | 7.12146447 | 7.00664691 |
| Mtmr4       | -0.6181257 | 5.58264818 | 0.00187969 | 0.0494463  | 5.51861991 | 5.18593222 | 5.3310988  | 5.17328681 | 5.93627027 | 5.85265246 | 6.01866578 |
| Dopey1      | -0.6221774 | 4.86201681 | 0.00192133 | 0.04980749 | 4.45110524 | 4.52535408 | 4.70896379 | 4.69605437 | 5.34307398 | 5.27865589 | 5.03091033 |
| Ankrd50     | -0.6227283 | 5.81892469 | 0.00161138 | 0.04716874 | 5.56110001 | 5.50601729 | 5.67614841 | 5.46489885 | 6.31764355 | 5.97405053 | 6.23260972 |
| Rnaes1      | -0.6235127 | 6.0747173  | 0.00076951 | 0.0373689  | 5.83738244 | 5.74982469 | 5.71026856 | 5.93251456 | 6.42042009 | 6.36500506 | 6.5076057  |
| Zmynd8      | -0.6295837 | 6.39944718 | 0.00152068 | 0.0458877  | 5.98582049 | 6.24545749 | 6.0080855  | 6.27913888 | 6.71684888 | 6.86963138 | 6.69114763 |
| Plekha1     | -0.6340719 | 4.91101643 | 0.00128346 | 0.0441793  | 4.43666594 | 4.6478315  | 4.64362019 | 4.82896769 | 5.28510099 | 5.30543399 | 5.22949474 |
| Fubp3       | -0.6366391 | 6.05084812 | 0.0013251  | 0.04466897 | 5.6873249  | 5.67011743 | 5.78153844 | 5.97303032 | 6.28343584 | 6.46145911 | 6.49903075 |
| Fbxo18      | -0.6370408 | 5.81642872 | 0.00100543 | 0.04098247 | 5.52097452 | 5.50379397 | 5.53545367 | 5.61342277 | 6.05244215 | 6.11535054 | 6.37356315 |
| Pak2        | -0.6409369 | 6.53685136 | 0.00126178 | 0.0441793  | 6.14836529 | 6.34570191 | 6.2180052  | 6.33658414 | 7.07887189 | 6.74425456 | 6.88617653 |
| Ncbp2       | -0.6422529 | 5.21679492 | 0.00102247 | 0.04132169 | 4.80238712 | 5.0815415  | 4.81748999 | 5.06475607 | 5.58784935 | 5.58295466 | 5.58058576 |
| multi       | -0.6507436 | 5.99134732 | 0.00134612 | 0.04466897 | 5.61074677 | 5.71221236 | 5.84510183 | 5.68176778 | 6.21639492 | 6.56840374 | 6.30480384 |
| Pip5k1c     | -0.6543859 | 6.43137347 | 0.00171309 | 0.04817524 | 6.12539659 | 6.06472714 | 6.04140233 | 6.37216346 | 6.98387867 | 6.74871458 | 6.68333115 |
| Sfn         | -0.6625226 | 6.26812626 | 0.00179768 | 0.04866695 | 5.84297357 | 6.12037503 | 5.8622378  | 6.1116563  | 6.79474855 | 6.45509756 | 6.69028569 |
| Sympk       | -0.6655548 | 6.64893375 | 0.00146122 | 0.04554292 | 6.31840747 | 6.18547069 | 6.34088804 | 6.60734336 | 6.95997075 | 7.14511494 | 6.98156097 |
| Map3k4      |            |            |            |            |            |            |            |            |            |            |            |

|          |            |            |            |            |             |            |             |             |            |            |            |
|----------|------------|------------|------------|------------|-------------|------------|-------------|-------------|------------|------------|------------|
| Mavs     | -0.7051584 | 5.83620045 | 0.00063891 | 0.0350935  | 5.55711354  | 5.55164458 | 5.49067978  | 5.53652091  | 6.06978187 | 6.19760673 | 6.45005571 |
| Rere     | -0.7086469 | 5.87521331 | 0.00092048 | 0.03970412 | 5.66125881  | 5.40751166 | 5.69942709  | 5.51783249  | 6.28332575 | 6.44175008 | 6.11538732 |
| Didoi    | -0.7090989 | 6.07783704 | 0.00184235 | 0.04922814 | 5.67411167  | 5.85367158 | 5.58813445  | 5.97983231  | 6.55049059 | 6.63978068 | 6.25883796 |
| Kdm6b    | -0.711143  | 6.39040091 | 0.00155679 | 0.04646069 | 6.24442373  | 5.94446499 | 5.94096295  | 6.21264977  | 6.95302556 | 6.85598052 | 6.58082187 |
| Zfp780b  | -0.7135998 | 5.05604356 | 0.00026734 | 0.02681541 | 4.66277975  | 4.69263417 | 4.83550518  | 4.80994128  | 5.39648157 | 5.47645388 | 5.51850909 |
| Dynll2   | -0.7154011 | 6.11586835 | 0.00157691 | 0.04678178 | 5.59353963  | 5.90370749 | 5.64814603  | 6.09231083  | 6.50805258 | 6.53599875 | 6.52995566 |
| multi    | -0.7203465 | 5.07123356 | 0.00128216 | 0.0441793  | 4.77604814  | 5.04700121 | 4.63976634  | 4.58723879  | 5.3955412  | 5.46667228 | 5.58636697 |
| Wdr70    | -0.7245296 | 5.54763341 | 0.0006705  | 0.03549404 | 5.20469396  | 5.15841868 | 5.13817444  | 5.4471958   | 6.03889362 | 5.8146679  | 6.0313895  |
| Scap     | -0.7347629 | 6.75741016 | 0.00082312 | 0.0384683  | 6.33554246  | 6.39971199 | 6.36174375  | 6.67304899  | 7.33322736 | 7.16026009 | 7.0383365  |
| Setbp1   | -0.734787  | 5.28325092 | 0.00171886 | 0.04817524 | 4.71572069  | 5.28875469 | 4.92567154  | 4.94322194  | 5.64070781 | 5.81472699 | 5.65395279 |
| Gipe1    | -0.7377514 | 6.15051787 | 0.00169999 | 0.04817524 | 5.56369599  | 5.8925739  | 5.9942272   | 5.88681225  | 6.49051359 | 6.4196757  | 6.80608096 |
| Usp36    | -0.7413145 | 5.68734083 | 0.00052731 | 0.03256134 | 5.27955426  | 5.2663985  | 5.52767765  | 5.40490811  | 6.02046704 | 6.27746497 | 6.03491532 |
| Csnk1g2  | -0.7459052 | 6.97257849 | 0.00166566 | 0.04807405 | 6.65552063  | 6.64691114 | 6.39869187  | 6.91049566  | 7.5166645  | 7.19350385 | 7.48626179 |
| Nde1     | -0.7461372 | 5.94662576 | 0.00100769 | 0.04098247 | 5.56956235  | 5.60916008 | 5.43776011  | 5.89092727  | 6.46009356 | 6.43590842 | 6.2229676  |
| Brwd1    | -0.7509712 | 5.06567592 | 0.00078807 | 0.03795531 | 4.77231127  | 4.88046001 | 4.45228696  | 4.87026628  | 5.50482829 | 5.53534274 | 5.44423589 |
| Usp19    | -0.7523214 | 6.946056   | 0.00149577 | 0.0458877  | 6.53934768  | 6.58422807 | 6.54876018  | 6.8223485   | 7.4993327  | 7.5505222  | 7.0778527  |
| Zc3h12d  | -0.7547146 | 6.33185295 | 0.00073534 | 0.03671338 | 6.00289219  | 6.20980805 | 6.08209304  | 5.73882202  | 6.80432194 | 6.73050332 | 6.75453308 |
| Cux1     | -0.7556442 | 5.831632   | 0.00046748 | 0.03133421 | 5.34647761  | 5.63263748 | 5.42405223  | 5.62797055  | 6.30010729 | 6.34955889 | 6.14061996 |
| Usp1     | -0.759858  | 5.47601953 | 0.00031983 | 0.02814171 | 5.21369414  | 5.07076695 | 5.0126508   | 5.2863525   | 6.0041621  | 5.85438494 | 5.87212619 |
| Urb1     | -0.7607734 | 5.33873182 | 0.00097381 | 0.04021101 | 4.93805728  | 5.13842906 | 4.97565407  | 5.01860398  | 5.69809633 | 6.05255783 | 5.56972419 |
| Cdk2     | -0.7612049 | 5.46713045 | 0.00038945 | 0.02891443 | 5.25225976  | 5.07063132 | 4.96461104  | 5.29609703  | 5.89190422 | 5.96338426 | 5.86602552 |
| Mir7075  | -0.7628788 | 8.06673378 | 0.0006413  | 0.0350935  | 7.54429676  | 7.74042934 | 7.68052468  | 7.99389217  | 8.50872293 | 8.56843989 | 8.43083069 |
| multi    | -0.7653835 | 5.93311522 | 0.00082574 | 0.0384683  | 5.28384874  | 5.74072521 | 5.69724155  | 5.69855932  | 6.35987725 | 6.36133789 | 6.39021662 |
| Cpsf1    | -0.7705227 | 6.46184849 | 0.00134782 | 0.04466897 | 5.90219973  | 6.0181928  | 6.33006021  | 6.27604518  | 6.69551897 | 7.04468482 | 6.96623768 |
| Tec3     | -0.7712286 | 5.24487881 | 0.00188009 | 0.0494463  | 4.96783452  | 5.2581095  | 4.62893336  | 4.80253163  | 5.78075604 | 5.58966332 | 6.75453328 |
| Nup54    | -0.7723069 | 5.39359713 | 0.00040072 | 0.029123   | 5.14065102  | 4.95629868 | 4.93752491  | 5.21595924  | 5.86358597 | 5.70175688 | 5.93940324 |
| Ubf1d    | -0.7725574 | 5.98993527 | 0.00075944 | 0.03734488 | 5.43385275  | 5.79377652 | 5.652634617 | 5.84535092  | 6.30648452 | 6.51416121 | 6.47357513 |
| Galt6    | -0.773864  | 6.54050527 | 0.00084696 | 0.038645   | 6.32610202  | 6.21838872 | 6.04297329  | 6.24189464  | 6.82111243 | 7.25117399 | 6.88189178 |
| Afgf1    | -0.7780243 | 7.79388661 | 0.0017118  | 0.04817524 | 7.41786702  | 7.3695573  | 7.35933377  | 7.69503238  | 8.03483191 | 8.55294438 | 8.12763949 |
| Tyh3     | -0.7783752 | 7.57096487 | 0.00106299 | 0.04260153 | 7.02382741  | 7.17385426 | 7.15422025  | 7.23759999  | 7.98981189 | 8.5858776  | 8.18185251 |
| Rhou     | -0.7828202 | 5.0742769  | 0.00141715 | 0.0448196  | 4.91436551  | 4.6953317  | 4.5755407   | 4.76224656  | 5.59482775 | 5.21844384 | 5.75918225 |
| Atf1     | -0.7889093 | 5.86269831 | 0.00122528 | 0.04371987 | 5.36489428  | 5.35198572 | 5.6027041   | 5.77879324  | 6.28238738 | 6.51717335 | 6.14095009 |
| Atxn2    | -0.7929559 | 5.58872627 | 0.00074798 | 0.0370148  | 5.21609643  | 4.98684434 | 5.43773109  | 5.35488031  | 5.91155412 | 6.04105438 | 6.17292321 |
| Atxn10   | -0.7999902 | 6.76104354 | 0.00104152 | 0.0418164  | 6.2576608   | 6.3481836  | 6.28631275  | 6.77700524  | 7.16269089 | 7.17946809 | 7.30967533 |
| Pno1     | -0.8100312 | 4.40124763 | 0.00162122 | 0.04646069 | 3.96153391  | 4.04757412 | 3.90582463  | 4.30143288  | 4.56400497 | 5.11463651 | 5.11469871 |
| Cdc20    | -0.8127576 | 5.53547432 | 0.00168844 | 0.04817524 | 5.31529515  | 5.43744406 | 4.82609011  | 5.1697692   | 5.99024579 | 5.84623027 | 6.16324566 |
| Gan      | -0.8142492 | 4.80618929 | 0.00085336 | 0.03875963 | 4.34981535  | 4.71479332 | 4.38267409  | 4.38143854  | 5.48325831 | 5.27443317 | 5.05673071 |
| Elk4     | -0.8160727 | 6.26459478 | 0.00053484 | 0.03256134 | 5.78166572  | 5.93244503 | 5.25059686  | 6.0238932   | 6.82740835 | 6.87831143 | 6.46704286 |
| Ankrd17  | -0.8177863 | 6.16345768 | 0.00173493 | 0.0482918  | 5.68726954  | 5.49664358 | 5.87048415  | 6.19751413  | 6.63724189 | 6.59753705 | 6.6575134  |
| Gabpb2   | -0.8215463 | 6.04807638 | 0.00095218 | 0.04001368 | 5.6516319   | 5.90737044 | 5.4912564   | 5.73368309  | 6.44375002 | 6.77798609 | 6.33104654 |
| Hells    | -0.8231105 | 5.19341113 | 0.00187232 | 0.04943283 | 4.86703834  | 5.09079177 | 4.65847172  | 4.74629618  | 5.33366809 | 5.73818954 | 5.9194223  |
| Dbt      | -0.824193  | 5.63791323 | 0.00091834 | 0.03970412 | 5.23309025  | 5.14704605 | 5.26572589  | 5.49206945  | 5.81723945 | 6.29766419 | 6.21173831 |
| Herc4    | -0.8250769 | 5.66950836 | 0.00147628 | 0.045708   | 5.19685179  | 5.15967471 | 5.16529789  | 5.74179142  | 6.06896184 | 6.22043727 | 6.13354359 |
| Mad2l1   | -0.8261775 | 6.62017455 | 0.0007672  | 0.0373689  | 6.31275427  | 6.42794732 | 5.93866812  | 6.38502426  | 6.95402561 | 7.14959559 | 7.17320666 |
| Tmf1     | -0.8274905 | 4.80815186 | 0.00174541 | 0.0482918  | 4.6546907   | 4.31096144 | 4.17149405  | 4.67690613  | 5.29776593 | 5.48355717 | 5.06168758 |
| Nbas     | -0.8294139 | 5.54361226 | 0.00121152 | 0.04356066 | 5.06859632  | 5.25568401 | 5.19325648  | 5.23505989  | 6.11921583 | 6.28009208 | 5.65338118 |
| Dync1h1  | -0.8394313 | 7.36826341 | 0.00164573 | 0.04773446 | 6.79524755  | 6.94538699 | 6.91109266  | 7.38231034  | 7.92330874 | 7.61500249 | 8.00550313 |
| Nfyn     | -0.8399897 | 6.01472932 | 0.00163222 | 0.0475778  | 5.57032035  | 5.48039974 | 5.4693925   | 6.09884037  | 6.40460631 | 6.51201513 | 6.56755205 |
| Pdpr     | -0.8405743 | 5.27122161 | 0.00067948 | 0.03582123 | 4.68300962  | 5.21048498 | 4.76877361  | 4.98163378  | 5.69319842 | 5.72866779 | 5.8327831  |
| Fbxo33   | -0.8425966 | 5.41778404 | 0.00186239 | 0.04933547 | 5.08164597  | 4.79936618 | 4.87054574  | 5.47512689  | 5.7623149  | 5.95546285 | 5.98002178 |
| Tnp202   | -0.8436517 | 6.7346519  | 0.00066925 | 0.03549404 | 6.30547543  | 6.61476132 | 6.05996312  | 6.148114774 | 7.15574831 | 7.18334129 | 6.21192942 |
| Zmpstc24 | -0.8480566 | 5.68957988 | 0.00018606 | 0.02537506 | 5.5061347   | 5.16427141 | 5.27998346  | 5.35411871  | 6.13643622 | 6.27193569 | 6.11417894 |
| Usp10    | -0.8513254 | 6.27460855 | 0.00057983 | 0.03341261 | 5.93465533  | 5.5833797  | 6.08569013  | 6.03529402  | 6.74780575 | 6.67959231 | 6.85584262 |
| Rab43    | -0.85194   | 6.3573218  | 0.00042309 | 0.02991918 | 6.21619686  | 6.0357826  | 5.86985262  | 5.86985192  | 6.73573675 | 7.03070216 | 6.56795959 |
| Pou5f2   | -0.8529069 | 6.02900756 | 0.00056818 | 0.03549404 | 5.43012431  | 5.88515733 | 5.85950017  | 5.47912239  | 6.46781935 | 6.49549764 | 6.56858317 |
| Rab20    | -0.8532817 | 5.27187784 | 0.0010085  | 0.04098247 | 4.60616314  | 5.03145014 | 4.95521266  | 4.95521266  | 5.51935955 | 5.97593674 | 5.98310594 |
| Gtf2f2   | -0.8534518 | 5.61129617 | 0.00101905 | 0.04126816 | 4.94814909  | 5.2630199  | 5.20022996  | 5.57072547  | 5.96510667 | 6.09575845 | 6.23608369 |
| Aff1     | -0.8562168 | 6.36198653 | 0.00029296 | 0.02700353 | 6.03145701  | 5.95707042 | 5.94381141  | 6.04780709  | 6.71249355 | 7.11563253 | 6.72563371 |
| Larp4    | -0.8576016 | 6.95329443 | 0.00106002 | 0.04206153 | 6.32491355  | 6.75887442 | 6.58192366  | 6.67729188  | 7.64400859 | 7.14928395 | 7.53676496 |
| Ankrd13c | -0.8592703 | 4.87366184 | 0.0006498  | 0.03528962 | 4.544888348 | 4.33062089 | 4.37327373  | 4.7728345   | 5.42441638 | 5.16050153 | 5.5091024  |
| Mospd2   | -0.8601082 | 4.62929574 | 0.00036971 | 0.02891443 | 3.98541015  | 4.25804917 | 4.33255187  | 4.46670052  | 5.0926331  | 5.0643873  | 5.20533809 |
| R3hdm4   | -0.8605224 | 7.41290889 | 0.00028169 | 0.02688879 | 6.91679436  | 7.24799629 | 6.89145147  | 7.12021215  | 7.87330005 | 6.9309353  | 8.0305144  |
| Ints7    | -0.8644529 | 6.2246855  | 0.00029075 | 0.02700353 | 5.71058771  | 6.02805165 | 5.65724581  | 6.02093766  | 6.71808446 | 6.72393669 | 6.71395454 |
| Tmem259  | -0.864806  | 7.54448524 | 0.00050208 | 0.03210161 | 6.92440081  | 7.85898432 | 7.27686188  | 7.20816942  | 8.12544202 | 8.17908219 | 7.81145605 |
| Thck     | -0.8728621 | 6.30261495 | 0.00168529 | 0.04816557 | 5.73980391  | 5.75057265 | 6.22132797  | 6.00242031  | 7.06434124 | 6.49709275 | 6.84274579 |
| Parp12   | -0.8729773 | 6.10269163 | 0.00080953 | 0.03842244 | 5.52453918  | 5.73059838 | 5.55154562  | 6.10755078  | 6.64852693 | 6.5414897  | 6.61459257 |
| Morc3    | -0.8731673 | 5.99166307 | 0.00142078 | 0.0448196  | 5.25331983  | 5.4951276  | 5.42517096  | 5.42517096  | 6.42104038 | 6.39975187 | 6.65105518 |
| Nedd4l   | -0.8737393 | 5.20863965 | 9.60E-05   | 0.02078215 | 4.92042951  | 4.7295513  | 4.92847217  | 4.75826684  | 5.7638559  | 5.75289972 | 5.60700212 |
| Irf4     | -0.8747122 | 5.79619675 | 0.00073453 | 0.03671338 | 5.17050578  | 5.53202742 | 5.24834193  | 5.72786051  | 6.35128052 | 6.58958539 | 6.3472309  |
| Ezr      | -0.8762472 | 7.18919761 | 0.00125392 | 0.04413601 | 6.97005168  | 6          |             |             |            |            |            |



|             |            |            |            |             |             |            |            |            |            |            |            |
|-------------|------------|------------|------------|-------------|-------------|------------|------------|------------|------------|------------|------------|
| Gdap10      | -0.898059  | 4.76506933 | 0.00056371 | 0.03320372  | 4.19554678  | 4.60485859 | 4.35281409 | 4.36752813 | 5.24404038 | 5.05575131 | 5.53494603 |
| Samd8       | -0.9008605 | 5.18512819 | 0.00149307 | 0.0458877   | 4.72968565  | 5.00039736 | 4.50165999 | 4.96443749 | 5.36574657 | 5.82225036 | 5.9117199  |
| multi       | -0.9020146 | 6.87379384 | 0.00159669 | 0.04704794  | 6.364994    | 6.66459626 | 6.09219125 | 6.82708314 | 7.28765251 | 7.36492799 | 7.5151117  |
| Trim25      | -0.9038528 | 6.65517365 | 0.00015197 | 0.02453186  | 6.08562424  | 6.26635061 | 6.2689111  | 6.45034671 | 7.05934947 | 7.28317554 | 7.17245788 |
| Abcc4       | -0.904779  | 5.61790088 | 0.00053557 | 0.03256134  | 5.37400008  | 4.9612038  | 5.43279878 | 5.1525512  | 5.9781161  | 6.32442035 | 6.10222034 |
| Wapl        | -0.9056657 | 5.86038213 | 0.00026052 | 0.02680002  | 5.27755305  | 5.49331244 | 5.38736699 | 5.72872623 | 6.27728165 | 6.38940568 | 6.26702437 |
| Prkc1       | -0.9060337 | 4.91488448 | 6.16E-05   | 0.02078215  | 4.45244077  | 4.53504774 | 4.66133486 | 4.45751396 | 5.41126747 | 5.37663377 | 5.50995278 |
| Slec2a1     | -0.9063734 | 7.28397579 | 0.00066383 | 0.03549404  | 6.75520741  | 7.01188288 | 6.74776619 | 7.06726375 | 7.64265042 | 7.65296038 | 8.11009952 |
| Kpnb1       | -0.9080143 | 6.94754601 | 0.00076516 | 0.0373689   | 6.31415753  | 6.44272594 | 6.51655369 | 6.96015096 | 7.40565136 | 7.45283715 | 7.54074544 |
| Lomp2       | -0.9132662 | 6.60704216 | 0.00109612 | 0.04219881  | 6.08064231  | 6.32219145 | 5.97293401 | 6.48680172 | 6.97133901 | 7.43043203 | 6.9849546  |
| Tnfrsf1a    | -0.9133103 | 5.75715192 | 0.00117677 | 0.04288893  | 5.10817928  | 5.31169245 | 5.29035787 | 5.75270331 | 6.26587345 | 6.08073832 | 6.49051873 |
| Zech2       | -0.9135437 | 6.10704924 | 0.0013496  | 0.04466897  | 5.36661603  | 5.95033667 | 5.68108414 | 5.86408517 | 6.91052566 | 6.56275003 | 6.41394702 |
| Nans        | -0.9145092 | 5.96533875 | 0.00178933 | 0.04866695  | 5.50109083  | 5.26796545 | 5.48492247 | 6.03964624 | 6.46262968 | 6.66373884 | 6.3373777  |
| Usp9x       | -0.91501   | 6.08088078 | 0.00178828 | 0.04866695  | 5.5314281   | 5.71979264 | 5.42105818 | 6.08265565 | 6.83049678 | 6.33423094 | 6.64650318 |
| Stx6        | -0.9158813 | 6.36720565 | 0.00070394 | 0.03637315  | 5.96821779  | 5.73349117 | 5.90306506 | 6.29396639 | 6.93320316 | 7.06161421 | 6.67688179 |
| Polh        | -0.9165112 | 5.01122907 | 0.00058536 | 0.03349989  | 4.701972919 | 4.61971811 | 4.54262789 | 4.69167909 | 5.41519322 | 5.90150083 | 5.28815518 |
| Prpf8       | -0.9178877 | 7.55764239 | 0.00055158 | 0.03284798  | 6.41678177  | 6.99958476 | 7.12350811 | 7.4861432  | 8.25214386 | 8.11069719 | 7.88360782 |
| Gpatch8     | -0.9217112 | 6.19798906 | 0.00067102 | 0.03549404  | 5.92449509  | 5.70685379 | 5.62720413 | 5.95332688 | 6.996338   | 6.4262505  | 6.75145504 |
| Atp8a1      | -0.9234565 | 5.70805398 | 0.00074586 | 0.0370148   | 5.2741913   | 5.0387373  | 5.23146827 | 5.70752293 | 6.20245287 | 6.1663271  | 6.3384503  |
| Utrn        | -0.9253887 | 6.98928188 | 0.00020871 | 0.02537506  | 6.49570776  | 6.57294054 | 6.54208686 | 6.76001178 | 7.43182027 | 7.75590725 | 7.36649871 |
| Hsp90ab1    | -0.9259446 | 9.90588919 | 0.00104907 | 0.04183709  | 9.3743529   | 9.22993768 | 9.52115688 | 9.9107757  | 10.2615557 | 10.4923528 | 10.5109296 |
| Nr1d2       | -0.9271988 | 5.71434739 | 0.00027826 | 0.02681541  | 5.19083284  | 5.54753185 | 5.44271292 | 5.08682822 | 6.25972886 | 6.33423094 | 6.1504079  |
| Sap30bp     | -0.9293198 | 5.58176255 | 0.00128302 | 0.0441793   | 5.38373881  | 4.74051563 | 5.22086666 | 5.38880947 | 6.17479769 | 5.91932433 | 6.24428526 |
| Nmt2        | -0.9298537 | 5.15250134 | 0.00066023 | 0.03549404  | 4.69546578  | 4.68762569 | 4.77858286 | 4.85429605 | 5.8141495  | 5.30091625 | 5.93647327 |
| Rbm27       | -0.9299115 | 6.57280634 | 0.00071199 | 0.032662781 | 5.88254303  | 6.01089725 | 6.49052624 | 6.3130985  | 7.1043425  | 7.21432752 | 6.99388293 |
| Map3k2      | -0.9402146 | 5.57816436 | 0.00087673 | 0.03931365  | 5.13931741  | 5.01024575 | 4.97752236 | 5.57377543 | 6.18494803 | 6.25193333 | 5.909408   |
| Slc9a6      | -0.9474332 | 5.34592193 | 0.00110518 | 0.04219881  | 4.80790174  | 4.72257357 | 4.92487147 | 5.30416979 | 6.10061474 | 5.96467353 | 5.95664616 |
| Map4k3      | -0.9487458 | 4.73853296 | 0.00093178 | 0.03983438  | 4.44524561  | 4.22921032 | 4.27301209 | 4.38024241 | 5.71093993 | 5.0322811  | 5.09879929 |
| Hnrmpab     | -0.9505769 | 8.35770549 | 0.00176117 | 0.04849861  | 7.8393606   | 7.74102584 | 7.78945311 | 8.43179921 | 8.63888055 | 9.02793848 | 9.03548076 |
| Alf1        | -0.9507494 | 6.36264455 | 0.00032101 | 0.02814171  | 5.83541709  | 5.73163337 | 6.29432656 | 5.95934506 | 6.94384369 | 6.90493235 | 6.86962636 |
| Sdad1       | -0.9533827 | 5.32647916 | 0.0011052  | 0.04219881  | 4.66797878  | 5.11066779 | 4.89758353 | 4.99531618 | 5.48472432 | 5.99320456 | 6.135879   |
| Mthfd1      | -0.9588714 | 6.17842124 | 0.00135139 | 0.04466897  | 5.70150583  | 6.01581057 | 5.50730116 | 5.84528776 | 6.47476815 | 7.12030773 | 6.58396744 |
| Senp6       | -0.9622178 | 6.25166393 | 0.00144637 | 0.04526083  | 5.5946277   | 5.79031345 | 5.65351566 | 6.35384753 | 6.82467914 | 6.70812074 | 6.87170821 |
| Dnajb1      | -0.9636766 | 6.45411465 | 0.00192436 | 0.04982668  | 5.93448666  | 6.29161016 | 5.74271661 | 6.39562818 | 6.85547577 | 7.22975063 | 6.92193451 |
| Sfsa2       | -0.9641583 | 6.34485274 | 0.00061698 | 0.03450916  | 5.76707817  | 5.78038435 | 5.77731274 | 6.20116284 | 7.04097379 | 6.58427494 | 6.62515233 |
| Gapvd1      | -0.9644909 | 6.01505115 | 0.00020758 | 0.02537506  | 5.66321221  | 5.48146483 | 5.40289729 | 5.85921729 | 6.57182004 | 6.67784788 | 6.44889851 |
| AU019823    | -0.9743029 | 5.31890138 | 0.00036574 | 0.02891443  | 5.12832052  | 4.78466639 | 4.81517185 | 4.87721325 | 5.71365738 | 6.18014635 | 5.73313395 |
| Trappc8     | -0.9773875 | 5.06297713 | 0.0010414  | 0.02119597  | 4.57259356  | 4.73769211 | 4.44740253 | 4.81869895 | 5.7364051  | 5.5165748  | 5.63423742 |
| Zfp948      | -0.9791276 | 4.76110315 | 0.00058344 | 0.03347229  | 4.32868574  | 4.19001801 | 4.17613816 | 4.67106619 | 5.04960469 | 5.41929213 | 5.49291804 |
| multi       | -0.9865059 | 5.71761432 | 0.00170221 | 0.04817524  | 4.89965227  | 5.56517635 | 5.2704569  | 5.44401871 | 6.5213199  | 5.9216639  | 6.4009911  |
| Rab12       | -0.9865444 | 5.41685771 | 0.00016769 | 0.02506756  | 4.88755193  | 4.79394615 | 5.05572609 | 5.23898837 | 6.01713565 | 5.844264   | 6.08039179 |
| Hectd1      | -0.9906793 | 6.91433011 | 0.00174806 | 0.04830806  | 6.28544382  | 6.48357758 | 6.17111124 | 7.02328041 | 7.61514631 | 7.48220025 | 7.34725068 |
| Ifih1       | -0.9911004 | 4.80668001 | 0.00127856 | 0.0411793   | 4.28019387  | 4.80418844 | 4.06250279 | 4.37840574 | 5.15116289 | 5.34151895 | 5.62458812 |
| Adss        | -0.9920399 | 6.29258026 | 0.0017536  | 0.04837221  | 5.62317601  | 5.48750367 | 6.10883697 | 6.25016449 | 6.70931271 | 6.82594524 | 7.04312272 |
| Birc3       | -0.9939469 | 6.07430784 | 0.00074997 | 0.03703484  | 5.43635639  | 5.44427194 | 5.78168899 | 5.90379771 | 6.71509267 | 6.88265482 | 6.32908504 |
| Kcmf1       | -0.9992836 | 6.28016571 | 0.00134913 | 0.04466897  | 5.97248029  | 5.47953123 | 5.67573964 | 6.279854   | 6.71487048 | 7.03768932 | 6.80094999 |
| Lpp         | -1.0043951 | 6.29690266 | 0.00127723 | 0.0441793   | 5.91129713  | 5.58606095 | 5.65926634 | 6.30922771 | 7.02333475 | 6.61527368 | 6.97385808 |
| 2310035C23f | -1.006928  | 5.56827231 | 0.00061983 | 0.03454385  | 4.93430494  | 5.25504831 | 4.85625859 | 5.50131516 | 6.2793598  | 6.14778823 | 6.00443114 |
| Trim28      | -1.0109373 | 6.59999994 | 0.00038717 | 0.02891443  | 6.17939201  | 6.00437455 | 6.0600876  | 6.42311023 | 6.92437854 | 7.45707268 | 7.15158397 |
| Runx1       | -1.0135686 | 6.53045394 | 0.00018335 | 0.02537506  | 6.14653443  | 6.1013763  | 6.01152844 | 6.12483043 | 6.99571861 | 6.90265902 | 7.43053032 |
| Rnu3a       | -1.0146029 | 7.76089371 | 0.00060965 | 0.03448015  | 7.22110236  | 7.64764206 | 7.05769632 | 7.37567628 | 8.62444471 | 8.17036069 | 8.26761819 |
| Tsc2        | -1.0223842 | 6.11733925 | 0.000566   | 0.03320372  | 5.73302095  | 5.32588428 | 5.68277869 | 5.97501448 | 6.50147411 | 6.92404062 | 6.67916159 |
| Lbh         | -1.0237748 | 6.85015164 | 0.00104972 | 0.04183709  | 6.16167855  | 5.98606828 | 6.29068795 | 6.75202036 | 7.53376972 | 7.52039247 | 7.25133519 |
| Rif1        | -1.0242054 | 5.13124405 | 0.00024977 | 0.02669562  | 4.46537325  | 4.51471306 | 4.75497648 | 5.0337688  | 5.69907931 | 5.76437107 | 5.68606237 |
| Mapki       | -1.027975  | 5.79791896 | 0.00139922 | 0.0448196   | 5.42253939  | 4.81273645 | 5.47210854 | 5.72204865 | 6.43671524 | 6.28014027 | 6.43914421 |
| multi       | -1.0323848 | 6.63241857 | 0.0008977  | 0.03967929  | 5.97817105  | 6.31070907 | 5.99971604 | 6.4775756  | 7.30092483 | 6.8700683  | 7.49606508 |
| Camk2d      | -1.0326222 | 5.57418992 | 0.00023601 | 0.02624762  | 5.03403202  | 4.83269677 | 5.22376301 | 5.43605832 | 6.18228982 | 6.09972727 | 6.21076223 |
| Bap1        | -1.0336738 | 6.34701893 | 0.00123677 | 0.0438243   | 5.96390387  | 5.69330178 | 5.91313012 | 6.04572768 | 6.52943015 | 7.39452914 | 6.88910978 |
| Fnta        | -1.0407292 | 5.99524796 | 0.00138007 | 0.04478539  | 5.33585844  | 5.69550697 | 5.35917272 | 5.80634647 | 6.35283605 | 6.37496941 | 7.04204566 |
| Ankle2      | -1.0422262 | 6.08047186 | 0.00086183 | 0.03881916  | 5.95749025  | 5.19378412 | 5.59674305 | 5.78719648 | 6.77059092 | 6.46643322 | 6.79106498 |
| Hspa9       | -1.0428487 | 6.3926312  | 0.00030028 | 0.027177    | 5.72589356  | 6.10306723 | 5.77374392 | 6.18007948 | 6.78853989 | 7.19589739 | 6.98119694 |
| Eif4a1      | -1.0446568 | 7.7813852  | 0.00115726 | 0.04252446  | 7.3083189   | 7.01506835 | 7.01287405 | 7.86043935 | 8.24773903 | 8.37575131 | 8.49974366 |
| Bach1       | -1.0451003 | 6.70436972 | 9.06E-05   | 0.02078215  | 6.14855624  | 6.1331881  | 6.1813413  | 6.56279277 | 7.30020374 | 7.28356758 | 7.32093829 |
| Vps11       | -1.0497268 | 5.92357805 | 0.00011864 | 0.02169582  | 5.20069728  | 5.51640981 | 5.48682264 | 5.69085088 | 6.39439434 | 6.54876249 | 6.62710888 |
| Hivep1      | -1.0540458 | 6.01462156 | 0.00108208 | 0.04217461  | 5.46175326  | 5.35115711 | 5.41799974 | 6.02064045 | 6.93014556 | 6.38804856 | 6.53260626 |
| P4ha1       | -1.0541785 | 5.32970145 | 0.00012684 | 0.02195948  | 4.9822727   | 4.9179692  | 4.73146008 | 4.87994072 | 5.68808221 | 5.91831831 | 6.18986694 |
| multi       | -1.0563351 | 6.19128728 | 0.00026752 | 0.02681541  | 5.4831727   | 5.74451952 | 6.05121189 | 6.6333304  | 6.72096558 | 7.02922604 | 6.92823451 |
| Cnot6       | -1.0569011 | 6.64366014 | 0.00124459 | 0.04393975  | 5.853785    | 5.96223981 | 6.22492984 | 6.72185546 | 7.34945964 | 7.12795855 | 7.26539265 |
| Ct8         | -1.0626047 | 6.7087716  | 0.00154484 | 0.04635898  | 6.22363856  | 6.1440545  | 5.92313499 | 6.72265031 | 6.96707882 | 7.52453774 | 7.45630964 |
| Stat1       | -1.064172  | 7.90964799 | 0.00178548 | 0.04866695  | 7.219       |            |            |            |            |            |            |

Table with 12 columns: Gene Symbol, Log2FC, NegLog10P, AdjP, Log2FC, NegLog10P, AdjP, Log2FC, NegLog10P, AdjP, Log2FC, NegLog10P, AdjP. Rows include genes like Herpud1, Ublc1p, Gtspb, Gtspb, Casp8ap2, Eomes, Itga6, Stat2, Gbp2, Arcn1, Cep170, Ascc3, Mem5, Bcap29, Ddx42, U2surp, Larpa4, 2610507B11Ri, Nap1l4, Eif3b, Eif3a, Slc36a4, Prkca, Rbbp7, Tctc7, Slc7a5, Zfp106, Dhcr24, AA667203, Tars, Med1, Rasaf2, Vcp, Cep350, Plg1, Mbnl2, Lor, E430025E21f, Pten, Nol8, Cdk4, Tm9sf3, Cxadr, Nfi, Sfb3b, Wdhdl1, Rpph1, Cirh1, Ppat, Mem2, Zfp143, Fosl2, Cyb5b, Atl2, Mir15a, Anoa6, Pigf, Hipk2, Caap1, Klf3, Extd3, St6gal1, Rab1b, B230219D22f, Hspa4, Fam91a1, Khdc3, Rnf2, Ptpn12, Scep1, Slc25a7, Ilra, Tmx1, P4hb, Hsph1, Brix1, Kbtbd7, Rab21, Pik3c2a, Gspt1, Smurf1, Nops8.

|          |            |            |            |            |            |            |            |            |            |            |            |
|----------|------------|------------|------------|------------|------------|------------|------------|------------|------------|------------|------------|
| Nucb2    | -1.4564055 | 5.99776156 | 0.00116906 | 0.04279449 | 5.14160569 | 5.12432923 | 5.28976933 | 5.9386468  | 6.66561557 | 6.40053448 | 7.42382981 |
| Twf1     | -1.4781886 | 5.13313525 | 0.00111656 | 0.04219881 | 4.16361766 | 4.52954471 | 4.61224594 | 4.69309513 | 6.11640784 | 5.26404409 | 6.55299136 |
| Tnks2    | -1.4799047 | 6.81420719 | 0.00080963 | 0.03842244 | 6.14596481 | 5.91332031 | 5.74306831 | 6.91749583 | 7.57117964 | 7.48967253 | 7.9187489  |
| Fbxo25   | -1.4975364 | 5.69874299 | 0.00055186 | 0.03284798 | 5.25514778 | 5.08142119 | 4.88386793 | 5.00732974 | 7.1599022  | 6.56086617 | 5.94266659 |
| Csfr     | -1.5265575 | 6.4544772  | 0.00089845 | 0.03967929 | 5.48337275 | 5.67459575 | 6.09190067 | 5.95108392 | 7.37666609 | 6.67383001 | 7.92989124 |
| Tom70a   | -1.5298237 | 5.56081526 | 0.001588   | 0.04693212 | 5.15564634 | 4.12266698 | 4.77039518 | 5.57199768 | 6.1490459  | 6.57880338 | 6.57715136 |
| Cd24a    | -1.5802272 | 7.76524577 | 0.00117818 | 0.04288893 | 5.1637339  | 7.40240759 | 7.26192078 | 7.17132037 | 8.4693479  | 8.17957463 | 9.35577574 |
| Rnu1a1   | -1.607276  | 10.0988894 | 0.00113011 | 0.04229934 | 9.0392891  | 9.58583263 | 8.92478968 | 10.0903157 | 11.472518  | 10.969177  | 10.6103033 |
| Gm4951   | -1.643948  | 4.69219495 | 0.0013572  | 0.04467153 | 4.19826074 | 4.27051956 | 4.01429525 | 3.46750771 | 5.54528786 | 4.97162472 | 6.3778688  |
| Iigp1    | -1.6443195 | 5.24363694 | 0.00071409 | 0.03663821 | 4.72525749 | 4.52310472 | 4.49197379 | 4.4153784  | 5.35374082 | 6.70527148 | 6.49073191 |
| Fads2    | -1.6650021 | 5.77103274 | 0.00082834 | 0.0384683  | 5.1991003  | 4.86031149 | 5.29427297 | 4.8761568  | 6.56017014 | 6.09159698 | 7.5156205  |
| Anpep    | -1.6824861 | 5.89989786 | 0.00037685 | 0.02891443 | 4.81716983 | 5.30020456 | 5.03499307 | 5.56296203 | 7.36047814 | 6.26347025 | 6.96000712 |
| Plk2     | -1.6915056 | 4.89075799 | 2.46E-06   | 0.01858742 | 4.43627506 | 3.96215554 | 4.15203672 | 4.11284077 | 5.85698468 | 5.84428543 | 5.8707277  |
| Rhob     | -1.6934861 | 5.27890134 | 0.00098367 | 0.04025325 | 4.57129965 | 4.49605631 | 3.97640325 | 5.16872716 | 6.51094272 | 5.61105398 | 6.61782629 |
| Clec5a   | -1.7386729 | 4.20968203 | 0.00090412 | 0.03970412 | 3.51250631 | 3.27454232 | 3.21576304 | 3.85533438 | 5.12766526 | 4.49827742 | 5.98368546 |
| Actm1    | -1.7488992 | 6.71091622 | 0.00032425 | 0.02821483 | 6.6840011  | 5.83095187 | 5.44343778 | 5.88716123 | 7.54542888 | 7.55722333 | 8.02820937 |
| Sox4     | -1.7685921 | 5.64675669 | 0.00010961 | 0.02162389 | 5.01374715 | 4.59942656 | 4.94929922 | 4.99268172 | 6.23996743 | 6.47717878 | 7.25499596 |
| Ddb1     | -1.7797946 | 6.17312588 | 0.001091   | 0.04219881 | 5.61727806 | 4.81272201 | 5.46658121 | 5.74484573 | 7.21470232 | 6.46369705 | 7.89205477 |
| Zfp266   | -1.7948315 | 5.55066307 | 0.00015769 | 0.0249392  | 5.18953777 | 4.68434713 | 4.0999331  | 5.15198035 | 6.56167856 | 6.68164255 | 6.48552205 |
| Cd2ap    | -1.8298519 | 6.1774242  | 6.29E-05   | 0.02078215 | 5.20082865 | 5.42799966 | 5.42350854 | 5.52047103 | 7.18722691 | 6.71737039 | 7.76456423 |
| Clec4a3  | -1.8763305 | 4.10432785 | 1.66E-05   | 0.02005732 | 3.01452669 | 3.02935236 | 3.518272   | 3.63859374 | 5.21295947 | 4.9594349  | 5.35715579 |
| Il6st    | -1.8796324 | 7.11660823 | 5.48E-05   | 0.02078215 | 6.59962114 | 6.04924941 | 6.22439903 | 6.37094514 | 7.92853678 | 8.74035796 | 7.90315689 |
| Mmp7     | -1.9937549 | 6.27696678 | 0.00129342 | 0.04422927 | 5.39907375 | 6.10270394 | 5.69108327 | 4.49714058 | 7.26090393 | 6.92064903 | 8.06721295 |
| Spp1     | -2.0517362 | 6.74139069 | 0.00135852 | 0.04467153 | 5.73352441 | 6.55286596 | 5.86010679 | 5.30180347 | 7.84480255 | 7.09963942 | 8.79699224 |
| Mboat1   | -2.1347667 | 6.44716701 | 0.00049643 | 0.03192308 | 5.92540761 | 5.09603449 | 5.39192356 | 5.71570237 | 7.08769075 | 7.30970908 | 8.60370121 |
| Snord14a | -2.1595738 | 5.58422368 | 0.00083576 | 0.0384683  | 4.29799984 | 3.79398787 | 5.12521271 | 5.4175677  | 6.35170557 | 7.30485959 | 6.79823249 |
| Cp       | -2.311111  | 4.39776907 | 4.42E-05   | 0.02029375 | 3.17807805 | 3.216344   | 3.77801583 | 3.45673392 | 5.04656185 | 5.92762973 | 6.18102013 |
| Chil3    | -2.4798873 | 5.93381719 | 0.00074791 | 0.0370148  | 4.72626181 | 4.92027597 | 4.553206   | 5.2842896  | 7.65884823 | 6.12259562 | 8.27124312 |
| Try10    | -2.8232187 | 6.86398383 | 0.00186071 | 0.04933547 | 6.21347454 | 4.61468956 | 6.38318333 | 5.40478446 | 9.1996749  | 9.14879778 | 7.08328226 |
| Snord70  | -2.9054431 | 3.88881777 | 5.86E-05   | 0.02078215 | 2.40220626 | 2.98675999 | 2.35801392 | 2.82753136 | 5.95180923 | 6.11381199 | 4.58159163 |
| Spink1   | -2.9881065 | 5.53097627 | 0.00189615 | 0.04970113 | 5.46813038 | 3.09149689 | 4.99352608 | 3.44828344 | 7.60532093 | 7.86825442 | 6.24182175 |
| Tff2     | -3.1191927 | 9.32350859 | 0.00010118 | 0.02095845 | 8.27455329 | 8.5034732  | 8.3310718  | 6.83774859 | 10.906761  | 10.7022341 | 11.7087182 |
| Clps     | -3.2815775 | 7.26957324 | 0.00097594 | 0.04021101 | 6.28797001 | 4.75319024 | 7.09374179 | 5.31782947 | 9.43127747 | 10.0063078 | 7.99669593 |
| Phlpp2   | -3.5880983 | 6.78498621 | 0.00030072 | 0.027177   | 5.51207281 | 4.13741936 | 6.19821282 | 5.14121416 | 9.45014181 | 9.43209931 | 7.62374323 |
| Rnase1   | -4.0529356 | 6.03694034 | 0.00150664 | 0.0458877  | 4.58204144 | 3.33647013 | 6.00641518 | 3.47494509 | 8.98556504 | 9.43670935 | 6.63643618 |

**Table S7. Differentially expressed genes between intratumoral TCRmsln cells post anti-PD-L1 at day 28; genes shown are p<0.06 (Adj)**

| SYMBOL      | logFC      | AveExpr    | P.Value    | adj.P.Val  | m1 anti-PDI | m2 anti-PDI | m1 control | m2 control | m3 control  |
|-------------|------------|------------|------------|------------|-------------|-------------|------------|------------|-------------|
| Gm4541      | 2.51198204 | 5.24736142 | 6.20E-06   | 0.02049359 | 6.9906101   | 6.51849119  | 4.33716978 | 4.2438739  | 4.14666213  |
| Gm4541      | 2.51198204 | 5.24736142 | 6.20E-06   | 0.02049359 | 6.9906101   | 6.51849119  | 4.33716978 | 4.2438739  | 4.14666213  |
| Gm4541      | 2.51198204 | 5.24736142 | 6.20E-06   | 0.02049359 | 6.9906101   | 6.51849119  | 4.33716978 | 4.2438739  | 4.14666213  |
| Gm4541      | 2.51198204 | 5.24736142 | 6.20E-06   | 0.02049359 | 6.9906101   | 6.51849119  | 4.33716978 | 4.2438739  | 4.14666213  |
| Gm4541      | 2.51198204 | 5.24736142 | 6.20E-06   | 0.02049359 | 6.9906101   | 6.51849119  | 4.33716978 | 4.2438739  | 4.14666213  |
| Olfir1140   | 1.78552508 | 3.40127855 | 1.82E-05   | 0.03015733 | 4.43972773  | 4.50549187  | 2.73910557 | 2.68748907 | 2.63457853  |
| Olfir837    | 1.69535834 | 3.6258283  | 0.000139   | 0.0542161  | 4.74500453  | 4.54108207  | 3.27494603 | 2.71125576 | 2.8568531   |
| Olfir082    | 1.63191726 | 3.64915622 | 0.00022624 | 0.05811565 | 4.42849111  | 4.82767305  | 3.05672265 | 3.23428935 | 2.69815596  |
| Taar7f      | 1.4274554  | 4.85547824 | 9.38E-05   | 0.05258791 | 5.78418928  | 5.63978585  | 4.24126972 | 4.36669687 | 4.24544949  |
| Olfir394    | 1.274373   | 3.64360457 | 0.00020865 | 0.05804847 | 4.52290771  | 4.29354902  | 3.14630872 | 3.11244858 | 3.14277279  |
| Herci       | -1.3210393 | 6.04141428 | 0.00018361 | 0.0574519  | 5.33931567  | 5.15826574  | 6.56427953 | 6.67278519 | 6.47242525  |
| Zfp507      | -1.3412448 | 5.12148388 | 0.00013395 | 0.0542161  | 4.28054026  | 4.35293374  | 5.66766958 | 5.57052191 | 5.73575394  |
| Elavl1      | -1.377902  | 4.99174666 | 0.00014379 | 0.0542161  | 4.12165347  | 4.20835742  | 5.63333594 | 5.39972495 | 5.60466152  |
| Pi4ka       | -1.3988394 | 6.2068391  | 0.00017927 | 0.0574519  | 5.47645221  | 5.25861872  | 8.86686673 | 6.84275917 | 6.58949865  |
| Mrp139      | -1.4091583 | 6.61840367 | 0.0002037  | 0.05804847 | 5.56527338  | 5.98054405  | 7.20858968 | 7.13126482 | 7.20634641  |
| Epc2        | -1.4107417 | 5.66055026 | 0.00021139 | 0.05804847 | 4.77057071  | 4.85763977  | 6.46702817 | 6.14474051 | 6.06277216  |
| Rc3h2       | -1.4222652 | 5.49382365 | 0.00016546 | 0.05499784 | 4.80311313  | 4.47693562  | 5.99583208 | 6.01219539 | 6.177884131 |
| Wnki        | -1.4289075 | 7.5361351  | 0.0002059  | 0.05804847 | 6.67980555  | 6.67777561  | 7.89090956 | 8.09164563 | 8.34053915  |
| C2cd3       | -1.484216  | 5.94844537 | 8.41E-05   | 0.05258791 | 4.95142308  | 5.16440847  | 6.56675697 | 6.60232356 | 6.457311475 |
| E430025E211 | -1.4896194 | 5.272282   | 0.00011552 | 0.05258791 | 4.27753038  | 4.47949034  | 5.72396502 | 5.85183061 | 6.02859363  |
| Atp10d      | -1.5074624 | 6.00958269 | 0.00016688 | 0.0542161  | 5.17023604  | 5.03997444  | 6.57544641 | 6.85365834 | 6.40859821  |
| Etl3l       | -1.5163405 | 5.96131764 | 0.00015589 | 0.0542161  | 5.00812531  | 5.09490137  | 6.49274281 | 6.83021886 | 6.38059988  |
| Zdhhc15     | -1.5308238 | 6.06684312 | 0.00019686 | 0.05804847 | 5.16478875  | 5.13190899  | 6.41095703 | 6.66883883 | 6.957722    |
| Gosr2       | -1.5524397 | 6.0718912  | 0.00018281 | 0.0574519  | 5.36269848  | 4.91875217  | 6.70392854 | 6.85127565 | 6.52429074  |
| Teeb1       | -1.5545239 | 6.99720435 | 7.30E-05   | 0.05258791 | 6.1570989   | 5.97188113  | 7.49428457 | 7.61640276 | 7.74635439  |
| Adipor2     | -1.5551812 | 6.40441781 | 0.00014837 | 0.0542161  | 5.68130106  | 5.26131716  | 6.89224546 | 7.17024025 | 7.0169851   |
| Csnk2a1     | -1.5856183 | 6.38149688 | 0.00022061 | 0.05804847 | 5.74089003  | 5.11934555  | 6.97355733 | 7.01124682 | 7.06244499  |
| Dusp1       | -1.5999027 | 8.11055073 | 0.00021992 | 0.05804847 | 7.35530128  | 6.94591688  | 8.47451667 | 8.82920191 | 8.94781689  |
| Tmem50b     | -1.5999238 | 6.33939975 | 0.00010196 | 0.05258791 | 5.36834402  | 5.37254691  | 6.78099581 | 7.22361533 | 6.90658672  |
| Sec24a      | -1.6091022 | 5.6874715  | 0.0001217  | 0.0537313  | 4.47571557  | 4.96485614  | 6.40283483 | 6.3268488  | 6.25848041  |
| Tsyp1l      | -1.6172846 | 8.07833353 | 0.00021876 | 0.05804847 | 6.97082139  | 7.24511615  | 8.39390224 | 8.96702114 | 8.81571571  |
| Nacc1       | -1.6327018 | 6.86992538 | 0.00015669 | 0.0542161  | 6.05806001  | 5.72254854  | 7.25379613 | 7.58733098 | 7.72789124  |
| Npat        | -1.6381982 | 5.45578651 | 0.00021611 | 0.05804847 | 4.25381349  | 4.69192168  | 5.83735999 | 6.33999894 | 6.15583848  |
| multi       | -1.6419573 | 6.65761539 | 0.00010976 | 0.05258791 | 5.59961854  | 5.74526344  | 7.03186377 | 7.11936056 | 7.49197049  |
| SmeG        | -1.6453429 | 5.59285064 | 6.41E-05   | 0.05258791 | 4.68050004  | 4.53078973  | 6.05580238 | 6.29875488 | 6.398848828 |
| Msla        | -1.6490435 | 6.55547164 | 0.00022839 | 0.05811565 | 5.89906486  | 5.23302626  | 7.18499069 | 7.32376318 | 7.13659781  |
| Rppr1       | -1.655171  | 5.52796828 | 0.00015193 | 0.0542161  | 4.5484245   | 4.52130683  | 5.93781114 | 6.10758183 | 6.52471709  |
| Ints6       | -1.6609969 | 5.3299685  | 3.93E-05   | 0.04824068 | 4.3106007   | 4.36219676  | 5.86660119 | 6.01232624 | 6.11321396  |
| Snhg5       | -1.704682  | 5.56290027 | 4.19E-05   | 0.04824068 | 4.49486857  | 4.62637019  | 6.08645777 | 6.27762242 | 6.32918237  |
| <b>Cla4</b> | -1.7167173 | 6.12924953 | 9.70E-05   | 0.05258791 | 4.86912956  | 5.32995673  | 6.96578116 | 6.65795508 | 6.82342516  |
| Tnxt1       | -1.7304068 | 6.14683447 | 0.0001181  | 0.05258791 | 5.11705056  | 5.10044215  | 6.94899768 | 6.49330133 | 7.07466655  |
| Acl5        | -1.7361752 | 6.25440076 | 8.69E-05   | 0.05258791 | 5.07985267  | 5.34595279  | 6.7290225  | 7.20274695 | 6.9154644   |
| Atfpap2     | -1.7425134 | 6.51545164 | 9.62E-05   | 0.05258791 | 5.50960898  | 5.43027825  | 7.3341154  | 6.88671944 | 7.41653615  |
| Tci         | -1.74783   | 6.28507677 | 5.60E-05   | 0.05258791 | 5.16615298  | 5.30660457  | 7.13562568 | 7.07797808 | 6.73902253  |
| Paplg       | -1.7534953 | 5.31610937 | 5.81E-05   | 0.05258791 | 4.27936366  | 4.24866067  | 6.19810531 | 5.75559398 | 6.09882324  |
| Mri         | -1.7600451 | 5.61068904 | 3.82E-05   | 0.04824068 | 4.4425818   | 4.66674003  | 6.19740321 | 6.47423202 | 6.27248813  |
| Nfkbia      | -1.7621786 | 6.99820067 | 0.0001377  | 0.0542161  | 6.1682435   | 5.7354347   | 7.4804074  | 7.97230367 | 7.6565053   |
| Gmps        | -1.7634308 | 5.87105118 | 3.43E-05   | 0.04824068 | 4.6620343   | 4.96485108  | 6.59422939 | 6.49652071 | 6.63987045  |
| Nsmf4       | -1.7823593 | 6.72789013 | 0.0001477  | 0.0542161  | 5.84351443  | 5.4734347   | 7.64121388 | 7.09413162 | 7.58715154  |
| Ranbp9      | -1.7824816 | 6.9341318  | 0.00015663 | 0.0542161  | 5.77742015  | 5.95186555  | 7.38318344 | 8.043855   | 7.514333484 |
| Ddx52       | -1.7977198 | 6.21986932 | 0.00022039 | 0.05804847 | 5.36424394  | 4.91823096  | 6.56543401 | 7.07149419 | 7.17994349  |
| Laptm4a     | -1.8103458 | 7.38134964 | 0.0002284  | 0.05811565 | 6.68186987  | 5.90841448  | 7.98543562 | 8.27610216 | 8.05492696  |
| Psmg2       | -1.824803  | 5.62945479 | 0.00010764 | 0.05258791 | 4.50620401  | 4.609924    | 6.04533164 | 6.70681022 | 6.39643908  |
| Ppp6r3      | -1.8266237 | 6.39456413 | 7.62E-05   | 0.05258791 | 5.42005611  | 5.17712376  | 6.8149534  | 7.31088368 | 7.24980372  |
| Alg3        | -1.8607569 | 6.27763736 | 0.00016119 | 0.0548868  | 5.07433062  | 5.24803579  | 6.62416379 | 7.39417816 | 7.04747846  |
| Parp4       | -1.8698475 | 5.88532383 | 0.00011701 | 0.05258791 | 4.77517845  | 4.75165224  | 6.27717379 | 7.00119509 | 6.62142407  |
| Ncbp1       | -1.8983176 | 6.06958948 | 0.00020498 | 0.05804847 | 4.80551348  | 5.05568435  | 6.35317492 | 7.14691227 | 6.98666236  |
| Zfp646      | -1.9250562 | 5.56262944 | 0.00011653 | 0.05258791 | 4.43758076  | 4.37761068  | 5.93309967 | 6.69434044 | 6.37051567  |
| Psmf7       | -1.9255831 | 6.67128464 | 0.00010259 | 0.05258791 | 5.50029064  | 5.53157897  | 7.36789623 | 7.84142573 | 7.11523165  |
| Gm8369      | -1.9300916 | 6.20962288 | 7.13E-05   | 0.05258791 | 4.84670726  | 5.25642859  | 6.71697609 | 6.99464832 | 7.23335413  |
| Cd84        | -1.9400691 | 6.37664684 | 0.0001985  | 0.05804847 | 5.58237957  | 4.84283117  | 6.94138058 | 7.43906147 | 7.07758141  |
| Fzr1l       | -1.9418466 | 6.45287482 | 5.85E-05   | 0.05258791 | 5.39910373  | 5.17643002  | 7.44792681 | 6.89870884 | 7.34220468  |
| Tug1        | -1.9570417 | 5.45445682 | 0.00018134 | 0.0574519  | 4.05541356  | 4.50506799  | 5.79680701 | 6.40157177 | 6.51346878  |
| Ufm1        | -1.962452  | 5.33951522 | 1.66E-05   | 0.02951325 | 4.2753614   | 4.822525    | 5.98783199 | 6.22487792 | 6.16077813  |
| Pck         | -2.0266588 | 6.51279342 | 7.14E-05   | 0.05258791 | 5.10720099  | 5.48639524  | 7.04954513 | 7.66440009 | 7.25642563  |
| Tespa1      | -2.1197527 | 3.6010321  | 0.00015584 | 0.0542161  | 5.3242471   | 4.822525    | 6.71661297 | 7.49870506 | 7.40869842  |
| Zfp143      | -2.1263756 | 6.08467221 | 0.0001504  | 0.0542161  | 4.74045369  | 4.87723996  | 6.54111536 | 6.79191318 | 7.47263883  |
| Lilrb4a     | -2.1599237 | 6.51594167 | 9.56E-05   | 0.05258791 | 5.5837039   | 4.856271    | 7.62922486 | 7.39592344 | 7.11458515  |
| Nduf2c      | -2.1986359 | 6.8645182  | 7.89E-05   | 0.05258791 | 5.33644536  | 5.75422792  | 7.85982179 | 8.05655729 | 7.31553864  |
| Rgs2        | -2.226819  | 5.59955805 | 0.0001086  | 0.05258791 | 5.34302599  | 5.00390735  | 6.97818326 | 7.34411223 | 7.87856141  |
| Ppp2cb      | -2.2334832 | 6.1150749  | 4.20E-05   | 0.04824068 | 4.75642782  | 4.79350685  | 6.57582767 | 7.17766578 | 7.27185934  |
| Tap1l       | -2.274722  | 6.51275218 | 1.63E-05   | 0.02951325 | 5.3250496   | 4.96754837  | 7.20517562 | 7.4099126  | 7.6560747   |
| Dctn5       | -2.278209  | 6.0669222  | 1.01E-05   | 0.02610072 | 4.59838702  | 4.80161233  | 6.95420407 | 7.19951666 | 6.77974103  |
| Sfpq        | -2.3213119 | 6.35443105 | 0.00016596 | 0.05499784 | 5.0835424   | 4.83974539  | 6.64929549 | 7.52208373 | 7.67748822  |
| Zfp953      | -2.3759407 | 5.11328392 | 0.00010452 | 0.05258791 | 3.25787714  | 4.11756189  | 5.75616    | 6.062059   | 6.37276156  |
| Trappa4     | -2.3902657 | 6.10735049 | 0.00014925 | 0.0542161  | 4.63853546  | 4.70784666  | 6.40218452 | 7.46203494 | 7.32615085  |
| Ssr2        | -2.406668  | 7.70208826 | 9.06E-05   | 0.05258791 | 6.66893737  | 5.84722315  | 8.330386   | 8.97221423 | 8.69168057  |
| Scd1        | -2.4195298 | 5.51473622 | 1.23E-05   | 0.02837912 | 3.87872556  | 4.24731115  | 6.253429   | 6.4633026  | 6.73091327  |
| Fam26f      | -2.4306921 | 6.26526306 | 9.83E-05   | 0.05258791 | 4.76724663  | 4.84644899  | 6.64304283 | 7.690901   | 7.37867585  |
| Gm20262     | -2.4388861 | 6.0380008  | 0.00021267 | 0.05804847 | 5.13742286  | 4.01191545  | 6.81326901 | 7.36567993 | 6.86171674  |
| Snord69     | -2.4588832 | 6.75319579 | 6.79E-05   | 0.05258791 | 5.71929173  | 4.83643996  | 7.74610887 | 7.48827725 | 7.97586112  |
| SmeK2       | -2.5042263 | 5.70250035 | 4.38E-05   | 0.04824068 | 4.51919214  | 3.88073703  | 6.34668743 | 7.0270072  | 6.73887794  |
| Copb1       | -2.5202435 | 5.7155598  | 7.48E-06   | 0.02164523 | 4.35710309  | 4.0491167   | 6.65465    |            |             |

**Table S8. Comparison of in vivo- and in vitro-generated effector T cells**

**Genes upregulated in both in vivo and in vitro effector T cells**

| Entrez.Gene | Probe.Set.ID | Symbol  | Name                                              | logFC.Wherry | adj.P.Val.Wherry | SYMBOL  | logFC.Stromnes | Entrez.Gene |
|-------------|--------------|---------|---------------------------------------------------|--------------|------------------|---------|----------------|-------------|
| 110454      | 93078_at     | Ly6a    | lymphocyte antigen 6 complex, locus A             | 2.034646935  | 0.000139683      | Ly6a    | 1.456919252    | 110454      |
| 11799       | 101521_at    | Birc5   | baculoviral IAP repeat-containing 5               | 1.066415572  | 0.020747044      | Birc5   | 2.165379004    | 11799       |
| 12306       | 100569_at    | Anxa2   | annexin A2                                        | 2.841932749  | 0.001011005      | Anxa2   | 1.450060982    | 12306       |
| 12367       | 98437_at     | Casp3   | caspase 3                                         | 0.492927546  | 0.362899496      | Casp3   | 2.019144219    | 12367       |
| 12367       | 98436_s_at   | Casp3   | caspase 3                                         | 1.047546941  | 0.021624534      | Casp3   | 2.019144219    | 12367       |
| 12442       | 94294_at     | Ccnb2   | cyclin B2                                         | 1.361496681  | 0.038622117      | Ccnb2   | 3.950156458    | 12442       |
| 12477       | 97718_at     | Ctla4   | cytotoxic T-lymphocyte-associated protein 4       | 1.258137298  | 0.010956421      | Ctla4   | 1.898445272    | 12477       |
| 12534       | 100128_at    | Cdk1    | cyclin-dependent kinase 1                         | 1.205602776  | 0.014152511      | Cdk1    | 3.03459354     | 12534       |
| 13024       | 162421_r_at  | Ctla2a  | cytotoxic T lymphocyte-associated protein 2 alpha | 0.26857873   | NA               | Ctla2a  | 1.639075903    | 13024       |
| 13024       | 96912_s_at   | NA      | NA                                                | 3.711808677  | 7.94E-07         | Ctla2a  | 1.639075903    | 13024       |
| 13025       | 103518_at    | Ctla2b  | cytotoxic T lymphocyte-associated protein 2 beta  | 3.702218282  | 0.000144775      | Ctla2b  | 2.087852811    | 13025       |
| 13476       | 96115_at     | Reep5   | receptor accessory protein 5                      | 1.043012039  | 0.027342577      | Reep5   | 1.248668304    | 13476       |
| 13476       | 103886_at    | Reep5   | receptor accessory protein 5                      | 0.943865081  | 0.130121714      | Reep5   | 1.248668304    | 13476       |
| 14062       | 92267_at     | F2r     | coagulation factor II (thrombin) receptor         | 0.244693372  | 0.831822927      | F2r     | 1.365416294    | 14062       |
| 14062       | 95474_at     | F2r     | coagulation factor II (thrombin) receptor         | 1.436584106  | 0.018769027      | F2r     | 1.365416294    | 14062       |
| 14062       | 95313_at     | F2r     | coagulation factor II (thrombin) receptor         | 0.707585106  | 0.16271395       | F2r     | 1.365416294    | 14062       |
| 14190       | 97949_at     | Fgl2    | fibrinogen-like protein 2                         | 1.60636239   | 0.009465561      | Fgl2    | 1.309376898    | 14190       |
| 14190       | 162289_at    | Fgl2    | fibrinogen-like protein 2                         | -0.07450237  | NA               | Fgl2    | 1.309376898    | 14190       |
| 14727       | 92217_s_at   | NA      | NA                                                | 1.39753973   | 0.001359851      | Lilrb4  | 2.697899071    | 14727       |
| 14727       | 100325_at    | Gp49a   | glycoprotein 49 A                                 | 2.201149039  | 0.0020597        | Lilrb4  | 2.697899071    | 14727       |
| 14938       | 102995_s_at  | Gzma    | granzyme A                                        | 4.309657667  | 7.94E-07         | Gzma    | 3.347482238    | 14938       |
| 14939       | 102877_at    | Gzmb    | granzyme B                                        | 4.732739608  | 7.94E-07         | Gzmb    | 5.528603376    | 14939       |
| 15902       | 93013_at     | Id2     | inhibitor of DNA binding 2                        | 2.431238117  | 8.19E-05         | Id2     | 1.794394262    | 15902       |
| 16765       | 97910_at     | Stmn1   | stathmin 1                                        | -0.052387224 | NA               | Stmn1   | 2.601190194    | 16765       |
| 16765       | 97909_at     | Stmn1   | stathmin 1                                        | 2.033113774  | 0.02296873       | Stmn1   | 2.601190194    | 16765       |
| 16852       | 99669_at     | Lgalst  | lectin, galactose binding, soluble 1              | 3.977155503  | 4.96E-06         | Lgalst  | 2.44824482     | 16852       |
| 20135       | 102001_at    | Rrm2    | ribonucleotide reductase M2                       | 2.164079127  | 0.026201924      | Rrm2    | 3.436756226    | 20135       |
| 20198       | 99051_at     | S100a4  | S100 calcium binding protein A4                   | 3.611848499  | 1.46E-05         | S100a4  | 1.678642673    | 20198       |
| 20200       | 92770_at     | S100a6  | S100 calcium binding protein A6 (calycylin)       | 5.246299371  | 7.94E-07         | S100a6  | 1.7789774      | 20200       |
| 217430      | 99366_at     | Pulc3   | PQ loop repeat containing                         | 2.257208282  | 0.005191081      | Pulc3   | 1.514072765    | 217430      |
| 21973       | 99578_at     | Top2a   | topoisomerase (DNA) II alpha                      | 1.956504980  | 0.021260651      | Top2a   | 4.25443363     | 21973       |
| 26934       | 94953_at     | Racgap1 | Rac GTPase-activating protein 1                   | 1.04130677   | 0.020747044      | Racgap1 | 1.536928546    | 26934       |
| 56449       | 95755_at     | Ybx3    | Y box protein 3                                   | 1.210249755  | 0.006900525      | Ybx3    | 2.508800017    | 56449       |
| 97165       | 93250_r_at   | Hmgb2   | high mobility group box 2                         | 1.683259017  | 0.014414477      | Hmgb2   | 2.443823667    | 97165       |

**Genes downregulated in both in vivo and in vitro effector T cells**

| Entrez.Gene | Probe.Set.ID | GeneSymbol | Name                                           | logFC.Wherry | adj.P.Val.Wherry | transcript_cluster_id | adj.P.Val.Stromnes | Entrez.Gene |
|-------------|--------------|------------|------------------------------------------------|--------------|------------------|-----------------------|--------------------|-------------|
| 14357       | 102924_at    | Dtx1       | deltex 1 homolog (Drosophila)                  | -1.019202631 | 0.047991238      | Dtx1                  | -1.327267732       | 14357       |
| 15002       | 104429_at    | H2-Ob      | histocompatibility 2, O region beta locus      | -1.416516768 | 0.00468241       | H2-Ob                 | -1.365954966       | 15002       |
| 16194       | 104268_at    | Il6ra      | interleukin 6 receptor, alpha                  | -1.975896333 | 0.000796944      | Il6ra                 | -2.26449827        | 16194       |
| 16195       | 98349_at     | Il6st      | interleukin 6 signal transducer                | -0.377739976 | 0.492967334      | Il6st                 | -1.000617446       | 16195       |
| 16195       | 94345_at     | Il6st      | interleukin 6 signal transducer                | -2.729806116 | 0.005129336      | Il6st                 | -1.000617446       | 16195       |
| 16197       | 99030_at     | Il7r       | interleukin 7 receptor                         | -2.325911276 | 0.000523617      | Il7r                  | -1.199540918       | 16197       |
| 20440       | 94431_at     | St6galh    | beta galactoside alpha 2,6 sialyltransferase 1 | -0.116526474 | 0.933412549      | St6galh               | -1.050600839       | 20440       |
| 20440       | 94432_at     | St6galh    | beta galactoside alpha 2,6 sialyltransferase 1 | -3.367076815 | 3.43E-06         | St6galh               | -1.050600839       | 20440       |

**Genes upregulated and unique to in vitro-generated engineered T cells**

| Entrez.Gene | Probe.Set.ID | Symbol | Name                                               | logFC.Wherry | adj.P.Val.Wherry | SYMBOL | logFC.Stromnes | Entrez.Gene |
|-------------|--------------|--------|----------------------------------------------------|--------------|------------------|--------|----------------|-------------|
| 100037258   | 102415_r_at  | Dnajc3 | Dnaj (Hsp40) homolog, subfamily C, member 3        | -0.237516436 | NA               | Dnajc3 | 1.568877419    | 100037258   |
| 100037258   | 161868_r_at  | Dnajc3 | Dnaj (Hsp40) homolog, subfamily C, member 3        | 0.129566071  | NA               | Dnajc3 | 1.568877419    | 100037258   |
| 100037258   | 94343_at     | Dnajc3 | Dnaj (Hsp40) homolog, subfamily C, member 3        | -0.406825571 | 0.680330325      | Dnajc3 | 1.568877419    | 100037258   |
| 100037258   | 102414_i_at  | Dnajc3 | Dnaj (Hsp40) homolog, subfamily C, member 3        | -0.525823809 | 0.512094141      | Dnajc3 | 1.568877419    | 100037258   |
| 100604      | 104523_at    | Lrrc8c | leucine rich repeat containing 8 family, member C  | 0.202336145  | 0.842460519      | Lrrc8c | 1.447968146    | 100604      |
| 102545      | 98492_at     | Cntm7  | CKLF-like MARVEL transmembrane domain containing 7 | 0.224027091  | 0.803955525      | Cntm7  | 1.660179951    | 102545      |
| 103136      | 103413_at    | Pwp1   | PWP1 homolog (S. cerevisiae)                       | -0.324895041 | 0.555764277      | Pwp1   | 1.385442346    | 103136      |
| 103573      | 94228_at     | Xpo1   | exportin 1, CRM1 homolog (yeast)                   | -0.338069046 | 0.819416553      | Xpo1   | 1.471602195    | 103573      |
| 103573      | 94131_at     | Xpo1   | exportin 1, CRM1 homolog (yeast)                   | -0.144940723 | NA               | Xpo1   | 1.471602195    | 103573      |
| 103733      | 99924_at     | Tubg1  | tubulin, gamma 1                                   | 0.151149365  | NA               | Tubg1  | 1.548369953    | 103733      |
| 103963      | 94237_at     | Rpn1   | ribophorin I                                       | 0.204767271  | 0.844536943      | Rpn1   | 1.379914153    | 103963      |
| 103963      | 161400_f_at  | Rpn1   | ribophorin I                                       | -0.01631971  | 0.993393788      | Rpn1   | 1.379914153    | 103963      |
| 104444      | 94094_at     | Rexo2  | REX2, RNA exonuclease 2 homolog (S. cerevisiae)    | 0.211101686  | 0.941382         | Rexo2  | 1.416120702    | 104444      |
| 104458      | 96693_at     | Rars   | arginyl-tRNA synthetase                            | -0.304627216 | 0.876016094      | Rars   | 1.342041745    | 104458      |
| 104721      | 161386_f_at  | Ddx1   | DEAD (Asp-Glu-Ala-Asp) box polypeptide 1           | 0.173004962  | 0.886679297      | Ddx1   | 2.017571583    | 104721      |
| 104721      | 93257_at     | Ddx1   | DEAD (Asp-Glu-Ala-Asp) box polypeptide 1           | -0.036205925 | 0.986969008      | Ddx1   | 2.017571583    | 104721      |

|        |             |                                                  |                                                                          |                 |             |             |             |        |
|--------|-------------|--------------------------------------------------|--------------------------------------------------------------------------|-----------------|-------------|-------------|-------------|--------|
| 105440 | 100982_at   | Kctd9                                            | potassium channel tetramerisation domain containing 9                    | 0.232445807 NA  |             | Kctd9       | 1.202065897 | 105440 |
| 106344 | 103418_at   | Rfc4                                             | replication factor C (activator 1) 4                                     | 0.437881 NA     |             | Rfc4        | 2.307089605 | 106344 |
| 106795 | 102354_at   | Tcf19                                            | transcription factor 19                                                  | 0.615577656     | 0.214826499 | Tcf19       | 1.884797593 | 106795 |
| 106840 | 104434_at   | Unc119b                                          | unc-119 homolog B (C. elegans)                                           | 0.65834207      | 0.19677026  | Unc119b     | 1.050832064 | 106840 |
| 106957 | 103459_at   | Slc39a6                                          | solute carrier family 39 (metal ion transporter), member 6               | -0.039813466    | 0.986969008 | Slc39a6     | 1.503084046 | 106957 |
| 107045 | 103630_at   | Lars                                             | leucyl-tRNA synthetase                                                   | -0.334179272    | 0.67887747  | Lars        | 1.020707592 | 107045 |
| 107358 | 96276_r_at  | Tm9sf3                                           | transmembrane 9 superfamily member 3                                     | 0.137947641 NA  |             | Tm9sf3      | 1.550679216 | 107358 |
| 107358 | 162226_r_at | Tm9sf3                                           | transmembrane 9 superfamily member 3                                     | -0.08888664 NA  |             | Tm9sf3      | 1.550679216 | 107358 |
| 107358 | 96275_f_at  | Tm9sf3                                           | transmembrane 9 superfamily member 3                                     | 0.164939545     | 0.948320976 | Tm9sf3      | 1.550679216 | 107358 |
| 107508 | 96628_at    | Eprs                                             | glutamyl-prolyl-tRNA synthetase                                          | -0.104594048    | 0.537380522 | Eprs        | 1.898967074 | 107508 |
| 107513 | 97722_at    | Ssr1                                             | signal sequence receptor, alpha                                          | 0.366107704     | 0.580099387 | Ssr1        | 1.49615308  | 107513 |
| 107513 | 94511_at    | Ssr1                                             | signal sequence receptor, alpha                                          | -0.102533027    | 0.949779251 | Ssr1        | 1.49615308  | 107513 |
| 107939 | 96174_at    | Pom121                                           | nuclear pore membrane protein 121                                        | -0.347643338    | 0.612561656 | Pom121      | 1.059079171 | 107939 |
| 107995 | 96319_at    | Cdc20                                            | cell division cycle 20                                                   | 0.861015077     | 0.185856629 | Cdc20       | 3.294638848 | 107995 |
| 108014 | 96834_at    | Srsf9                                            | serine/arginine-rich splicing factor 9                                   | -0.276531452    | 0.850814513 | Srsf9       | 1.354815547 | 108014 |
| 108037 | 162458_i_at | Shmt2                                            | serine hydroxymethyltransferase 2 (mitochondrial)                        | 0.037842173 NA  |             | Shmt2       | 1.730700543 | 108037 |
| 108101 | 160815_at   | Fermt3                                           | fermitin family homolog 3 (Drosophila)                                   | -0.05975542     | 0.972911278 | Fermt3      | 1.034536691 | 108101 |
| 108671 | 160203_at   | Dnaj9                                            | DnaJ (Hsp40) homolog, subfamily C, member 9                              | -0.14141935 NA  |             | Dnaj9       | 1.605732369 | 108671 |
| 108907 | 102115_r_at | Nusap1                                           | nucleolar and spindle associated protein 1                               | 0.159765878     | 0.901544291 | Nusap1      | 3.65049305  | 108907 |
| 108907 | 161000_i_at | Nusap1                                           | nucleolar and spindle associated protein 1                               | 0.954317828     | 0.229979223 | Nusap1      | 3.65049305  | 108907 |
| 108961 | 103204_r_at | Ezf8                                             | E2F transcription factor 8                                               | 0.54769842      | 0.261729403 | Ezf8        | 2.11073824  | 108961 |
| 108961 | 103203_f_at | Ezf8                                             | E2F transcription factor 8                                               | 0.973320389     | 0.252827438 | Ezf8        | 2.11073824  | 108961 |
| 108989 | 95007_at    | Tpr                                              | translocated promoter region                                             | -0.183715243    |             | Tpr         | 1.11372256  | 108989 |
| 108989 | 104192_at   | Tpr                                              | translocated promoter region                                             | -0.07967157 NA  |             | Tpr         | 1.11372256  | 108989 |
| 109154 | 94000_at    | NA                                               | NA                                                                       | -0.107969157 NA |             | Mlec        | 1.239414654 | 109154 |
| 109212 | 94211_at    | Fam64a                                           | family with sequence similarity 64, member A                             | 0.166903624     | 0.891232036 | Fam64a      | 1.045460482 | 109212 |
| 109270 | 103511_at   | Prr5                                             | proline rich 5 (renal)                                                   | 0.144965969 NA  |             | Prr5        | 1.160405319 | 109270 |
| 110006 | 97538_at    | Gusb                                             | glucuronidase, beta                                                      | -0.42837285     | 0.719964222 | Gusb        | 1.011700397 | 110006 |
| 110033 | 95118_r_at  | Kif22                                            | kinesin family member 22                                                 | 0.344292588     | 0.541897575 | Kif22       | 2.555809014 | 110033 |
| 110052 | 160286_at   | Dek                                              | DEK oncogene (DNA binding)                                               | 0.367349575     | 0.594227329 | Dek         | 1.194034511 | 110052 |
| 110196 | 162217_r_at | Fdps                                             | farnesyl diphosphate synthetase                                          | 0.135912667 NA  |             | Fdps        | 1.559562827 | 110196 |
| 110196 | 160424_f_at | Fdps                                             | farnesyl diphosphate synthetase                                          | -0.06104893     | 0.964759131 | Fdps        | 1.559562827 | 110196 |
| 110196 | 162281_at   | Fdps                                             | farnesyl diphosphate synthetase                                          | 0.245318634     | 0.775097629 | Fdps        | 1.559562827 | 110196 |
| 110196 | 99098_at    | Fdps                                             | farnesyl diphosphate synthetase                                          | -0.168339343    | 0.92948193  | Fdps        | 1.559562827 | 110196 |
| 110611 | 96359_at    | Hdlbp                                            | high density lipoprotein (HDL) binding protein                           | -0.106270011    | 0.941382    | Hdlbp       | 1.532279272 | 110611 |
| 110749 | 100890_at   | Chafib                                           | chromatin assembly factor 1, subunit B (p60)                             | 0.21896202      | 0.845999571 | Chafib      | 1.809943896 | 110749 |
| 110750 | 104317_at   | Cse1l                                            | chromosome segregation 1-like (S. cerevisiae)                            | -0.444644042    | 0.720706828 | Cse1l       | 1.258458883 | 110750 |
| 110809 | 101022_at   | Srsf1                                            | serine/arginine-rich splicing factor 1                                   | 0.02982264 NA   |             | Srsf1       | 1.623018429 | 110809 |
| 110809 | 104586_at   | Srsf1                                            | serine/arginine-rich splicing factor 1                                   | -0.143230891    | 0.965482692 | Srsf1       | 1.623018429 | 110809 |
| 110809 | 160141_r_at | Srsf1                                            | serine/arginine-rich splicing factor 1                                   | 0.018414856 NA  |             | Srsf1       | 1.623018429 | 110809 |
| 110809 | 160539_at   | Srsf1                                            | serine/arginine-rich splicing factor 1                                   | 0.148965441 NA  |             | Srsf1       | 1.623018429 | 110809 |
| 110842 | 96112_at    | EtfA                                             | electron transferring flavoprotein, alpha polypeptide                    | -0.199817322    | 0.951684169 | EtfA        | 1.406000507 | 110842 |
| 110956 | 162344_at   | D17H6S56E-; DNA segment, Chr 17, human D6S56 E 5 |                                                                          | 0.163405933 NA  |             | D17H6S56E-5 | 1.192856006 | 110956 |
| 110956 | 104333_at   | D17H6S56E-; DNA segment, Chr 17, human D6S56 E 5 |                                                                          | -0.034513862 NA |             | D17H6S56E-5 | 1.192856006 | 110956 |
| 112405 | 95468_at    | Egln1                                            | EGL nine homolog 1 (C. elegans)                                          | -0.188590511    | 0.881662925 | Egln1       | 1.511018202 | 112405 |
| 11431  | 104160_at   | NA                                               | NA                                                                       | 0.093160561 NA  |             | Acp1        | 1.859006584 | 11431  |
| 11431  | 96053_i_at  | NA                                               | NA                                                                       | 0.179089148 NA  | 0.869098389 | Acp1        | 1.859006584 | 11431  |
| 11431  | 93219_at    | NA                                               | NA                                                                       | -0.229147156 NA | 0.788808158 | Acp1        | 1.859006584 | 11431  |
| 11431  | 96052_at    | NA                                               | NA                                                                       | 0.060658263 NA  | 0.965125422 | Acp1        | 1.859006584 | 11431  |
| 11431  | 161659_f_at | NA                                               | NA                                                                       | 0.022264841 NA  |             | Acp1        | 1.859006584 | 11431  |
| 11431  | 96054_f_at  | NA                                               | NA                                                                       | 0.117824593 NA  |             | Acp1        | 1.859006584 | 11431  |
| 114663 | 98420_at    | Impa2                                            | inositol (myo)-(or 4)-monophosphatase 2                                  | 0.068936402 NA  |             | Impa2       | 2.29844919  | 114663 |
| 11501  | 103024_at   | Adam8                                            | a disintegrin and metallopeptidase domain 8                              | 0.453331141     | 0.352880855 | Adam8       | 1.229020179 | 11501  |
| 11566  | 99038_at    | Adss                                             | adenylosuccinate synthetase, non muscle                                  | 0.047122557     | 0.978790518 | Adss        | 1.773031222 | 11566  |
| 11566  | 99039_g_at  | Adss                                             | adenylosuccinate synthetase, non muscle                                  | 0.109949025     | 0.966606198 | Adss        | 1.773031222 | 11566  |
| 11637  | 95148_at    | Ak2                                              | adenylate kinase 2                                                       | 0.175958673     | 0.909614406 | Ak2         | 1.146480804 | 11637  |
| 117198 | 97302_at    | Ivns1abp                                         | influenza virus NS1A binding protein                                     | -1.119284274    | 0.403328783 | Ivns1abp    | 1.742329237 | 117198 |
| 11740  | 100617_at   | Slc25a5                                          | solute carrier family 25 (mitochondrial carrier, adenine nucleoside)     | 0.045202114     | 0.973050659 | Slc25a5     | 1.337437821 | 11740  |
| 11740  | 100618_f_at | Slc25a5                                          | solute carrier family 25 (mitochondrial carrier, adenine nucleoside)     | 0.235774998     | 0.842472769 | Slc25a5     | 1.337437821 | 11740  |
| 11740  | 100619_r_at | Slc25a5                                          | solute carrier family 25 (mitochondrial carrier, adenine nucleoside)     | 0.182253201     | 0.866637141 | Slc25a5     | 1.337437821 | 11740  |
| 11747  | 93083_at    | Anxa5                                            | annexin A5                                                               | 0.108282405     | 0.950433011 | Anxa5       | 1.27474613  | 11747  |
| 11765  | 103242_at   | Ap1g1                                            | adaptor protein complex AP-1, gamma 1 subunit                            | -0.173020774    | 0.921673836 | Ap1g1       | 1.106553523 | 11765  |
| 11765  | 161593_r_at | Ap1g1                                            | adaptor protein complex AP-1, gamma 1 subunit                            | 0.149768543 NA  |             | Ap1g1       | 1.106553523 | 11765  |
| 11765  | 92288_at    | Ap1g1                                            | adaptor protein complex AP-1, gamma 1 subunit                            | -0.016526959 NA |             | Ap1g1       | 1.106553523 | 11765  |
| 11772  | 100492_at   | Ap2a2                                            | adaptor-related protein complex 2, alpha 2 subunit                       | 0.066455283 NA  |             | Ap2a2       | 1.144563701 | 11772  |
| 11772  | 102835_at   | Ap2a2                                            | adaptor-related protein complex 2, alpha 2 subunit                       | 0.15691137      | 0.908363662 | Ap2a2       | 1.144563701 | 11772  |
| 11938  | 99579_s_at  | Atp2a2                                           | ATPase, Ca++ transporting, cardiac muscle, slow twitch 2                 | -0.170002479 NA |             | Atp2a2      | 1.17930015  | 11938  |
| 11946  | 100753_at   | Atp5a1                                           | ATP synthase, H+ transporting, mitochondrial F1 complex, alpha subunit   | -0.456687007    | 0.759334942 | Atp5a1      | 1.103095422 | 11946  |
| 11950  | 96898_at    | Atp5f1                                           | ATP synthase, H+ transporting, mitochondrial Fo complex, sigma 3 subunit | 0.134741953 NA  |             | Atp5f1      | 1.040650454 | 11950  |

|       |             |         |                                                            |              |             |         |             |       |
|-------|-------------|---------|------------------------------------------------------------|--------------|-------------|---------|-------------|-------|
| 11991 | 94303_at    | Hnrmpd  | heterogeneous nuclear ribonucleoprotein D                  | 0.297781849  | 0.783241765 | Hnrmpd  | 1.247655778 | 11991 |
| 12017 | 160540_at   | Bag1    | BCL2-associated athanogene 1                               | 0.525621568  | 0.322165225 | Bag1    | 1.047863405 | 12017 |
| 12043 | 98870_at    | Bcl2    | B cell leukemia/lymphoma 2                                 | -0.224785378 | 0.822790247 | Bcl2    | 1.749843723 | 12043 |
| 12043 | 98869_g_at  | Bcl2    | B cell leukemia/lymphoma 2                                 | -1.025138331 | 0.018769027 | Bcl2    | 1.749843723 | 12043 |
| 12043 | 98868_at    | Bcl2    | B cell leukemia/lymphoma 2                                 | -2.27871778  | 0.000513338 | Bcl2    | 1.749843723 | 12043 |
| 12125 | 100988_at   | Bcl2l11 | BCL2-like 11 (apoptosis facilitator)                       | 0.096725286  | 0.950433011 | Bcl2l11 | 1.090755007 | 12125 |
| 12125 | 99418_at    | Bcl2l11 | BCL2-like 11 (apoptosis facilitator)                       | 0.082961279  | 0.951911208 | Bcl2l11 | 1.090755007 | 12125 |
| 12125 | 99419_g_at  | Bcl2l11 | BCL2-like 11 (apoptosis facilitator)                       | 0.228911208  | NA          | Bcl2l11 | 1.090755007 | 12125 |
| 12144 | 102631_at   | Blm     | Bloom syndrome, RecQ helicase-like                         | 0.095668166  | NA          | Blm     | 2.532907187 | 12144 |
| 12181 | 161599_i_at | Bop1    | block of proliferation 1                                   | 0.269334348  | 0.842427269 | Bop1    | 1.030560023 | 12181 |
| 12181 | 160878_at   | Bop1    | block of proliferation 1                                   | -0.333315599 | 0.525242121 | Bop1    | 1.030560023 | 12181 |
| 12189 | 102976_at   | Brcat1  | breast cancer 1                                            | 0.622867436  | 0.321487874 | Brcat1  | 1.49704737  | 12189 |
| 12190 | 102911_at   | Brcat2  | breast cancer 2                                            | 0.088979851  | NA          | Brcat2  | 1.067055439 | 12190 |
| 12215 | 101078_at   | Bsg     | basigin                                                    | 0.719415321  | 0.257862521 | Bsg     | 1.038128631 | 12215 |
| 12235 | 162264_s_at | Bub1    | budding uninhibited by benzimidazoles 1 homolog (S. cerevi | 0.122892162  | NA          | Bub1    | 2.299014742 | 12235 |
| 12235 | 104097_at   | Bub1    | budding uninhibited by benzimidazoles 1 homolog (S. cerevi | 1.068347864  | NA          | Bub1    | 2.299014742 | 12235 |
| 12235 | 97095_at    | Bub1    | budding uninhibited by benzimidazoles 1 homolog (S. cerevi | 0.349184585  | NA          | Bub1    | 2.299014742 | 12235 |
| 12237 | 101961_at   | Bub3    | budding uninhibited by benzimidazoles 3 homolog (S. cerevi | 0.062187874  | 0.973497364 | Bub3    | 1.006759475 | 12237 |
| 12261 | 96856_at    | C1qbp   | complement component 1, q subcomponent binding protein     | -0.229602513 | 0.796249536 | C1qbp   | 1.094148133 | 12261 |
| 12261 | 96857_at    | C1qbp   | complement component 1, q subcomponent binding protein     | -0.036036139 | 0.979859538 | C1qbp   | 1.094148133 | 12261 |
| 12315 | 92632_at    | NA      | NA                                                         | 0.567907714  | 0.478034389 | Calm3   | 1.127563997 | 12315 |
| 12315 | 92631_f_at  | NA      | NA                                                         | -0.13296742  | 0.924416438 | Calm3   | 1.127563997 | 12315 |
| 12330 | 160180_at   | Canx    | calnexin                                                   | -0.19421555  | 0.876016094 | Canx    | 1.528190198 | 12330 |
| 12330 | 94886_at    | Canx    | calnexin                                                   | 0.087426956  | NA          | Canx    | 1.528190198 | 12330 |
| 12340 | 93499_at    | Capz2   | capping protein (actin filament) muscle Z-line, alpha 1    | 0.177367604  | 0.940766699 | Capz2   | 1.035125233 | 12340 |
| 12402 | 100291_at   | Cbl     | Casitas B-lineage lymphoma                                 | -0.002129341 | NA          | Cbl     | 1.092284343 | 12402 |
| 12412 | 160797_r_at | Cbx1    | chromobox 1                                                | -0.001489591 | NA          | Cbx1    | 1.275627951 | 12412 |
| 12412 | 96775_at    | Cbx1    | chromobox 1                                                | 0.018822665  | NA          | Cbx1    | 1.275627951 | 12412 |
| 12419 | 95614_at    | Cbx5    | chromobox 5                                                | 0.095648579  | 0.94985528  | Cbx5    | 1.415784621 | 12419 |
| 12419 | 104259_at   | Cbx5    | chromobox 5                                                | 0.232185594  | NA          | Cbx5    | 1.415784621 | 12419 |
| 12428 | 99186_at    | Cena2   | cyclin A2                                                  | 0.520260103  | 0.301597447 | Cena2   | 3.398899857 | 12428 |
| 12447 | 103034_at   | Cene1   | cyclin E1                                                  | 0.247390665  | NA          | Cene1   | 2.308837433 | 12447 |
| 12448 | 97182_at    | Cene2   | cyclin E2                                                  | 0.016329167  | NA          | Cene2   | 2.921368764 | 12448 |
| 12450 | 160127_at   | Ceng1   | cyclin G1                                                  | -0.035311988 | 0.987035615 | Ceng1   | 1.879662247 | 12450 |
| 12460 | 162052_i_at | Ccs     | copper chaperone for superoxide dismutase                  | -0.144047814 | NA          | Ccs     | 1.019121827 | 12460 |
| 12460 | 103909_at   | Ccs     | copper chaperone for superoxide dismutase                  | -0.055629035 | NA          | Ccs     | 1.019121827 | 12460 |
| 12460 | 162382_f_at | Ccs     | copper chaperone for superoxide dismutase                  | 0.036920752  | NA          | Ccs     | 1.019121827 | 12460 |
| 12460 | 161506_r_at | Ccs     | copper chaperone for superoxide dismutase                  | 0.247057474  | 0.774715551 | Ccs     | 1.019121827 | 12460 |
| 12460 | 162351_f_at | Ccs     | copper chaperone for superoxide dismutase                  | -0.09980586  | NA          | Ccs     | 1.019121827 | 12460 |
| 12461 | 160442_at   | Cct2    | chaperonin containing Tcp1, subunit 2 (beta)               | -0.087534639 | NA          | Cct2    | 1.276093579 | 12461 |
| 12462 | 98153_at    | Cct3    | chaperonin containing Tcp1, subunit 3 (gamma)              | -1.037498544 | 0.228047291 | Cct3    | 1.111652785 | 12462 |
| 12462 | 98446_s_at  | NA      | NA                                                         | -0.838029931 | 0.24547444  | Cct3    | 1.111652785 | 12462 |
| 12462 | 161238_f_at | Cct3    | chaperonin containing Tcp1, subunit 3 (gamma)              | -0.047760963 | NA          | Cct3    | 1.111652785 | 12462 |
| 12465 | 93295_at    | Cct5    | chaperonin containing Tcp1, subunit 5 (epsilon)            | -0.49895931  | 0.650618992 | Cct5    | 1.022351537 | 12465 |
| 12465 | 161514_at   | Cct5    | chaperonin containing Tcp1, subunit 5 (epsilon)            | -0.235679634 | 0.823950285 | Cct5    | 1.022351537 | 12465 |
| 12469 | 160102_at   | Cct8    | chaperonin containing Tcp1, subunit 8 (theta)              | -0.446950675 | 0.746938122 | Cct8    | 1.198880465 | 12469 |
| 12530 | 97390_at    | Cdc25a  | cell division cycle 25A                                    | 0.052862815  | NA          | Cdc25a  | 1.958121113 | 12530 |
| 12530 | 97389_at    | Cdc25a  | cell division cycle 25A                                    | -0.08435653  | 0.950433011 | Cdc25a  | 1.958121113 | 12530 |
| 12532 | 102934_s_at | Cdc25c  | cell division cycle 25C                                    | 0.648948174  | 0.214792628 | Cdc25c  | 1.235456075 | 12532 |
| 12532 | 102935_at   | Cdc25c  | cell division cycle 25C                                    | 0.351843627  | 0.531915171 | Cdc25c  | 1.235456075 | 12532 |
| 12544 | 102403_at   | Cde45   | cell division cycle 45                                     | 0.394702526  | 0.57078786  | Cde45   | 2.887004404 | 12544 |
| 12566 | 94412_at    | Cdk2    | cyclin-dependent kinase 2                                  | 0.382400046  | 0.548701575 | Cdk2    | 1.358766467 | 12566 |
| 12566 | 94411_at    | Cdk2    | cyclin-dependent kinase 2                                  | -0.00513376  | NA          | Cdk2    | 1.358766467 | 12566 |
| 12567 | 160538_at   | NA      | NA                                                         | -0.036179449 | NA          | Cdk4    | 1.562055842 | 12567 |
| 12567 | 101017_at   | NA      | NA                                                         | 0.056388804  | NA          | Cdk4    | 1.562055842 | 12567 |
| 12575 | 94881_at    | Cdkn1a  | cyclin-dependent kinase inhibitor 1A (P21)                 | 0.17881074   | NA          | Cdkn1a  | 3.048599275 | 12575 |
| 12575 | 98067_at    | Cdkn1a  | cyclin-dependent kinase inhibitor 1A (P21)                 | 0.232991406  | 0.799778045 | Cdkn1a  | 3.048599275 | 12575 |
| 12615 | 100616_at   | Cenpa   | centromere protein A                                       | 0.526553801  | 0.73416326  | Cenpa   | 1.41396717  | 12615 |
| 12649 | 103064_at   | Chek1   | checkpoint kinase 1                                        | 0.875427368  | 0.091425671 | Chek1   | 2.131571055 | 12649 |
| 12700 | 100022_at   | Cish    | cytokine inducible SH2-containing protein                  | 0.131089323  | NA          | Cish    | 2.00329235  | 12700 |
| 12704 | 93687_r_at  | Cit     | citron                                                     | 0.321999221  | 0.739326797 | Cit     | 1.10133496  | 12704 |
| 12704 | 93686_s_at  | Cit     | citron                                                     | 0.147579848  | NA          | Cit     | 1.10133496  | 12704 |
| 12773 | 94696_at    | Ccr4    | chemokine (C-C motif) receptor 4                           | 0.055205673  | NA          | Ccr4    | 1.915012866 | 12773 |
| 12858 | 160438_at   | Cox5a   | cytochrome c oxidase subunit Va                            | 0.16243476   | 0.90471119  | Cox5a   | 1.529109361 | 12858 |
| 12858 | 161490_at   | Cox5a   | cytochrome c oxidase subunit Va                            | 0.153880515  | NA          | Cox5a   | 1.529109361 | 12858 |
| 12859 | 93110_at    | NA      | NA                                                         | 0.56990738   | 0.444969604 | Cox5b   | 1.138650127 | 12859 |
| 12866 | 93820_at    | Cox7a2  | cytochrome c oxidase subunit VIIa 2                        | 0.379289648  | 0.599430938 | Cox7a2  | 1.053907985 | 12866 |
| 12868 | 92860_at    | NA      | NA                                                         | -0.2130885   | NA          | Cox8a   | 1.260404077 | 12868 |
| 12894 | 93320_at    | Cpt1a   | carnitine palmitoyltransferase 1a, liver                   | 0.35816104   | 0.654472568 | Cpt1a   | 1.204086365 | 12894 |

|       |             |          |                                                            |              |             |          |             |       |
|-------|-------------|----------|------------------------------------------------------------|--------------|-------------|----------|-------------|-------|
| 12925 | 94061_at    | Crip1    | cysteine-rich protein 1 (intestinal)                       | 1.758646288  | 0.065539432 | Crip1    | 1.140017805 | 12925 |
| 12934 | 98298_at    | Dpysl2   | dihydropyrimidinase-like 2                                 | 0.018829505  | NA          | Dpysl2   | 1.80557627  | 12934 |
| 12974 | 99666_at    | Cs       | citrate synthase                                           | 0.103059156  | 0.950433011 | Cs       | 1.25363411  | 12974 |
| 13000 | 94483_at    | Csnk2a2  | casein kinase 2, alpha prime polypeptide                   | -0.015521423 | 0.993475044 | Csnk2a2  | 1.574377056 | 13000 |
| 13000 | 98245_at    | NA       | NA                                                         | -0.053519909 | NA          | Csnk2a2  | 1.574377056 | 13000 |
| 13000 | 94482_at    | Csnk2a2  | casein kinase 2, alpha prime polypeptide                   | 0.10054266   | NA          | Csnk2a2  | 1.574377056 | 13000 |
| 13006 | 102853_at   | Smc3     | structural maintenance of chromosomes 3                    | -0.102740871 | NA          | Smc3     | 1.58394493  | 13006 |
| 13018 | 100148_at   | Ctcf     | CCCTC-binding factor                                       | -0.168971361 | 0.933412549 | Ctcf     | 1.001382223 | 13018 |
| 13121 | 94916_at    | Cyp51    | cytochrome P450, family 51                                 | 0.07290756   | 0.958487806 | Cyp51    | 1.898193503 | 13121 |
| 13167 | 97248_at    | Dbi      | diazepam binding inhibitor                                 | 0.630681844  | 0.132636582 | Dbi      | 1.063999429 | 13167 |
| 13196 | 161139_f_at | Asap1    | ArfGAP with SH3 domain, ankyrin repeat and PH domain1      | 0.100611446  | NA          | Asap1    | 1.090829939 | 13196 |
| 13196 | 100513_at   | Asap1    | ArfGAP with SH3 domain, ankyrin repeat and PH domain1      | 0.266250208  | 0.720615765 | Asap1    | 1.090829939 | 13196 |
| 13204 | 160572_at   | Dhx15    | DEAH (Asp-Glu-Ala-His) box polypeptide 15                  | 0.079232236  | NA          | Dhx15    | 1.146759588 | 13204 |
| 13209 | 93964_s_at  | Ddx6     | DEAD (Asp-Glu-Ala-Asp) box polypeptide 6                   | -0.531679375 | 0.447138728 | Ddx6     | 1.19810301  | 13209 |
| 13209 | 96731_at    | Ddx6     | DEAD (Asp-Glu-Ala-Asp) box polypeptide 6                   | -0.229967301 | 0.908037691 | Ddx6     | 1.19810301  | 13209 |
| 13209 | 93965_r_at  | Ddx6     | DEAD (Asp-Glu-Ala-Asp) box polypeptide 6                   | -0.627122452 | 0.342106894 | Ddx6     | 1.19810301  | 13209 |
| 13211 | 103598_at   | Dhx9     | DEAH (Asp-Glu-Ala-His) box polypeptide 9                   | -0.024372615 | 0.984096154 | Dhx9     | 1.285534158 | 13211 |
| 13361 | 104547_at   | Dhfr     | dihydrofolate reductase                                    | 0.235993532  | NA          | Dhfr     | 2.258112428 | 13361 |
| 13433 | 161601_i_at | Dnm1t    | DNA methyltransferase (cytosine-5) 1                       | 0.089149834  | NA          | Dnm1t    | 2.067468446 | 13433 |
| 13433 | 101445_at   | Dnm1t    | DNA methyltransferase (cytosine-5) 1                       | 0.334693152  | 0.659831394 | Dnm1t    | 2.067468446 | 13433 |
| 13478 | 161420_r_at | Dpagt1   | dolichyl-phosphate (UDP-N-acetylglucosamine) acetylglucosa | -0.130029438 | NA          | Dpagt1   | 1.606739402 | 13478 |
| 13478 | 103352_at   | Dpagt1   | dolichyl-phosphate (UDP-N-acetylglucosamine) acetylglucosa | 0.198262378  | 0.919069158 | Dpagt1   | 1.606739402 | 13478 |
| 13557 | 93405_at    | E2f3     | E2F transcription factor 3                                 | -0.004705193 | NA          | E2f3     | 1.120280794 | 13557 |
| 13605 | 97411_at    | Ect2     | ect2 oncogene                                              | 1.171580099  | 0.16271395  | Ect2     | 2.480426695 | 13605 |
| 13669 | 94250_at    | Eif3a    | eukaryotic translation initiation factor 3, subunit A      | -0.050922195 | 0.972911278 | Eif3a    | 1.430787394 | 13669 |
| 13690 | 100535_at   | Eif4g2   | eukaryotic translation initiation factor 4, gamma 2        | -0.804948819 | 0.38587807  | Eif4g2   | 1.074995726 | 13690 |
| 13877 | 94040_at    | Erh      | enhancer of rudimentary homolog (Drosophila)               | 0.726093384  | 0.273152081 | Erh      | 1.13953689  | 13877 |
| 14004 | 96906_at    | NA       | NA                                                         | 0.096768625  | NA          | Chchd2   | 1.227664542 | 14004 |
| 14056 | 99917_at    | Ezh2     | enhancer of zeste homolog 2 (Drosophila)                   | 0.802045779  | 0.370090862 | Ezh2     | 2.410454496 | 14056 |
| 14104 | 98755_at    | Fasn     | fatty acid synthase                                        | -0.349000081 | 0.503639278 | Fasn     | 1.505185285 | 14104 |
| 14113 | 160503_at   | NA       | NA                                                         | -0.61728777  | 0.221400252 | Fbl      | 1.059584167 | 14113 |
| 14137 | 97518_at    | Fdft1    | farnesyl diphosphate farnesyl transferase 1                | 0.121179286  | NA          | Fdft1    | 1.405810581 | 14137 |
| 14194 | 99148_at    | Fh1      | fumarate hydratase 1                                       | -0.170547776 | 0.894733333 | Fh1      | 1.363944527 | 14194 |
| 14211 | 97421_at    | Smc2     | structural maintenance of chromosomes 2                    | 0.667833428  | 0.771669439 | Smc2     | 2.383032203 | 14211 |
| 14297 | 101407_at   | Fxn      | frataxin                                                   | 0.202996897  | 0.847556094 | Fxn      | 1.204354562 | 14297 |
| 14433 | 162176_r_at | NA       | NA                                                         | 0.057264644  | 0.967251179 | Gapdh    | 1.546355963 | 14433 |
| 14433 | 101214_f_at | NA       | NA                                                         | 0.911418536  | 0.09676985  | Gapdh    | 1.546355963 | 14433 |
| 14569 | 160114_at   | Gdi2     | guanosine diphosphate (GDP) dissociation inhibitor 2       | 0.072850008  | 0.972911278 | Gdi2     | 1.351013032 | 14569 |
| 14635 | 97820_at    | Galk1    | galactokinase 1                                            | -0.225401181 | NA          | Galk1    | 1.137162082 | 14635 |
| 14688 | 94854_g_at  | Gnb1     | guanine nucleotide binding protein (G protein), beta 1     | 0.409334412  | 0.563361502 | Gnb1     | 1.339791709 | 14688 |
| 14688 | 94853_at    | Gnb1     | guanine nucleotide binding protein (G protein), beta 1     | 0.497135143  | 0.316467684 | Gnb1     | 1.339791709 | 14688 |
| 14688 | 97458_at    | Gnb1     | guanine nucleotide binding protein (G protein), beta 1     | 0.023824589  | 0.985435386 | Gnb1     | 1.339791709 | 14688 |
| 14718 | 93489_at    | Got1     | glutamate oxaloacetate transaminase 1, soluble             | 0.074065594  | NA          | Got1     | 1.333967608 | 14718 |
| 14719 | 161995_r_at | Got2     | glutamate oxaloacetate transaminase 2, mitochondrial       | 0.062804411  | 0.967251179 | Got2     | 1.418816728 | 14719 |
| 14719 | 93355_at    | Got2     | glutamate oxaloacetate transaminase 2, mitochondrial       | 0.206406336  | 0.859532969 | Got2     | 1.418816728 | 14719 |
| 14751 | 100573_f_at | Gpi1     | glucose phosphate isomerase 1                              | 0.222724341  | 0.873017376 | Gpi1     | 1.264516078 | 14751 |
| 14751 | 161524_r_at | Gpi1     | glucose phosphate isomerase 1                              | 0.046096767  | NA          | Gpi1     | 1.264516078 | 14751 |
| 14751 | 100574_f_at | Gpi1     | glucose phosphate isomerase 1                              | 0.115962663  | 0.949899324 | Gpi1     | 1.264516078 | 14751 |
| 14793 | 94217_f_at  | Cdca3    | cell division cycle associated 3                           | 0.633376104  | 0.21706584  | Cdca3    | 1.057861616 | 14793 |
| 14827 | 101060_at   | Pdia3    | protein disulfide isomerase associated 3                   | 0.600389024  | 0.590669526 | Pdia3    | 1.527236883 | 14827 |
| 14841 | 99522_at    | Gsg2     | germ cell-specific gene 2                                  | 0.694061558  | NA          | Gsg2     | 2.555834015 | 14841 |
| 14852 | 93727_at    | Gspt1    | G1 to S phase transition 1                                 | -0.346082518 | 0.743163101 | Gspt1    | 1.204265175 | 14852 |
| 14940 | 161834_at   | Gzmc     | granzyme C                                                 | 0.050177353  | NA          | Gzmc     | 3.074034501 | 14940 |
| 14940 | 102733_at   | Gzmc     | granzyme C                                                 | 0.348257679  | 0.495628169 | Gzmc     | 3.074034501 | 14940 |
| 15161 | 100900_at   | Hcfct1   | host cell factor C1                                        | 0.297268205  | 0.649419619 | Hcfct1   | 1.347844215 | 15161 |
| 15161 | 100901_at   | Hcfct1   | host cell factor C1                                        | 0.075150773  | NA          | Hcfct1   | 1.347844215 | 15161 |
| 15163 | 99461_at    | Hcls1    | hematopoietic cell specific Lyn substrate 1                | 0.575341702  | 0.343082994 | Hcls1    | 1.000535007 | 15163 |
| 15182 | 160643_at   | Hdac2    | histone deacetylase 2                                      | -0.811900043 | 0.0674633   | Hdac2    | 1.580273902 | 15182 |
| 15201 | 93228_at    | Hells    | helicase, lymphoid specific                                | 0.293370021  | NA          | Hells    | 2.080912686 | 15201 |
| 15251 | 98629_f_at  | Hif1a    | hypoxia inducible factor 1, alpha subunit                  | -0.058798508 | 0.977217119 | Hif1a    | 1.735493613 | 15251 |
| 15251 | 98628_f_at  | Hif1a    | hypoxia inducible factor 1, alpha subunit                  | -0.195121064 | 0.933412549 | Hif1a    | 1.735493613 | 15251 |
| 15257 | 103262_at   | Hipk1    | homeodomain interacting protein kinase 1                   | 0.155797593  | NA          | Hipk1    | 1.19534705  | 15257 |
| 15270 | 93019_at    | H2afx    | H2A histone family, member X                               | 0.449056562  | 0.69618428  | H2afx    | 2.427629782 | 15270 |
| 15357 | 104285_at   | Hmgcr    | 3-hydroxy-3-methylglutaryl-Coenzyme A reductase            | -0.252979714 | 0.894687083 | Hmgcr    | 1.520513407 | 15357 |
| 15357 | 99425_at    | Hmgcr    | 3-hydroxy-3-methylglutaryl-Coenzyme A reductase            | -0.288271998 | NA          | Hmgcr    | 1.520513407 | 15357 |
| 15384 | 94896_at    | Hnrnpab  | heterogeneous nuclear ribonucleoprotein A/B                | -0.178087638 | 0.890457259 | Hnrnpab  | 1.848642356 | 15384 |
| 15510 | 161140_r_at | Hspd1    | heat shock protein 1 (chaperonin)                          | 0.174071455  | 0.907781441 | Hspd1    | 1.145661608 | 15510 |
| 15510 | 93277_at    | Hspd1    | heat shock protein 1 (chaperonin)                          | -0.502088241 | 0.344739799 | Hspd1    | 1.145661608 | 15510 |
| 15516 | 161761_r_at | Hsp90ab1 | heat shock protein 90 alpha (cytosolic), class B member 1  | 0.281773057  | 0.802738209 | Hsp90ab1 | 1.383934074 | 15516 |



|        |             |          |                                                                  |              |             |          |              |        |
|--------|-------------|----------|------------------------------------------------------------------|--------------|-------------|----------|--------------|--------|
| 15516  | 95359_at    | Hsp90ab1 | heat shock protein 90 alpha (cytosolic), class B member 1        | -0.443276883 | 0.416203521 | Hsp90ab1 | 1.383934074  | 15516  |
| 15519  | 95282_at    | Hsp90aa1 | heat shock protein 90, alpha (cytosolic), class A member 1       | -0.409418134 | 0.541071112 | Hsp90aa1 | 1.857612493  | 15519  |
| 15519  | 161869_i_at | Hsp90aa1 | heat shock protein 90, alpha (cytosolic), class A member 1       | 0.148269944  | NA          | Hsp90aa1 | 1.857612493  | 15519  |
| 15525  | 100353_g_at | Hspa4    | heat shock protein 4                                             | -0.00180503  | 0.999646575 | Hspa4    | 1.302005589  | 15525  |
| 15525  | 96594_at    | Hspa4    | heat shock protein 4                                             | -0.23560021  | NA          | Hspa4    | 1.302005589  | 15525  |
| 15525  | 100352_at   | Hspa4    | heat shock protein 4                                             | 0.021664214  | NA          | Hspa4    | 1.302005589  | 15525  |
| 15525  | 92571_at    | Hspa4    | heat shock protein 4                                             | -0.510023247 | 0.799778045 | Hspa4    | 1.302005589  | 15525  |
| 15525  | 161745_f_at | Hspa4    | heat shock protein 4                                             | -0.070448541 | NA          | Hspa4    | 1.302005589  | 15525  |
| 15526  | 97914_at    | Hspa9    | heat shock protein 9                                             | -1.677976059 | 0.036423451 | Hspa9    | 1.2903066812 | 15526  |
| 15925  | 162160_at   | Ide      | insulin degrading enzyme                                         | 0.232701251  | 0.782734072 | Ide      | 1.785111678  | 15925  |
| 15925  | 94380_at    | Ide      | insulin degrading enzyme                                         | 0.54560362   | 0.431781277 | Ide      | 1.785111678  | 15925  |
| 15925  | 160290_at   | Ide      | insulin degrading enzyme                                         | 0.554002827  | 0.429647297 | Ide      | 1.785111678  | 15925  |
| 15979  | 100552_at   | Ifngr1   | interferon gamma receptor 1                                      | 0.568492795  | 0.479384672 | Ifngr1   | 1.343305268  | 15979  |
| 16145  | 160933_at   | Igtg     | interferon gamma induced GTPase                                  | -0.153604367 | 0.908363662 | Igtg     | 1.326585882  | 16145  |
| 16161  | 98240_at    | Il12rb1  | interleukin 12 receptor, beta 1                                  | 0.527051721  | 0.320979002 | Il12rb1  | 1.202551275  | 16161  |
| 16161  | 162408_f_at | Il12rb1  | interleukin 12 receptor, beta 1                                  | 0.404560526  | 0.451494847 | Il12rb1  | 1.202551275  | 16161  |
| 16162  | 99323_at    | Il12rb2  | interleukin 12 receptor, beta 2                                  | 0.525959163  | 0.293908761 | Il12rb2  | 3.04663077   | 16162  |
| 16184  | 101917_at   | Il2ra    | interleukin 2 receptor, alpha chain                              | 0.21121351   | NA          | Il2ra    | 3.973609887  | 16184  |
| 16185  | 100764_at   | Il2rb    | interleukin 2 receptor, beta chain                               | 0.186910835  | 0.923825429 | Il2rb    | 1.67510492   | 16185  |
| 16211  | 93111_at    | Kpnb1    | karyopherin (importin) beta 1                                    | -1.007224773 | 0.164479691 | Kpnb1    | 1.691541402  | 16211  |
| 16211  | 161936_at   | Kpnb1    | karyopherin (importin) beta 1                                    | 0.023938163  | NA          | Kpnb1    | 1.691541402  | 16211  |
| 16319  | 104468_at   | Incepn   | inner centromere protein                                         | 0.053228298  | 0.973795497 | Incepn   | 1.066851275  | 16319  |
| 16319  | 93758_at    | Incepn   | inner centromere protein                                         | 0.336699584  | 0.680281942 | Incepn   | 1.066851275  | 16319  |
| 16364  | 92737_at    | Irf4     | interferon regulatory factor 4                                   | 0.689458838  | 0.432797556 | Irf4     | 2.07791664   | 16364  |
| 16423  | 95020_at    | Cd47     | CD47 antigen (Rh-related antigen, integrin-associated signal     | 0.186635304  | 0.929772549 | Cd47     | 1.199844882  | 16423  |
| 16423  | 103611_at   | Cd47     | CD47 antigen (Rh-related antigen, integrin-associated signal     | -0.091206605 | 0.965542009 | Cd47     | 1.199844882  | 16423  |
| 16430  | 161285_r_at | Stt3a    | STT3, subunit of the oligosaccharyltransferase complex, hom      | 0.104573735  | NA          | Stt3a    | 1.502848804  | 16430  |
| 16430  | 98922_at    | Stt3a    | STT3, subunit of the oligosaccharyltransferase complex, hom      | -0.07323372  | 0.958912883 | Stt3a    | 1.502848804  | 16430  |
| 16551  | 99541_at    | Kif11    | kinesin family member 11                                         | 1.041397658  | 0.110118574 | Kif11    | 3.888518638  | 16551  |
| 16571  | 104644_at   | Kif4     | kinesin family member 4                                          | 0.58750845   | 0.373899002 | Kif4     | 2.694669867  | 16571  |
| 16573  | 160417_at   | Kif5b    | kinesin family member 5B                                         | -0.007705804 | 0.999145614 | Kif5b    | 1.223881849  | 16573  |
| 16646  | 101370_at   | Kpna1    | karyopherin (importin) alpha 1                                   | 0.059668706  | 0.974723784 | Kpna1    | 1.02767307   | 16646  |
| 16647  | 92790_at    | Kpna2    | karyopherin (importin) alpha 2                                   | 0.90835194   | 0.388445777 | Kpna2    | 2.666602283  | 16647  |
| 16835  | 160832_at   | Ldlr     | low density lipoprotein receptor                                 | -0.45205972  | 0.435770844 | Ldlr     | 1.34994053   | 16835  |
| 16881  | 162004_i_at | Lig1     | ligase I, DNA, ATP-dependent                                     | -0.357361061 | 0.649419619 | Lig1     | 2.490524041  | 16881  |
| 16881  | 92551_at    | Lig1     | ligase I, DNA, ATP-dependent                                     | 0.467975815  | 0.315789471 | Lig1     | 2.490524041  | 16881  |
| 16906  | 160517_at   | Lmnb1    | lamin B1                                                         | 0.526418706  | 0.371818668 | Lmnb1    | 1.101521218  | 16906  |
| 170439 | 94418_at    | Elov6    | ELOVL family member 6, elongation of long chain fatty acids      | -0.447189199 | 0.386241725 | Elov6    | 1.133909238  | 170439 |
| 170439 | 103665_at   | Elov6    | ELOVL family member 6, elongation of long chain fatty acids      | -0.529796747 | 0.312748346 | Elov6    | 1.133909238  | 170439 |
| 170942 | 98525_f_at  | Erd1     | erythroid differentiation regulator 1                            | -1.167302122 | 0.228047291 | Erd1     | 1.289405929  | 170942 |
| 17164  | 95721_at    | Mapkapk2 | MAP kinase-activated protein kinase 2                            | 0.129564812  | 0.932157866 | Mapkapk2 | 1.308156656  | 17164  |
| 17164  | 160353_i_at | Mapkapk2 | MAP kinase-activated protein kinase 2                            | 0.256955947  | NA          | Mapkapk2 | 1.308156656  | 17164  |
| 17193  | 103285_at   | Mbd4     | methyl-CpG binding domain protein 4                              | 0.081653304  | 0.958912883 | Mbd4     | 1.024583637  | 17193  |
| 17215  | 160496_s_at | Mcm3     | minichromosome maintenance deficient 3 (S. cerevisiae)           | 0.441267382  | 0.584107937 | Mcm3     | 3.242458641  | 17215  |
| 17215  | 100062_at   | Mcm3     | minichromosome maintenance deficient 3 (S. cerevisiae)           | 0.499617979  | 0.761892456 | Mcm3     | 3.242458641  | 17215  |
| 17216  | 93112_at    | Mcm2     | minichromosome maintenance deficient 2 mitotin (S. cerevi        | 0.312714654  | 0.697648235 | Mcm2     | 2.084229369  | 17216  |
| 17217  | 93041_at    | Mcm4     | minichromosome maintenance deficient 4 homolog (S. cerev         | 0.394903006  | 0.67426874  | Mcm4     | 2.494924062  | 17217  |
| 17218  | 162102_r_at | Mcm5     | minichromosome maintenance deficient 5, cell division cycle      | 0.044414424  | 0.973050659 | Mcm5     | 2.605195427  | 17218  |
| 17218  | 100156_at   | Mcm5     | minichromosome maintenance deficient 5, cell division cycle      | 0.508275737  | 0.556285218 | Mcm5     | 2.605195427  | 17218  |
| 17219  | 100149_at   | Mcm6     | minichromosome maintenance deficient 6 (MIS5 homolog, S          | 0.089153178  | NA          | Mcm6     | 2.861088678  | 17219  |
| 17222  | 99068_at    | Anapc1   | anaphase promoting complex subunit 1                             | -0.397977957 | 0.578289578 | Anapc1   | 1.061969633  | 17222  |
| 17222  | 101377_at   | Anapc1   | anaphase promoting complex subunit 1                             | -0.107052764 | NA          | Anapc1   | 1.061969633  | 17222  |
| 17319  | 94849_at    | Mif      | macrophage migration inhibitory factor                           | -0.11369101  | NA          | Mif      | 1.710346351  | 17319  |
| 17319  | 94848_at    | Mif      | macrophage migration inhibitory factor                           | 0.087861499  | 0.950433011 | Mif      | 1.710346351  | 17319  |
| 17345  | 161931_r_at | Mki67    | antigen identified by monoclonal antibody Ki 67                  | 0.204903705  | 0.903216908 | Mki67    | 5.483057145  | 17345  |
| 17345  | 99457_at    | Mki67    | antigen identified by monoclonal antibody Ki 67                  | 2.452735424  | 0.061600569 | Mki67    | 5.483057145  | 17345  |
| 17448  | 93991_at    | Mdh2     | malate dehydrogenase 2, NAD (mitochondrial)                      | 0.073700484  | 0.960669676 | Mdh2     | 1.220584733  | 17448  |
| 17449  | 97508_at    | Mdh1     | malate dehydrogenase 1, NAD (soluble)                            | 0.091396125  | NA          | Mdh1     | 1.068515669  | 17449  |
| 17463  | 103350_at   | Psm17    | proteasome (prosome, macropain) 26S subunit, non-ATPase          | -0.139372738 | 0.941382    | Psm17    | 1.422732406  | 17463  |
| 17535  | 94376_s_at  | Mre11a   | meiotic recombination 11 homolog A (S. cerevisiae)               | 0.125806345  | NA          | Mre11a   | 1.226006492  | 17535  |
| 17688  | 93299_at    | Msh6     | mutS homolog 6 (E. coli)                                         | -0.216490528 | NA          | Msh6     | 1.778063871  | 17688  |
| 17713  | 104057_at   | Grpel1   | GrpE-like 1, mitochondrial                                       | 0.092566509  | 0.948613495 | Grpel1   | 1.143027305  | 17713  |
| 17768  | 161478_at   | Mthfd2   | methylene tetrahydrofolate dehydrogenase (NAD+ dependen          | 0.081617904  | 0.953391829 | Mthfd2   | 1.272063684  | 17768  |
| 17768  | 100046_at   | Mthfd2   | methylene tetrahydrofolate dehydrogenase (NAD+ dependen          | -0.009882249 | 0.995618995 | Mthfd2   | 1.272063684  | 17768  |
| 17865  | 100023_at   | Mybl2    | myeloblastosis oncogene-like 2                                   | 0.203513707  | 0.844536943 | Mybl2    | 1.335589459  | 17865  |
| 17865  | 161160_f_at | Mybl2    | myeloblastosis oncogene-like 2                                   | 0.067287205  | NA          | Mybl2    | 1.335589459  | 17865  |
| 17975  | 100144_at   | Ncl      | nucleolin                                                        | -0.421029822 | 0.747282067 | Ncl      | 1.314916636  | 17975  |
| 18005  | 100885_at   | Nck2     | NIMA (never in mitosis gene a)-related expressed kinase 2        | 0.373379828  | 0.638987683 | Nck2     | 1.062074412  | 18005  |
| 18021  | 97975_at    | Nfatc3   | nuclear factor of activated T cells, cytoplasmic, calcineurin de | 0.655562043  | 0.290924416 | Nfatc3   | 1.155258262  | 18021  |

|        |             |          |                                                                  |              |             |          |             |        |
|--------|-------------|----------|------------------------------------------------------------------|--------------|-------------|----------|-------------|--------|
| 18021  | 102050_at   | Nfate3   | nuclear factor of activated T cells, cytoplasmic, calcineurin de | -0.033691185 | 0.979027229 | Nfate3   | 1.155258262 | 18021  |
| 18102  | 161161_r_at | Nme1     | NME/NM23 nucleoside diphosphate kinase 1                         | -0.014514428 | NA          | Nme1     | 1.599261828 | 18102  |
| 18102  | 92794_f_at  | Nme1     | NME/NM23 nucleoside diphosphate kinase 1                         | -0.364083235 | 0.680256771 | Nme1     | 1.599261828 | 18102  |
| 18107  | 102047_at   | Nmt1     | N-myristoyltransferase 1                                         | 0.229618536  | 0.91966012  | Nmt1     | 1.352234655 | 18107  |
| 18107  | 102980_at   | Nmt1     | N-myristoyltransferase 1                                         | -0.0550821   | NA          | Nmt1     | 1.352234655 | 18107  |
| 18114  | 98604_at    | Rrp1     | ribosomal RNA processing 1 homolog (S. cerevisiae)               | -0.322194514 | 0.888829681 | Rrp1     | 1.207628701 | 18114  |
| 18120  | 94283_at    | Mrpl49   | mitochondrial ribosomal protein L49                              | -0.068037208 | 0.960669676 | Mrpl49   | 1.225433754 | 18120  |
| 18120  | 161597_r_at | Mrpl49   | mitochondrial ribosomal protein L49                              | -0.04659323  | NA          | Mrpl49   | 1.225433754 | 18120  |
| 18140  | 99564_at    | Uhrf1    | ubiquitin-like, containing PHD and RING finger domains, 1        | 0.340824136  | 0.739233638 | Uhrf1    | 2.634870671 | 18140  |
| 18221  | 101033_at   | Nude     | nuclear distribution gene C homolog (Aspergillus)                | -0.001142691 | NA          | Nude     | 1.22011914  | 18221  |
| 18263  | 160084_at   | Odc1     | ornithine decarboxylase, structural 1                            | -0.079516326 | 0.963254904 | Odc1     | 1.759061787 | 18263  |
| 18392  | 92458_at    | Orc1     | origin recognition complex, subunit 1                            | 0.034295953  | NA          | Orc1     | 1.430958392 | 18392  |
| 18453  | 161926_r_at | P4hb     | prolyl 4-hydroxylase, beta polypeptide                           | 0.106492453  | 0.941356083 | P4hb     | 1.044441746 | 18453  |
| 18453  | 93108_at    | P4hb     | prolyl 4-hydroxylase, beta polypeptide                           | -0.272074794 | 0.684296515 | P4hb     | 1.044441746 | 18453  |
| 18458  | 100720_at   | Pabpc1   | poly(A) binding protein, cytoplasmic 1                           | -0.26909021  | 0.853552709 | Pabpc1   | 1.412771833 | 18458  |
| 18521  | 92621_at    | Pcbp2    | poly(rC) binding protein 2                                       | -0.194407232 | 0.913958079 | Pcbp2    | 1.251685725 | 18521  |
| 18538  | 101065_at   | Pcna     | proliferating cell nuclear antigen                               | 0.101258869  | 0.963254904 | Pcna     | 2.119163592 | 18538  |
| 18571  | 96252_at    | Pded61p  | programmed cell death 6 interacting protein                      | -0.155989949 | 0.932004521 | Pded61p  | 1.012323889 | 18571  |
| 18571  | 95040_at    | Pded61p  | programmed cell death 6 interacting protein                      | -0.029349617 | 0.980325583 | Pded61p  | 1.012323889 | 18571  |
| 18648  | 160091_at   | Pgam1    | phosphoglycerate mutase 1                                        | 0.166769844  | NA          | Pgam1    | 1.59496517  | 18648  |
| 18655  | 93346_at    | Pgk1     | phosphoglycerate kinase 1                                        | -0.014302157 | 0.998186991 | Pgk1     | 2.259811462 | 18655  |
| 18746  | 162032_f_at | Pkm      | pyruvate kinase, muscle                                          | 0.161146343  | 0.903233646 | Pkm      | 1.843374575 | 18746  |
| 18746  | 96066_s_at  | Pkm      | pyruvate kinase, muscle                                          | 0.259559086  | 0.877324261 | Pkm      | 1.843374575 | 18746  |
| 18750  | 102299_at   | Prkca    | protein kinase C, alpha                                          | 0.479762554  | 0.665549153 | Prkca    | 1.388512469 | 18750  |
| 18786  | 94825_at    | Plaa     | phospholipase A2, activating protein                             | 0.143410878  | NA          | Plaa     | 1.582174187 | 18786  |
| 18786  | 160169_at   | Plaa     | phospholipase A2, activating protein                             | 0.229886685  | 0.92948193  | Plaa     | 1.582174187 | 18786  |
| 18813  | 100125_at   | Pa2g4    | proliferation-associated 2G4                                     | -0.291555514 | 0.636309277 | Pa2g4    | 1.815877209 | 18813  |
| 18813  | 16212_r_at  | Pa2g4    | proliferation-associated 2G4                                     | 0.007350278  | NA          | Pa2g4    | 1.815877209 | 18813  |
| 18817  | 93099_f_at  | Plk1     | polo-like kinase 1                                               | 0.565956247  | 0.235104212 | Plk1     | 3.422735439 | 18817  |
| 18817  | 101350_g_at | Plk1     | polo-like kinase 1                                               | 0.259158122  | NA          | Plk1     | 3.422735439 | 18817  |
| 18817  | 161292_f_at | Plk1     | polo-like kinase 1                                               | 0.243609098  | NA          | Plk1     | 3.422735439 | 18817  |
| 18824  | 93323_at    | Plp2     | proteolipid protein 2                                            | 0.577569068  | 0.356557829 | Plp2     | 2.164230635 | 18824  |
| 18854  | 99015_at    | Pml      | promyelocytic leukemia                                           | -0.117985665 | NA          | Pml      | 1.028150071 | 18854  |
| 18938  | 160078_at   | Ppp1r14b | protein phosphatase 1, regulatory (inhibitor) subunit 14B        | -0.486329999 | 0.405250946 | Ppp1r14b | 1.280601395 | 18938  |
| 18950  | 93290_at    | Pnp      | purine-nucleoside phosphorylase                                  | 0.525060794  | 0.552748747 | Pnp      | 1.60655051  | 18950  |
| 18968  | 103207_at   | Pola1    | polymerase (DNA directed), alpha 1                               | 0.859022836  | 0.308532112 | Pola1    | 2.022330606 | 18968  |
| 18969  | 161739_r_at | Pola2    | polymerase (DNA directed), alpha 2                               | -0.0157112   | 0.989611027 | Pola2    | 1.629025242 | 18969  |
| 18969  | 98006_at    | Pola2    | polymerase (DNA directed), alpha 2                               | -0.127689815 | NA          | Pola2    | 1.629025242 | 18969  |
| 18972  | 98155_r_at  | Pold2    | polymerase (DNA directed), delta 2, regulatory subunit           | 0.04833898   | 0.973497364 | Pold2    | 1.124254741 | 18972  |
| 18974  | 101920_at   | Pole2    | polymerase (DNA directed), epsilon 2 (p59 subunit)               | -0.018409721 | 0.986969008 | Pole2    | 1.546811357 | 18974  |
| 19053  | 101101_at   | Ppp2cb   | protein phosphatase 2 (formerly 2A), catalytic subunit, beta i   | 0.473854426  | 0.769083888 | Ppp2cb   | 1.180649838 | 19053  |
| 19057  | 160948_at   | Ppp3cc   | protein phosphatase 3, catalytic subunit, gamma isoform          | 0.587758259  | 0.340198522 | Ppp3cc   | 1.089208957 | 19057  |
| 19072  | 161459_f_at | Prep     | prolyl endopeptidase                                             | 0.00388005   | NA          | Prep     | 1.008975759 | 19072  |
| 19072  | 100983_at   | Prep     | prolyl endopeptidase                                             | 0.203300449  | NA          | Prep     | 1.008975759 | 19072  |
| 19075  | 96772_at    | Prim1    | DNA primase, p49 subunit                                         | 0.23581612   | NA          | Prim1    | 2.67217247  | 19075  |
| 19076  | 95549_at    | Prim2    | DNA primase, p58 subunit                                         | 0.283610462  | NA          | Prim2    | 1.491442853 | 19076  |
| 19172  | 98556_at    | Psbm4    | proteasome (prosome, macropain) subunit, beta type 4             | -0.061148234 | NA          | Psbm4    | 1.005868541 | 19172  |
| 19172  | 98558_r_at  | Psbm4    | proteasome (prosome, macropain) subunit, beta type 4             | 0.077447704  | NA          | Psbm4    | 1.005868541 | 19172  |
| 19172  | 98557_f_at  | Psbm4    | proteasome (prosome, macropain) subunit, beta type 4             | -0.102398691 | 0.9628001   | Psbm4    | 1.005868541 | 19172  |
| 19177  | 94263_f_at  | Psbm7    | proteasome (prosome, macropain) subunit, beta type 7             | 0.14980048   | 0.940766699 | Psbm7    | 1.046320852 | 19177  |
| 19179  | 160152_at   | Psmc1    | protease (prosome, macropain) 26S subunit, ATPase 1              | 0.416428639  | 0.48537263  | Psmc1    | 1.359055644 | 19179  |
| 19192  | 93803_at    | Psmc3    | protease (prosome, macropain) activator subunit 3 (PA2           | -0.0357688   | 0.982632525 | Psmc3    | 1.138045245 | 19192  |
| 192159 | 98574_at    | Prpf8    | pre-mRNA processing factor 8                                     | 0.019438059  | 0.987691962 | Prpf8    | 1.029608421 | 192159 |
| 19231  | 100718_at   | NA       | NA                                                               | -0.343254546 | 0.745248249 | Ptma     | 1.081307645 | 19231  |
| 192662 | 96360_at    | Arhgd1a  | Rho GDP dissociation inhibitor (GDI) alpha                       | 0.263615625  | 0.799778045 | Arhgd1a  | 1.237640709 | 192662 |
| 19324  | 92883_at    | NA       | NA                                                               | 0.050707325  | NA          | Rab1a    | 1.751194707 | 19324  |
| 19324  | 92882_at    | Rab1     | RAB1, member RAS oncogene family                                 | 0.310238038  | 0.870655202 | Rab1a    | 1.751194707 | 19324  |
| 19325  | 101933_at   | Rab10    | RAB10, member RAS oncogene family                                | -0.026818578 | 0.981235527 | Rab10    | 1.32139105  | 19325  |
| 19325  | 160149_at   | Rab10    | RAB10, member RAS oncogene family                                | -0.52535882  | 0.592270539 | Rab10    | 1.32139105  | 19325  |
| 19348  | 160501_at   | Kif20a   | kinesin family member 20A                                        | 0.799090052  | NA          | Kif20a   | 2.714459652 | 19348  |
| 19348  | 161856_f_at | Kif20a   | kinesin family member 20A                                        | 0.529746689  | 0.304185849 | Kif20a   | 2.714459652 | 19348  |
| 19353  | 101555_at   | Rac1     | RAS-related C3 botulinum substrate 1                             | 0.054221316  | 0.975981246 | Rac1     | 1.366469348 | 19353  |
| 19354  | 103579_at   | Rac2     | RAS-related C3 botulinum substrate 2                             | 0.686724958  | 0.119108758 | Rac2     | 1.040539963 | 19354  |
| 19357  | 94768_at    | Rad21    | RAD21 homolog (S. pombe)                                         | 0.360537977  | 0.901544291 | Rad21    | 1.310375927 | 19357  |
| 19359  | 96102_i_at  | Rad23b   | RAD23b homolog (S. cerevisiae)                                   | -0.413503051 | 0.517085939 | Rad23b   | 1.10182133  | 19359  |
| 19359  | 96103_f_at  | Rad23b   | RAD23b homolog (S. cerevisiae)                                   | -0.210636269 | 0.842472769 | Rad23b   | 1.10182133  | 19359  |
| 19360  | 100459_at   | Rad50    | RAD50 homolog (S. cerevisiae)                                    | -0.157238962 | 0.907781441 | Rad50    | 1.463946251 | 19360  |
| 19361  | 162232_r_at | Rad51    | RAD51 homolog                                                    | 0.100512743  | NA          | Rad51    | 2.658762583 | 19361  |
| 19361  | 104527_at   | Rad51    | RAD51 homolog                                                    | 0.30237106   | 0.668659124 | Rad51    | 2.658762583 | 19361  |

|        |             |            |                                                                 |              |             |          |             |        |
|--------|-------------|------------|-----------------------------------------------------------------|--------------|-------------|----------|-------------|--------|
| 19362  | 93676_at    | Rad51ap1   | RAD51 associated protein 1                                      | 0.060086775  | NA          | Rad51ap1 | 1.433335037 | 19362  |
| 19366  | 98971_at    | Rad541     | RAD54 like (S. cerevisiae)                                      | -0.077893842 | NA          | Rad541   | 1.093158796 | 19366  |
| 19384  | 101254_at   | NA         | NA                                                              | -0.04381276  | 0.980325583 | Ran      | 1.011709203 | 19384  |
| 19384  | 102821_s_at | NA         | NA                                                              | 0.304718491  | 0.849957674 | Ran      | 1.011709203 | 19384  |
| 19385  | 98573_r_at  | Ranbp1     | RAN binding protein 1                                           | -0.106275829 | 0.941382    | Ranbp1   | 1.332640028 | 19385  |
| 19645  | 161858_f_at | Rb1        | retinoblastoma 1                                                | 0.347267059  | NA          | Rb1      | 1.656967609 | 19645  |
| 19645  | 97948_at    | Rb1        | retinoblastoma 1                                                | 0.453078795  | 0.806914456 | Rb1      | 1.656967609 | 19645  |
| 19647  | 99364_at    | Rbbp6      | retinoblastoma binding protein 6                                | -0.211039551 | NA          | Rbbp6    | 1.070051925 | 19647  |
| 19647  | 99990_at    | Rbbp6      | retinoblastoma binding protein 6                                | -0.385419188 | 0.511867765 | Rbbp6    | 1.070051925 | 19647  |
| 19647  | 161760_s_at | Rbbp6      | retinoblastoma binding protein 6                                | -0.406470469 | NA          | Rbbp6    | 1.070051925 | 19647  |
| 19650  | 104476_at   | Rbl1       | retinoblastoma-like 1 (p107)                                    | -0.046887937 | 0.980325583 | Rbl1     | 1.25417249  | 19650  |
| 19687  | 98335_at    | Rfc1       | replication factor C (activator 1) 1                            | -0.728957024 | 0.399788483 | Rfc1     | 1.27144758  | 19687  |
| 19687  | 98336_s_at  | Rfc1       | replication factor C (activator 1) 1                            | -0.232370701 | NA          | Rfc1     | 1.27144758  | 19687  |
| 19691  | 160741_at   | Recq1      | RecQ protein-like                                               | 0.079875374  | 0.956178166 | Recq1    | 1.113992793 | 19691  |
| 19707  | 160888_at   | Reps1      | RalBP1 associated Eps domain containing protein                 | 0.271545913  | NA          | Reps1    | 1.038340505 | 19707  |
| 19826  | 93518_at    | Rnps1      | ribonucleic acid binding protein S1                             | 0.071752393  | NA          | Rnps1    | 1.124314372 | 19826  |
| 19891  | 98943_at    | Rpa2       | replication protein A2                                          | 1.128355144  | 0.061600569 | Rpa2     | 1.260271359 | 19891  |
| 20020  | 103054_at   | Polr2a     | polymerase (RNA) II (DNA directed) polypeptide A                | 0.154667167  | 0.921673836 | Polr2a   | 1.158432052 | 20020  |
| 20020  | 103055_r_at | Polr2a     | polymerase (RNA) II (DNA directed) polypeptide A                | 0.125768304  | 0.943019651 | Polr2a   | 1.158432052 | 20020  |
| 20133  | 100612_at   | Rrm1       | ribonucleotide reductase M1                                     | 0.655207473  | 0.269833362 | Rrm1     | 2.729250833 | 20133  |
| 20133  | 161731_at   | Rrm1       | ribonucleotide reductase M1                                     | -0.013321473 | NA          | Rrm1     | 2.729250833 | 20133  |
| 20168  | 93839_at    | Rtn3       | reticulon 3                                                     | 0.154395781  | 0.918592278 | Rtn3     | 1.677093741 | 20168  |
| 20168  | 97077_f_at  | Rtn3       | reticulon 3                                                     | 0.247059598  | 0.769375168 | Rtn3     | 1.677093741 | 20168  |
| 20218  | 101508_at   | Khndrbs1   | KH domain containing, RNA binding, signal transduction ass      | -0.072486837 | NA          | Khndrbs1 | 1.045326338 | 20218  |
| 20382  | 95791_s_at  | Srsf2      | serine/arginine-rich splicing factor 2                          | -0.123282895 | NA          | Srsf2    | 1.303699413 | 20382  |
| 20382  | 94017_s_at  | Srsf2      | serine/arginine-rich splicing factor 2                          | -0.432684378 | 0.48537263  | Srsf2    | 1.303699413 | 20382  |
| 20425  | 104700_at   | Shmt1      | serine hydroxymethyltransferase 1 (soluble)                     | 0.10931181   | NA          | Shmt1    | 1.198735883 | 20425  |
| 20425  | 98459_at    | Shmt1      | serine hydroxymethyltransferase 1 (soluble)                     | -0.163074501 | NA          | Shmt1    | 1.198735883 | 20425  |
| 20460  | 92367_at    | Stil       | Scl/Tali interrupting locus                                     | 0.016714204  | NA          | Stil     | 2.928779982 | 20460  |
| 20501  | 101588_at   | Slc16a1    | solute carrier family 16 (monocarboxylic acid transporters), t  | -0.092506892 | NA          | Slc16a1  | 1.190604032 | 20501  |
| 20525  | 93738_at    | Slc2a1     | solute carrier family 2 (facilitated glucose transporter), mem  | 0.2796303    | 0.659831394 | Slc2a1   | 1.169877023 | 20525  |
| 20539  | 104221_at   | Skl7a5     | solute carrier family 7 (cationic amino acid transporter, y+ s) | -0.168826108 | NA          | Skl7a5   | 2.111589017 | 20539  |
| 20557  | 98299_s_at  | NA         | NA                                                              | 0.038630592  | NA          | Slfm3    | 1.676844388 | 20557  |
| 20588  | 102062_at   | Smarcc1    | SWI/SNF related, matrix associated, actin dependent regula      | -0.165214741 | 0.951334568 | Smarcc1  | 1.884264077 | 20588  |
| 20624  | 101530_at   | Eftud2     | elongation factor Tu GTP binding domain containing 2            | -0.113621212 | 0.936430222 | Eftud2   | 1.089564708 | 20624  |
| 207352 | 103871_at   | Sec23ip    | Sec23 interacting protein                                       | -0.124126235 | 0.96281589  | Sec23ip  | 1.276135148 | 207352 |
| 20747  | 160096_at   | Spop       | speckle-type POZ protein                                        | -0.428439859 | 0.512094141 | Spop     | 1.338123576 | 20747  |
| 20768  | 93557_at    | Sephs2     | selenophosphate synthetase 2                                    | 0.407590355  | 0.640564166 | Sephs2   | 1.084068575 | 20768  |
| 20775  | 94322_at    | Sqle       | squalene epoxidase                                              | -0.155699789 | 0.908037691 | Sqle     | 1.679188032 | 20775  |
| 20833  | 95069_at    | Ssrp1      | structure specific recognition protein 1                        | -0.235121824 | 0.86502427  | Ssrp1    | 1.194354057 | 20833  |
| 208715 | 94325_at    | Hmgcs1     | 3-hydroxy-3-methylglutaryl-Coenzyme A synthase 1                | -0.193121565 | 0.950489095 | Hmgcs1   | 1.951430373 | 208715 |
| 20873  | 98996_at    | Plk4       | polo-like kinase 4                                              | 0.649946597  | 0.544445665 | Plk4     | 1.409664623 | 20873  |
| 20877  | 98469_at    | Aurkb      | aurora kinase B                                                 | 0.578117529  | 0.19985694  | Aurkb    | 1.713099174 | 20877  |
| 20878  | 92639_at    | Aurka      | aurora kinase A                                                 | 0.606406083  | 0.258284165 | Aurka    | 1.34349982  | 20878  |
| 20901  | 94292_at    | Strap      | serine/threonine kinase receptor associated protein             | -0.140764785 | 0.956699082 | Strap    | 1.457907648 | 20901  |
| 20973  | 93586_at    | Syngt2     | synaptogyrin 2                                                  | 0.278985778  | NA          | Syngt2   | 1.328231945 | 20973  |
| 210998 | 98013_at    | D15Erd621e | DNA segment, Chr 15, ERATO Doi 621, expressed                   | -0.314471436 | 0.907781441 | Fam91a1  | 1.384562128 | 210998 |
| 212880 | 101423_at   | Ddx46      | DEAD (Asp-Glu-Ala-Asp) box polypeptide 46                       | 0.032470725  | NA          | Ddx46    | 1.270276797 | 212880 |
| 21335  | 97238_at    | Taec3      | transforming, acidic coiled-coil containing protein 3           | 1.204956627  | NA          | Taec3    | 2.919058347 | 21335  |
| 213742 | 99126_at    | Xist       | inactive X specific transcripts                                 | -0.866402208 | 0.371194649 | Xist     | 5.899143598 | 213742 |
| 213827 | 94514_s_at  | Arcn1      | archain 1                                                       | 0.069535702  | 0.959127931 | Arcn1    | 1.29683801  | 213827 |
| 213827 | 94512_f_at  | Arcn1      | archain 1                                                       | -0.057316546 | 0.967716366 | Arcn1    | 1.29683801  | 213827 |
| 213827 | 94513_r_at  | Arcn1      | archain 1                                                       | 0.272058408  | 0.842747643 | Arcn1    | 1.29683801  | 213827 |
| 21454  | 162443_at   | Tcp1       | t-complex protein 1                                             | 0.094168296  | NA          | Tcp1     | 1.250350141 | 21454  |
| 21454  | 94218_at    | Tcp1       | t-complex protein 1                                             | -0.324938813 | 0.59888743  | Tcp1     | 1.250350141 | 21454  |
| 215387 | 161172_f_at | Ncaph      | non-SMC condensin I complex, subunit H                          | 0.566286768  | NA          | Ncaph    | 2.693022633 | 215387 |
| 215387 | 95753_at    | Ncaph      | non-SMC condensin I complex, subunit H                          | 0.795282513  | NA          | Ncaph    | 2.693022633 | 215387 |
| 216443 | 96138_at    | Mars       | methionine-tRNA synthetase                                      | -0.099593688 | NA          | Mars     | 1.340767201 | 216443 |
| 217039 | 96513_at    | Gnbp2      | gametogenin binding protein 2                                   | -0.654127091 | 0.555764277 | Gnbp2    | 1.183854154 | 217039 |
| 217109 | 161737_at   | Utp18      | UTP18, small subunit (SSU) processome component, homolo         | -0.06013336  | NA          | Utp18    | 1.21590846  | 217109 |
| 217109 | 103056_at   | Utp18      | UTP18, small subunit (SSU) processome component, homolo         | -0.575391069 | 0.388347454 | Utp18    | 1.21590846  | 217109 |
| 21749  | 160879_at   | Terf1      | telomeric repeat binding factor 1                               | 0.141384963  | NA          | Terf1    | 1.506393941 | 21749  |
| 21749  | 99920_at    | Terf1      | telomeric repeat binding factor 1                               | 0.088602964  | NA          | Terf1    | 1.506393941 | 21749  |
| 21762  | 92645_at    | Psm2       | proteasome (prosome, macropain) 26S subunit, non-ATPase         | -0.12098752  | 0.936157768 | Psm2     | 1.243694403 | 21762  |
| 217653 | 103308_at   | M18Bbp1    | M18 binding protein 1                                           | 0.498229405  | 0.273152081 | M18Bbp1  | 2.625096136 | 217653 |
| 21781  | 97565_f_at  | Tfdp1      | transcription factor Dp 1                                       | -0.062456573 | NA          | Tfdp1    | 2.15958154  | 21781  |
| 21781  | 101959_r_at | Tfdp1      | transcription factor Dp 1                                       | 0.733858071  | 0.304185849 | Tfdp1    | 2.15958154  | 21781  |
| 21781  | 101958_f_at | Tfdp1      | transcription factor Dp 1                                       | 0.35225757   | 0.831822927 | Tfdp1    | 2.15958154  | 21781  |
| 218236 | 95488_at    | Fam120a    | family with sequence similarity 120, member A                   | -0.162690761 | 0.953148363 | Fam120a  | 1.641697168 | 218236 |

|        |             |            |                                                           |              |             |               |             |        |
|--------|-------------|------------|-----------------------------------------------------------|--------------|-------------|---------------|-------------|--------|
| 21854  | 94860_at    | Timm17a    | translocase of inner mitochondrial membrane 17a           | -0.120209174 | 0.943776547 | Timm17a       | 1.695045795 | 21854  |
| 218973 | 96625_at    | Wdhhd1     | WD repeat and HMG-box DNA binding protein 1               | 0.213891511  | 0.832148182 | Wdhhd1        | 2.131646093 | 218973 |
| 218977 | 98489_at    | Dlgap5     | discs, large (Drosophila) homolog-associated protein 5    | 0.527513348  | 0.251906047 | Dlgap5        | 2.409089258 | 218977 |
| 21915  | 98618_at    | Dtymk      | deoxythymidylate kinase                                   | -0.0665805   | NA          | Dtymk         | 1.486199902 | 21915  |
| 21915  | 98619_at    | Dtymk      | deoxythymidylate kinase                                   | -0.321900315 | 0.756743004 | Dtymk         | 1.486199902 | 21915  |
| 21917  | 92782_at    | Tmpo       | thymopoiectin                                             | 0.131556246  | 0.933412549 | Tmpo          | 1.526834652 | 21917  |
| 21917  | 98982_at    | Tmpo       | thymopoiectin                                             | 0.16742216   | 0.933412549 | Tmpo          | 1.526834652 | 21917  |
| 21917  | 92781_at    | Tmpo       | thymopoiectin                                             | -0.213472585 | NA          | Tmpo          | 1.526834652 | 21917  |
| 21936  | 104662_at   | Tnfrsf18   | tumor necrosis factor receptor superfamily, member 18     | -0.076114189 | 0.958823314 | Tnfrsf18      | 1.030059325 | 21936  |
| 21991  | 99566_at    | Tpi1       | triosephosphate isomerase 1                               | 0.413451964  | 0.459839668 | Tpi1          | 2.900398391 | 21991  |
| 22019  | 161537_f_at | Tpp2       | tripeptidyl peptidase II                                  | 0.204385122  | NA          | Tpp2          | 1.361576671 | 22019  |
| 22019  | 96730_at    | Tpp2       | tripeptidyl peptidase II                                  | 0.224720989  | 0.929987845 | Tpp2          | 1.361576671 | 22019  |
| 22027  | 160499_at   | Hsp90b1    | heat shock protein 90, beta (Grp94), member 1             | 0.054538337  | 0.972911278 | Hsp90b1       | 1.171099493 | 22027  |
| 22042  | 103958_g_at | Tfrc       | transferrin receptor                                      | -0.184754229 | NA          | Tfrc          | 2.208645152 | 22042  |
| 22042  | 103957_at   | Tfrc       | transferrin receptor                                      | -0.186925291 | NA          | Tfrc          | 2.208645152 | 22042  |
| 22099  | 93012_at    | Tsn        | translin                                                  | -0.010827688 | NA          | Tsn           | 1.544794618 | 22099  |
| 22137  | 103201_at   | Ttk        | Ttk protein kinase                                        | 0.671366587  | 0.162758745 | Ttk           | 1.849799996 | 22137  |
| 22142  | 100343_f_at | Tuba1a     | tubulin, alpha 1A                                         | -0.237576195 | 0.870655202 | Tuba1a        | 1.451812061 | 22142  |
| 22142  | 100342_i_at | Tuba1a     | tubulin, alpha 1A                                         | -0.379400263 | 0.63207898  | Tuba1a        | 1.451812061 | 22142  |
| 22143  | 98759_f_at  | NA         | NA                                                        | -0.25198315  | 0.83702518  | Tuba1b        | 1.719465391 | 22143  |
| 22146  | 101543_f_at | NA         | NA                                                        | -0.170138264 | 0.921649033 | Tuba1c        | 1.800418001 | 22146  |
| 22154  | 94788_f_at  | Tubb5      | tubulin, beta 5 class I                                   | -0.710983038 | 0.188212457 | Tubb5         | 1.255554106 | 22154  |
| 22154  | 94789_r_at  | Tubb5      | tubulin, beta 5 class I                                   | -0.524847839 | 0.362037601 | Tubb5         | 1.255554106 | 22154  |
| 22166  | 92807_at    | Txn1       | thioredoxin 1                                             | 1.121258858  | 0.098908891 | Txn1          | 1.964804071 | 22166  |
| 22171  | 93237_s_at  | NA         | NA                                                        | 0.620603429  | 0.228047291 | Tyms          | 2.970218053 | 22171  |
| 22171  | 93236_s_at  | NA         | NA                                                        | 0.438316757  | 0.461041308 | Tyms          | 2.970218053 | 22171  |
| 22172  | 100396_i_at | Tyms-ps    | thymidylate synthase, pseudogene                          | 0.308919493  | 0.854510563 | Tyms-ps       | 2.382760407 | 22172  |
| 22172  | 100756_r_at | Tyms-ps    | thymidylate synthase, pseudogene                          | 0.082566396  | NA          | Tyms-ps       | 2.382760407 | 22172  |
| 22201  | 92616_at    | Uba1       | ubiquitin-like modifier activating enzyme 1               | 0.237803903  | 0.847556094 | Uba1          | 1.138535042 | 22201  |
| 22201  | 162497_r_at | Uba1       | ubiquitin-like modifier activating enzyme 1               | 0.155361287  | NA          | Uba1          | 1.138535042 | 22201  |
| 22247  | 161092_at   | Umps       | uridine monophosphate synthetase                          | -0.050489009 | NA          | Umps          | 1.490298678 | 22247  |
| 22247  | 101455_at   | Umps       | uridine monophosphate synthetase                          | -0.027441582 | NA          | Umps          | 1.490298678 | 22247  |
| 22247  | 162071_i_at | Umps       | uridine monophosphate synthetase                          | 0.106401289  | 0.958141861 | Umps          | 1.490298678 | 22247  |
| 22272  | 93844_at    | Uqcrc      | ubiquinol-cytochrome c reductase, complex III subunit VII | 0.413515725  | 0.574815984 | Uqcrc         | 1.068108545 | 22272  |
| 22289  | 102222_at   | Kdm6a      | lysine (K)-specific demethylase 6A                        | -0.479459659 | 0.630389729 | Kdm6a         | 1.079759987 | 22289  |
| 22333  | 98139_at    | Vdac1      | voltage-dependent anion channel 1                         | -0.044900028 | NA          | Vdac1         | 1.019000498 | 22333  |
| 22352  | 101046_at   | Vim        | vimentin                                                  | -0.054296634 | NA          | Vim           | 2.360662396 | 22352  |
| 22367  | 97393_at    | Vrki       | vaccinia related kinase 1                                 | -0.25906827  | 0.739326797 | Vrki          | 1.009689433 | 22367  |
| 223691 | 96942_at    | Eif3l      | eukaryotic translation initiation factor 3, subunit L     | -0.051355246 | 0.973497364 | Eif3l         | 1.16526276  | 223691 |
| 223691 | 162283_r_at | Eif3l      | eukaryotic translation initiation factor 3, subunit L     | 0.11488017   | NA          | Eif3l         | 1.16526276  | 223691 |
| 22375  | 161337_f_at | Wars       | tryptophanyl-HRNA synthetase                              | -0.065132619 | NA          | Wars          | 1.110429296 | 22375  |
| 22375  | 98606_s_at  | Wars       | tryptophanyl-HRNA synthetase                              | 0.097891611  | 0.948147955 | Wars          | 1.110429296 | 22375  |
| 22375  | 98605_at    | Wars       | tryptophanyl-HRNA synthetase                              | 0.075642666  | NA          | Wars          | 1.110429296 | 22375  |
| 22381  | 100523_r_at | Wbp5       | WW domain binding protein 5                               | 0.180815454  | 0.920351181 | Wbp5          | 1.20529089  | 22381  |
| 22381  | 100522_s_at | Wbp5       | WW domain binding protein 5                               | 0.480532579  | 0.654186202 | Wbp5          | 1.20529089  | 22381  |
| 22384  | 97278_at    | Eif4h      | eukaryotic translation initiation factor 4H               | -0.211448052 | NA          | Eif4h         | 1.157961489 | 22384  |
| 22385  | 92381_at    | Bazib      | bromodomain adjacent to zinc finger domain, 1B            | -0.06018789  | 0.967251179 | Bazib         | 1.068542947 | 22385  |
| 22385  | 103081_at   | Bazib      | bromodomain adjacent to zinc finger domain, 1B            | -0.178725753 | 0.907781441 | Bazib         | 1.068542947 | 22385  |
| 22390  | 101458_at   | Wee1       | WEE 1 homolog 1 (S. pombe)                                | 0.426710481  | 0.436143872 | Wee1          | 1.645976783 | 22390  |
| 224088 | 103667_at   | Atp13a3    | ATPase type 13A3                                          | -1.035230962 | 0.416203521 | Atp13a3       | 1.501299324 | 224088 |
| 224088 | 95978_at    | Atp13a3    | ATPase type 13A3                                          | 0.004792645  | 0.999646575 | Atp13a3       | 1.501299324 | 224088 |
| 224171 | 160973_at   | C330027Co9 | RIKEN cDNA C330027Co9 gene                                | 1.28787392   | NA          | C330027Co9Rik | 2.675957788 | 224171 |
| 224250 | 160228_at   | Cldnd25    | chudin 25                                                 | 0.29078564   | 0.648637306 | Cldnd1        | 1.185286507 | 224250 |
| 22433  | 94821_at    | Xbp1       | X-box binding protein 1                                   | 0.73584506   | 0.392137173 | Xbp1          | 1.596568854 | 22433  |
| 225027 | 96302_at    | Srsf7      | serine/arginine-rich splicing factor 7                    | -1.259340969 | 0.071777336 | Srsf7         | 1.268525024 | 225027 |
| 225027 | 160368_at   | Srsf7      | serine/arginine-rich splicing factor 7                    | -0.218904257 | NA          | Srsf7         | 1.268525024 | 225027 |
| 225363 | 98608_at    | Elfi       | eukaryotic translation termination factor 1               | -0.160108237 | 0.933412549 | Elfi          | 1.192430064 | 225363 |
| 225363 | 161344_r_at | Elfi       | eukaryotic translation termination factor 1               | 0.2068535    | 0.885279125 | Elfi          | 1.192430064 | 225363 |
| 225363 | 96754_s_at  | Elfi       | eukaryotic translation termination factor 1               | -0.18538124  | 0.922432602 | Elfi          | 1.192430064 | 225363 |
| 225363 | 96755_at    | Elfi       | eukaryotic translation termination factor 1               | -0.135802107 | 0.9413182   | Elfi          | 1.192430064 | 225363 |
| 225363 | 160451_at   | Elfi       | eukaryotic translation termination factor 1               | -0.122480376 | 0.947735767 | Elfi          | 1.192430064 | 225363 |
| 22608  | 93740_at    | Ybx1       | Y box protein 1                                           | -0.172045417 | 0.883750377 | Ybx1          | 1.190597337 | 22608  |
| 22619  | 103933_at   | Siae       | sialic acid acetyltransferase                             | -0.243021604 | 0.842460519 | Siae          | 1.121513391 | 22619  |
| 22627  | 160485_r_at | Ywhae      | tyrosine 3-monooxygenase/tryptophan 5-monooxygenase act   | 0.393527836  | 0.460856628 | Ywhae         | 1.180033598 | 22627  |
| 22629  | 97535_at    | Ywhah      | tyrosine 3-monooxygenase/tryptophan 5-monooxygenase act   | 0.040379823  | 0.983345921 | Ywhah         | 1.056110435 | 22629  |
| 22632  | 99020_at    | Yy1        | YY1 transcription factor                                  | 0.059144189  | 0.967716366 | Yy1           | 1.277966774 | 22632  |
| 22668  | 161894_r_at | Sfi        | splicing factor 1                                         | -0.161401701 | 0.908037691 | Sfi           | 1.184011555 | 22668  |
| 22668  | 99567_at    | Sfi        | splicing factor 1                                         | -0.032818072 | NA          | Sfi           | 1.184011555 | 22668  |
| 226757 | 160130_at   | Wdr26      | WD repeat domain 26                                       | -0.438658342 | 0.661077482 | Wdr26         | 1.129932307 | 226757 |

|        |             |          |                                                                  |              |             |          |             |        |
|--------|-------------|----------|------------------------------------------------------------------|--------------|-------------|----------|-------------|--------|
| 226757 | 104611_at   | Wdr26    | WD repeat domain 26                                              | 0.109351011  | NA          | Wdr26    | 1.129932307 | 226757 |
| 226757 | 104612_g_at | Wdr26    | WD repeat domain 26                                              | 0.021549846  | 0.986969008 | Wdr26    | 1.129932307 | 226757 |
| 226757 | 100297_at   | Wdr26    | WD repeat domain 26                                              | -0.730833716 | 0.370090862 | Wdr26    | 1.129932307 | 226757 |
| 22680  | 92771_at    | Zfp207   | zinc finger protein 207                                          | 0.132331456  | 0.956699082 | Zfp207   | 1.174350116 | 22680  |
| 22775  | 101193_at   | Ziki     | zinc finger protein interacting with K protein 1                 | 0.101349825  | NA          | Ziki     | 1.420097278 | 22775  |
| 22779  | 94630_at    | Ikzf2    | IKAROS family zinc finger 2                                      | 0.084957101  | 0.951495523 | Ikzf2    | 1.161436249 | 22779  |
| 22785  | 161230_r_at | Slc30a4  | solute carrier family 30 (zinc transporter), member 4            | -0.03053653  | NA          | Slc30a4  | 1.775569881 | 22785  |
| 22785  | 95571_at    | Slc30a4  | solute carrier family 30 (zinc transporter), member 4            | -0.279511764 | 0.654186202 | Slc30a4  | 1.775569881 | 22785  |
| 229700 | 161002_at   | Rbm15    | RNA binding motif protein 15                                     | -0.015498289 | NA          | Rbm15    | 1.086491557 | 229700 |
| 229841 | 161586_f_at | Cenpe    | centromere protein E                                             | 0.103169508  | NA          | Cenpe    | 2.046266696 | 229841 |
| 229841 | 93450_at    | Cenpe    | centromere protein E                                             | 0.270376699  | 0.806914456 | Cenpe    | 2.046266696 | 229841 |
| 229900 | 100880_at   | Gbp7     | guanylate binding protein 7                                      | 0.375901357  | 0.625796006 | Gbp7     | 1.155785138 | 229900 |
| 230075 | 92615_at    | Ndufb6   | NADH dehydrogenase (ubiquinone) 1 beta subcomplex, 6             | 0.472750071  | 0.312877024 | Ndufb6   | 1.205116598 | 230075 |
| 230075 | 161660_r_at | Ndufb6   | NADH dehydrogenase (ubiquinone) 1 beta subcomplex, 6             | 0.156510215  | NA          | Ndufb6   | 1.205116598 | 230075 |
| 230257 | 93829_at    | Ptbp3    | polypyrimidine tract binding protein 3                           | -0.086141817 | 0.958912883 | Ptbp3    | 1.624901321 | 230257 |
| 230484 | 160234_at   | Usp1     | ubiquitin specific peptidase 1                                   | -0.136975755 | 0.970827248 | Usp1     | 1.364089701 | 230484 |
| 230908 | 160377_at   | Tardbp   | TAR DNA binding protein                                          | -0.601447219 | 0.648637306 | Tardbp   | 1.149206413 | 230908 |
| 230908 | 104324_at   | Tardbp   | TAR DNA binding protein                                          | -0.564025496 | 0.48537263  | Tardbp   | 1.149206413 | 230908 |
| 231327 | 95554_at    | Ppat     | phosphoribosyl pyrophosphate amidotransferase                    | -0.056669556 | NA          | Ppat     | 1.789123188 | 231327 |
| 231327 | 95553_at    | Ppat     | phosphoribosyl pyrophosphate amidotransferase                    | 0.027937608  | 0.981235527 | Ppat     | 1.789123188 | 231327 |
| 231507 | 98092_at    | Plac8    | placenta-specific 8                                              | 0.867407097  | 0.221400252 | Plac8    | 1.176732854 | 231507 |
| 231874 | 160811_at   | Cczi     | CCZ1 vacuolar protein trafficking and biogenesis associated      | 0.222100917  | 0.834752205 | Cczi     | 1.256588611 | 231874 |
| 232157 | 95647_f_at  | Mobia    | MOB kinase activator 1A                                          | 0.307473122  | 0.909550644 | Mobia    | 1.26507021  | 232157 |
| 232157 | 95648_at    | Mobia    | MOB kinase activator 1A                                          | 0.395251439  | 0.590669526 | Mobia    | 1.26507021  | 232157 |
| 232341 | 94003_at    | Wnk1     | WNK lysine deficient protein kinase 1                            | -0.707606935 | 0.229105678 | Wnk1     | 1.690728632 | 232341 |
| 232341 | 160739_at   | Wnk1     | WNK lysine deficient protein kinase 1                            | -0.072205653 | NA          | Wnk1     | 1.690728632 | 232341 |
| 232341 | 161270_i_at | Wnk1     | WNK lysine deficient protein kinase 1                            | -0.33284977  | 0.927506286 | Wnk1     | 1.690728632 | 232341 |
| 233406 | 95032_at    | Prc1     | protein regulator of cytokinesis 1                               | 1.45016868   | 0.057614821 | Prc1     | 1.949710527 | 233406 |
| 233908 | 104355_at   | Fus      | fused in sarcoma                                                 | 0.12755597   | NA          | Fus      | 1.114328169 | 233908 |
| 234594 | 99512_at    | NA       | NA                                                               | -0.343446008 | 0.766529632 | Cnot1    | 1.346551043 | 234594 |
| 235442 | 104653_at   | Rab8b    | RAB8B, member RAS oncogene family                                | 0.322023255  | 0.559740452 | Rab8b    | 1.069075277 | 235442 |
| 235559 | 103071_at   | Topbp1   | topoisomerase (DNA) II binding protein 1                         | -0.238790649 | 0.919069158 | Topbp1   | 1.761921591 | 235559 |
| 236539 | 162168_r_at | Phgdh    | 3-phosphoglycerate dehydrogenase                                 | -0.060457685 | NA          | Phgdh    | 1.515817016 | 236539 |
| 236900 | 92810_at    | Pdk3     | pyruvate dehydrogenase kinase, isoenzyme 3                       | 0.281340562  | 0.907781441 | Pdk3     | 1.734700177 | 236900 |
| 23834  | 103821_at   | Cdc6     | cell division cycle 6                                            | 1.254202573  | 0.119108758 | Cdc6     | 2.133439982 | 23834  |
| 238799 | 99356_r_at  | Tnp01    | transporin 1                                                     | 0.204471799  | 0.898839757 | Tnp01    | 1.628209155 | 238799 |
| 238799 | 96762_at    | Tnp01    | transporin 1                                                     | -0.64944601  | 0.399044045 | Tnp01    | 1.628209155 | 238799 |
| 23918  | 100578_at   | NA       | NA                                                               | -0.904623827 | 0.16271395  | Impdh2   | 1.335967066 | 23918  |
| 239528 | 103994_at   | Ag02     | argonaute RISC catalytic subunit 2                               | -0.395850193 | 0.501503256 | Ag02     | 1.255434045 | 239528 |
| 245688 | 93081_at    | Rbbp7    | retinoblastoma binding protein 7                                 | -0.663556449 | 0.708824368 | Rbbp7    | 1.82792287  | 245688 |
| 245944 | 102670_at   | Vps54    | vacuolar protein sorting 54 (yeast)                              | -0.067958323 | 0.974723784 | Vps54    | 1.267733941 | 245944 |
| 26413  | 161583_at   | Mapk1    | mitogen-activated protein kinase 1                               | 0.209241599  | NA          | Mapk1    | 1.233799353 | 26413  |
| 26413  | 93253_at    | Mapk1    | mitogen-activated protein kinase 1                               | 0.277711645  | 0.686277268 | Mapk1    | 1.233799353 | 26413  |
| 26413  | 93254_at    | Mapk1    | mitogen-activated protein kinase 1                               | 0.043307481  | 0.980325583 | Mapk1    | 1.233799353 | 26413  |
| 26440  | 96892_at    | Psm1     | proteasome (prosome, macropain) subunit, alpha type 1            | 0.280359239  | 0.891333719 | Psm1     | 1.219881204 | 26440  |
| 26442  | 94841_at    | Psm5     | proteasome (prosome, macropain) subunit, alpha type 5            | 0.229191727  | 0.843301484 | Psm5     | 1.542059162 | 26442  |
| 26445  | 94219_at    | Psmb2    | proteasome (prosome, macropain) subunit, beta type 2             | 0.457201738  | 0.410937145 | Psmb2    | 1.586199577 | 26445  |
| 266690 | 97922_at    | Cyb5f4   | cytochrome b5 reductase 4                                        | 0.434906177  | 0.697100585 | Cyb5f4   | 1.075828948 | 266690 |
| 26754  | 95460_at    | Cops5    | COP9 (constitutive photomorphogenic) homolog, subunit 5 (        | 0.018818089  | 0.993475944 | Cops5    | 1.799521135 | 26754  |
| 268697 | 160159_at   | NA       | NA                                                               | 1.006816184  | NA          | Cnbn1    | 3.219249733 | 268697 |
| 26905  | 94252_at    | Eif2s3x  | eukaryotic translation initiation factor 2, subunit 3, structura | -0.268916392 | 0.885562762 | Eif2s3x  | 1.505532927 | 26905  |
| 26909  | 92244_at    | Exo1     | exonuclease 1                                                    | -0.008935729 | NA          | Exo1     | 2.097627235 | 26909  |
| 26943  | 100151_at   | Serinec3 | serine incorporator 3                                            | 0.062241041  | 0.967716366 | Serinec3 | 1.570733547 | 26943  |
| 269523 | 100710_at   | Vcp      | valosin containing protein                                       | -0.053568473 | 0.973497364 | Vcp      | 1.433706975 | 269523 |
| 269523 | 97666_r_at  | NA       | NA                                                               | -0.175570784 | NA          | Vcp      | 1.433706975 | 269523 |
| 269523 | 97665_i_at  | NA       | NA                                                               | -0.16716465  | NA          | Vcp      | 1.433706975 | 269523 |
| 269523 | 161550_r_at | Vcp      | valosin containing protein                                       | 0.105598244  | NA          | Vcp      | 1.433706975 | 269523 |
| 27041  | 103642_at   | G3bp1    | GTPase activating protein (SH3 domain) binding protein 1         | -0.656108814 | 0.29067275  | G3bp1    | 1.10907762  | 27041  |
| 27041  | 102944_at   | G3bp1    | GTPase activating protein (SH3 domain) binding protein 1         | -0.298188194 | NA          | G3bp1    | 1.10907762  | 27041  |
| 27053  | 95133_at    | Asns     | asparagine synthetase                                            | 0.265911077  | 0.728818272 | Asns     | 1.991624895 | 27053  |
| 27053  | 161221_f_at | Asns     | asparagine synthetase                                            | 0.132334246  | NA          | Asns     | 1.991624895 | 27053  |
| 27058  | 101579_at   | Srp9     | signal recognition particle 9                                    | -0.182973393 | 0.941382    | Srp9     | 1.077488466 | 27058  |
| 27058  | 101579_at   | Srp9     | signal recognition particle 9                                    | -0.182973393 | 0.941382    | Srp9     | 1.035993143 | 27058  |
| 27214  | 160687_r_at | Dbf4     | DBF4 homolog (S. cerevisiae)                                     | 0.08209952   | NA          | Dbf4     | 1.319666461 | 27214  |
| 27221  | 95527_at    | Chaf1a   | chromatin assembly factor 1, subunit A (p150)                    | 0.226842423  | 0.808982714 | Chaf1a   | 1.069978183 | 27221  |
| 27251  | 98932_at    | NA       | NA                                                               | 0.117346008  | NA          | Gins2    | 1.264923836 | 27251  |
| 27354  | 103805_at   | Nbn      | nibrin                                                           | -0.001259104 | NA          | Nbn      | 1.182650766 | 27354  |
| 27407  | 102010_at   | Abcf2    | ATP-binding cassette, sub-family F (GCN20), member 2             | 0.102658402  | NA          | Abcf2    | 1.271782706 | 27407  |
| 27407  | 93845_at    | Abcf2    | ATP-binding cassette, sub-family F (GCN20), member 2             | -0.069476458 | NA          | Abcf2    | 1.271782706 | 27407  |

|        |             |                     |                                                                                            |              |             |                     |              |        |
|--------|-------------|---------------------|--------------------------------------------------------------------------------------------|--------------|-------------|---------------------|--------------|--------|
| 27670  | 95697_at    | Eif5a               | eukaryotic translation initiation factor 5A                                                | -0.138637167 | NA          | Eif5a               | 1.387435929  | 27670  |
| 28030  | 160226_at   | Gfm1                | G elongation factor, mitochondrial 1                                                       | -0.011652228 | NA          | Gfm1                | 1.533804187  | 28030  |
| 28035  | 161242_f_at | Usp39               | ubiquitin specific peptidase 39                                                            | 0.038344639  | NA          | Usp39               | 1.72141448   | 28035  |
| 28035  | 96646_at    | Usp39               | ubiquitin specific peptidase 39                                                            | 0.027190312  | NA          | Usp39               | 1.72141448   | 28035  |
| 28036  | 161426_at   | Larp7               | La ribonucleoprotein domain family, member 7                                               | -0.066430143 | NA          | Larp7               | 1.074238082  | 28036  |
| 28036  | 98016_at    | Larp7               | La ribonucleoprotein domain family, member 7                                               | 0.109537547  | NA          | Larp7               | 1.074238082  | 28036  |
| 28036  | 100410_at   | Larp7               | La ribonucleoprotein domain family, member 7                                               | 0.245774937  | 0.813286604 | Larp7               | 1.074238082  | 28036  |
| 28114  | 94451_at    | Nsun2               | NOL1/NOP2/Sun domain family member 2                                                       | -0.493204933 | 0.366926176 | Nsun2               | 1.360243535  | 28114  |
| 28114  | 94450_at    | Nsun2               | NOL1/NOP2/Sun domain family member 2                                                       | -0.551328318 | 0.568775091 | Nsun2               | 1.360243535  | 28114  |
| 28114  | 161805_r_at | Nsun2               | NOL1/NOP2/Sun domain family member 2                                                       | -0.055380131 | NA          | Nsun2               | 1.360243535  | 28114  |
| 28114  | 94452_g_at  | Nsun2               | NOL1/NOP2/Sun domain family member 2                                                       | -1.014168598 | 0.281857146 | Nsun2               | 1.360243535  | 28114  |
| 28185  | 95432_f_at  | Tomm70a             | translocase of outer mitochondrial membrane 70 homolog A                                   | -0.60692593  | 0.754879921 | Tomm70a             | 1.737086904  | 28185  |
| 28185  | 95431_at    | Tomm70a             | translocase of outer mitochondrial membrane 70 homolog A                                   | 0.039916058  | NA          | Tomm70a             | 1.737086904  | 28185  |
| 29870  | 103270_at   | Gtse1               | G two S phase expressed protein 1                                                          | 0.29114708   | 0.67887747  | Gtse1               | 1.571354537  | 29870  |
| 29876  | 94255_g_at  | Clic4               | chloride intracellular channel 4 (mitochondrial)                                           | 0.812579933  | 0.552748747 | Clic4               | 1.784453923  | 29876  |
| 29876  | 94254_at    | Clic4               | chloride intracellular channel 4 (mitochondrial)                                           | 0.587773734  | 0.24742356  | Clic4               | 1.784453923  | 29876  |
| 29876  | 94256_at    | Clic4               | chloride intracellular channel 4 (mitochondrial)                                           | 0.85154665   | 0.175108671 | Clic4               | 1.784453923  | 29876  |
| 30954  | 97828_at    | Siva1               | SIVA1, apoptosis-inducing factor                                                           | 0.245456387  | 0.792496552 | Siva1               | 2.048902687  | 30954  |
| 319177 | 93889_f_at  | Histh2ba            | histone cluster 1, H2ba                                                                    | 0.201419477  | NA          | Histh2ba            | 1.578575813  | 319177 |
| 319178 | 101654_at   | Histh2bb            | histone cluster 1, H2bb                                                                    | -0.096346747 | 0.948147955 | Histh2bb            | 2.268257921  | 319178 |
| 319188 | 161394_f_at | Histh2bp            | histone cluster 1, H2bp                                                                    | 0.192247848  | NA          | Histh2bp            | 1.30583652   | 319188 |
| 319188 | 16219_r_at  | Histh2bp            | histone cluster 1, H2bp                                                                    | 0.148723003  | 0.933412549 | Histh2bp            | 1.30583652   | 319188 |
| 319188 | 93834_at    | Histh2bp            | histone cluster 1, H2bp                                                                    | 0.150202682  | 0.908037691 | Histh2bp            | 1.30583652   | 319188 |
| 319189 | 94638_at    | Histh2bbb           | histone cluster 2, H2bbb                                                                   | 0.056250315  | NA          | Histh2bbb           | 2.044963692  | 319189 |
| 320938 | 96674_at    | Tpox3               | transportin 3                                                                              | -0.078446297 | 0.955241998 | Tpox3               | 1.100520067  | 320938 |
| 353172 | 93270_at    | Gars                | glycyl-tRNA synthetase                                                                     | 0.490542181  | 0.73416326  | Gars                | 1.748074826  | 353172 |
| 433256 | 97456_at    | AcsL5               | acyl-CoA synthetase long-chain family member 5                                             | 0.257492685  | 0.844536943 | AcsL5               | 1.318860091  | 433256 |
| 50995  | 96701_at    | Uba2                | ubiquitin-like modifier activating enzyme 2                                                | -0.225445909 | 0.894733333 | Uba2                | 1.132070484  | 50995  |
| 51788  | 101954_at   | H2afz               | H2A histone family, member Z                                                               | 0.148689496  | 0.119419038 | H2afz               | 1.695302703  | 51788  |
| 51797  | 103341_at   | Ctps                | cytidine 5'-triphosphate synthase                                                          | -0.587526212 | 0.195658336 | Ctps                | 1.222644202  | 51797  |
| 51810  | 160316_at   | Al503316            | expressed sequence Al503316                                                                | -0.808298408 | 0.348221486 | Hnrmpu              | 1.215630551  | 51810  |
| 51810  | 93761_at    | Hnrmpu              | heterogeneous nuclear ribonucleoprotein U                                                  | 0.02752102   | NA          | Hnrmpu              | 1.215630551  | 51810  |
| 52014  | 94435_at    | Nus1                | nuclear undecaprenyl pyrophosphate synthase 1 homolog (S. cell division cycle associated 8 | -0.365012718 | 0.717319015 | Nus1                | 1.431183108  | 52014  |
| 52276  | 97295_at    | Cdca8               | cell division cycle associated 8                                                           | 0.639946126  | 0.267278287 | Cdca8               | 1.310652924  | 52276  |
| 52398  | 98778_at    | 11-Sep<br>septin 11 | septin 11                                                                                  | 0.135782683  | NA          | 11-Sep<br>septin 11 | 1.87291105   | 52398  |
| 52615  | 103746_at   | Suz12               | suppressor of zeste 12 homolog (Drosophila)                                                | 0.226239546  | NA          | Suz12               | 1.221047468  | 52615  |
| 52615  | 101662_at   | Suz12               | suppressor of zeste 12 homolog (Drosophila)                                                | 0.054398882  | 0.967716366 | Suz12               | 1.221047468  | 52615  |
| 52615  | 94044_at    | Suz12               | suppressor of zeste 12 homolog (Drosophila)                                                | -0.242340648 | 0.918592278 | Suz12               | 1.221047468  | 52615  |
| 52653  | 160395_at   | Nudcd2              | NudC domain containing 2                                                                   | -0.184372035 | 0.932281414 | Nudcd2              | 1.271703817  | 52653  |
| 52653  | 96932_at    | Nudcd2              | NudC domain containing 2                                                                   | -0.091009475 | NA          | Nudcd2              | 1.271703817  | 52653  |
| 53333  | 160653_at   | Tomm40              | translocase of outer mitochondrial membrane 40 homolog (y                                  | 0.000654524  | NA          | Tomm40              | 1.029546738  | 53333  |
| 53379  | 93118_at    | NA                  | NA                                                                                         | -0.713021618 | 0.648637306 | Hnrnpa2b1           | 1.184662717  | 53379  |
| 53379  | 93117_at    | NA                  | NA                                                                                         | -0.015754857 | 0.993536184 | Hnrnpa2b1           | 1.184662717  | 53379  |
| 53381  | 93495_at    | Prdx4               | peroxiredoxin 4                                                                            | 0.718339177  | 0.132636582 | Prdx4               | 1.795312595  | 53381  |
| 53382  | 160115_at   | Txn1l               | thioredoxin-like 1                                                                         | 0.265885191  | 0.751379765 | Txn1l               | 1.586647125  | 53382  |
| 53414  | 160227_s_at | Bysl                | bystin-like                                                                                | 0.020373755  | 0.986969008 | Bysl                | 1.139846714  | 53414  |
| 53414  | 96644_at    | Bysl                | bystin-like                                                                                | -0.038223134 | NA          | Bysl                | 1.139846714  | 53414  |
| 53416  | 160806_at   | Stk39               | serine/threonine kinase 39                                                                 | 0.258660683  | 0.749793945 | Stk39               | 1.859797224  | 53416  |
| 53600  | 95441_at    | Timm23              | translocase of inner mitochondrial membrane 23                                             | 0.254365465  | 0.834046819 | Timm23              | 1.468534267  | 53600  |
| 53605  | 98587_at    | Nap1l               | nucleosome assembly protein 1-like 1                                                       | 0.026701646  | 0.982632525 | Nap1l               | 1.176830407  | 53605  |
| 53605  | 98586_at    | Nap1l               | nucleosome assembly protein 1-like 1                                                       | -0.423519087 | 0.673061978 | Nap1l               | 1.176830407  | 53605  |
| 53872  | 161232_r_at | NA                  | NA                                                                                         | 0.057426045  | NA          | Caprin1             | 1.106657813  | 53872  |
| 53872  | 92611_at    | NA                  | NA                                                                                         | -0.449084576 | 0.799295066 | Caprin1             | 1.106657813  | 53872  |
| 54124  | 97468_at    | NA                  | NA                                                                                         | 1.11344572   | 0.078690024 | Cks1b               | 2.0522206403 | 54124  |
| 54167  | 98282_at    | Icos                | inducible T cell co-stimulator                                                             | 0.831150884  | 0.132636582 | Icos                | 1.734011787  | 54167  |
| 54208  | 160371_at   | Arl6ip1             | ADP-ribosylation factor-like 6 interacting protein 1                                       | 0.131295857  | 0.943019651 | Arl6ip1             | 1.033543581  | 54208  |
| 55932  | 103202_at   | Gbp3                | guanylate binding protein 3                                                                | 0.77015084   | 0.361369647 | Gbp3                | 1.148071836  | 55932  |
| 55989  | 92569_f_at  | Nop58               | NOP58 ribonucleoprotein                                                                    | -0.368740328 | 0.588211203 | Nop58               | 1.021815831  | 55989  |
| 56150  | 99632_at    | NA                  | NA                                                                                         | 1.233575994  | 0.300808594 | Mad2l1              | 1.952698573  | 56150  |
| 56200  | 94361_at    | Ddx21               | DEAD (Asp-Glu-Ala-Asp) box polypeptide 21                                                  | -0.396741225 | 0.49305025  | Ddx21               | 1.504335181  | 56200  |
| 56207  | 100511_at   | Uchl5               | ubiquitin carboxyl-terminal esterase L5                                                    | -0.222101531 | 0.891232036 | Uchl5               | 1.432487074  | 56207  |
| 56334  | 93817_at    | Tmed2               | transmembrane emp24 domain trafficking protein 2                                           | 0.210776987  | NA          | Tmed2               | 1.072273929  | 56334  |
| 56334  | 93818_g_at  | Tmed2               | transmembrane emp24 domain trafficking protein 2                                           | 0.50587442   | 0.541897575 | Tmed2               | 1.072273929  | 56334  |
| 56334  | 93819_at    | Tmed2               | transmembrane emp24 domain trafficking protein 2                                           | 0.277094109  | 0.838063932 | Tmed2               | 1.072273929  | 56334  |
| 56347  | 94837_at    | Eif3c               | eukaryotic translation initiation factor 3, subunit C                                      | 0.168557877  | 0.908037691 | Eif3c               | 1.877600961  | 56347  |
| 56351  | 94259_at    | NA                  | NA                                                                                         | -0.639104404 | 0.63580862  | Ptges3              | 1.029216362  | 56351  |
| 56403  | 94985_at    | Syncrip             | synaptotagmin binding, cytoplasmic RNA interacting protein                                 | 0.014952716  | 0.992515226 | Syncrip             | 1.438856587  | 56403  |
| 56403  | 95606_at    | Syncrip             | synaptotagmin binding, cytoplasmic RNA interacting protein                                 | 0.317615663  | 0.813286604 | Syncrip             | 1.438856587  | 56403  |
| 56419  | 95628_at    | Diap3               | diaphanous homolog 3 (Drosophila)                                                          | 0.24477739   | NA          | Diap3               | 1.82925822   | 56419  |

|       |             |           |                                                                       |               |             |           |             |       |
|-------|-------------|-----------|-----------------------------------------------------------------------|---------------|-------------|-----------|-------------|-------|
| 56421 | 97833_at    | Pfkfb     | phosphofructokinase, platelet                                         | 1.058405316   | 0.112273147 | Pfkfb     | 1.579433105 | 56421 |
| 56421 | 97834_g_at  | Pfkfb     | phosphofructokinase, platelet                                         | 1.249099967   | 0.258294165 | Pfkfb     | 1.579433105 | 56421 |
| 56428 | 160262_at   | Mtch2     | mitochondrial carrier homolog 2 (C. elegans)                          | -0.277828718  | 0.925172215 | Mtch2     | 1.077938362 | 56428 |
| 56452 | 95712_at    | Orc6      | origin recognition complex, subunit 6                                 | 0.12448766    | NA          | Orc6      | 2.014663006 | 56452 |
| 56459 | 95703_at    | Sae1      | SUMO1 activating enzyme subunit 1                                     | -0.0893854228 | 0.96444129  | Sae1      | 1.697269295 | 56459 |
| 56462 | 95689_at    | Mtch1     | mitochondrial carrier homolog 1 (C. elegans)                          | 0.166420023   | NA          | Mtch1     | 1.09256987  | 56462 |
| 56530 | 100039_at   | Cnpy2     | canopy 2 homolog (zebrafish)                                          | 0.023437989   | 0.982378186 | Cnpy2     | 1.029322121 | 56530 |
| 56702 | 99803_at    | Hist1hb   | histone cluster 1, H1b                                                | 0.103356181   | 0.953195288 | Hist1hb   | 1.913490472 | 56702 |
| 56752 | 96243_f_at  | Aldh9a1   | aldehyde dehydrogenase 9, subfamily A1                                | -0.075227391  | 0.976021429 | Aldh9a1   | 1.027373243 | 56752 |
| 56758 | 96354_at    | Mbnl1     | muscleblind-like 1 (Drosophila)                                       | 0.100629111   | 0.949779251 | Mbnl1     | 1.185086406 | 56758 |
| 57296 | 98522_at    | PsmD8     | proteasome (prosome, macropain) 26S subunit, non-ATPase               | 0.582423339   | 0.204996004 | PsmD8     | 1.006981825 | 57296 |
| 57436 | 93011_at    | Gabaraph1 | gamma-aminobutyric acid (GABA) A receptor-associated protein          | 0.658617852   | 0.126430741 | Gabaraph1 | 2.01680464  | 57436 |
| 57441 | 160069_at   | Gmnn      | geminin                                                               | 0.601134065   | 0.272059965 | Gmnn      | 2.349643513 | 57441 |
| 57750 | 94674_at    | D1Wsu158e | DNA segment, Chr 1, Wayne State University 158, expressed             | -0.242429442  | 0.756552873 | Wdr12     | 1.017558399 | 57750 |
| 57815 | 94387_at    | Spata5    | spermatogenesis associated 5                                          | 0.002734345   | 0.999646575 | Spata5    | 1.187084867 | 57815 |
| 58523 | 95513_at    | Elp2      | elongator acetyltransferase complex subunit 2                         | -0.291158576  | 0.723137298 | Elp2      | 1.128414223 | 58523 |
| 59008 | 95100_at    | Anapc5    | anaphase-promoting complex subunit 5                                  | -0.428495835  | 0.575651991 | Anapc5    | 1.47483713  | 59008 |
| 59024 | 103277_s_at | NA        | NA                                                                    | -0.229226495  | 0.850157869 | Med12     | 1.182064414 | 59024 |
| 59027 | 94461_at    | Nampt     | nicotinamide phosphoribosyltransferase                                | -0.426943595  | 0.605588177 | Nampt     | 1.036994897 | 59027 |
| 59035 | 99169_at    | Carm1     | coactivator-associated arginine methyltransferase 1                   | -0.102421346  | 0.941382    | Carm1     | 1.015668576 | 59035 |
| 60365 | 97254_at    | Rbm8a     | RNA binding motif protein 8a                                          | -0.068206565  | 0.967251179 | Rbm8a     | 1.063465157 | 60365 |
| 60406 | 160068_at   | Sap30     | sin3 associated polypeptide                                           | 0.399360983   | NA          | Sap30     | 2.310907742 | 60406 |
| 60409 | 160361_at   | Trappc4   | trafficking protein particle complex 4                                | 0.164599353   | 0.908037691 | Trappc4   | 1.05375208  | 60409 |
| 60411 | 98400_at    | Cenpk     | centromere protein K                                                  | 0.450204196   | NA          | Cenpk     | 1.736220984 | 60411 |
| 60530 | 96569_at    | Figl1     | figetin-like 1                                                        | 0.011364808   | NA          | Figl1     | 2.822829914 | 60530 |
| 60530 | 160648_at   | Figl1     | figetin-like 1                                                        | 1.003647624   | 0.106887304 | Figl1     | 2.822829914 | 60530 |
| 60595 | 96343_at    | Actn4     | actinin alpha 4                                                       | 0.319620564   | 0.551450752 | Actn4     | 1.05741701  | 60595 |
| 64540 | 97473_at    | Tspan4    | tetraspanin 4                                                         | -0.0223992    | NA          | Tspan4    | 1.189606092 | 64540 |
| 64655 | 160621_at   | Mrps22    | mitochondrial ribosomal protein S22                                   | 0.071954522   | NA          | Mrps22    | 1.263422935 | 64655 |
| 65105 | 95136_at    | Arl6ip4   | ADP-ribosylation factor-like 6 interacting protein 4                  | 0.245262447   | NA          | Arl6ip4   | 1.305159565 | 65105 |
| 65961 | 103876_at   | Utp3      | UTP3, small subunit (SSU) processome component, homolog               | -0.007962206  | NA          | Utp3      | 1.851030856 | 65961 |
| 65972 | 97444_at    | Ifi30     | interferon gamma inducible protein 30                                 | 0.071540437   | NA          | Ifi30     | 1.048458747 | 65972 |
| 66054 | 160349_at   | Cndp2     | CNDP dipeptidase 2 (metallopeptidase M20 family)                      | -0.134549091  | NA          | Cndp2     | 1.249522745 | 66054 |
| 66092 | 160530_at   | Ghitm     | growth hormone inducible transmembrane protein                        | 0.009269451   | 0.999145614 | Ghitm     | 1.156083301 | 66092 |
| 66092 | 100592_at   | Ghitm     | growth hormone inducible transmembrane protein                        | -0.13017143   | 0.933412549 | Ghitm     | 1.156083301 | 66092 |
| 66140 | 160987_r_at | Skaz2     | spindle and kinetochore associated complex subunit 2                  | 0.06881274    | NA          | Skaz2     | 1.03924568  | 66140 |
| 66152 | 94078_at    | NA        | NA                                                                    | 0.447967489   | 0.511286857 | Uqer10    | 1.210297613 | 66152 |
| 66154 | 96353_at    | Tmem14c   | transmembrane protein 14C                                             | 0.127614516   | 0.949899324 | Tmem14c   | 1.179871739 | 66154 |
| 66161 | 160154_at   | Pop4      | processing of precursor 4, ribonuclease P/MRP family, (S. cerevisiae) | 0.02870272    | 0.980325583 | Pop4      | 1.652216758 | 66161 |
| 66218 | 100079_at   | Ndufb9    | NADH dehydrogenase (ubiquinone) 1 beta subcomplex, 9                  | 0.586752478   | 0.308532112 | Ndufb9    | 1.187087269 | 66218 |
| 66229 | 98138_at    | Rpl7l1    | ribosomal protein L7-like 1                                           | -0.432011285  | 0.366926176 | Rpl7l1    | 1.263428833 | 66229 |
| 66234 | 160388_at   | Sc4mol    | sterol-C4-methyl oxidase-like                                         | -0.392810019  | 0.778413027 | Msmo1     | 1.173001374 | 66234 |
| 66235 | 93358_at    | Eif1ax    | eukaryotic translation initiation factor 1A, X-linked                 | -0.079895474  | 0.967716366 | Eif1ax    | 1.083364079 | 66235 |
| 66235 | 160111_at   | Eif1ax    | eukaryotic translation initiation factor 1A, X-linked                 | -0.492816783  | 0.748974726 | Eif1ax    | 1.083364079 | 66235 |
| 66249 | 97237_at    | Pnoi1     | partner of NOB1 homolog (S. cerevisiae)                               | -0.50923786   | 0.802105989 | Pnoi1     | 1.156984541 | 66249 |
| 66256 | 101061_at   | Ssr2      | signal sequence receptor, beta                                        | 0.249330537   | 0.866637141 | Ssr2      | 1.107347984 | 66256 |
| 66258 | 94909_at    | Mrps17    | mitochondrial ribosomal protein S17                                   | -0.00970307   | NA          | Mrps17    | 1.258825209 | 66258 |
| 66413 | 160239_at   | PsmD6     | proteasome (prosome, macropain) 26S subunit, non-ATPase               | -0.296527166  | 0.711757607 | PsmD6     | 1.079485418 | 66413 |
| 66427 | 96878_at    | NA        | NA                                                                    | 0.425711665   | 0.609295873 | Cyb5b     | 1.226448689 | 66427 |
| 66427 | 103619_at   | NA        | NA                                                                    | -0.360789502  | 0.568775091 | Cyb5b     | 1.226448689 | 66427 |
| 66445 | 95072_at    | Cyc1      | cytochrome c-1                                                        | -0.340820216  | 0.67887747  | Cyc1      | 1.154682637 | 66445 |
| 66445 | 162469_r_at | Cyc1      | cytochrome c-1                                                        | -0.148974899  | 0.908037691 | Cyc1      | 1.154682637 | 66445 |
| 66471 | 97556_at    | Anp32e    | acidic (leucine-rich) nuclear phosphoprotein 32 family, member 1      | -0.02172943   | 0.987709904 | Anp32e    | 1.340498501 | 66471 |
| 66471 | 97345_at    | Anp32e    | acidic (leucine-rich) nuclear phosphoprotein 32 family, member 1      | 0.168334959   | NA          | Anp32e    | 1.340498501 | 66471 |
| 66494 | 93774_at    | NA        | NA                                                                    | 0.82809963    | 0.067273329 | Prelid1   | 1.61066905  | 66494 |
| 66537 | 94014_at    | Pomp      | proteasome maturation protein                                         | 0.463117775   | 0.416133096 | Pomp      | 1.325427076 | 66537 |
| 66578 | 160784_r_at | Mist18a   | MIS18 kinetochore protein homolog A (S. pombe)                        | -0.288610468  | 0.67887747  | Mist18a   | 1.624166509 | 66578 |
| 66585 | 95677_at    | Snrnp40   | small nuclear ribonucleoprotein 40 (U5)                               | -0.089672216  | 0.953124546 | Snrnp40   | 1.065892097 | 66585 |
| 66592 | 96289_at    | Stoml2    | stomatin (Ephb2)-like 2                                               | 0.188869683   | 0.883750377 | Stoml2    | 1.027675724 | 66592 |
| 66624 | 96855_at    | Spes2     | signal peptidase complex subunit 2 homolog (S. cerevisiae)            | -0.392920433  | 0.67887747  | Spes2     | 1.138178812 | 66624 |
| 66868 | 94548_at    | Mfsd1     | major facilitator superfamily domain containing 1                     | 0.146960023   | 0.958487806 | Mfsd1     | 1.083090505 | 66868 |
| 66868 | 94549_at    | Mfsd1     | major facilitator superfamily domain containing 1                     | 0.248818584   | 0.837268314 | Mfsd1     | 1.083090505 | 66868 |
| 66870 | 96539_at    | Serbp1    | serpine1 mRNA binding protein 1                                       | -0.594172342  | 0.340198522 | Serbp1    | 1.130722934 | 66870 |
| 66890 | 161472_r_at | Lman2     | lectin, mannose-binding 2                                             | 0.151894224   | 0.929987845 | Lman2     | 1.058550347 | 66890 |
| 66890 | 93993_at    | Lman2     | lectin, mannose-binding 2                                             | 0.479480179   | 0.306122995 | Lman2     | 1.058550347 | 66890 |
| 66913 | 162201_r_at | Kdelr2    | KDEL (Lys-Asp-Glu-Leu) endoplasmic reticulum protein ret              | 0.095409751   | NA          | Kdelr2    | 1.606462289 | 66913 |
| 66913 | 101922_at   | Kdelr2    | KDEL (Lys-Asp-Glu-Leu) endoplasmic reticulum protein ret              | 0.098131836   | NA          | Kdelr2    | 1.606462289 | 66913 |
| 66923 | 98894_at    | Phrm1     | polybromo 1                                                           | -0.28778112   | 0.847556094 | Phrm1     | 1.055327391 | 66923 |
| 66923 | 98893_at    | Phrm1     | polybromo 1                                                           | 0.263131911   | 0.937706093 | Phrm1     | 1.055327391 | 66923 |

|       |             |             |                                                             |              |    |               |             |       |
|-------|-------------|-------------|-------------------------------------------------------------|--------------|----|---------------|-------------|-------|
| 66923 | 104218_s_at | Pbrm1       | polybromo 1                                                 | -0.081261532 | NA | Pbrm1         | 1.055327391 | 66923 |
| 66923 | 92703_at    | Pbrm1       | polybromo 1                                                 | 0.071532584  |    | Pbrm1         | 1.055327391 | 66923 |
| 66925 | 92574_at    | Sdhf        | succinate dehydrogenase complex, subunit D, integral memb   | 0.110071257  |    | Sdhf          | 1.587302856 | 66925 |
| 66929 | 97364_at    | Asf1b       | ASF1 anti-silencing function 1 homolog B (S. cerevisiae)    | 0.496379563  |    | Asf1b         | 3.024155101 | 66929 |
| 66953 | 95063_at    | Cdca7       | cell division cycle associated 7                            | 0.210842192  |    | Cdca7         | 1.589382429 | 66953 |
| 66964 | 92279_at    | Golttb      | golgi transport 1 homolog B (S. cerevisiae)                 | 0.217843867  | NA | Golttb        | 1.037836344 | 66964 |
| 66997 | 93971_f_at  | Psm12       | proteasome (prosome, macropain) 26S subunit, non-ATPase     | -0.095279775 |    | Psm12         | 1.566815494 | 66997 |
| 67005 | 104303_i_at | Polr3k      | polymerase (RNA) III (DNA directed) polypeptide K           | 0.37801963   |    | Polr3k        | 1.186079868 | 67005 |
| 67005 | 104304_r_at | Polr3k      | polymerase (RNA) III (DNA directed) polypeptide K           | 0.482856485  |    | Polr3k        | 1.186079868 | 67005 |
| 67037 | 98552_at    | Pmf1        | polyamine-modulated factor 1                                | 0.214196744  |    | Pmf1          | 1.738320057 | 67037 |
| 67039 | 97816_at    | Rbm25       | RNA binding motif protein 25                                | -0.617307357 |    | Rbm25         | 1.044676523 | 67039 |
| 67052 | 161017_at   | Ndc80       | NDC80 homolog, kinetochore complex component (S. cerevis    | 0.055849086  | NA | Ndc80         | 2.379845218 | 67052 |
| 67153 | 97164_at    | Rnaseh2b    | ribonuclease H2, subunit B                                  | 0.710983418  |    | Rnaseh2b      | 1.422455676 | 67153 |
| 67154 | 93802_at    | Mtdh        | metadherin                                                  | 0.083665835  | NA | Mtdh          | 1.044599679 | 67154 |
| 67154 | 162057_f_at | Mtdh        | metadherin                                                  | 0.184051763  | NA | Mtdh          | 1.044599679 | 67154 |
| 67166 | 95435_at    | Arl8b       | ADP-ribosylation factor-like 8B                             | -0.605671294 |    | Arl8b         | 1.435207719 | 67166 |
| 67166 | 98490_at    | Arl8b       | ADP-ribosylation factor-like 8B                             | -0.169361525 | NA | Arl8b         | 1.435207719 | 67166 |
| 67166 | 98491_at    | Arl8b       | ADP-ribosylation factor-like 8B                             | -0.145234951 | NA | Arl8b         | 1.435207719 | 67166 |
| 67196 | 100955_at   | Ube2t       | ubiquitin-conjugating enzyme E2T (putative)                 | 0.544433578  | NA | Ube2t         | 1.494144093 | 67196 |
| 67203 | 94910_at    | Nde1        | nuclear distribution gene E homolog 1 (A nidulans)          | 0.303134331  |    | Nde1          | 1.491874557 | 67203 |
| 67212 | 98109_at    | Mrpl55      | mitochondrial ribosomal protein L55                         | -0.014291578 | NA | Mrpl55        | 1.16671699  | 67212 |
| 67300 | 160252_at   | Cltc        | clathrin, heavy polypeptide (Hc)                            | 0.1260975    |    | Cltc          | 1.305672835 | 67300 |
| 67308 | 104567_at   | Mrpl46      | mitochondrial ribosomal protein L46                         | -0.053673264 | NA | Mrpl46        | 1.042870026 | 67308 |
| 67308 | 162436_at   | Mrpl46      | mitochondrial ribosomal protein L46                         | -0.014400463 |    | Mrpl46        | 1.042870026 | 67308 |
| 67437 | 104249_g_at | Ssr3        | signal sequence receptor, gamma                             | 0.367274948  |    | Ssr3          | 1.243234357 | 67437 |
| 67437 | 96007_at    | Ssr3        | signal sequence receptor, gamma                             | 0.014016192  |    | Ssr3          | 1.243234357 | 67437 |
| 67437 | 104248_at   | Ssr3        | signal sequence receptor, gamma                             | 0.384076385  |    | Ssr3          | 1.243234357 | 67437 |
| 67458 | 160184_at   | Ergic1      | endoplasmic reticulum-golgi intermediate compartment (ER    | -0.194606579 | NA | Ergic1        | 1.020907207 | 67458 |
| 67459 | 95357_at    | Nvl         | nuclear VCP-like                                            | 0.071466182  | NA | Nvl           | 1.095956527 | 67459 |
| 67459 | 96565_at    | NA          | NA                                                          | 0.092857682  |    | Nvl           | 1.095956527 | 67459 |
| 67459 | 101366_f_at | Nvl         | nuclear VCP-like                                            | -0.011996784 | NA | Nvl           | 1.095956527 | 67459 |
| 67511 | 100074_at   | Tmed9       | transmembrane emp24 protein transport domain containing     | 0.008949706  |    | Tmed9         | 1.002222326 | 67511 |
| 67628 | 96891_at    | Anp32b      | acidic (leucine-rich) nuclear phosphoprotein 32 family, mem | 0.119851715  |    | Anp32b        | 1.322036502 | 67628 |
| 67673 | 160402_at   | Teeb2       | transcription elongation factor B (SIII), polypeptide 2     | 0.791265721  |    | Teeb2         | 1.266840225 | 67673 |
| 67673 | 162470_at   | NA          | NA                                                          | 0.21275985   |    | Teeb2         | 1.266840225 | 67673 |
| 67675 | 95114_s_at  | Cuta        | cutA divalent cation tolerance homolog (E. coli)            | 0.296247182  |    | Cuta          | 1.110855667 | 67675 |
| 67675 | 95113_at    | Cuta        | cutA divalent cation tolerance homolog (E. coli)            | 0.085830421  |    | Cuta          | 1.110855667 | 67675 |
| 67781 | 93823_at    | Ilf2        | interleukin enhancer binding factor 2                       | -0.491456061 |    | Ilf2          | 1.023726357 | 67781 |
| 67838 | 98572_at    | Dnajb11     | DnaJ (Hsp40) homolog, subfamily B, member 11                | 0.481304589  |    | Dnajb11       | 1.322219506 | 67838 |
| 67849 | 161332_f_at | Cdca5       | cell division cycle associated 5                            | 0.680031535  |    | Cdca5         | 1.662977885 | 67849 |
| 67849 | 160699_at   | Cdca5       | cell division cycle associated 5                            | 0.323716359  | NA | Cdca5         | 1.662977885 | 67849 |
| 67864 | 160475_at   | Yipf4       | Yip1 domain family, member 4                                | 0.121459116  |    | Yipf4         | 1.049947192 | 67864 |
| 67895 | 160314_at   | Ppa1        | pyrophosphatase (inorganic) 1                               | -0.042683834 | NA | Ppa1          | 1.588049872 | 67895 |
| 67936 | 100917_at   | Wdr55       | WD repeat domain 55                                         | 0.073592701  |    | Wdr55         | 1.05539378  | 67936 |
| 67941 | 160389_r_at | Rps27l      | ribosomal protein S27-like                                  | 0.30852774   |    | Rps27l        | 1.154243365 | 67941 |
| 67949 | 93342_at    | Mki67ip     | Mki67 (FHA domain) interacting nucleolar phosphoprotein     | -0.676985096 |    | Nifk          | 1.182243648 | 67949 |
| 67996 | 160182_at   | Srsf6       | serine/arginine-rich splicing factor 6                      | -0.996412879 |    | Srsf6         | 1.157768247 | 67996 |
| 68024 | 93833_s_at  | NA          | NA                                                          | 0.276734633  |    | Histh2bc      | 1.702771027 | 68024 |
| 68026 | 161974_r_at | 2810417H13R | RIKEN cDNA 2810417H13 gene                                  | 0.142451416  | NA | 2810417H13Rik | 3.573239174 | 68026 |
| 68026 | 93952_r_at  | 2810417H13R | RIKEN cDNA 2810417H13 gene                                  | 0.303796015  | NA | 2810417H13Rik | 3.573239174 | 68026 |
| 68026 | 100116_at   | 2810417H13R | RIKEN cDNA 2810417H13 gene                                  | 1.462257487  |    | 2810417H13Rik | 3.573239174 | 68026 |
| 68092 | 94509_at    | Ncbp2       | nuclear cap binding protein subunit 2                       | 0.177133718  |    | Ncbp2         | 1.077105113 | 68092 |
| 68197 | 93359_at    | Ndufc2      | NADH dehydrogenase (ubiquinone) 1, subcomplex unknown       | 0.021113703  | NA | Ndufc2        | 1.07607311  | 68197 |
| 68251 | 93992_at    | Babam1      | BRISC and BRCA1 A complex member 1                          | 0.144676804  |    | Babam1        | 1.30229523  | 68251 |
| 68275 | 95427_at    | Rpa1        | replication protein A1                                      | -0.156199583 |    | Rpa1          | 1.0671063   | 68275 |
| 68375 | 93531_at    | Ndufa8      | NADH dehydrogenase (ubiquinone) 1 alpha subcomplex, 8       | 0.278251957  | NA | Ndufa8        | 1.225309138 | 68375 |
| 68441 | 94257_at    | Rraga       | Ras-related GTP binding A                                   | -0.191038335 |    | Rraga         | 1.352661964 | 68441 |
| 68465 | 104605_at   | Adipor2     | adiponectin receptor 2                                      | -0.269917967 |    | Adipor2       | 1.135332176 | 68465 |
| 68612 | 161137_r_at | Ube2c       | ubiquitin-conjugating enzyme E2C                            | -0.033489398 | NA | Ube2c         | 2.930769721 | 68612 |
| 68653 | 95690_at    | Samm50      | sorting and assembly machinery component 50 homolog (S. c   | -0.252438021 |    | Samm50        | 1.104214886 | 68653 |
| 68693 | 104609_at   | Hnrnpul2    | heterogeneous nuclear ribonucleoprotein U-like 2            | 0.270240725  |    | Hnrnpul2      | 1.182588848 | 68693 |
| 68693 | 104296_at   | Hnrnpul2    | heterogeneous nuclear ribonucleoprotein U-like 2            | -0.012755203 |    | Hnrnpul2      | 1.182588848 | 68693 |
| 68713 | 160254_at   | Ifitm1      | interferon induced transmembrane protein 1                  | 0.135859921  | NA | Ifitm1        | 1.049895115 | 68713 |
| 68743 | 96784_at    | Anln        | anillin, actin binding protein                              | 0.761992486  |    | Anln          | 2.033360541 | 68743 |
| 68926 | 104715_at   | Ubap2       | ubiquitin-associated protein 2                              | -0.067694518 | NA | Ubap2         | 1.281903835 | 68926 |
| 68981 | 101506_at   | Snrpa1      | small nuclear ribonucleoprotein polypeptide A'              | -0.311104201 |    | Snrpa1        | 1.246426416 | 68981 |
| 69071 | 95137_at    | Tmem97      | transmembrane protein 97                                    | 0.383202997  |    | Tmem97        | 1.699793701 | 69071 |
| 69104 | 99604_at    | 5-Mar       | membrane-associated ring finger (C3HC4) 5                   | -0.36384367  |    | 5-Mar         | 1.405126864 | 69104 |
| 69178 | 93598_at    | Snx5        | sorting nexin 5                                             | 0.465420354  |    | Snx5          | 1.340940563 | 69178 |



|       |             |            |                                                                 |              |             |           |             |       |
|-------|-------------|------------|-----------------------------------------------------------------|--------------|-------------|-----------|-------------|-------|
| 69178 | 93597_at    | Snx5       | sorting nexin 5                                                 | -0.019687949 | NA          | Snx5      | 1.340940563 | 69178 |
| 69227 | 97292_at    | Selt       | selenoprotein T                                                 | -0.598360415 | 0.630389729 | Selt      | 1.025113253 | 69227 |
| 69263 | 160072_at   | Rfc3       | replication factor C (activator 1) 3                            | 0.110787999  | NA          | Rfc3      | 1.315499966 | 69263 |
| 69666 | 104756_at   | Psmg4      | proteasome (prosome, macropain) assembly chaperone 4            | -0.031899664 | NA          | Psmg4     | 1.221571555 | 69666 |
| 69716 | 101372_at   | Trip13     | thyroid hormone receptor interactor 13                          | 0.273429455  | 0.756552873 | Trip13    | 2.119111532 | 69716 |
| 69882 | 96045_at    | Vwa9       | von Willebrand factor A domain containing 9                     | -0.124717085 | NA          | Vwa9      | 1.220220591 | 69882 |
| 70021 | 96885_at    | Nt5dc2     | 5'-nucleotidase domain containing 2                             | -0.219922264 | 0.810921469 | Nt5dc2    | 1.768987501 | 70021 |
| 70024 | 103553_at   | Mcm10      | minichromosome maintenance deficient 10 (S. cerevisiae)         | 0.126277369  | NA          | Mcm10     | 1.786017075 | 70024 |
| 70208 | 95616_at    | Med23      | mediator complex subunit 23                                     | -0.281179112 | 0.916740728 | Med23     | 1.08506023  | 70208 |
| 70223 | 95070_at    | Nars       | asparaginyl-tRNA synthetase                                     | -0.013065743 | 0.998186991 | Nars      | 1.322996933 | 70223 |
| 70239 | 104561_at   | Gtf3c5     | general transcription factor IIIC, polypeptide 5                | 0.168610531  | NA          | Gtf3c5    | 1.102880558 | 70239 |
| 70247 | 95483_at    | Psm1       | proteasome (prosome, macropain) 26S subunit, non-ATPase         | 0.188931819  | 0.876016094 | Psm1      | 1.298652049 | 70247 |
| 70572 | 161757_f_at | Ip05       | importin 5                                                      | 0.050107489  | NA          | Ip05      | 1.508999793 | 70572 |
| 70572 | 93070_at    | Ip05       | importin 5                                                      | -0.24741027  | 0.940051812 | Ip05      | 1.508999793 | 70572 |
| 70769 | 95735_at    | Nolc1      | nucleolar and coiled-body phosphoprotein 1                      | -0.388309388 | 0.410937145 | Nolc1     | 1.37922431  | 70769 |
| 71207 | 160188_at   | Nudt4      | nudix (nucleoside diphosphate linked moiety X)-type motif       | 0.523378763  | 0.418072109 | Nudt4     | 1.667368385 | 71207 |
| 71207 | 160189_at   | Nudt4      | nudix (nucleoside diphosphate linked moiety X)-type motif       | 0.34254215   | 0.52868417  | Nudt4     | 1.667368385 | 71207 |
| 71514 | 99620_at    | Sfpq       | splicing factor proline/ glutamine rich (polypyrimidine tract   | 0.147079289  | 0.958912883 | Sfpq      | 1.200888112 | 71514 |
| 71514 | 99621_s_at  | Sfpq       | splicing factor proline/ glutamine rich (polypyrimidine tract   | -0.439790714 | 0.511867765 | Sfpq      | 1.200888112 | 71514 |
| 71514 | 102144_f_at | Sfpq       | splicing factor proline/ glutamine rich (polypyrimidine tract   | 0.409171806  | NA          | Sfpq      | 1.200888112 | 71514 |
| 71514 | 97161_at    | Sfpq       | splicing factor proline/ glutamine rich (polypyrimidine tract   | -0.768920472 | 0.204996004 | Sfpq      | 1.200888112 | 71514 |
| 71514 | 161579_r_at | Sfpq       | splicing factor proline/ glutamine rich (polypyrimidine tract   | 0.138344806  | NA          | Sfpq      | 1.200888112 | 71514 |
| 71521 | 102982_at   | B230308N11 | RKKN cDNA B230308N11 gene                                       | -0.54518243  | 0.451972264 | Pds5a     | 1.64167404  | 71521 |
| 71819 | 96168_at    | Kif23      | kinesin family member 23                                        | 0.035700245  | 0.981913032 | Kif23     | 1.663751575 | 71819 |
| 71853 | 94209_g_at  | Pdia6      | protein disulfide isomerase associated 6                        | 0.075334867  | 0.967251179 | Pdia6     | 1.249428571 | 71853 |
| 71853 | 94207_at    | Pdia6      | protein disulfide isomerase associated 6                        | -0.053991907 | 0.970827248 | Pdia6     | 1.249428571 | 71853 |
| 71853 | 94208_at    | Pdia6      | protein disulfide isomerase associated 6                        | 0.205906589  | NA          | Pdia6     | 1.249428571 | 71853 |
| 71978 | 98916_at    | Ppp2r2a    | protein phosphatase 2 (formerly 2A), regulatory subunit B (I    | -0.031122416 | NA          | Ppp2r2a   | 1.598821199 | 71978 |
| 72151 | 95612_at    | Rfc5       | replication factor C (activator 1) 5                            | 0.323291546  | 0.599999639 | Rfc5      | 1.330818931 | 72151 |
| 72151 | 104001_at   | Rfc5       | replication factor C (activator 1) 5                            | 0.014161513  | NA          | Rfc5      | 1.330818931 | 72151 |
| 72162 | 95944_at    | Dhx36      | DEAH (Asp-Glu-Ala-His) box polypeptide 36                       | -0.383055217 | 0.889545776 | Dhx36     | 1.100897896 | 72162 |
| 72391 | 94971_at    | Cdkn3      | cyclin-dependent kinase inhibitor 3                             | 0.593443968  | 0.204996004 | Cdkn3     | 4.0010733   | 72391 |
| 72415 | 103928_at   | Sgoli      | shugoshin-like 1 (S. pombe)                                     | 0.170827565  | NA          | Sgoli     | 2.755157521 | 72415 |
| 72415 | 161676_at   | Sgoli      | shugoshin-like 1 (S. pombe)                                     | 0.13852881   | 0.92948193  | Sgoli     | 2.755157521 | 72415 |
| 72612 | 94360_at    | 2700029M09 | RKKN cDNA 2700029M09 gene                                       | 0.451845646  | 0.678228652 | Hpfi1     | 1.0520712   | 72612 |
| 72655 | 104089_at   | Snhg5      | small nucleolar RNA host gene 5                                 | -1.533318262 | 0.113207294 | Snhg5     | 1.301714627 | 72655 |
| 72776 | 96579_at    | Sass6      | spindle assembly 6 homolog (C. elegans)                         | -0.038567841 | NA          | Sass6     | 1.346361785 | 72776 |
| 73158 | 94260_at    | Larp1      | La ribonucleoprotein domain family, member 1                    | -0.42285915  | 0.424388731 | Larp1     | 1.58132159  | 73158 |
| 73666 | 99490_at    | Thoc3      | THO complex 3                                                   | -0.188113849 | 0.868616586 | Thoc3     | 1.687224618 | 73666 |
| 73945 | 94922_i_at  | Otud4      | OTU domain containing 4                                         | -0.241098977 | 0.907781441 | Otud4     | 1.068907165 | 73945 |
| 73945 | 94923_f_at  | Otud4      | OTU domain containing 4                                         | -0.614241294 | 0.579063751 | Otud4     | 1.068907165 | 73945 |
| 73945 | 160728_r_at | Otud4      | OTU domain containing 4                                         | -0.000427466 | NA          | Otud4     | 1.068907165 | 73945 |
| 74142 | 160328_at   | Lonp1      | lon peptidase 1, mitochondrial                                  | -0.327730268 | 0.629403103 | Lonp1     | 1.68764476  | 74142 |
| 74142 | 92684_at    | Lonp1      | lon peptidase 1, mitochondrial                                  | 0.036664936  | 0.976340772 | Lonp1     | 1.68764476  | 74142 |
| 74203 | 101230_at   | Eif4enif1  | eukaryotic translation initiation factor 4E nuclear import fact | 0.0484225    | NA          | Eif4enif1 | 1.182517196 | 74203 |
| 74617 | 98042_at    | Scepi1     | serine carboxypeptidase 1                                       | 0.30039402   | NA          | Scepi1    | 1.624184355 | 74617 |
| 74754 | 160369_at   | Dherc24    | 24-dehydrocholesterol reductase                                 | -0.016712271 | NA          | Dherc24   | 2.03203467  | 74754 |
| 74838 | 103791_at   | Naa15      | N(alpha)-acetyltransferase 15, NatA auxilliary subunit          | 0.015973161  | NA          | Naa15     | 1.010575868 | 74838 |
| 74838 | 96152_at    | Naa15      | N(alpha)-acetyltransferase 15, NatA auxilliary subunit          | 0.018345848  | 0.986969008 | Naa15     | 1.010575868 | 74838 |
| 74838 | 93246_at    | Naa15      | N(alpha)-acetyltransferase 15, NatA auxilliary subunit          | -0.303951533 | 0.819031499 | Naa15     | 1.010575868 | 74838 |
| 74841 | 102776_at   | Usp38      | ubiquitin specific peptidase 38                                 | -0.246780464 | 0.894733333 | Usp38     | 1.22021854  | 74841 |
| 74841 | 160605_s_at | Usp38      | ubiquitin specific peptidase 38                                 | -0.25656009  | 0.835517807 | Usp38     | 1.22021854  | 74841 |
| 75062 | 96029_at    | Sf3a3      | splicing factor 3a, subunit 3                                   | -0.109991405 | 0.950433011 | Sf3a3     | 1.177712532 | 75062 |
| 75234 | 103563_at   | Rnf19b     | ring finger protein 19B                                         | 0.307802158  | 0.58173751  | Rnf19b    | 1.564537935 | 75234 |
| 75423 | 92294_at    | Arf5a      | ADP-ribosylation factor-like 5A                                 | 0.275677951  | 0.734748217 | Arf5a     | 1.128671746 | 75423 |
| 75423 | 96751_at    | Arf5a      | ADP-ribosylation factor-like 5A                                 | 0.591364742  | 0.492967334 | Arf5a     | 1.128671746 | 75423 |
| 75553 | 97380_at    | Zc3h14     | zinc finger CCH type containing 14                              | 0.210875457  | 0.853552709 | Zc3h14    | 1.397814281 | 75553 |
| 75956 | 101203_r_at | Srm2       | serine/arginine repetitive matrix 2                             | 0.042727306  | NA          | Srm2      | 1.200826972 | 75956 |
| 76267 | 160391_at   | Fads1      | fatty acid desaturase 1                                         | -0.078042978 | NA          | Fads1     | 1.783558675 | 76267 |
| 76709 | 93288_at    | Arpe2      | actin related protein 2/3 complex, subunit 2                    | 0.106100026  | 0.956690982 | Arpe2     | 1.005361839 | 76709 |
| 76737 | 160119_at   | NA         | NA                                                              | 0.033152113  | NA          | Crelk2    | 1.076747281 | 76737 |
| 76843 | 104423_at   | Dtl        | denticleless homolog (Drosophila)                               | 0.790797991  | 0.076788766 | Dtl       | 3.539145918 | 76843 |
| 76863 | 96647_at    | Dcun1d5    | DCN1, defective in cullin neddylation 1, domain containing 5    | -0.504140401 | 0.793527575 | Dcun1d5   | 2.10563786  | 76863 |
| 76936 | 96266_at    | Hnrnpm     | heterogeneous nuclear ribonucleoprotein M                       | -0.501097908 | 0.67887747  | Hnrnpm    | 1.330082697 | 76936 |
| 77065 | 100004_at   | Ints7      | integrator complex subunit 7                                    | -0.230043135 | 0.853552709 | Ints7     | 1.46506506  | 77065 |
| 77891 | 94274_at    | Ube2s      | ubiquitin-conjugating enzyme E2S                                | 0.089124904  | 0.950433011 | Ube2s     | 1.649075331 | 77891 |
| 78394 | 160627_at   | Ddx52      | DEAD (Asp-Glu-Ala-Asp) box polypeptide 52                       | 0.031723579  | 0.980325583 | Ddx52     | 1.136121899 | 78394 |
| 78928 | 96145_at    | Pigt       | phosphatidylinositol glycan anchor biosynthesis, class T        | 0.005979916  | NA          | Pigt      | 1.034708573 | 78928 |
| 79555 | 94830_at    | BC005537   | cDNA sequence BC005537                                          | -0.417824492 | 0.870655202 | BC005537  | 1.197134    | 79555 |

|       |            |         |                                                             |              |             |         |             |       |
|-------|------------|---------|-------------------------------------------------------------|--------------|-------------|---------|-------------|-------|
| 80750 | 103930_at  | N4bp1   | NEDD4 binding protein 1                                     | 0.68558108   | 0.451972264 | N4bp1   | 1.035150453 | 80750 |
| 80838 | 94114_at   | Histh1a | histone cluster 1, H1a                                      | 0.122279919  | NA          | Histh1a | 1.957498664 | 80838 |
| 80876 | 93018_at   | NA      | NA                                                          | 0.0922280986 | NA          | Ifitm2  | 1.31605049  | 80876 |
| 80914 | 94367_at   | Uck2    | uridine-cytidine kinase 2                                   | 0.212255421  | 0.842747643 | Uck2    | 1.998779985 | 80914 |
| 80986 | 104322_at  | Ckap2   | cytoskeleton associated protein 2                           | 0.368605885  | 0.575994987 | Ckap2   | 2.053046291 | 80986 |
| 81004 | 102889_at  | Tblxr1  | transducin (beta)-like 1X-linked receptor 1                 | 0.023968068  | 0.992515226 | Tblxr1  | 1.587914282 | 81004 |
| 81702 | 104683_at  | Ankrd17 | ankyrin repeat domain 17                                    | -0.491930752 | 0.788808158 | Ankrd17 | 1.228897922 | 81702 |
| 81702 | 102118_at  | Ankrd17 | ankyrin repeat domain 17                                    | 0.134879862  | NA          | Ankrd17 | 1.228897922 | 81702 |
| 81702 | 99031_at   | Ankrd17 | ankyrin repeat domain 17                                    | -0.115283521 | 0.953391829 | Ankrd17 | 1.228897922 | 81702 |
| 83962 | 94877_at   | Btbd1   | BTB (POZ) domain containing 1                               | 0.057021914  | NA          | Btbd1   | 1.291150631 | 83962 |
| 83962 | 94878_at   | Btbd1   | BTB (POZ) domain containing 1                               | -0.464505958 | 0.568775091 | Btbd1   | 1.291150631 | 83962 |
| 93687 | 93076_at   | Csnkia1 | casein kinase 1, alpha 1                                    | -0.574481121 | 0.811127774 | Csnkia1 | 1.058387621 | 93687 |
| 93687 | 99650_at   | Csnkia1 | casein kinase 1, alpha 1                                    | -0.390938154 | 0.80380195  | Csnkia1 | 1.058387621 | 93687 |
| 93736 | 95888_at   | Aff4    | AF4/FMR2 family, member 4                                   | 0.081954586  | NA          | Aff4    | 1.064465645 | 93736 |
| 94181 | 104147_at  | Nans    | N-acetylneuraminic acid synthase (sialic acid synthase)     | 0.470898422  | 0.556313214 | Nans    | 1.101570595 | 94181 |
| 97908 | 93023_f_at | NA      | NA                                                          | 0.449393577  | 0.573931951 | Histh3g | 2.160604086 | 97908 |
| 97908 | 96416_f_at | NA      | NA                                                          | 0.19674045   | 0.882283725 | Histh3g | 2.160604086 | 97908 |
| 97908 | 93024_at   | Histh3g | histone cluster 1, H3g                                      | 0.119184617  | NA          | Histh3g | 2.160604086 | 97908 |
| 98238 | 94486_at   | Lrrc59  | leucine rich repeat containing 59                           | 0.264281207  | 0.793527575 | Lrrc59  | 1.348200897 | 98238 |
| 98415 | 160885_at  | Nucks1  | nuclear casein kinase and cyclin-dependent kinase substrate | -0.505117933 | 0.853552709 | Nucks1  | 2.115187126 | 98415 |
| 98415 | 96833_at   | Nucks1  | nuclear casein kinase and cyclin-dependent kinase substrate | 0.156695969  | 0.907781441 | Nucks1  | 2.115187126 | 98415 |

| Genes uniquely downregulated in the in vitro-generated engineered effector T cells |              |             |                                                                  |              | Entrez.Gene      |          |                |             |
|------------------------------------------------------------------------------------|--------------|-------------|------------------------------------------------------------------|--------------|------------------|----------|----------------|-------------|
| Entrez.Gene                                                                        | Probe.Set.ID | Symbol      | Name                                                             | logFC.Wherry | adj.P.Val.Wherry | SYMBOL   | logFC.Stromnes | Entrez.Gene |
| 108755                                                                             | 102368_at    | Lymr2       | LXR motif containing 2                                           | -0.264866345 | 0.908136447      | Lymr2    | -1.037385491   | 108755      |
| 114664                                                                             | 102370_at    | Hsd17b11    | hydroxysteroid (17-beta) dehydrogenase 11                        | -0.87357956  | 0.047726655      | Hsd17b11 | -1.062557061   | 114664      |
| 11852                                                                              | 101030_at    | Rhob        | ras homolog gene family, member B                                | -0.684733024 | 0.231806186      | Rhob     | -1.395669265   | 11852       |
| 12478                                                                              | 99945_at     | Cd19        | CD19 antigen                                                     | -0.237853571 | 0.867882078      | Cd19     | -1.030432999   | 12478       |
| 12480                                                                              | 101896_at    | Cd1d2       | CD1d2 antigen                                                    | -0.209658085 | NA               | Cd1d2    | -1.055792638   | 12480       |
| 12482                                                                              | 104173_at    | Ms4a1       | membrane-spanning 4-domains, subfamily A, member 1               | -0.215863598 | 0.836127571      | Ms4a1    | -1.665650722   | 12482       |
| 12482                                                                              | 99446_at     | Ms4a1       | membrane-spanning 4-domains, subfamily A, member 1               | -1.041561704 | 0.291243276      | Ms4a1    | -1.665650722   | 12482       |
| 12483                                                                              | 102939_s_at  | Cd22        | CD22 antigen                                                     | -0.312680611 | 0.766529632      | Cd22     | -1.092323287   | 12483       |
| 12902                                                                              | 102289_r_at  | Cr2         | complement receptor 2                                            | -0.031254202 | NA               | Cr2      | -1.318605568   | 12902       |
| 13136                                                                              | 92198_s_at   | NA          | NA                                                               | -0.608310927 | 0.185457742      | Cd55     | -1.598468338   | 13136       |
| 13136                                                                              | 103617_at    | Cd55        | CD55 antigen                                                     | -0.562132731 | NA               | Cd55     | -1.598468338   | 13136       |
| 14128                                                                              | 94411_at     | Feer2a      | Fe receptor, IgE, low affinity II, alpha polypeptide             | -0.101468959 | 0.972911278      | Feer2a   | -1.015463912   | 14128       |
| 14960                                                                              | 92866_at     | H2-Aa       | histocompatibility 2, class II antigen A, alpha                  | -0.85196514  | 0.697648235      | H2-Aa    | -1.569941616   | 14960       |
| 14961                                                                              | 100998_at    | H2-Ab1      | histocompatibility 2, class II antigen A, beta 1                 | -0.404139163 | 0.80380195       | H2-Ab1   | -1.653645394   | 14961       |
| 14969                                                                              | 94285_at     | H2-Eb1      | histocompatibility 2, class II antigen E, beta                   | -0.628316686 | 0.579063751      | H2-Eb1   | -1.48405621    | 14969       |
| 15446                                                                              | 93351_at     | Hpgd        | hydroxyprostaglandin dehydrogenase 15 (NAD)                      | -0.212185395 | NA               | Hpgd     | -1.034187186   | 15446       |
| 16069                                                                              | 102372_at    | Igj         | immunoglobulin joining chain                                     | -0.650258156 | 0.405766445      | Jchain   | -1.792676494   | 16069       |
| 16142                                                                              | 93638_s_at   | NA          | NA                                                               | -0.161255795 | NA               | Iglv1    | -1.912829147   | 16142       |
| 16142                                                                              | 92316_f_at   | 2010309G21f | RIKEN cDNA 2010309G21 gene                                       | -0.612898515 | 0.501200855      | Iglv1    | -1.912829147   | 16142       |
| 16598                                                                              | 96109_at     | Klf2        | Kruppel-like factor 2 (lung)                                     | -0.209225107 | 0.842747643      | Klf2     | -1.057463207   | 16598       |
| 16641                                                                              | 99370_at     | Klrc1       | killer cell lectin-like receptor subfamily C, member 1           | 2.134327837  | 0.00022616       | Klrc1    | -1.833151333   | 16641       |
| 16643                                                                              | 93677_at     | Klrd1       | killer cell lectin-like receptor, subfamily D, member 1          | 0.368684268  | 0.504599498      | Klrd1    | -2.181975894   | 16643       |
| 170743                                                                             | 95884_at     | Tlr7        | toll-like receptor 7                                             | -0.06860502  | NA               | Tlr7     | -1.146712944   | 170743      |
| 17084                                                                              | 94425_at     | Ly86        | lymphocyte antigen 86                                            | -0.075543837 | 0.9628001        | Ly86     | -1.803665079   | 17084       |
| 17105                                                                              | 100611_at    | Ly2z        | lysozyme 2                                                       | -0.311886452 | NA               | Ly2z     | -1.095554816   | 17105       |
| 17105                                                                              | 101753_s_at  | NA          | NA                                                               | 0.11177196   | 0.972911278      | Ly2z     | -1.095554816   | 17105       |
| 17105                                                                              | 162309_at    | NA          | NA                                                               | 0.056566802  | NA               | Ly2z     | -1.095554816   | 17105       |
| 18054                                                                              | 96153_at     | Ngp         | neutrophilic granule protein                                     | -0.025695605 | 0.982378186      | Ngp      | -1.553437588   | 18054       |
| 18646                                                                              | 93931_at     | Prf1        | perforin 1 (pore forming protein)                                | 1.376224829  | 0.003537229      | Prf1     | -1.705995795   | 18646       |
| 20201                                                                              | 103448_at    | S100a8      | S100 calcium binding protein A8 (calgranulin A)                  | 0.223467485  | 0.940766699      | S100a8   | -2.822441129   | 20201       |
| 20202                                                                              | 103887_at    | S100a9      | S100 calcium binding protein A9 (calgranulin B)                  | 0.26315768   | 0.922432602      | S100a9   | -2.316210784   | 20202       |
| 20592                                                                              | 100272_at    | Kdm5d       | lysine (K)-specific demethylase 5d                               | -0.053344397 | NA               | Kdm5d    | -1.384086421   | 20592       |
| 22290                                                                              | 95337_at     | Uty         | ubiquitously transcribed tetraatricopeptide repeat gene, Y chr   | 0.036047971  | NA               | Uty      | -1.640836378   | 22290       |
| 22354                                                                              | 98777_at     | Vipr1       | vasoactive intestinal peptide receptor 1                         | -0.043395949 | NA               | Vipr1    | -1.013241435   | 22354       |
| 24110                                                                              | 95024_at     | Usp18       | ubiquitin specific peptidase 18                                  | 0.37700633   | 0.612561656      | Usp18    | -1.050486935   | 24110       |
| 243469                                                                             | 101332_at    | Igk         | immunoglobulin kappa chain complex                               | 0.076584554  | NA               | Igk      | -1.892924143   | 243469      |
| 243469                                                                             | 101332_at    | Igk         | immunoglobulin kappa chain complex                               | 0.076584554  | NA               | Igk      | -0.114023121   | 243469      |
| 243469                                                                             | 101332_at    | Igk         | immunoglobulin kappa chain complex                               | 0.076584554  | NA               | Igk      | -2.2333293     | 243469      |
| 243469                                                                             | 101332_at    | Igk         | immunoglobulin kappa chain complex                               | 0.076584554  | NA               | Igk      | -1.536415638   | 243469      |
| 243469                                                                             | 101332_at    | Igk         | immunoglobulin kappa chain complex                               | 0.076584554  | NA               | Igk      | -1.480117374   | 243469      |
| 243469                                                                             | 101332_at    | Igk         | immunoglobulin kappa chain complex                               | 0.076584554  | NA               | Igk      | -0.150525964   | 243469      |
| 26900                                                                              | 103842_at    | Ddx3y       | DEAD (Asp-Glu-Ala-Asp) box polypeptide 3, Y-linked               | 0.047458629  | NA               | Ddx3y    | -2.974299919   | 26900       |
| 26908                                                                              | 103674_f_at  | Eif2s3y     | eukaryotic translation initiation factor 2, subunit 3, structure | -0.113029737 | NA               | Eif2s3y  | -1.82412276    | 26908       |
| 27027                                                                              | 104239_at    | Tspan32     | tetraspanin 32                                                   | -0.758934636 | 0.482240199      | Tspan32  | -1.447486765   | 27027       |
| 56753                                                                              | 160651_at    | Taestd2     | tumor-associated calcium signal transducer 2                     | 0.028566243  | NA               | Taestd2  | -1.271625616   | 56753       |

|       |            |         |                                                             |              |             |         |              |       |
|-------|------------|---------|-------------------------------------------------------------|--------------|-------------|---------|--------------|-------|
| 56753 | 103648_at  | Tacstd2 | tumor-associated calcium signal transducer 2                | 0.229226551  | 0.850790718 | Tacstd2 | -1.271625616 | 56753 |
| 57738 | 103918_at  | Slc15a2 | solute carrier family 15 (H+/peptide transporter), member 2 | 0.053362307  | NA          | Slc15a2 | -1.448421631 | 57738 |
| 76024 | 94136_at   | Gm11346 | X-linked lymphocyte-regulated 5 pseudogene                  | -1.205185452 | 0.115795666 | Gm11346 | -1.013268765 | 76024 |
| 77128 | 98855_r_at | Crebrf  | CREB3 regulatory factor                                     | 0.024745594  | 0.986969008 | Crebrf  | -1.278498222 | 77128 |
| 79560 | 94865_at   | Ublp1   | ubiquitin-like domain containing CTD phosphatase 1          | 0.088462014  | 0.956699082 | Ublp1   | -1.200413865 | 79560 |

**Genes uniquely upregulated in the in vivo-generated effector CD8+ T cells**

| Entrez.Gene | Probe.Set.ID | Symbol   | Name                                                        | logFC.Wherry | adj.P.Val.Wherry | SYMBOL   | logFC.Stromnes | Entrez.Gene |
|-------------|--------------|----------|-------------------------------------------------------------|--------------|------------------|----------|----------------|-------------|
| 105245      | 98918_at     | Txndc5   | thioredoxin domain containing 5                             | 1.220031014  | 0.021260651      | Txndc5   | 0.173670283    | 105245      |
| 107350      | 100944_at    | AW112010 | expressed sequence AW112010                                 | 1.469583706  | 0.001593294      | AW112010 | 0.251680388    | 107350      |
| 114584      | 95654_at     | NA       | NA                                                          | 1.202595123  | 0.005129336      | Clic1    | 0.963069759    | 114584      |
| 11492       | 103554_at    | Adam19   | a disintegrin and metallopeptidase domain 19 (meltrin beta) | 1.237855784  | 0.008570063      | Adam19   | 0.931232628    | 11492       |
| 12044       | 102913_at    | NA       | NA                                                          | -0.069373474 | NA               | Bcl2a1a  | 0.40086899     | 12044       |
| 12044       | 102914_s_at  | NA       | NA                                                          | 1.303333556  | 0.009479682      | Bcl2a1a  | 0.40086899     | 12044       |
| 12044       | 93869_s_at   | NA       | NA                                                          | 1.429936911  | 0.018769027      | Bcl2a1a  | 0.40086899     | 12044       |
| 12334       | 101040_at    | Capn2    | calpain 2                                                   | 1.269923956  | 0.026820595      | Capn2    | 0.371973746    | 12334       |
| 12334       | 162112_i_at  | NA       | NA                                                          | 0.027100846  | NA               | Capn2    | 0.371973746    | 12334       |
| 12362       | 102064_at    | Casp1    | caspase 1                                                   | 1.159407078  | 0.014152511      | Casp1    | -0.352241147   | 12362       |
| 12393       | 161378_r_at  | Runx2    | runt related transcription factor 2                         | -0.058870148 | NA               | Runx2    | 0.136923385    | 12393       |
| 12393       | 92677_s_at   | Runx2    | runt related transcription factor 2                         | 0.2538115    | 0.80380195       | Runx2    | 0.136923385    | 12393       |
| 12393       | 92676_at     | Runx2    | runt related transcription factor 2                         | 1.749318082  | 0.000466852      | Runx2    | 0.136923385    | 12393       |
| 12506       | 103089_at    | Cd48     | CD48 antigen                                                | 1.168199334  | 0.017596359      | Cd48     | 0.481015005    | 12506       |
| 12766       | 94173_at     | Cxcr3    | chemokine (C-X-C motif) receptor 3                          | 2.266980085  | 6.58E-05         | Cxcr3    | 0.398988139    | 12766       |
| 12772       | 93397_at     | Ccr2     | chemokine (C-C motif) receptor 2                            | 4.161522687  | 5.81E-06         | Ccr2     | 0.406879441    | 12772       |
| 12774       | 16198_f_at   | Ccr5     | chemokine (C-C motif) receptor 5                            | 4.877441521  | 2.00E-05         | Ccr5     | 0.984091011    | 12774       |
| 12774       | 102719_f_at  | Ccr5     | chemokine (C-C motif) receptor 5                            | 1.388146755  | NA               | Ccr5     | 0.984091011    | 12774       |
| 12774       | 102718_at    | Ccr5     | chemokine (C-C motif) receptor 5                            | 2.904566546  | 0.000251614      | Ccr5     | 0.984091011    | 12774       |
| 12856       | 160230_at    | Cox17    | cytochrome c oxidase assembly protein 17                    | 1.291480749  | 0.00331217       | Cox17    | 0.806746745    | 12856       |
| 13730       | 97426_at     | Emp1     | epithelial membrane protein 1                               | 2.91580198   | 0.00712399       | Emp1     | 0.058086703    | 13730       |
| 14103       | 97113_at     | FasL     | Fas ligand (TNF superfamily, member 6)                      | 2.643953371  | 0.000157507      | FasL     | -0.202940609   | 14103       |
| 14130       | 102337_s_at  | Fcgr2b   | Fc receptor, IgG, low affinity IIb                          | 1.173489871  | 0.007681677      | Fcgr2b   | -0.537529949   | 14130       |
| 14945       | 99398_at     | Gzmk     | granzyme K                                                  | 3.130985383  | 5.72E-06         | Gzmk     | -0.380476049   | 14945       |
| 15007       | 101898_s_at  | H2-Q10   | histocompatibility 2, Q region locus 10                     | 1.373702292  | 0.007402918      | H2-Q10   | 0.152638974    | 15007       |
| 15978       | 99334_at     | Irfng    | interferon gamma                                            | 2.510245441  | 0.001273793      | Irfng    | -0.036824154   | 15978       |
| 16174       | 95333_at     | Ili8rap  | interleukin 18 receptor accessory protein                   | 2.713102394  | 2.00E-05         | Ili8rap  | 0.480908619    | 16174       |
| 16182       | 101144_at    | Ili8r1   | interleukin 18 receptor 1                                   | 2.032275419  | 0.013913982      | Ili8r1   | -0.89084812    | 16182       |
| 16401       | 102656_at    | Itga4    | integrin alpha 4                                            | 0.567488249  | 0.459839668      | Itga4    | 0.790913342    | 16401       |
| 16401       | 102655_at    | Itga4    | integrin alpha 4                                            | 1.946356274  | 0.002544546      | Itga4    | 0.790913342    | 16401       |
| 16401       | 95292_at     | Itga4    | integrin alpha 4                                            | 2.070180084  | 0.00331217       | Itga4    | 0.790913342    | 16401       |
| 16411       | 104308_at    | Itgax    | integrin alpha X                                            | 2.917898779  | 1.46E-05         | Itgax    | -0.133456592   | 16411       |
| 16412       | 100123_f_at  | Itgb1    | integrin beta 1 (fibronectin receptor beta)                 | 1.889876173  | 0.007486995      | Itgb1    | 0.531128835    | 16412       |
| 16412       | 100124_r_at  | Itgb1    | integrin beta 1 (fibronectin receptor beta)                 | 1.955164561  | 0.000947393      | Itgb1    | 0.531128835    | 16412       |
| 16543       | 102644_at    | Mdfic    | MyoD family inhibitor domain containing                     | 1.642459214  | 0.016768675      | Mdfic    | 0.865748593    | 16543       |
| 16641       | 99370_at     | Klrc1    | killer cell lectin-like receptor subfamily C, member 1      | 2.1343227837 | 0.00022616       | Klrc1    | -1.831315133   | 16641       |
| 16854       | 95706_at     | Igals3   | lectin, galactose binding, soluble 3                        | 2.44005364   | 0.000482852      | Igals3   | 0.197274099    | 16854       |
| 16952       | 93038_f_at   | Anxa1    | annexin A1                                                  | 3.625753733  | 2.38E-05         | Anxa1    | -0.177670586   | 16952       |
| 16952       | 161703_f_at  | Anxa1    | annexin A1                                                  | 2.988645725  | 0.000139683      | Anxa1    | -0.177670586   | 16952       |
| 16952       | 93037_i_at   | Anxa1    | annexin A1                                                  | 1.739881743  | NA               | Anxa1    | -0.177670586   | 16952       |
| 17035       | 96065_at     | Lxn      | latexin                                                     | 1.155597871  | 0.006072566      | Lxn      | 0.923720485    | 17035       |
| 17067       | 93077_s_at   | NA       | NA                                                          | 1.840857748  | 0.000139683      | Ly6c1    | 0.54539318     | 17067       |
| 17916       | 101708_at    | Myoif    | myosin IF                                                   | 1.588867482  | 0.001273793      | Myoif    | 0.790878519    | 17916       |
| 18646       | 93931_at     | Prfi     | perforin 1 (pore forming protein)                           | 1.376224829  | 0.003537229      | Prfi     | -1.705995795   | 18646       |
| 19347       | 104108_at    | Dendd5a  | DENN/MADD domain containing 5A                              | 1.13245403   | 0.009479682      | Dendd5a  | 0.049400933    | 19347       |
| 19883       | 101889_s_at  | Rora     | RAR-related orphan receptor alpha                           | 1.400489723  | 0.002386292      | Rora     | -0.166862523   | 19883       |
| 19883       | 101888_at    | Rora     | RAR-related orphan receptor alpha                           | 0.174643141  | 0.894733333      | Rora     | -0.166862523   | 19883       |
| 20194       | 92539_at     | St100a10 | St100 calcium binding protein A10 (calpactin)               | 1.899763732  | 0.000280938      | St100a10 | 0.488955368    | 20194       |
| 20194       | 162340_r_at  | St100a10 | St100 calcium binding protein A10 (calpactin)               | 0.34980654   | 0.539327141      | St100a10 | 0.488955368    | 20194       |
| 20195       | 98600_at     | NA       | NA                                                          | 1.999320794  | 0.000513538      | St100a11 | 0.370554223    | 20195       |
| 20196       | 100960_g_at  | St100a13 | St100 calcium binding protein A13                           | 0.742266208  | 0.323833629      | St100a13 | 0.196901869    | 20196       |
| 20196       | 161862_i_at  | St100a13 | St100 calcium binding protein A13                           | 0.394999089  | 0.437400662      | St100a13 | 0.196901869    | 20196       |
| 20196       | 100959_at    | St100a13 | St100 calcium binding protein A13                           | 1.9792471    | 0.001004265      | St100a13 | 0.196901869    | 20196       |
| 20196       | 161121_f_at  | St100a13 | St100 calcium binding protein A13                           | 1.769244357  | 0.002526576      | St100a13 | 0.196901869    | 20196       |
| 20304       | 98406_at     | Ccl5     | chemokine (C-C motif) ligand 5                              | 5.091797484  | 6.75E-06         | Ccl5     | -0.616781294   | 20304       |
| 20335       | 92636_f_at   | NA       | NA                                                          | 1.416870004  | 0.044229127      | Sec61g   | 0.215501172    | 20335       |
| 20400       | 103279_at    | Sh2d1a   | SH2 domain protein 1A                                       | 1.170175294  | 0.026820595      | Sh2d1a   | -0.134037499   | 20400       |
| 20723       | 98405_at     | Serpinb9 | serine (or cysteine) peptidase inhibitor, clade B, member 9 | 1.999694022  | 0.021624534      | Serpinb9 | 0.000629048    | 20723       |
| 20893       | 104701_at    | Bhlhe40  | basic helix-loop-helix family, member e40                   | 3.471264074  | 0.000144775      | Bhlhe40  | 0.493453089    | 20893       |
| 21946       | 104099_at    | Pglyrp1  | peptidoglycan recognition protein 1                         | 1.083710278  | 0.010956421      | Pglyrp1  | -0.21818204    | 21946       |

|        |             |         |                                                             |             |             |         |              |        |
|--------|-------------|---------|-------------------------------------------------------------|-------------|-------------|---------|--------------|--------|
| 21946  | 162475_f_at | Pglyrp1 | peptidoglycan recognition protein 1                         | 1.740594212 | 0.000466852 | Pglyrp1 | -0.21818204  | 21946  |
| 22038  | 102839_at   | Plscr1  | phospholipid scramblase 1                                   | 1.21020895  | 0.026820595 | Plscr1  | 0.52119224   | 22038  |
| 27007  | 93679_at    | Klrk1   | killer cell lectin-like receptor subfamily K, member 1      | 2.03072414  | 0.00010356  | Klrk1   | -0.565737622 | 27007  |
| 27007  | 93678_s_at  | Klrk1   | killer cell lectin-like receptor subfamily K, member 1      | 1.80033394  | 0.001630665 | Klrk1   | -0.565737622 | 27007  |
| 329650 | 95916_at    | Med12   | mediator of RNA polymerase II transcription, subunit 12 hor | 1.2631893   | 0.026820595 | Med12   | -0.09111229  | 329650 |
| 50928  | 95320_at    | Klrg1   | killer cell lectin-like receptor subfamily G, member 1      | 5.083520213 | 1.45E-05    | Klrg1   | -0.640550603 | 50928  |
| 56018  | 96735_at    | Stard10 | START domain containing 10                                  | 1.281633057 | 0.014668898 | Stard10 | -0.252133373 | 56018  |
| 66151  | 96278_at    | Prr13   | proline rich 13                                             | 1.446403903 | 0.005286273 | Prr13   | 0.503879456  | 66151  |
| 67103  | 98440_at    | Ptgr1   | prostaglandin reductase 1                                   | 1.230475257 | 0.019951345 | Ptgr1   | 0.564118274  | 67103  |
| 68813  | 103260_at   | Dock5   | dedicator of cytokinesis 5                                  | 2.251184902 | 0.002564929 | Dock5   | 0.366520596  | 68813  |
| 70025  | 100539_at   | Acot7   | acyl-CoA thioesterase 7                                     | 1.806608072 | 0.00020313  | Acot7   | 0.547599307  | 70025  |
| 71982  | 94556_at    | Snx10   | sorting nexin 10                                            | 1.23610112  | 0.006215202 | Snx10   | 0.24592731   | 71982  |
| 74155  | 93975_at    | Errf1   | ERBB receptor feedback inhibitor 1                          | 1.719051275 | 0.02071006  | Errf1   | 0.939935257  | 74155  |
| 74155  | 93974_at    | Errf1   | ERBB receptor feedback inhibitor 1                          | 0.411504668 | 0.397767519 | Errf1   | 0.939935257  | 74155  |
| 74318  | 96672_at    | Hopx    | HOP homeobox                                                | 2.234340502 | 0.000144775 | Hopx    | 0.05852524   | 74318  |
| 93692  | 95722_at    | Glrx    | glutaredoxin                                                | 1.177385186 | 0.009479682 | Glrx    | 0.364454686  | 93692  |
| 98366  | 160196_at   | Smap1   | stromal membrane-associated protein 1                       | 1.013363794 | 0.037843607 | Smap1   | 0.405248183  | 98366  |

| Genes uniquely downregulated in the in vivo-generated effector CD8+ T cells |              |         |                                                                    |               |                  |         |                |             |
|-----------------------------------------------------------------------------|--------------|---------|--------------------------------------------------------------------|---------------|------------------|---------|----------------|-------------|
| Entrez.Gene                                                                 | Probe.Set.ID | Symbol  | Name                                                               | logFC.Wherry  | adj.P.Val.Wherry | SYMBOL  | logFC.Stromnes | Entrez.Gene |
| 101476                                                                      | 161027_f_at  | Plekha1 | pleckstrin homology domain containing, family A (phosphoinositide) | -0.441201261  | 0.388803716      | Plekha1 | -0.467058764   | 101476      |
| 101476                                                                      | 94359_at     | Plekha1 | pleckstrin homology domain containing, family A (phosphoinositide) | -2.195916414  | 0.000106348      | Plekha1 | -0.467058764   | 101476      |
| 101476                                                                      | 162252_f_at  | Plekha1 | pleckstrin homology domain containing, family A (phosphoinositide) | -0.201334529  | NA               | Plekha1 | -0.467058764   | 101476      |
| 103784                                                                      | 99849_at     | Wdr92   | WD repeat domain 92                                                | -1.00606779   | 0.038622117      | Wdr92   | 0.447154768    | 103784      |
| 104662                                                                      | 93488_at     | NA      | NA                                                                 | -1.766337248  | 0.012261644      | Tsr1    | 0.709413046    | 104662      |
| 109711                                                                      | 104579_r_at  | Actn1   | actin, alpha 1                                                     | -0.4110977693 | 0.021702853      | Actn1   | 0.248100902    | 109711      |
| 109711                                                                      | 104578_f_at  | Actn1   | actin, alpha 1                                                     | -2.678260912  | 0.010270622      | Actn1   | 0.248100902    | 109711      |
| 109711                                                                      | 92280_at     | Actn1   | actin, alpha 1                                                     | -0.460864157  | 0.322156225      | Actn1   | 0.248100902    | 109711      |
| 11303                                                                       | 94354_at     | Abca1   | ATP-binding cassette, sub-family A (ABC1), member 1                | -1.984383394  | 0.004840076      | Abca1   | -0.469350219   | 11303       |
| 11303                                                                       | 97198_at     | Abca1   | ATP-binding cassette, sub-family A (ABC1), member 1                | 0.077847136   | NA               | Abca1   | -0.469350219   | 11303       |
| 114716                                                                      | 161070_at    | Spred2  | sprouty-related, EVH1 domain containing 2                          | -1.283354472  | 0.016324917      | Spred2  | 0.534434089    | 114716      |
| 11792                                                                       | 93559_at     | Apex1   | apurinic/ypyrimidinic endonuclease 1                               | -1.077511293  | 0.014152511      | Apex1   | 0.487645257    | 11792       |
| 12043                                                                       | 98870_at     | Bcl2    | B cell leukemia/lymphoma 2                                         | -0.224785378  | 0.822790247      | Bcl2    | 1.749843723    | 12043       |
| 12043                                                                       | 98869_g_at   | Bcl2    | B cell leukemia/lymphoma 2                                         | -1.025138331  | 0.018769027      | Bcl2    | 1.749843723    | 12043       |
| 12043                                                                       | 98868_at     | Bcl2    | B cell leukemia/lymphoma 2                                         | -2.27871778   | 0.000513538      | Bcl2    | 1.749843723    | 12043       |
| 12444                                                                       | 97504_at     | Cnd2    | cyclin D2                                                          | -1.237292083  | 0.005226562      | Cnd2    | 0.982267591    | 12444       |
| 12516                                                                       | 92406_at     | Cd7     | CD7 antigen                                                        | -1.00962838   | 0.031465157      | Cd7     | -0.769838276   | 12516       |
| 12517                                                                       | 101878_at    | Cd72    | CD72 antigen                                                       | -1.766127009  | 0.023660774      | Cd72    | -0.475550096   | 12517       |
| 12702                                                                       | 162206_f_at  | Soes3   | suppressor of cytokine signaling 3                                 | -1.690348988  | 0.005257553      | Soes3   | -0.632238635   | 12702       |
| 12702                                                                       | 92232_at     | Soes3   | suppressor of cytokine signaling 3                                 | -0.246792152  | 0.849957674      | Soes3   | -0.632238635   | 12702       |
| 12750                                                                       | 101937_s_at  | Clk4    | CDC like kinase 4                                                  | -0.134576006  | 0.932004521      | Clk4    | 0.387859761    | 12750       |
| 12750                                                                       | 101936_at    | Clk4    | CDC like kinase 4                                                  | -0.101722099  | 0.042884923      | Clk4    | 0.387859761    | 12750       |
| 12775                                                                       | 104443_at    | Ccr7    | chemokine (C-C motif) receptor 7                                   | -3.083961422  | 5.04E-05         | Ccr7    | 0.046835755    | 12775       |
| 13039                                                                       | 101963_at    | Ctsl    | cathepsin L                                                        | -1.151256651  | 0.01962058       | Ctsl    | -0.309057984   | 13039       |
| 13040                                                                       | 98543_at     | Ctss    | cathepsin S                                                        | -1.091047277  | 0.016540922      | Ctss    | -0.219778617   | 13040       |
| 13139                                                                       | 103596_at    | Dgka    | diacylglycerol kinase, alpha                                       | -1.248650442  | 0.021260651      | Dgka    | 0.435528687    | 13139       |
| 13197                                                                       | 102292_at    | Gadd45a | growth arrest and DNA-damage-inducible 45 alpha                    | -1.503751586  | 0.014668898      | Gadd45a | -0.333966226   | 13197       |
| 13723                                                                       | 162068_r_at  | Emb     | embin                                                              | 0.105494094   | NA               | Emb     | 0.622483867    | 13723       |
| 13723                                                                       | 101560_at    | Emb     | embin                                                              | -1.399044954  | 0.036013531      | Emb     | 0.622483867    | 13723       |
| 14026                                                                       | 160667_at    | Evl     | Ena-vasodilator stimulated phosphoprotein                          | -1.530328179  | 0.000600372      | Evl     | 0.161946641    | 14026       |
| 14026                                                                       | 161808_f_at  | Evl     | Ena-vasodilator stimulated phosphoprotein                          | -1.22041268   | 0.007681677      | Evl     | 0.161946641    | 14026       |
| 140742                                                                      | 95731_at     | Sesn1   | sestrin 1                                                          | -2.110057169  | 0.000293145      | Sesn1   | -0.042152157   | 140742      |
| 14281                                                                       | 161716_at    | Fos     | FBJ osteosarcoma oncogene                                          | -0.155900665  | NA               | Fos     | -0.627077632   | 14281       |
| 14281                                                                       | 160901_at    | Fos     | FBJ osteosarcoma oncogene                                          | -2.269358084  | 0.033779336      | Fos     | -0.627077632   | 14281       |
| 15312                                                                       | 96699_at     | NA      | NA                                                                 | -1.517125612  | 0.001925095      | Hmgn1   | -0.090584354   | 15312       |
| 15526                                                                       | 97914_at     | Hspa9   | heat shock protein 9                                               | -1.677976059  | 0.036423451      | Hspa9   | 1.290306832    | 15526       |
| 16010                                                                       | 94222_at     | Igf1bp4 | insulin-like growth factor binding protein 4                       | -0.282881041  | 0.731531624      | Igf1bp4 | -0.440225338   | 16010       |
| 16010                                                                       | 101570_at    | Igf1bp4 | insulin-like growth factor binding protein 4                       | -0.206026052  | NA               | Igf1bp4 | -0.440225338   | 16010       |
| 16010                                                                       | 101571_g_at  | Igf1bp4 | insulin-like growth factor binding protein 4                       | -1.129624339  | 0.008570063      | Igf1bp4 | -0.440225338   | 16010       |
| 16190                                                                       | 102021_at    | Il4ra   | interleukin 4 receptor, alpha                                      | -1.238492293  | 0.01892847       | Il4ra   | 0.826493763    | 16190       |
| 16190                                                                       | 161192_at    | Il4ra   | interleukin 4 receptor, alpha                                      | -0.390510224  | 0.619433184      | Il4ra   | 0.826493763    | 16190       |
| 16407                                                                       | 161730_f_at  | Itgae   | integrin alpha E, epithelial-associated                            | -1.02766595   | 0.127948339      | Itgae   | -0.520102177   | 16407       |
| 16407                                                                       | 93991_at     | Itgae   | integrin alpha E, epithelial-associated                            | -2.40550613   | 0.000545357      | Itgae   | -0.520102177   | 16407       |
| 17125                                                                       | 102983_at    | Smad1   | SMAD family member 1                                               | -2.575601234  | 0.000416825      | Smad1   | 0.035232985    | 17125       |
| 17125                                                                       | 102984_g_at  | Smad1   | SMAD family member 1                                               | -2.48899859   | 0.001097476      | Smad1   | 0.035232985    | 17125       |
| 17131                                                                       | 92216_at     | Smad7   | SMAD family member 7                                               | -1.048684924  | 0.018769027      | Smad7   | -0.318371843   | 17131       |
| 17869                                                                       | 104712_at    | Myc     | myelocytomatosis oncogene                                          | -1.561480152  | 0.00673194       | Myc     | 0.773786827    | 17869       |
| 18197                                                                       | 160413_at    | Nsg2    | neuron specific gene family member 2                               | -2.458751618  | 0.000370242      | Nsg2    | -0.652914523   | 18197       |
| 18438                                                                       | 95586_at     | P2rx4   | purinergic receptor P2X, ligand-gated ion channel 4                | -1.501360477  | 0.003590554      | P2rx4   | -0.357716887   | 18438       |

|        |             |         |                                                             |              |             |         |              |        |
|--------|-------------|---------|-------------------------------------------------------------|--------------|-------------|---------|--------------|--------|
| 20230  | 99665_at    | Satb1   | special AT-rich sequence binding protein 1                  | -1.058315586 | 0.010956421 | Satb1   | 0.791047534  | 20230  |
| 20343  | 102838_at   | Sell    | selectin, lymphocyte                                        | -2.181838347 | 0.000382694 | Sell    | -0.219584047 | 20343  |
| 20499  | 104719_at   | Slc12a7 | solute carrier family 12, member 7                          | -1.955988627 | 0.001200637 | Slc12a7 | -0.561117665 | 20499  |
| 21414  | 97995_at    | Tcf7    | transcription factor 7, T cell specific                     | -1.217954722 | 0.025667119 | Tcf7    | 0.726064946  | 21414  |
| 21414  | 97994_at    | Tcf7    | transcription factor 7, T cell specific                     | -2.401344928 | 0.000110356 | Tcf7    | 0.726064946  | 21414  |
| 214162 | 104569_at   | Kmt2a   | lysine (K)-specific methyltransferase 2A                    | -1.139724183 | 0.033788904 | Kmt2a   | 0.739108499  | 214162 |
| 214162 | 104568_at   | Kmt2a   | lysine (K)-specific methyltransferase 2A                    | -0.488416889 | 0.303505533 | Kmt2a   | 0.739108499  | 214162 |
| 216363 | 95539_at    | Rab3ip  | RAB3A interacting protein                                   | -1.379111373 | 0.004057749 | Rab3ip  | -0.405463967 | 216363 |
| 216363 | 161209_r_at | Rab3ip  | RAB3A interacting protein                                   | 0.071175228  | 0.960669676 | Rab3ip  | -0.405463967 | 216363 |
| 21673  | 103962_at   | Dnmt    | deoxynucleotidyltransferase, terminal                       | -0.360019449 | 0.513655074 | Dnmt    | 0.250040618  | 21673  |
| 21673  | 161409_f_at | Dnmt    | deoxynucleotidyltransferase, terminal                       | -1.049351815 | 0.050494223 | Dnmt    | 0.250040618  | 21673  |
| 21673  | 103961_s_at | Dnmt    | deoxynucleotidyltransferase, terminal                       | -1.128136815 | 0.027342577 | Dnmt    | 0.250040618  | 21673  |
| 21682  | 103539_at   | Tec     | tec protein tyrosine kinase                                 | -1.479757819 | 0.002477571 | Tec     | 0.127132747  | 21682  |
| 22129  | 98555_at    | Ttc3    | tetratricopeptide repeat domain 3                           | -1.432631852 | 0.005973482 | Ttc3    | -0.142308553 | 22129  |
| 226442 | 94109_at    | Zfp281  | zinc finger protein 281                                     | -1.489293006 | 0.030919351 | Zfp281  | 0.020252303  | 226442 |
| 227937 | 96187_at    | Pkp4    | plakophilin 4                                               | -1.622356884 | 0.043636217 | Pkp4    | -0.011193158 | 227937 |
| 228019 | 160625_f_at | Mettl8  | methyltransferase like 8                                    | -1.029531591 | 0.019215962 | Mettl8  | 0.031758531  | 228019 |
| 228019 | 103359_at   | Mettl8  | methyltransferase like 8                                    | -0.870713604 | 0.11153255  | Mettl8  | 0.031758531  | 228019 |
| 228026 | 100977_at   | Pdki    | pyruvate dehydrogenase kinase, isoenzyme 1                  | -2.539153334 | 0.001382227 | Pdki    | -0.273078897 | 228026 |
| 23872  | 94246_at    | Ets2    | E26 avian leukemia oncogene 2, 3' domain                    | -1.048452181 | 0.018639064 | Ets2    | -0.178477368 | 23872  |
| 353282 | 100706_f_at | Sfmbt2  | Scm-like with four mbt domains 2                            | -1.590339234 | 0.012810908 | Sfmbt2  | 0.10563662   | 353282 |
| 51801  | 104680_at   | Ramp1   | receptor (calcitonin) activity modifying protein 1          | -1.503860348 | 0.003797726 | Ramp1   | -0.742792963 | 51801  |
| 56354  | 160153_at   | Dnajc7  | DnaJ (Hsp40) homolog, subfamily C, member 7                 | -1.300655035 | 0.008414899 | Dnajc7  | 0.475429901  | 56354  |
| 56812  | 98451_at    | Dnajb2  | DnaJ (Hsp40) homolog, subfamily B, member 2                 | -1.037269263 | 0.023660774 | Dnajb2  | -0.640692862 | 56812  |
| 59052  | 95045_at    | Mettl9  | methyltransferase like 9                                    | -1.060754445 | 0.036970283 | Mettl9  | 0.300560799  | 59052  |
| 66214  | 160359_at   | Rgcc    | regulator of cell cycle                                     | -1.18083893  | 0.012263299 | Rgcc    | -0.638803288 | 66214  |
| 66270  | 95518_at    | Fam134b | family with sequence similarity 134, member B               | -1.523816567 | 0.000858126 | Fam134b | -0.32442686  | 66270  |
| 66626  | 100586_i_at | Cdip1   | cell death inducing Trp53 target 1                          | -0.063878863 | NA          | Cdip1   | 0.073721738  | 66626  |
| 66626  | 100587_f_at | Cdip1   | cell death inducing Trp53 target 1                          | -1.218348255 | 0.017256327 | Cdip1   | 0.073721738  | 66626  |
| 66970  | 103504_at   | Ssbp2   | single-stranded DNA binding protein 2                       | -1.880930061 | 0.002849548 | Ssbp2   | -0.121705168 | 66970  |
| 67245  | 94505_at    | Peli1   | pellino 1                                                   | -1.222668136 | 0.026713839 | Peli1   | 0.148017655  | 67245  |
| 67393  | 95701_at    | Cxcr5   | CXCR5 finger 5                                              | -1.372323245 | 0.009479682 | Cxcr5   | -0.503672674 | 67393  |
| 67603  | 161536_r_at | Dusp6   | dual specificity phosphatase 6                              | 0.207140975  | NA          | Dusp6   | -0.983679534 | 67603  |
| 67603  | 93285_at    | Dusp6   | dual specificity phosphatase 6                              | -2.350745605 | 0.000110356 | Dusp6   | -0.983679534 | 67603  |
| 67865  | 161765_f_at | Rgs10   | regulator of G-protein signalling 10                        | -1.241399453 | 0.003537229 | Rgs10   | -0.419270002 | 67865  |
| 67865  | 160629_at   | Rgs10   | regulator of G-protein signalling 10                        | -2.085034316 | 0.000178329 | Rgs10   | -0.419270002 | 67865  |
| 67865  | 103384_at   | Rgs10   | regulator of G-protein signalling 10                        | 0.064224728  | NA          | Rgs10   | -0.419270002 | 67865  |
| 68703  | 103404_at   | Rere    | arginine glutamic acid dipeptide (RE) repeats               | -1.002122541 | 0.023880744 | Rere    | -0.175367945 | 68703  |
| 69740  | 100912_at   | Dph5    | DPH5 homolog (S. cerevisiae)                                | -1.604260363 | 0.018769027 | Dph5    | -0.292852299 | 69740  |
| 71994  | 160150_f_at | Cnn3    | calponin 3, acidic                                          | -2.621312916 | 2.00E-05    | Cnn3    | -0.093255852 | 71994  |
| 72148  | 161405_r_at | Tdrp    | testis development related protein                          | -0.030811165 | NA          | Tdrp    | -0.899090484 | 72148  |
| 72148  | 100902_at   | Tdrp    | testis development related protein                          | -4.174363739 | 3.43E-06    | Tdrp    | -0.899090484 | 72148  |
| 76566  | 96791_at    | Fam101b | family with sequence similarity 101, member B               | -3.110261813 | 7.50E-06    | Rfnb    | -0.704186517 | 76566  |
| 83814  | 103907_at   | Nedd4l  | neural precursor cell expressed, developmentally down-regul | -0.323616383 | 0.617534657 | Nedd4l  | -0.114303809 | 83814  |
| 83814  | 103906_f_at | Nedd4l  | neural precursor cell expressed, developmentally down-regul | -1.074239288 | 0.01892847  | Nedd4l  | -0.114303809 | 83814  |
